# Supplementary material for: Metal- and solvent-free domino reaction of 2-isocyanophenol esters to benzoxazines: long-range 1,5-acyl migration on 1,4-diazabutatriene
Source: Royal Society of Chemistry journal article supplement (doi:10.1039/d4cc01214c), 2024-01-01
Supplement: d4cc01214c1.pdf [file d4cc01214c1.pdf]

## Supporting Information

### **Metal- and solvent-free domino reaction of 2-isocyanophenol esters to benzoxazines: long-range 1,5-acyl migration on 1,4-diazabutatriene**

Alireza Akbari,<sup>‡a</sup> Hormoz Khosravi,<sup>‡a</sup> Felix Bauer,<sup>b</sup> Frank Rominger,<sup>c</sup> Bernhard Breit <sup>\*b</sup> and Saeed Balalaie <sup>\*a</sup>

<sup>a</sup> Peptide Chemistry Research Institute, Department of Chemistry, K. N. Toosi University of Technology, P.O. Box 15875-4416, Tehran, Iran

E-mail: balalaie@kntu.ac.ir.

<sup>b</sup> Institut für Organische Chemie, Albert-Ludwigs-Universität Freiburg, Albertstraße 21, 79104 Freiburg im Breisgau, Germany

E-mail: bernhard.breit@chemie.uni-freiburg.de

<sup>c</sup> Organisch-Chemisches Institut der Universität Heidelberg, Im Neuenheimer Feld 270, D-69120 Heidelberg, Germany.

‡ These authors have contributed equally to this work.

## Table of Contents

|    |                                                                      |     |
|----|----------------------------------------------------------------------|-----|
| 1. | General Considerations.....                                          | S2  |
| 2. | Experimental Procedures.....                                         | S3  |
| 3. | Follow-up Reactions.....                                             | S5  |
| 4. | Computational details.....                                           | S5  |
| 5. | Compounds Characterization Data.....                                 | S6  |
| 6. | References.....                                                      | S12 |
| 7. | X-Ray Crystallographic Analysis.....                                 | S13 |
| 8. | Z-matrices.....                                                      | S15 |
| 9. | <sup>1</sup> H-NMR and <sup>13</sup> C-NMR of unknown compounds..... | S39 |

### 1. General Considerations

- ❖ All final reactions were run in a flame-dried 50 mL Schenk tube filled with a 10 mm magnetic stirrer bar. Solvents and liquid reagents were added by Argon-flushed syringes or cannulas.
- All reagents and chemicals were purchased from chemical suppliers (Merck, Sigma-Aldrich, Fluka, Exir, and Alpha-Aesar) and used without further purification.
- **Solvents** employed for column chromatography and work-up were purchased in analytically pure grade and used without further purification. Solvents used for air and moisture-sensitive reactions were freshly distilled before use.
- ❖ **TLC** (Thin Layer Chromatography) was performed on silica gel pre-coated aluminum plates (Merck, 60 F-254) and was visualized by UV lamp ( $\lambda=254$  nm).
- ❖ **Flash Column Chromatography** was performed using a normal phase silica column packed with silica gel 60 (230-240 mesh).
- ❖ **Microwave-assisted reactions** were performed with a CEM Discover Focused Microwave System apparatus (CEM GmbH).
- ❖ **NMR** (Nuclear Magnetic Resonance) spectra were recorded using Bruker Avance 250 spectrometer (250 MHz and 63 MHz for <sup>1</sup>H and <sup>13</sup>C, respectively) and Bruker Avance 300 spectrometer (300 MHz and 75 MHz for <sup>1</sup>H and <sup>13</sup>C, respectively) and Bruker Avance 400 spectrometer (400 MHz and 101 MHz for <sup>1</sup>H and <sup>13</sup>C, respectively) and on a Bruker DRX 500 (500 MHz and 126 MHz for <sup>1</sup>H and <sup>13</sup>C, respectively). Spectrometer in CDCl<sub>3</sub>. Chemical shifts ( $\delta$ ) are given in ppm, relative to the signals for CDCl<sub>3</sub> (<sup>1</sup>H NMR:  $\delta=7.27$  ppm, <sup>13</sup>C NMR:  $\delta=77.00$  ppm) or DMSO-*d*<sub>6</sub> (<sup>1</sup>H NMR:  $\delta=2.5$  ppm, <sup>13</sup>C NMR:  $\delta=39.52$  ppm). Coupling constants (J) are reported in Hertz. Multiplicities for <sup>1</sup>H NMR are stated as follows: singlet (s), doublet (d), triplet (t), quartet (q), multiplet (m), and broad (br).
- ❖ **HRMS** (High-Resolution Mass Spectra) (ESI-TOF) was recorded using a Waters LCT Premier™ XE mass Spectrometer.
- ❖ **X-ray crystal data** were collected on Bruker APEX-II Quazar area detector. Ethanol was employed at room temperature for crystallizing 3b, while ethyl acetate was utilized for 2a.
- ❖ **Melting points** were measured in open capillary tubes on an Electrothermal 9100 digital melting point apparatus.

## 2. Experimental Procedures

### 2.1. General procedures for the synthesis of isocyanides 1a-o.

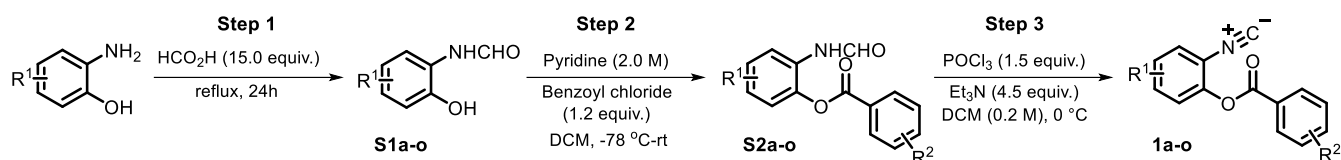

- **Step 1:** A solution of the substituted 2-aminophenol (1.0 equiv.) in HCO<sub>2</sub>H (15 equiv.) was heated in an oil bath for 18-24 hours. The reaction mixture was added 5% HCl and was extracted with AcOEt. The organic layer was washed with brine, dried over Na<sub>2</sub>SO<sub>4</sub>, filtered, and evaporated in vacuo. The residue was used for the next step without further purification.<sup>S1</sup>
- **Step 2:** To a solution of the substituted N-(2-hydroxyphenyl)formamide (1.0 equiv.) in pyridine (2 M) and DCM (0.2 M) was cooled in a dry ice bath, then benzoyl chloride (1.2 equiv.) was added dropwise over 10 min with stirring. Subsequently, the reaction mixture was then allowed to reach room temperature for 14 hours. After total consumption of the starting material was confirmed by TLC, the reaction mixture was extracted with dichloromethane (10 mL) and washed with a solution of diluted HCl (10 mL). The organic phase was then washed with water, dried on Na<sub>2</sub>SO<sub>4</sub>, filtrated, and evaporated under pressure. The residue was used for the next step without further purification.<sup>S2</sup>
- **Step 3:** A solution of the substituted 2-formamidophenyl benzoate (1.0 equiv.) and Et<sub>3</sub>N (4.5 equiv.) in DCM (0.2 M) was cooled at 0 °C, then POCl<sub>3</sub> (1.5 equiv.) was added dropwise. After the reaction was completed, a saturated Na<sub>2</sub>CO<sub>3</sub> aqueous solution was added at 0 °C, and the mixture was extracted with EA (3x50 mL). The combined organic phases were dried over anhydrous Na<sub>2</sub>SO<sub>4</sub>, filtered, and concentrated in vacuo. The residue was purified by column chromatography on silica gel, eluting with *n*-hexane and ethyl acetate (15:1) to afford the desired products **1a-o**.<sup>S3</sup>

### 2.2. General procedures for the synthesis of isocyanide 1p.

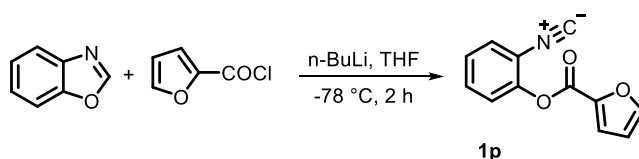

A 50 mL round-bottom flask equipped with a magnetic stir bar and charged with benzoxazole (0.90 g, 7.56 mmol) and THF (18 mL) is allowed to cool to -78 °C for five min prior to the addition of *n*-BuLi (1.6 M solution in hexanes, 4.96 mL, 7.94 mmol). The reaction mixture was allowed to stir at the same temperature for 1.5 h. The furan-2-carbonyl chloride (7.94 mmol) was added dropwise to the solution. The solution was allowed to warm to room temperature and stirred for two hours. The reaction mixture was poured onto a mixture of ether (100 mL) and saturated aqueous NaHCO<sub>3</sub> (50 mL). The organic layer was washed with water (2 x 50 mL), dried, and concentrated in *vacuo*. The resulting residue was purified by silica gel flash column chromatography (*n*-hexane /ethyl acetate 15:1), and the organics were concentrated in *vacuo* to provide the title compound **1p**.<sup>S4</sup>

## Supporting Information

### 2. 2. Typical procedure for the formation of Benzoxazine.

#### 2.2.1. General Procedure:

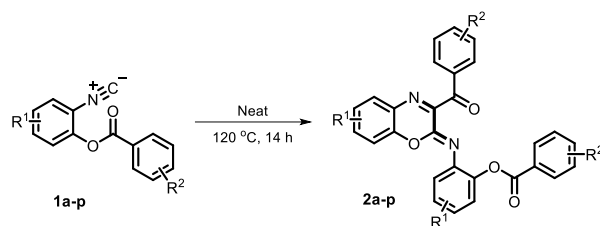

The Schlenk tube containing isocyanide **1a-p** (100 mg, 0.4 mmol) was placed in an oil bath and stirred at 120 °C for 14 h, in the absence of catalyst and solvent. After the completion of the reaction, the residue was chromatographed on silica gel using *n*-hexane and ethyl acetate (15:1) as an eluent to afford the products **2a-p**.

#### 2.2.3. Representative Procedure for Synthesis of **1a** in gram-scale reaction:

The Schlenk tube containing isocyanide **1a** (1 g, 0.4 mmol) was placed in an oil bath and stirred at 120 °C for 14 h, in the absence of catalyst and solvent. After the completion of the reaction, the residue was chromatographed on silica gel using *n*-hexane and ethyl acetate (12:1) as an eluent to afford the product **2a** in 68% yield (680 mg).

#### 2.2.4. Table S1. Optimization of the reaction conditions:

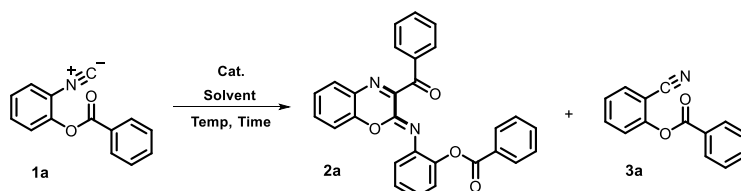

| Entry | Cat. (10 mol %)                    | Solvent         | Temp (°C) | Time (h) | Yield <sup>b</sup> (%) (2a/3a) |
|-------|------------------------------------|-----------------|-----------|----------|--------------------------------|
| 1     | -                                  | Neat            | 120       | 14       | 83,0                           |
| 2     | -                                  | DMF             | 130       | 12       | -                              |
| 3     | -                                  | DMSO            | 130       | 14       | -                              |
| 4     | -                                  | Dioxane         | 90        | 12       | -                              |
| 5     | -                                  | DMA             | 130       | 14       | -                              |
| 6     | -                                  | Toluene         | 100       | 16       | -                              |
| 7     | -                                  | Chlorobenzene   | 120       | 14       | -                              |
| 8     | -                                  | Xylene          | 120       | 14       | -                              |
| 9     | -                                  | Ethylene glycol | 120       | 14       | -                              |
| 10    | -                                  | DCM             | 80        | 14       | -                              |
| 11    | CuI                                | Toluene         | 100       | 12       | -                              |
| 12    | AlCl <sub>3</sub>                  | Toluene         | 100       | 12       | -                              |
| 13    | CuI                                | Xylene          | 120       | 12       | -                              |
| 14    | AlCl <sub>3</sub>                  | DMF             | 130       | 12       | -                              |
| 15    | CuI                                | DMF             | 130       | 12       | -                              |
| 16    | Pd(PPh <sub>3</sub> ) <sub>4</sub> | DMF             | 130       | 12       | -                              |
| 17    | Pd(OAc) <sub>2</sub>               | DMF             | 130       | 12       | -                              |
| 18    | Sc(OTf) <sub>3</sub>               | Xylene          | 120       | 12       | -                              |
| 19    | Ag(OTf) <sub>3</sub>               | Toluene         | 110       | 12       | -                              |
| 20    | Pd(PPh <sub>3</sub> ) <sub>4</sub> | Toluene         | 110       | 12       | -                              |
| 21    | Pd(OAc) <sub>2</sub>               | Toluene         | 110       | 12       | -                              |

<sup>a</sup> reaction condition: was performed with **1a** (0.2 mmol), catalyst (10 mol %) in solvent (1 mL) for 14 h. <sup>b</sup> Isolated yields are shown.

## 3. Follow-up Reactions

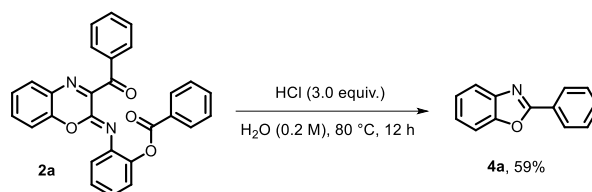

Figure S1. Compound 2a hydrolysis

Concentrated HCl (1.8 mmol, 3 equiv) was added to a solution of (Z)-2-((3-benzoyl-2H-benzo[b][1,4]oxazin-2-ylidene)amino)phenyl benzoate **2a** (0.60 mmol) in water (3 ml) and the reaction mixture was stirred in an oil bath at 80 °C for 6 h. then the reaction mixture was extracted with acetone (3×10 mL). The combined organic phases were dried over anhydrous Na<sub>2</sub>SO<sub>4</sub>, filtered, and concentrated in vacuo. The residue was purified by column chromatography on silica gel, eluting with *n*-hexane and ethyl acetate (20:1) to afford the product **4a** in 59% yield (69 mg).

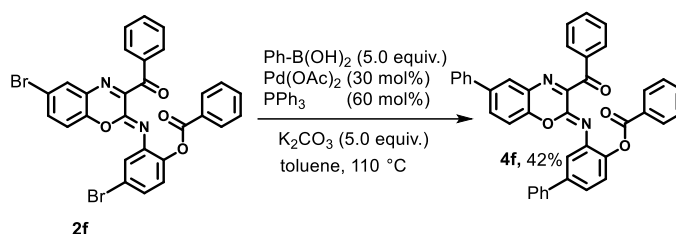

Figure S2. Cross-coupling reaction of compound 2f.

Compound **2f** (25 mg, 0.04 mmol) was added to a mixture of phenylboronic acid (25 mg, 0.2 mmol, 5.0 equiv.), Pd(OAc)<sub>2</sub> (2.8 mg, 0.012 mmol, 30 mol%), PPh<sub>3</sub> (6.5 mg, 0.024 mmol, 60 mol%), and K<sub>2</sub>CO<sub>3</sub> (29 mg, 0.2 mmol, 5.0 equiv.) in toluene (1.0 mL). The mixture was then stirred at 110 °C. After completion of the reaction as indicated by TLC, the solvent was evaporated, and the residue was purified by column chromatography on silica gel to provide the product **4f** in 42% yield (10.4 mg).

## 4. Computational details

All the DFT calculations have been carried out with the Gaussian 16 package of program<sup>S5</sup>, and visualization of computed structures was generated using CYLView.<sup>S6</sup> Full geometry optimization and Gibbs free energy correction were performed with the B3LYP-D3BJ/6-31+G(d,p) level in the gas phase (T=298 K, P=1 bar).<sup>S7</sup> The correctness of the optimized transition states (TS) and stable structures have been verified by intrinsic reaction coordinate (IRC) and the analytical frequency calculations respectively. In this study, the Non-Covalent Interaction (NCI) analysis<sup>S8</sup> was conducted using Multiwfn software,<sup>S9</sup> and the results were visualized using VMD.<sup>S10</sup>

## 5. Compounds Characterization Data

## 2-isocyanophenyl benzoate (1a)

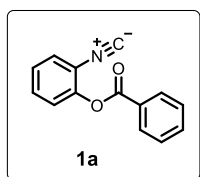

Colourless solid (870 mg, Yield 87%), mp 90-93°C;  $R_f$  = 0.20 (n-hexane /ethyl acetate 15:1); **<sup>1</sup>H-NMR** (300 MHz, CDCl<sub>3</sub>)  $\delta_H$  = 8.27 (dd,  $J$  = 8.5, 1.4 Hz, 2H), 7.70 (tt,  $J$  = 7.5, 1.3 Hz, 1H), 7.55 (t,  $J$  = 7.5, 2H), 7.52 – 7.44 (m, 2H), 7.43 – 7.36 (m, 1H), 7.32 (td,  $J$  = 7.9, 1.6 Hz, 1H) ppm; **<sup>13</sup>C-NMR** (101 MHz, CDCl<sub>3</sub>)  $\delta_C$  = 169.2, 163.9, 146.6, 134.2, 130.5, 130.4, 128.8, 128.4, 127.7, 126.6, 123.6 ppm; **HRMS-ESI** (m/z): calculated for C<sub>14</sub>H<sub>9</sub>NO<sub>2</sub> [M+H]<sup>+</sup> 224.0705 found 224.0705.

## 2-isocyano-5-methylphenyl 4-methoxybenzoate (1b)

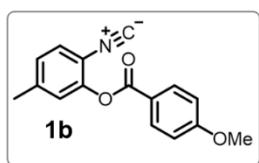

Pink solid (650 mg, Yield 65%), mp 92-95 °C,  $R_f$  = 0.21 (n-hexane /ethyl acetate 20:1); **<sup>1</sup>H-NMR** (300 MHz, CDCl<sub>3</sub>)  $\delta_H$  = 8.14 (d,  $J$  = 9.1 Hz, 2H), 7.30 (d,  $J$  = 8.1 Hz, 1H), 7.13 (br s, 1H), 7.03 (dd,  $J$  = 8.1, 1 Hz, 1H), 6.95 (d,  $J$  = 9.1 Hz, 2H), 3.85 (s, 3H), 2.36 (s, 3H) ppm; **<sup>13</sup>C-NMR** (101 MHz, CDCl<sub>3</sub>)  $\delta_C$  = 168.2, 164.3, 163.7, 146.5, 141.2, 132.6(2C), 127.2, 127.1, 124.1, 120.7, 114.1(2C), 55.6, 21.5 ppm; **HRMS-ESI** (m/z): calculated for C<sub>16</sub>H<sub>13</sub>NO<sub>3</sub> [M+H]<sup>+</sup> 268.0967 found 268.0962.

## 2-isocyano-5-methylphenyl 4-methylbenzoate (1c)

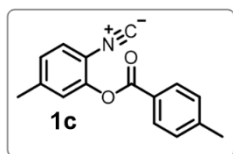

Colourless solid (750 mg, Yield 75%), mp 78-81°C,  $R_f$  = 0.25 (n-hexane /ethyl acetate 20:1); **<sup>1</sup>H-NMR** (400 MHz, CDCl<sub>3</sub>) (mixture of rotamers)  $\delta_H$  = 8.15 (d,  $J$  = 8.3 Hz, 1H), 8.06 (d,  $J$  = 8.3 Hz, 2H), 7.39 – 7.31 (m, 3H), 7.22 – 7.08 (m, 1H), 2.51 – 2.41 (m, 6H, Me) ppm; **<sup>13</sup>C-NMR** (101 MHz, CDCl<sub>3</sub>)  $\delta_C$  = 168.3, 164.1, 162.6, 146.4, 145.6, 145.1, 141.3, 130.7, 130.1, 129.6, 129.5, 127.2, 127.1, 126.2, 125.7, 124.1, 21.9, 21.5 ppm; **HRMS-ESI** (m/z): calculated for C<sub>16</sub>H<sub>13</sub>NO<sub>2</sub> [M+H]<sup>+</sup> 252.1018 found 252.1014.

## 2-isocyano-5-methylphenyl 3-methylbenzoate (1d)

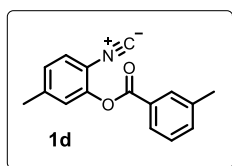

Colourless solid (485 mg, Yield 85%), mp 81-84°C,  $R_f$  = 0.19 (n-hexane /ethyl acetate 20:1); **<sup>1</sup>H-NMR** (400 MHz, )  $\delta_H$  = 8.00 – 7.96 (m, 2H) (7.98 (dd,  $J$  = 5.9, 1.7 Hz, 2H)), 7.41 (d,  $J$  = 7.7 Hz, 1H), 7.35 (t,  $J$  = 7.9 Hz, 1H), 7.29 (d,  $J$  = 8.1 Hz, 1H), 7.10 (d,  $J$  = 1.7 Hz, 1H), 7.03 (dd,  $J$  = 8.2, 1.7 Hz, 1H), 2.38 (s, 3H), 2.34 (s, 3H) ppm; **<sup>13</sup>C-NMR** (101 MHz, CDCl<sub>3</sub>)  $\delta_C$  = 168.2, 164.2, 146.4, 141.3, 138.6, 135.5, 135.0, 130.9, 128.8, 128.7, 127.8, 127.6, 127.2, 124.0, 21.5, 21.3 ppm; **HRMS-ESI** (m/z): calculated for C<sub>16</sub>H<sub>13</sub>NO<sub>2</sub> [M+H]<sup>+</sup> 252.1018 found 252.1010.

## 2-isocyano-5-methylphenyl benzoate (1e)

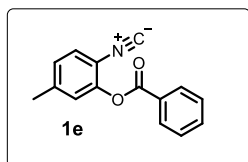

Colourless solid (710 mg, Yield 70 %), mp 108-111 °C,  $R_f$  = 0.22 (n-hexane /ethyl acetate 20:1); **<sup>1</sup>H-NMR** (300 MHz, CDCl<sub>3</sub>)  $\delta_H$  = 8.25 (dd,  $J$  = 8.5, 1.3 Hz, 2H), 7.73 – 7.62 (m, 1H), 7.62 – 7.48 (m, 2H), 7.37 (d,  $J$  = 8.1 Hz, 1H), 7.20 (br s, 1H), 7.12 (d,  $J$  = 8.1 Hz, 1H), 2.42 (s, 3H) ppm; **<sup>13</sup>C-NMR** (75 MHz, CDCl<sub>3</sub>)  $\delta_C$  = 168.5, 164.0, 146.3, 141.3, 134.2, 130.4, 128.7, 127.2, 124.1, 124.0, 117.7, 21.4 ppm; **HRMS-ESI** (m/z): calculated for C<sub>15</sub>H<sub>13</sub>NO<sub>2</sub> [M+H]<sup>+</sup> 238.0862 found 238.0863.

## 4-bromo-2-isocyanophenyl benzoate (1f)

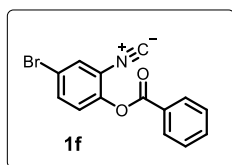

Colourless solid (420 mg, Yield 52%), mp 90-93 °C,  $R_f$  = 0.25 (n-hexane /ethyl acetate 15:1); **<sup>1</sup>H-NMR** (300 MHz, CDCl<sub>3</sub>)  $\delta_H$  = 8.14 (d,  $J$  = 8.0 Hz, 1H), 8.13 (d,  $J$  = 8.0 Hz, 1H), 7.60 (t,  $J$  = 7.3 Hz, 1H), 7.56 – 7.52 (m, 1H), 7.52 – 7.38 (m, 3H), 7.21 (d,  $J$  = 8.7 Hz, 1H) ppm; **<sup>13</sup>C-NMR** (76 MHz, CDCl<sub>3</sub>)  $\delta_C$  = 171.0, 163.6, 162.3, 145.8, 134.6, 134.4, 133.5, 130.6, 130.5, 130.4, 128.9, 128.8, 128.1, 125.0, 118.9 ppm; **HRMS-ESI** (m/z): calculated for C<sub>14</sub>H<sub>8</sub>BrNO<sub>2</sub> [M+H]<sup>+</sup> 301.9810 found 301.9804.

## 4-bromo-2-isocyanophenyl 4-methoxybenzoate (1g)

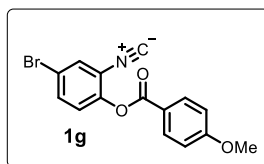

Colourless solid (370 mg, Yield 46%), mp 125-128 °C,  $R_f$  = 0.17 (n-hexane /ethyl acetate 20:1); **<sup>1</sup>H-NMR** (300 MHz, CDCl<sub>3</sub>)  $\delta_H$  = 8.11 (d,  $J$  = 8.6 Hz, 2H), 7.62 – 7.40 (m, 2H), 7.20 (br s, 1H), 6.93 (d,  $J$  = 8.6 Hz, 2H), 3.83 (s, 3H) ppm; **<sup>13</sup>C-NMR** (76 MHz, CDCl<sub>3</sub>)  $\delta_C$  = 170.8, 164.6, 163.2, 146.0, 133.5, 132.8, 130.3, 125.1, 120.3, 118.6, 114.2, 55.6 ppm; **HRMS-ESI** (m/z): calculated for C<sub>15</sub>H<sub>10</sub>BrNO<sub>3</sub> [M+H]<sup>+</sup> 331.9916 found 331.9911.

## Supporting Information

### 5-chloro-2-isocyanophenyl benzoate (1h)

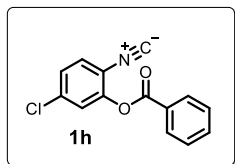

Colourless solid (375 mg, Yield 73%), mp 81-83°C,  $R_f = 0.2$  (n-hexane /ethyl acetate 12:1);  $^1\text{H-NMR}$  (300 MHz,  $\text{CDCl}_3$ )  $\delta_{\text{H}} = 8.26$  (d,  $J = 7.1$  Hz, 2H), 7.72 (t,  $J = 7.7$  Hz, 1H), 7.58 (t,  $J = 7.7$  Hz, 2H), 7.54 – 7.46 (m, 2H), 7.39 (d,  $J = 8.8$  Hz, 1H) ppm;  $^{13}\text{C-NMR}$  (75 MHz,  $\text{CDCl}_3$ )  $\delta_{\text{C}} = 170.8, 163.7, 162.4, 145.3, 134.6, 134.5, 131.7, 130.6, 130.5, 128.9, 128.8, 128.0, 127.5, 124.7$  ppm; **HRMS-ESI** (m/z): calculated for  $\text{C}_{14}\text{H}_8\text{ClNO}_2$   $[\text{M}+\text{H}]^+$  258.0316 found 258.0317.

### 5-chloro-2-isocyanophenyl 3-nitrobenzoate (1i)

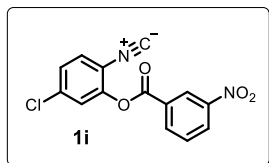

Colourless solid (280 mg, Yield 56%), mp 114-117°C,  $R_f = 0.21$  (n-hexane /ethyl acetate 15:1);  $^1\text{H-NMR}$  (300 MHz,  $\text{CDCl}_3$ )  $\delta_{\text{H}} = 9.10$  (s, 1H), 8.59 (d,  $J = 8.0$  Hz, 2H), 7.82 (t,  $J = 8.0$  Hz, 1H), 7.59 – 7.50 (m, 2H), 7.40 (d,  $J = 8.7$  Hz, 1H) ppm;  $^{13}\text{C-NMR}$  (75 MHz,  $\text{CDCl}_3$ )  $\delta_{\text{C}} = 171.4, 163.0, 161.7, 148.5, 144.7, 136.0, 132.5, 130.8, 130.3, 129.8, 128.8, 127.7, 125.5, 124.4$  ppm; **HRMS-ESI** (m/z): calculated for  $\text{C}_{14}\text{H}_7\text{ClN}_2\text{O}_4$   $[\text{M}+\text{H}]^+$  303.0166 found 303.0161.

### 5-chloro-2-isocyanophenyl 4-nitrobenzoate (1j)

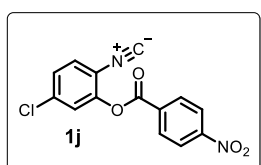

Colourless solid (254 mg, Yield 50%), mp 112-115°C,  $R_f = 0.18$  (n-hexane /ethyl acetate 15:1);  $^1\text{H-NMR}$  (300 MHz,  $\text{CDCl}_3$ )  $\delta_{\text{H}} = 8.42$  (d,  $J = 9.0$  Hz, 4H), 7.55 – 7.46 (m, 2H), 7.39 (d,  $J = 8.9$  Hz, 1H) ppm;  $^{13}\text{C-NMR}$  (75 MHz,  $\text{CDCl}_3$ )  $\delta_{\text{C}} = 171.3, 163.7, 161.4, 151.0, 144.3, 133.0, 132.0, 131.1(2\text{C}), 130.2, 127.2, 123.8, 123.4(2\text{C})$  ppm; **HRMS-ESI** (m/z): calculated for  $\text{C}_{14}\text{H}_7\text{ClN}_2\text{O}_4$   $[\text{M}+\text{H}]^+$  303.0166 found 303.0159.

### 5-chloro-2-isocyanophenyl 4-methoxybenzoate (1k)

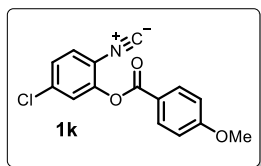

Colourless solid (322 mg, Yield 64%), mp 127-130°C,  $R_f = 0.22$  (n-hexane /ethyl acetate 20:1);  $^1\text{H-NMR}$  (400 MHz,  $\text{CDCl}_3$ )  $\delta_{\text{H}} = 8.20$  (d,  $J = 9.0$  Hz, 2H), 7.49 (dd,  $J = 8.2, 2.5$  Hz, 1H), 7.45 (d,  $J = 2.5$  Hz, 1H), 7.37 (d,  $J = 8.0$  Hz, 1H), 7.03 (d,  $J = 9.0$  Hz, 2H), 3.93 (s, 3H) ppm;  $^{13}\text{C-NMR}$  (101 MHz,  $\text{CDCl}_3$ )  $\delta_{\text{C}} = 170.6, 164.5, 163.3, 145.4, 132.8, 131.5, 130.5, 127.5, 124.8, 120.2, 114.2, 55.6$  ppm; **HRMS-ESI** (m/z): calculated for  $\text{C}_{15}\text{H}_{10}\text{ClNO}_3$   $[\text{M}+\text{H}]^+$  288.0421 found 288.0414.

### 2-isocyanato-5-methoxyphenyl benzoate (1l)

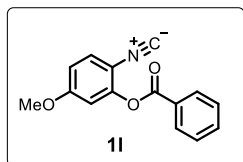

Colourless solid (370 mg, Yield 74%), mp 93-96°C,  $R_f = 0.20$  (n-hexane /ethyl acetate 15:1);  $^1\text{H-NMR}$  (250 MHz, DMSO) (mixture of two rotamers, 72/28) major rotamer:  $\delta_{\text{H}} = 8.15$  (d,  $J = 7.5$  Hz, 2H), 7.61 (t,  $J = 7.4$  Hz, 2H), 7.55 – 7.40 (m, 2H), 7.34 (br s, 1H), 7.15 (dd,  $J = 8.7, 2.7$  Hz, 1H), 3.80 (s, 3H) ppm;  $^{13}\text{C-NMR}$  (63 MHz,  $\text{CDCl}_3$ )  $\delta_{\text{C}} = 168.9, 164.3, 157.8, 139.9, 135.0, 133.3, 130.4, 129.6, 129.0, 128.4, 125.0, 120.3, 117.6, 112.7, 56.5$  ppm; **HRMS-ESI** (m/z): calculated for  $\text{C}_{15}\text{H}_{11}\text{NO}_3$   $[\text{M}+\text{H}]^+$  254.0811 found 254.0818.

### 2-isocyanato-5-methoxyphenyl 4-methoxybenzoate (1m)

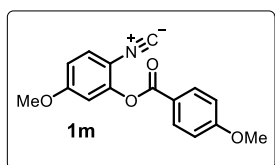

Colourless solid (350 mg, Yield 43%), mp 135-138°C,  $R_f = 0.21$  (n-hexane /ethyl acetate 15:1);  $^1\text{H-NMR}$  (250 MHz,  $\text{CDCl}_3$ )  $\delta_{\text{H}} = 8.19$  (d,  $J = 8.4$  Hz, 2H), 7.25 (d,  $J = 5.6$  Hz, 1H), 7.12 – 6.88 (m, 4H), 3.90 (s, 3H), 3.83 (s, 3H) ppm;  $^{13}\text{C-NMR}$  (63 MHz,  $\text{CDCl}_3$ )  $\delta_{\text{C}} = 168.7, 164.3, 164.0, 157.2, 140.2, 132.6, 124.3, 120.8, 116.3, 114.0, 112.2, 55.9, 55.5$  ppm; **HRMS-ESI** (m/z): calculated for  $\text{C}_{16}\text{H}_{13}\text{NO}_4$   $[\text{M}+\text{H}]^+$  284.0917 found 284.0918.

### 2-isocyanophenyl 4-methoxybenzoate (1n)

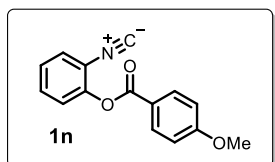

Colourless solid (770 mg, Yield 77%), mp 104-107°C,  $R_f = 0.20$  (n-hexane /ethyl acetate 15:1);  $^1\text{H-NMR}$  (300 MHz,  $\text{CDCl}_3$ ):  $\delta_{\text{H}} = 8.21$  (d,  $J = 8.9$  Hz, 2H), 7.46 (t,  $J = 7.6$  Hz, 2H), 7.39 (d,  $J = 7.2$  Hz, 1H), 7.31 – 7.24 (m, 1H), 7.01 (d,  $J = 8.9$  Hz, 2H), 3.90 (s, 3H) ppm;  $^{13}\text{C-NMR}$  (75 MHz,  $\text{CDCl}_3$ )  $\delta_{\text{C}} = 169.3, 164.0, 163.0, 146.4, 132.2$  (2C), 129.6, 127.0, 125.7, 123.2, 120.4, 113.7 (2C), 55.0 ppm; **HRMS-ESI** (m/z): calculated for  $\text{C}_{15}\text{H}_{11}\text{NO}_3$   $[\text{M}+\text{H}]^+$  254.0811 found 254.0818.

## Supporting Information

### 2-isocyanophenyl 3-methylbenzoate (1o)

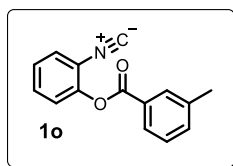

Colourless solid (412 mg, Yield 82%), mp 67-70°C,  $R_f = 0.21$  (n-hexane /ethyl acetate 20:1);  $^1\text{H-NMR}$  (400 MHz,  $\text{CDCl}_3$ )  $\delta_{\text{H}} = 8.11 - 8.05$  (m, 2H), 7.50 (td,  $J = 7.7, 2.0$  Hz, 3H), 7.44 (d,  $J = 7.9$  Hz, 1H), 7.42 - 7.38 (m, 1H), 7.33 (td,  $J = 7.7, 1.5$  Hz, 1H), 2.48 (s, 3H) ppm;  $^{13}\text{C-NMR}$  (101 MHz,  $\text{CDCl}_3$ )  $\delta_{\text{C}} = 169.1, 164.1, 146.7, 138.7, 135.0, 131.0, 130.4, 128.7, 128.3, 127.7$  (2C), 126.5, 123.6, 21.3 ppm; **HRMS-ESI** (m/z): calculated for  $\text{C}_{15}\text{H}_{11}\text{NO}_2$   $[\text{M}+\text{H}]^+$  238.0862 found 238.0857.

### 2-isocyanophenyl furan-2-carboxylate (1p)

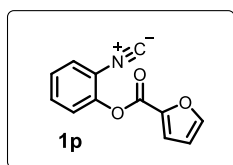

Colourless solid (550 mg, Yield 55%), mp 95-98°C,  $R_f = 0.20$  (n-hexane /ethyl acetate 15:1);  $^1\text{H-NMR}$  (300 MHz,  $\text{CDCl}_3$ )  $\delta_{\text{H}} = 7.75$  (dd,  $J = 2.4, 0.9$  Hz, 1H), 7.56 - 7.46 (m, 3H), 7.45 - 7.39 (m, 1H), 7.39 - 7.33 (m, 1H), 6.66 (dd,  $J = 3.6, 1.8$  Hz, 1H).  $^{13}\text{C-NMR}$  (75 MHz,  $\text{CDCl}_3$ )  $\delta_{\text{C}} = 169.4, 165.6, 155.4, 148.0, 145.8, 142.9, 130.4, 127.7, 126.8, 123.5, 120.8, 112.5$  ppm; **HRMS-ESI** (m/z): calculated for  $\text{C}_{12}\text{H}_7\text{NO}_3$   $[\text{M}+\text{H}]^+$  214.0498 found 214.0491.

### (Z)-2-((3-benzoyl-2H-benzo[b][1,4]oxazin-2-ylidene)amino)phenyl benzoate (2a)

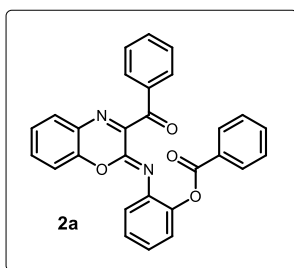

Yellow solid (83 mg, Yield 83%), mp 147-150°C,  $R_f = 0.18$  (n-hexanes /ethyl acetate 15:1);  $^1\text{H-NMR}$  (300 MHz,  $\text{CDCl}_3$ ) (mixture of two rotamers, 67/33):  $\delta_{\text{H}} = 8.37$  (d,  $J = 7.7$  Hz, 1H, minor rotamer), 8.25 (d,  $J = 8.8$  Hz, 2H, major rotamer), 8.10 (br s, 2H, minor rotamer), 7.91 (d,  $J = 8.5$  Hz, 2H, major rotamer), 7.75 (t,  $J = 9.0$  Hz, 2H, mixture of two rotamers), 7.70 - 7.64 (m, 1H, minor rotamer), 7.63 - 7.47 (m, 3H, mixture of two rotamers), 7.44 - 7.27 (m, 5H, mixture of two rotamers), 7.29 - 7.15 (m, 4H, mixture of two rotamers) ppm;  $^{13}\text{C-NMR}$  (75 MHz,  $\text{CDCl}_3$ ) major rotamer:  $\delta_{\text{C}} = 190.6, 165.3, 164.5, 156.6, 145.7, 143.8, 141.3, 136.3, 134.5, 134.0, 131.4, 130.8, 130.3, 130.1, 129.2, 128.8, 128.6, 128.3, 127.1, 126.7, 126.2, 125.1, 123.2, 122.9, 122.3, 116.0$  ppm; **HRMS-ESI** (m/z): calc. for  $\text{C}_{28}\text{H}_{18}\text{N}_2\text{O}_4$   $[\text{M}+\text{H}]^+$  447.1339, found 447.1335.

### (Z)-2-((3-(4-methoxybenzoyl)-7-methyl-2H-benzo[b][1,4]oxazin-2-ylidene)amino)-5-methylphenyl 4-methoxybenzoate (2b)

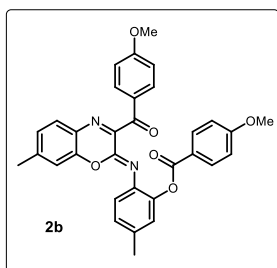

Yellow solid (67 mg, Yield 67%), mp 150-153°C,  $R_f = 0.2$  (n-hexane /ethyl acetate 8:1);  $^1\text{H-NMR}$  (400 MHz,  $\text{CDCl}_3$ ):  $\delta_{\text{H}} = 7.84$  (d,  $J = 8.8$  Hz, 2H), 7.71 (d,  $J = 8.9$  Hz, 2H), 7.49 (d,  $J = 8.2$  Hz, 1H), 7.46 (d,  $J = 8.2$  Hz, 1H), 7.07 (dd,  $J = 6.4, 2.0$  Hz, 1H), 7.04 (dd,  $J = 7.4, 1.8$  Hz, 1H), 7.00 (br s, 2H), 6.79 (d,  $J = 8.8$  Hz, 2H), 6.65 (d,  $J = 8.9$  Hz, 2H), 3.89 (s, 3H, OMe), 3.81 (s, 3H, OMe), 2.43 (s, 3H, Me), 2.39 (s, 3H, Me) ppm;  $^{13}\text{C-NMR}$  (101 MHz,  $\text{CDCl}_3$ ):  $\delta_{\text{C}} = 189.6, 164.4, 164.1, 163.4, 156.0, 145.6, 144.2, 142.3, 141.3, 136.9, 133.8, 132.0, 128.9, 128.8, 127.3, 126.6, 125.9, 123.7, 123.4, 121.7, 116.3, 113.7, 113.4, 55.4, 55.3, 21.6, 21.1$  ppm; **HRMS-ESI** (m/z): calc. for  $\text{C}_{32}\text{H}_{26}\text{N}_2\text{O}_6$   $[\text{M}+\text{H}]^+$  535.1863, found 535.1863.

### (Z)-5-methyl-2-((7-methyl-3-(4-methylbenzoyl)-2H-benzo[b][1,4]oxazin-2-ylidene)amino)phenyl 4-methylbenzoate (2c)

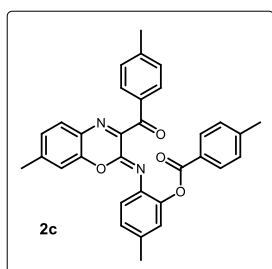

Yellow solid (57 mg, Yield 57%), mp 148-151°C,  $R_f = 0.2$  (n-hexane /ethyl acetate 8:1);  $^1\text{H-NMR}$  (400 MHz,  $\text{CDCl}_3$ ):  $\delta_{\text{H}} = 7.79$  (d,  $J = 8.2$  Hz, 2H), 7.63 (d,  $J = 8.2$  Hz, 2H), 7.46 (dd,  $J = 8.0, 1.1$  Hz, 2H), 7.14 (d,  $J = 8.0$  Hz, 2H), 7.09 (dd,  $J = 8.2, 2.0$  Hz, 1H), 7.03 - 7.01 (m, 3H), 6.97 (d,  $J = 8.0$  Hz, 2H), 2.44 (s, 3H), 2.43 (s, 3H), 2.39 (s, 3H), 2.32 (s, 3H) ppm;  $^{13}\text{C-NMR}$  (101 MHz,  $\text{CDCl}_3$ ):  $\delta_{\text{C}} = 190.6, 164.7, 155.9, 145.6, 144.9, 144.0, 143.7, 142.4, 136.9, 133.7, 131.8, 130.0, 129.7, 129.1, 128.9, 128.8, 126.7, 126.6, 125.9, 123.7, 123.4, 116.3, 21.8, 21.7, 21.6, 21.1$  ppm; **HRMS-ESI** (m/z): calc. for  $\text{C}_{32}\text{H}_{26}\text{N}_2\text{O}_4$   $[\text{M}+\text{H}]^+$  503.1965, found 503.1966.

### (Z)-5-methyl-2-((7-methyl-3-(3-methylbenzoyl)-2H-benzo[b][1,4]oxazin-2-ylidene)amino)phenyl 3-methylbenzoate (2d)

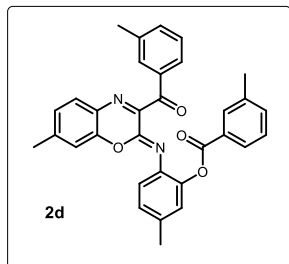

Yellow solid (63 mg, Yield 63%), mp 124-127°C,  $R_f = 0.2$  (n-hexane /ethyl acetate 8:1);  $^1\text{H-NMR}$  (400 MHz,  $\text{CDCl}_3$ ):  $\delta_{\text{H}} = 7.75$  (d,  $J = 7.8$  Hz, 1H), 7.72 (br s, 1H), 7.61 (br s, 1H), 7.55 - 7.48 (m, 3H), 7.35 (d,  $J = 7.6$  Hz, 1H), 7.27 (d,  $J = 8.7$  Hz, 1H), 7.24 - 7.20 (m, 1H), 7.12 (dd,  $J = 8.3, 2.0$  Hz, 1H), 7.10 - 7.04 (m, 4H), 2.46 (s, 3H), 2.41 (s, 3H), 2.35 (s, 3H), 2.28 (s, 3H) ppm;  $^{13}\text{C-NMR}$  (101 MHz,  $\text{CDCl}_3$ ):  $\delta_{\text{C}} = 191.1, 164.9, 155.9, 145.6, 144.1, 142.5, 141.2, 138.2, 137.9, 137.0, 134.9, 134.2, 133.9, 133.6, 130.4, 129.8, 128.9, 128.3, 128.1, 127.2, 127.1, 126.8, 126.0, 123.9, 123.4, 116.3, 21.6, 21.2$  ppm; **HRMS-ESI** (m/z): calc. for  $\text{C}_{32}\text{H}_{26}\text{N}_2\text{O}_4$   $[\text{M}+\text{H}]^+$  503.1965, found 503.1969.



## Supporting Information

### (Z)-2-((3-benzoyl-7-methyl-2H-benzo[b][1,4]oxazin-2-ylidene)amino)-5-methylphenyl benzoate (2e)

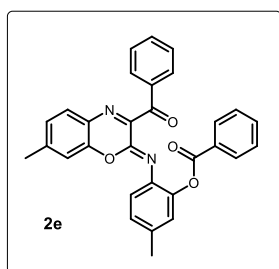

Yellow solid (78 mg, Yield 78%), mp 162-165°C,  $R_f = 0.2$  (n-hexane /ethyl acetate 8:1);  $^1\text{H-NMR}$  (400 MHz,  $\text{CDCl}_3$ ):  $\delta_{\text{H}} = 7.91$  (d,  $J = 7.0$  Hz, 2H), 7.72 (d,  $J = 7.0$  Hz, 2H), 7.56 – 7.50 (m, 2H), 7.48 (d,  $J = 8.0$  Hz, 1H), 7.44 – 7.32 (m, 3H), 7.19 (t,  $J = 7.8$  Hz, 2H), 7.11 (dd,  $J = 8.2, 1.2$  Hz, 1H), 7.09 – 7.01 (m, 3H), 2.44 (s, 3H), 2.39 (s, 3H) ppm;  $^{13}\text{C-NMR}$  (101 MHz,  $\text{CDCl}_3$ ):  $\delta_{\text{C}} = 190.9, 164.6, 155.7, 145.6, 144.2, 142.5, 141.2, 137.1, 134.1, 134.0, 133.6, 133.1, 132.4, 130.0, 129.5, 129.3, 128.9, 128.4, 128.3, 126.8, 126.0, 123.8, 123.4, 116.3, 21.6, 21.2$  ppm; **HRMS-ESI** (m/z): calc. for  $\text{C}_{30}\text{H}_{22}\text{N}_2\text{O}_4$   $[\text{M}+\text{H}]^+$  475.1652, found 475.1653.

### (Z)-2-((3-benzoyl-6-bromo-2H-benzo[b][1,4]oxazin-2-ylidene)amino)-4-bromophenyl benzoate (2f)

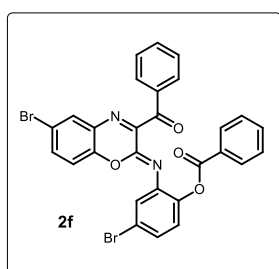

Yellow solid (62 mg, Yield 62%), mp 158-161°C,  $R_f = 0.2$  (n-hexane /ethyl acetate 8:1);  $^1\text{H-NMR}$  (400 MHz,  $\text{CDCl}_3$ ):  $\delta_{\text{H}} = 7.91$  (d,  $J = 6.9$  Hz, 2H), 7.77 (d,  $J = 2.4$  Hz, 1H), 7.72 (d,  $J = 6.8$  Hz, 2H), 7.65 (d,  $J = 2.4$  Hz, 1H), 7.63 – 7.54 (m, 2H), 7.45 (t,  $J = 7.5$  Hz, 1H), 7.42 – 7.34 (m, 3H), 7.24 (t,  $J = 7.8$  Hz, 2H), 7.14 (d,  $J = 5.6$  Hz, 1H), 7.11 (d,  $J = 5.4$  Hz, 1H) ppm;  $^{13}\text{C-NMR}$  (101 MHz,  $\text{CDCl}_3$ ):  $\delta_{\text{C}} = 189.8, 164.2, 157.1, 144.5, 142.9, 141.3, 137.4, 134.4, 134.3, 133.7, 133.6, 132.0, 131.7, 130.0, 129.6, 129.5, 128.7, 128.6, 128.4, 126.6, 124.4, 118.8, 117.6, 117.5$  ppm; **HRMS-ESI** (m/z): calc. for  $\text{C}_{28}\text{H}_{16}\text{Br}_2\text{N}_2\text{O}_4$   $[\text{M}+\text{H}]^+$  602.9549, found 602.9545.

### (Z)-4-bromo-2-((6-bromo-3-(4-methoxybenzoyl)-2H-benzo[b][1,4]oxazin-2-ylidene)amino)phenyl 4-methoxybenzoate (2g)

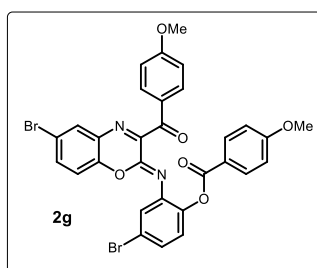

Yellow solid (56 mg, Yield 56%), mp 159-162°C,  $R_f = 0.2$  (n-hexane /ethyl acetate 8:1);  $^1\text{H-NMR}$  (250 MHz,  $\text{CDCl}_3$ ):  $\delta_{\text{H}} = 7.81$  (d,  $J = 8.5$  Hz, 2H), 7.69 (d,  $J = 8.5$  Hz, 2H), 7.56 (dd,  $J = 8.7, 2.4$  Hz, 2H), 7.34 (dd,  $J = 8.6, 2.4$  Hz, 1H), 7.08 (dd,  $J = 5.2, 3.5$  Hz, 2H), 7.05 – 6.95 (m, 1H), 6.80 (d,  $J = 8.4$  Hz, 2H), 6.69 (d,  $J = 8.4$  Hz, 2H), 3.87 (s, 2H), 3.81 (s, 3H) ppm;  $^{13}\text{C-NMR}$  (63 MHz,  $\text{CDCl}_3$ ):  $\delta_{\text{C}} = 187.0, 165.2, 164.2, 163.8, 157.3, 152.1, 150.1, 146.0, 144.6, 135.7, 134.1, 132.8, 132.5, 132.1, 131.1, 129.5, 126.8, 126.5, 124.9, 124.5, 123.8, 121.0, 120.6, 119.2, 118.4, 117.6, 114.3, 114.0, 113.6, 55.7, 55.5$  ppm; **HRMS-ESI** (m/z): calc. for  $\text{C}_{30}\text{H}_{20}\text{Br}_2\text{N}_2\text{O}_6$   $[\text{M}+\text{H}]^+$  662.9760, found 662.9768.

### (Z)-2-((3-benzoyl-7-chloro-2H-benzo[b][1,4]oxazin-2-ylidene)amino)-5-chlorophenyl benzoate (2h)

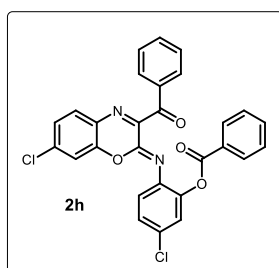

Yellow solid (55 mg, Yield 55%), mp 175-178°C,  $R_f = 0.2$  (n-hexane /ethyl acetate 8:1);  $^1\text{H-NMR}$  (300 MHz,  $\text{CDCl}_3$ ):  $\delta_{\text{H}} = 7.90$  (d,  $J = 7.2$  Hz, 2H), 7.72 (d,  $J = 7.2$  Hz, 2H), 7.61 (d,  $J = 2.5$  Hz, 1H), 7.57 (d,  $J = 7.2$  Hz, 1H), 7.51 (d,  $J = 2.5$  Hz, 1H), 7.44 (dd,  $J = 5.1, 2.5$  Hz, 1H), 7.42 – 7.31 (m, 3H), 7.27 – 7.14 (m, 5H) ppm;  $^{13}\text{C-NMR}$  (75 MHz,  $\text{CDCl}_3$ ):  $\delta_{\text{C}} = 189.9, 164.3, 157.2, 144.0, 142.4, 141.3, 137.1, 134.4, 133.6, 133.6, 131.4, 131.3, 131.3, 130.5, 130.0, 129.5, 129.0, 128.7, 128.6, 128.4, 126.6, 124.0, 123.7, 117.2$  ppm; **HRMS-ESI** (m/z): calc. for  $\text{C}_{28}\text{H}_{16}\text{Cl}_2\text{N}_2\text{O}_4$   $[\text{M}+\text{H}]^+$  515.0559, found 515.0554.

### (Z)-5-chloro-2-((7-chloro-3-(3-nitrobenzoyl)-2H-benzo[b][1,4]oxazin-2-ylidene)amino)phenyl 3-nitrobenzoate (2i)

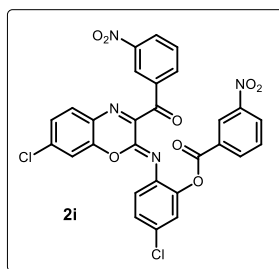

Yellow solid (37 mg, Yield 37%), mp 187-190°C,  $R_f = 0.2$  (n-hexane /ethyl acetate 10:1);  $^1\text{H-NMR}$  (400 MHz,  $\text{CDCl}_3$ ):  $\delta_{\text{H}} = 8.66$  (s, 1H), 8.48 – 8.40 (m, 2H), 8.30 (t,  $J = 7.5$  Hz, 2H), 8.05 (d,  $J = 7.8$  Hz, 1H), 7.75 (d,  $J = 2.4$  Hz, 1H), 7.65 (d,  $J = 7.8$  Hz, 2H), 7.59 – 7.49 (m, 2H), 7.34 – 7.29 (m, 2H), 7.18 (d,  $J = 8.7$  Hz, 1H) ppm;  $^{13}\text{C-NMR}$  (101 MHz,  $\text{CDCl}_3$ ):  $\delta_{\text{C}} = 187.3, 162.2, 155.6, 148.1, 148.0, 143.9, 143.5, 140.9, 136.0, 135.6, 135.0, 134.8, 132.2, 131.9, 131.2, 131.0, 130.5, 130.0, 129.8, 129.3, 128.4, 128.0, 127.7, 124.8, 124.2, 124.0, 123.6, 117.4$  ppm; **HRMS-ESI** (m/z): calc. for  $\text{C}_{28}\text{H}_{14}\text{Cl}_2\text{N}_4\text{O}_8$   $[\text{M}+\text{H}]^+$  605.0261, found 605.0262.

## Supporting Information

### (Z)-5-chloro-2-((7-chloro-3-(4-nitrobenzoyl)-2H-benzo[b][1,4]oxazin-2-ylidene)amino)phenyl 4-nitrobenzoate (2j)

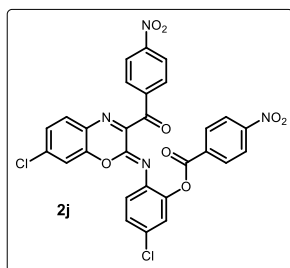

Yellow solid (43 mg, Yield 43%), mp 182-185°C,  $R_f = 0.2$  (n-hexane /ethyl acetate 10:1);  $^1\text{H-NMR}$  (400 MHz,  $\text{CDCl}_3$ ) (mixture of two rotamers, 67/33) major rotamer:  $\delta_{\text{H}} = 8.42$  (d,  $J = 8.8$  Hz, 4H), 8.24 (d,  $J = 8.8$  Hz, 4H), 7.87 (d,  $J = 2.5$  Hz, 2H), 7.69 (dd,  $J = 8.9, 2.5$  Hz, 2H), 7.42 (d,  $J = 8.9$  Hz, 2H), ppm;  $^{13}\text{C-NMR}$  (101 MHz,  $\text{CDCl}_3$ ):  $\delta_{\text{C}} = 186.8, 161.1, 153.9, 151.1, 150.0, 149.6, 146.2, 145.7, 138.5, 134.0, 131.7, 131.2, 130.6, 130.5, 129.8, 128.6, 128.6, 126.7, 126.5, 126.5, 124.3, 124.2, 124.0, 121.8, 120.6, 119.2, 118.2, 111.7$  ppm; **HRMS-ESI** (m/z): calc. for  $\text{C}_{28}\text{H}_{14}\text{Cl}_2\text{N}_4\text{O}_8$   $[\text{M}+\text{H}]^+$  605.0261, found 605.0259.

### (Z)-5-chloro-2-((7-chloro-3-(4-methoxybenzoyl)-2H-benzo[b][1,4]oxazin-2-ylidene)amino)phenyl 4-methoxybenzoate (2k)

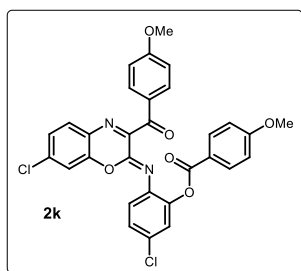

Yellow solid (46 mg, Yield 46%), mp 167-170°C,  $R_f = 0.2$  (n-hexanes /ethyl acetate 15:1);  $^1\text{H-NMR}$  (400 MHz,  $\text{CDCl}_3$ ):  $\delta_{\text{H}} = 7.85$  (d,  $J = 8.9$  Hz, 2H), 7.73 (d,  $J = 8.9$  Hz, 2H), 7.62 (d,  $J = 2.5$  Hz, 1H), 7.50 (d,  $J = 2.5$  Hz, 1H), 7.43 (dd,  $J = 8.7, 2.5$  Hz, 1H), 7.24 (dd,  $J = 8.7, 2.5$  Hz, 1H), 7.18 (t,  $J = 8.8$  Hz, 2H), 6.83 (d,  $J = 8.9$  Hz, 2H), 6.72 (d,  $J = 8.9$  Hz, 2H), 3.92 (s, 3H), 3.85 (s, 3H) ppm;  $^{13}\text{C-NMR}$  (101 MHz,  $\text{CDCl}_3$ ):  $\delta_{\text{C}} = 187.0, 165.1, 164.5, 164.2, 152.2, 150.1, 145.9, 145.5, 140.3, 132.9, 132.7, 132.2, 131.2, 130.8, 129.5, 126.9, 126.4, 125.1, 124.2, 118.0, 114.7, 114.3, 114.1, 113.9, 55.7, 55.6$  ppm; **HRMS-ESI** (m/z): calc. for  $\text{C}_{30}\text{H}_{20}\text{Cl}_2\text{N}_2\text{O}_6$   $[\text{M}+\text{H}]^+$  575.0770, found 575.0776.

### (Z)-2-((3-benzoyl-7-methoxy-2H-benzo[b][1,4]oxazin-2-ylidene)amino)-5-methoxyphenyl benzoate (2l)

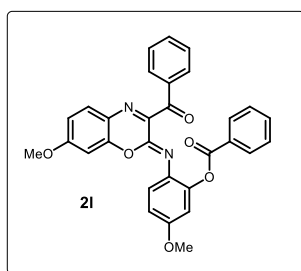

Yellow solid (52 mg, Yield 52%), mp 155-158°C,  $R_f = 0.22$  (n-hexanes /ethyl acetate 15:1);  $^1\text{H-NMR}$  (400 MHz,  $\text{CDCl}_3$ ): Since this product appears as the mixture of rotamers, the  $^1\text{H-NMR}$  spectrum is not very characteristic (for more detail show Figure S83).  $^{13}\text{C-NMR}$  (76 MHz,  $\text{CDCl}_3$ ):  $\delta_{\text{C}} = 190.7, 165.3, 164.9, 157.8, 156.7, 134.2, 133.2, 132.1, 130.9, 130.3, 130.0, 129.6, 129.0, 128.9, 128.6, 128.3, 126.9, 122.7, 118.7, 116.6, 111.0, 107.4, 55.9, 55.8$  ppm; **HRMS-ESI** (m/z): calc. for  $\text{C}_{30}\text{H}_{22}\text{N}_2\text{O}_6$   $[\text{M}+\text{H}]^+$  507.1550, found 507.15558.

### (Z)-5-methoxy-2-((7-methoxy-3-(4-methoxybenzoyl)-2H-benzo[b][1,4]oxazin-2-ylidene)amino)phenyl 4-methoxybenzoate (2m)

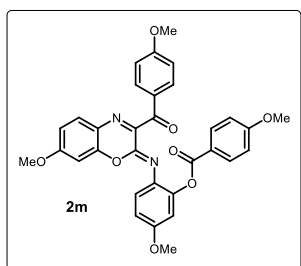

Yellow solid (65 mg, Yield 65%), mp 152-155°C,  $R_f = 0.21$  (n-hexanes /ethyl acetate 10:1);  $^1\text{H-NMR}$  (250 MHz,  $\text{CDCl}_3$ ) (mixture of two rotamers, 81/19) major rotamer:  $\delta_{\text{H}} = 7.82$  (d,  $J = 8.2$  Hz, 2H), 7.70 (d,  $J = 8.2$  Hz, 2H), 7.27 (br s, 1H), 7.15 – 7.07 (m, 2H), 7.05 – 6.90 (m, 3H), 6.75 (d,  $J = 7.9$  Hz, 2H), 6.62 (d,  $J = 8.4$  Hz, 2H), 3.98 – 3.79 (m, 12H, 4OMe) ppm;  $^{13}\text{C-NMR}$  (101 MHz,  $\text{CDCl}_3$ ):  $\delta_{\text{C}} = 187.7, 165.0, 164.1, 163.9, 157.3, 156.6, 151.5, 151.0, 141.2, 132.8(2\text{C}), 132.7, 132.1(2\text{C}), 127.1, 124.0, 121.3, 117.5, 116.6, 114.3, 114.0, 113.9, 113.8, 111.6, 56.0, 55.7, 55.4, 55.3$  ppm; **HRMS-ESI** (m/z): calc. for  $\text{C}_{32}\text{H}_{26}\text{N}_2\text{O}_8$   $[\text{M}+\text{H}]^+$  567.1761, found 567.1761.

### (Z)-2-((3-(4-methoxybenzoyl)-2H-benzo[b][1,4]oxazin-2-ylidene)amino)phenyl 4-methoxybenzoate (2n)

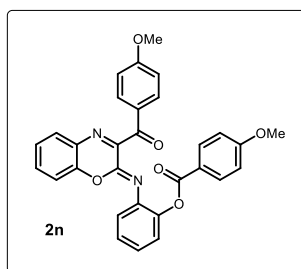

Yellow solid (81 mg, Yield 81%), mp 157-160°C  $R_f = 0.2$  (n-hexanes /ethyl acetate 15:1);  $^1\text{H-NMR}$  (300 MHz,  $\text{CDCl}_3$ ) (mixture of two rotamers, 58/42):  $\delta_{\text{H}} = 8.26$  (d,  $J = 8.0$  Hz, 1H, minor rotamer), 8.12 (d,  $J = 8.9$  Hz, 1H, major rotamer), 7.95 – 7.91 (m, 1H, minor rotamer), 7.75 (d,  $J = 8.8$  Hz, 2H, major rotamer), 7.70 – 7.65 (m, 2H, mixture of two rotamers), 7.51 (dd,  $J = 7.8, 1.7$  Hz, 1H, minor rotamer), 7.43 (dd,  $J = 7.6, 1.9$  Hz, 1H, minor rotamer), 7.37 – 7.30 (m, 1H, minor rotamer), 7.20 – 7.05 (m, 4H, mixture of two rotamers), 6.94 (d,  $J = 9.0$  Hz, 1H, minor rotamer), 6.81 (d,  $J = 8.9$  Hz, 1H, minor rotamer), 6.70 (d,  $J = 9.0$  Hz, 2H, major rotamer), 6.58 (d,  $J = 8.9$  Hz, 2H, major rotamer), 3.84 (s, 3H, OMe, minor rotamer), 3.79 (s, 3H, OMe, major rotamer), 3.76 (s, 3H, OMe, minor rotamer), 3.72 (s, 3H, OMe, major rotamer) ppm;  $^{13}\text{C-NMR}$  (75 MHz,  $\text{CDCl}_3$ ) mixture of two rotamers:  $\delta_{\text{C}} = 191.3, 164.8, 164.3, 163.5, 145.7, 144.0, 141.5, 136.5, 132.5, 132.1, 131.3, 130.9, 129.3, 128.9, 127.1, 126.5, 126.0, 125.1, 124.8, 123.7, 123.0, 121.6, 116.0, 114.2, 114.0, 113.8, 113.5, 55.4, 55.3$  ppm. **HRMS-ESI** (m/z): calc. for  $\text{C}_{30}\text{H}_{22}\text{N}_2\text{O}_6$   $[\text{M}+\text{H}]^+$  507.1550, found 507.1557.

## Supporting Information

### (Z)-2-((3-(3-methylbenzoyl)-2H-benzo[b][1,4]oxazin-2-ylidene)amino)phenyl 3-methylbenzoate (2o)

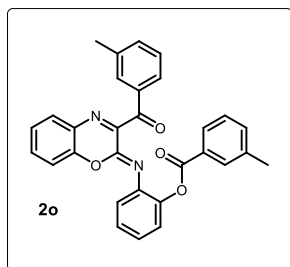

Yellow solid (66 mg, Yield 66%), mp 107-110°C,  $R_f = 0.2$  (n-hexanes /ethyl acetate 15:1);  **$^1\text{H-NMR}$**  (400 MHz,  $\text{CDCl}_3$ ) Since this product appears as the mixture of two rotamers, the  $^1\text{H-NMR}$  spectrum is not very characteristic (for more detail show Figure S92, a mixture of two rotamers, 75/25):  $\delta_{\text{H}} = 8.15 - 8.06$  (m, 1H), 7.92 - 7.82 (m, 1H), 7.28 - 7.71 (m, 1H), 7.71 - 7.61 (m, 2H), 7.57 - 7.50 (m, 2H), 7.47 - 7.42 (m, 2H), 7.38 - 7.30 (m, 2H), 7.38 - 7.21 (m, 4H), 7.11 - 7.05 (m, 1H), 7.52 - 7.23 (m, 6H) ppm;  **$^{13}\text{C-NMR}$**  (101 MHz,  $\text{CDCl}_3$ ) major rotamer:  $\delta_{\text{C}} = 189.4, 167.3, 163.9, 151.2, 150.7, 147.0, 138.9, 135.7, 134.8, 134.1, 133.1, 130.5$  (2C), 130.2 (2C), 129.7, 128.8 (2C), 128.2, 127.6 (2C), 126.1, 122.4, 120.6, 119.8, 116.9, 21.4, 21.0 ppm; **HRMS-ESI** (m/z): calc. for  $\text{C}_{30}\text{H}_{22}\text{N}_2\text{O}_4$   $[\text{M}+\text{H}]^+$  475.1652, found 475.1658.

### (Z)-2-((3-(furan-2-carbonyl)-2H-benzo[b][1,4]oxazin-2-ylidene)amino)phenyl furan-2-carboxylate (2p)

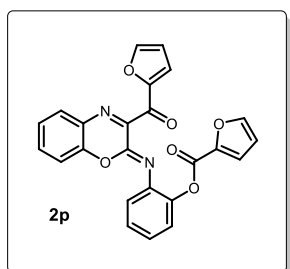

Yellow solid (47 mg, Yield 47%), mp 144-147°C,  $R_f = 0.15$  (n-hexanes /ethyl acetate 10:1);  **$^1\text{H-NMR}$**  (400 MHz,  $\text{CDCl}_3$ ): Since this product appears as the mixture of rotamers, the  $^1\text{H-NMR}$  spectrum is not very characteristic (for more detail show Figure S95).  **$^{13}\text{C-NMR}$**  (101 MHz,  $\text{CDCl}_3$ ) mixture of two rotamers:  $\delta_{\text{C}} = 175.9, 157.3, 155.4, 150.6, 150.2, 149.0, 147.7, 147.2, 145.2, 143.1, 133.6, 130.4, 128.8, 127.4, 127.3, 126.7, 126.2, 125.2, 124.1, 123.4, 122.7, 122.4, 121.1, 120.6, 119.9, 116.9, 116.7, 113.0, 112.2, 112.1$  ppm; **HRMS-ESI** (m/z): calc. for  $\text{C}_{24}\text{H}_{14}\text{N}_2\text{O}_6$   $[\text{M}+\text{H}]^+$  427.0924, found 427.0925.

### 2-cyano-5-methylphenyl 4-methoxybenzoate (3b)

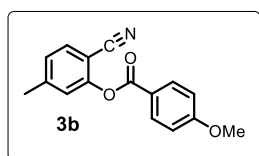

white solid (25 mg, Yield 25%), mp 184-187°C,  $R_f = 0.22$  (n-hexanes /ethyl acetate 8:1);  **$^1\text{H-NMR}$**  (300 MHz,  $\text{CDCl}_3$ ):  $\delta_{\text{H}} = 8.20$  (d,  $J = 9.0$  Hz, 2H), 7.59 (d,  $J = 7.9$  Hz, 1H), 7.30 - 7.25 (m, 1H), 7.20 - 7.10 (m, 1H), 7.01 (d,  $J = 9.0$  Hz, 2H), 3.91 (s, 3H), 2.46 (s, 3H) ppm;  **$^{13}\text{C-NMR}$**  (75 MHz,  $\text{CDCl}_3$ ):  $\delta_{\text{C}} = 164.4, 163.7, 152.7, 145.5, 132.7, 127.0, 126.9, 123.9, 123.9, 120.6, 115.6, 114.1, 113.9, 103.9, 55.5, 21.9$  ppm; **HRMS-ESI** (m/z): calc. for  $\text{C}_{16}\text{H}_{13}\text{NO}_3$   $[\text{M}+\text{H}]^+$  268.0967, found 268.0968.

### 2-cyano-5-methoxyphenyl 4-methoxybenzoate (3m)

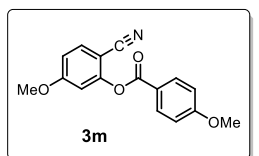

White solid (33 mg, Yield 33%), mp 148-151°C,  $R_f = 0.25$  (n-hexanes /ethyl acetate 10:1);  **$^1\text{H-NMR}$**  (250 MHz, DMSO):  $\delta_{\text{H}} = 8.09$  (d,  $J = 9.2$  Hz, 2H), 7.61 - 7.42 (m, 2H), 7.42 - 7.28 (m, 1H), 7.13 (d,  $J = 9.2$  Hz, 2H), 3.86 (s, 3H, OMe), 3.81 (s, 3H, OMe) ppm;  **$^{13}\text{C-NMR}$**  (63 MHz, DMSO):  $\delta_{\text{C}} = 164.6, 157.4, 146.1, 132.7$  (2C), 125.3, 121.6, 120.3, 117.7, 115.6, 115.0, 107.2, 56.5, 56.2 ppm; **HRMS-ESI** (m/z): calc. for  $\text{C}_{16}\text{H}_{13}\text{NO}_4$   $[\text{M}+\text{H}]^+$  284.0917, found 284.0918.

### 2-phenylbenzo[d]oxazole (4a)

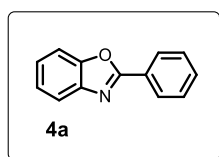

White solid (59 mg, Yield 59%), mp 101-103°C,  $R_f = 0.18$  (n-hexanes /ethyl acetate 20:1);  **$^1\text{H-NMR}$**  (400 MHz,  $\text{CDCl}_3$ ):  $\delta_{\text{H}} = 8.34 - 8.27$  (m, 2H), 7.86 - 7.78 (m, 1H), 7.67 - 7.60 (m, 1H), 7.60 - 7.52 (m, 3H), 7.42 - 7.36 (m, 2H) ppm;  **$^{13}\text{C-NMR}$**  (101 MHz,  $\text{CDCl}_3$ ):  $\delta_{\text{C}} = 163.1, 150.8, 142.2, 131.5, 128.9, 127.7, 127.2, 125.1, 124.6, 120.1, 110.6$  ppm; **HRMS-ESI** (m/z): calc. for  $\text{C}_{13}\text{H}_9\text{NO}$   $[\text{M}+\text{H}]^+$  196.0756, found 196.0753.

### (Z)-3-((3-(3-benzoyl-6-phenyl-2H-benzo[b][1,4]oxazin-2-ylidene)amino)-[1,1'-biphenyl]-4-yl) benzoate (4f)

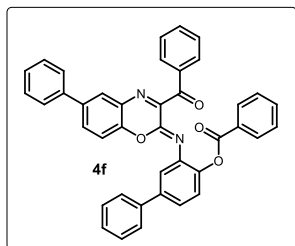

Yellow solid (12 mg, Yield 42%),  $R_f = 0.2$  (n-hexane /ethyl acetate 12:1);  **$^1\text{H-NMR}$**  (500 MHz,  $\text{CDCl}_3$ ):  $\delta_{\text{H}} = 7.97$  (d,  $J = 6.9$  Hz, 2H), 7.85 (d,  $J = 2.2$  Hz, 1H), 7.81 (d,  $J = 6.9$  Hz, 2H), 7.73 (d,  $J = 2.2$  Hz, 1H), 7.68 - 7.62 (m, 2H), 7.60 - 7.57 (m, 2H), 7.57 - 7.53 (m, 1H), 7.51 - 7.42 (m, 6H), 7.42 - 7.35 (m, 4H), 7.34 - 7.30 (m, 1H), 7.28 - 7.21 (m, 4H) ppm;  **$^{13}\text{C-NMR}$**  (126 MHz,  $\text{CDCl}_3$ ):  $\delta_{\text{C}} = 190.5, 164.5, 156.8, 145.0, 142.8, 141.6, 140.4, 139.5, 139.1, 138.6, 136.6, 134.1, 133.3, 131.0, 130.4, 130.3, 130.1, 129.6, 129.3, 129.0, 128.9, 128.5, 128.4, 127.9, 127.6, 127.5, 127.2, 126.9, 125.2, 123.2, 122.4, 116.3$  ppm; **HRMS-ESI** (m/z): calc. for  $\text{C}_{40}\text{H}_{26}\text{N}_2\text{O}_4$   $[\text{M}+\text{H}]^+$  599.1965, found 599.1963.

## Supporting Information

### 6. References

- [S1] T. Okitsu, K. Nagase, N. Nishio and A. Wada, *Org. Lett.*, **2012**, 14, 708–711.
- [S2] G. Siano, S. Crespi, M. Mella and S. M. Bonesi, *J. Org. Chem.*, **2019**, 84, 4338–4352.
- [S3] S. Su, J. Li, M. Sun, H. Zhao, Y. Chen and J. Li, *Chem. Comm.*, **2018**, 54, 9611–9614.
- [S4] M. C. Pirrung, S. Ghorai, *J. Am. Chem. Soc.*, **2006**, 128, 11772–11773.
- [S5] Gaussian 16, Revision B.01, M. J. Frisch, G. W. Trucks, H. B. Schlegel, G. E. Scuseria, M. A. Robb, J. R. Cheeseman, G. Scalmani, V. Barone, G. A. Petersson, H. Nakatsuji, X. Li, M. Caricato, A. V. Marenich, J. Bloino, B. G. Janesko, R. Gomperts, B. Mennucci, H. P. Hratchian, J. V. Ortiz, A. F. Izmaylov, J. L. Sonnenberg, D. Williams-Young, F. Ding, F. Lipparini, F. Egidi, J. Goings, B. Peng, A. Petrone, T. Henderson, D. Ranasinghe, V. G. Zakrzewski, J. Gao, N. Rega, G. Zheng, W. Liang, M. Hada, M. Ehara, K. Toyota, R. Fukuda, J. Hasegawa, M. Ishida, T. Nakajima, Y. Honda, O. Kitao, H. Nakai, T. Vreven, K. Throssell, J. A. Montgomery, Jr., J. E. Peralta, F. Ogliaro, M. J. Bearpark, J. J. Heyd, E. N. Brothers, K. N. Kudin, V. N. Staroverov, T. A. Keith, R. Kobayashi, J. Normand, K. Raghavachari, A. P. Rendell, J. C. Burant, S. S. Iyengar, J. Tomasi, M. Cossi, J. M. Millam, M. Klene, C. Adamo, R. Cammi, J. W. Ochterski, R. L. Martin, K. Morokuma, O. Farkas, J. B. Foresman, and D. J. Fox, Gaussian, Inc., Wallingford CT, 2016.
- [S6] CYLview20; C. Y. Legault, Université de Sherbrooke, 2020 (<http://www.cylview.org>).
- [S7] (a) A. D. Becke, *J. Chem. Phys.*, **1993**, 98, 1372–1377. (b) A. D. Becke, *J. Chem. Phys.*, **1993**, 98, 5648–5652. (c) C. Lee, W. Yang, R. G. Parr, *Phys. Rev. B* **1988**, 37, 785–789. (d) S. Grimme, J. Antony, S. Ehrlich, H. Krieg, *J. Chem. Phys.*, **2010**, 132, 154104. (e) Z. Hu, H. Yuan, Y. Men, Q. Liu, J. Zhang, X. Xu, *Angew. Chem. Int. Ed.*, **2016**, 128, 7193–7196.
- [S8] E. R. Johnson, S. Keinan, P. Mori-Sanchez, J. Contreras-Garcia, A. J. Cohen, W. T. Yang, *J. Am. Chem. Soc.*, **2010**, 132, 18, 6498–6506.
- [S9] T. Lu, F. Chen, *J. Comput. Chem.*, **2012**, 33, 580–592.
- [S10] W. Humphrey, A. Dalke, K. Schulten, *J. Molec. Graphics*, **1996**, 14, 33–38.
- [S11] Li, Z., Song, L., Van Meervelt, L., Tian, G., & Van der Eycken, E. V, *ACS Catal.*, **2018**, 8, 6388–6393.

## 7. X-Ray Crystallographic Analysis

Table S2. Crystal data and structure refinement for sba188.

|                                   |                                                               |                             |
|-----------------------------------|---------------------------------------------------------------|-----------------------------|
| Identification code               | sba188                                                        |                             |
| Empirical formula                 | C <sub>28</sub> H <sub>18</sub> N <sub>2</sub> O <sub>4</sub> |                             |
| Formula weight                    | 446.44                                                        |                             |
| Temperature                       | 200(2) K                                                      |                             |
| Wavelength                        | 0.71073 Å                                                     |                             |
| Crystal system                    | triclinic                                                     |                             |
| Space group                       | P $\bar{1}$                                                   |                             |
| Z                                 | 2                                                             |                             |
| Unit cell dimensions              | a = 10.0719(6) Å                                              | $\alpha$ = 92.2576(15) deg. |
|                                   | b = 10.5354(7) Å                                              | $\beta$ = 111.1719(14) deg. |
|                                   | c = 10.8948(7) Å                                              | $\gamma$ = 93.0417(15) deg. |
| Volume                            | 1074.38(12) Å <sup>3</sup>                                    |                             |
| Density (calculated)              | 1.38 g/cm <sup>3</sup>                                        |                             |
| Absorption coefficient            | 0.09 mm <sup>-1</sup>                                         |                             |
| Crystal shape                     | brick                                                         |                             |
| Crystal size                      | 0.146 x 0.128 x 0.111 mm <sup>3</sup>                         |                             |
| Crystal colour                    | yellow                                                        |                             |
| Theta range for data collection   | 1.9 to 27.6 deg.                                              |                             |
| Index ranges                      | -12 ≤ h ≤ 12, -13 ≤ k ≤ 12, -13 ≤ l ≤ 14                      |                             |
| Reflections collected             | 14852                                                         |                             |
| Independent reflections           | 4431 (R(int) = 0.0446)                                        |                             |
| Observed reflections              | 2904 (I > 2σ(I))                                              |                             |
| Absorption correction             | Semi-empirical from equivalents                               |                             |
| Max. and min. transmission        | 0.96 and 0.93                                                 |                             |
| Refinement method                 | Full-matrix least-squares on F <sup>2</sup>                   |                             |
| Data/restraints/parameters        | 4431 / 0 / 307                                                |                             |
| Goodness-of-fit on F <sup>2</sup> | 1.01                                                          |                             |
| Final R indices (I > 2σ(I))       | R1 = 0.052, wR2 = 0.103                                       |                             |
| Largest diff. peak and hole       | 0.17 and -0.26 eÅ <sup>-3</sup>                               |                             |

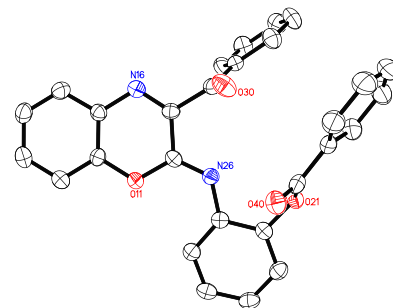

**1a:** yellow crystal (brick), dimensions 0.146 x 0.128 x 0.111 mm<sup>3</sup>, crystal system triclinic, space group P  $\bar{1}$ , Z=2, a=10.0719(6) Å, b=10.5354(7) Å, c=10.8948(7) Å, alpha=92.2576(15) deg, beta=111.1719(14) deg, gamma=93.0417(15) deg, V=1074.38(12) Å<sup>3</sup>, rho=1.380 g/cm<sup>3</sup>, T=200(2) K, Theta<sub>max</sub>= 27.595 deg, radiation MoKα, lambda=0.71073 Å, 0.5 deg omega-scans with CCD area detector, covering the asymmetric unit in reciprocal space with a mean redundancy of 2.98 and a completeness of 88.8% to a resolution of 0.77 Å, 14852 reflections measured, 4431 unique (R(int)=0.0446), 2904 observed (I > 2σ(I)), intensities were corrected for Lorentz and polarization effects, an empirical scaling and absorption correction was applied using SADABS<sup>[1]</sup> based on the Laue symmetry of the reciprocal space, mu=0.09mm<sup>-1</sup>, T<sub>min</sub>=0.93, T<sub>max</sub>=0.96, structure solved with SHELXT-2018/2 (Sheldrick 2015)<sup>[2]</sup> and refined against F<sup>2</sup> with a Full-matrix least-squares algorithm using the SHELXL-2018/3 (Sheldrick, 2018) software<sup>[3]</sup>, 307 parameters refined, hydrogen atoms were treated using appropriate riding models, goodness of fit 1.01 for observed reflections, final residual values R1(F)=0.052, wR(F<sup>2</sup>)=0.103 for observed reflections, residual electron density -0.26 to 0.17 eÅ<sup>-3</sup>. **CCDC 2337430** contains the supplementary crystallographic data for this paper. The data can be obtained free of charge from The Cambridge Crystallographic Data Centre via [www.ccdc.cam.ac.uk/structures](http://www.ccdc.cam.ac.uk/structures).

Lit. 1: (SADABS-2016/2 - Bruker AXS area detector scaling and absorption correction)  
Krause, L., Herbst-Irmer, R., Sheldrick G.M. & Stalke D., J. Appl. Cryst. 48 (2015) 3-10.

Lit. 2: (SHELXT - Integrated space-group and crystal structure determination)  
Sheldrick G. M., Acta Cryst. A71 (2015) 3-8.

Lit. 3: (program SHELXL-2018/3 (Sheldrick, 2018) for structure refinement)  
Sheldrick G. M., Acta Cryst. (2015). C71, 3-8

Lit. APEX, APEX2, SMART, SAINT, SAINT-Plus:  
Bruker (2007). "Program name(s)". Bruker AXS Inc., Madison, Wisconsin, USA.

# Supporting Information

**Table S3.** Crystal data and structure refinement for sba200.

|                                   |                                                 |                       |
|-----------------------------------|-------------------------------------------------|-----------------------|
| Identification code               | sba200                                          |                       |
| Empirical formula                 | C <sub>16</sub> H <sub>13</sub> NO <sub>3</sub> |                       |
| Formula weight                    | 267.27                                          |                       |
| Temperature                       | 200(2) K                                        |                       |
| Wavelength                        | 0.71073 Å                                       |                       |
| Crystal system                    | triclinic                                       |                       |
| Space group                       | P 1                                             |                       |
| Z                                 | 2                                               |                       |
| Unit cell dimensions              | a = 6.7066(7) Å                                 | α = 100.298(2) deg.   |
|                                   | b = 8.7863(9) Å                                 | β = 96.3058(19) deg.  |
|                                   | c = 12.6844(13) Å                               | γ = 111.3892(18) deg. |
| Volume                            | 672.14(12) Å <sup>3</sup>                       |                       |
| Density (calculated)              | 1.32 g/cm <sup>3</sup>                          |                       |
| Absorption coefficient            | 0.09 mm <sup>-1</sup>                           |                       |
| Crystal shape                     | brick                                           |                       |
| Crystal size                      | 0.122 x 0.062 x 0.062 mm <sup>3</sup>           |                       |
| Crystal colour                    | colourless                                      |                       |
| Theta range for data collection   | 1.7 to 29.3 deg.                                |                       |
| Index ranges                      | -9 ≤ h ≤ 9, -12 ≤ k ≤ 12, -17 ≤ l ≤ 17          |                       |
| Reflections collected             | 12848                                           |                       |
| Independent reflections           | 3342 (R(int) = 0.0383)                          |                       |
| Observed reflections              | 2185 (I > 2σ(I))                                |                       |
| Absorption correction             | Semi-empirical from equivalents                 |                       |
| Max. and min. transmission        | 0.96 and 0.92                                   |                       |
| Refinement method                 | Full-matrix least-squares on F <sup>2</sup>     |                       |
| Data/restraints/parameters        | 3342 / 0 / 183                                  |                       |
| Goodness-of-fit on F <sup>2</sup> | 1.04                                            |                       |
| Final R indices (I > 2σ(I))       | R1 = 0.049, wR2 = 0.113                         |                       |
| Largest diff. peak and hole       | 0.20 and -0.20 eÅ <sup>-3</sup>                 |                       |

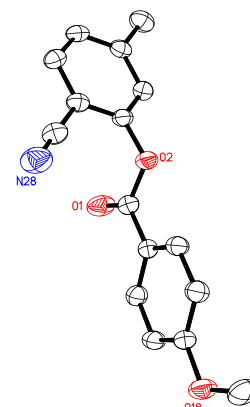

**3b:** colourless crystal (brick), dimensions 0.122 x 0.062 x 0.062 mm<sup>3</sup>, crystal system triclinic, space group P 1, Z=2, a=6.7066(7) Å, b=8.7863(9) Å, c=12.6844(13) Å, alpha=100.298(2) deg, beta=96.3058(19) deg, gamma=111.3892(18) deg, V=672.14(12) Å<sup>3</sup>, rho=1.321 g/cm<sup>3</sup>, T=200(2) K, Theta<sub>max</sub>= 29.291 deg, radiation MoKα, lambda=0.71073 Å, 0.5 deg omega-scans with CCD area detector, covering the asymmetric unit in reciprocal space with a mean redundancy of 3.51 and a completeness of 91.3% to a resolution of 0.73 Å, 12848 reflections measured, 3342 unique (R(int)=0.0383), 2185 observed (I > 2σ(I)), intensities were corrected for Lorentz and polarization effects, an empirical scaling and absorption correction was applied using SADABS<sup>[1]</sup> based on the Laue symmetry of the reciprocal space, mu=0.09mm<sup>-1</sup>, T<sub>min</sub>=0.92, T<sub>max</sub>=0.96, structure solved with SHELXT-2018/2 (Sheldrick 2015)<sup>[2]</sup> and refined against F<sup>2</sup> with a Full-matrix least-squares algorithm using the SHELXL-2018/3 (Sheldrick, 2018) software<sup>[3]</sup>, 183 parameters refined, hydrogen atoms were treated using appropriate riding models, goodness of fit 1.04 for observed reflections, final residual values R1(F)=0.049, wR(F<sup>2</sup>)=0.113 for observed reflections, residual electron density -0.20 to 0.20 eÅ<sup>-3</sup>. **CCDC 2337863** contains the supplementary crystallographic data for this paper. The data can be obtained free of charge from The Cambridge Crystallographic Data Centre via [www.ccdc.cam.ac.uk/structures](http://www.ccdc.cam.ac.uk/structures).

Lit. 1: (SADABS-2016/2 - Bruker AXS area detector scaling and absorption correction)  
Krause, L., Herbst-Irmer, R., Sheldrick G.M. & Stalke D., J. Appl. Cryst. 48 (2015) 3-10.

Lit. 2: (SHELXT - Integrated space-group and crystal structure determination)  
Sheldrick G. M., Acta Cryst. A71 (2015) 3-8.

Lit. 3: (program SHELXL-2018/3 (Sheldrick, 2018) for structure refinement)  
Sheldrick G. M., Acta Cryst. (2015). C71, 3-8

Lit. APEX, APEX2, SMART, SAINT, SAINT-Plus:  
Bruker (2007). "Program name(s)". Bruker AXS Inc., Madison, Wisconsin, USA.

# Supporting Information

## 8. Z-matrices

Re

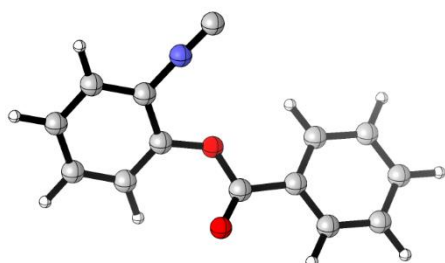

|   |             |             |             |
|---|-------------|-------------|-------------|
| C | -2.24075100 | -1.45525000 | -0.49708000 |
| C | -1.62828700 | -0.23503200 | -0.22088200 |
| C | -2.40578200 | 0.88514200  | 0.11822800  |
| C | -3.79964400 | 0.77823400  | 0.18362500  |
| C | -4.40975000 | -0.44446600 | -0.08440400 |
| C | -3.63108400 | -1.55442000 | -0.42391100 |
| H | -1.63328800 | -2.31260600 | -0.75201400 |
| H | -4.37912700 | 1.65640800  | 0.44444900  |
| H | -5.48978600 | -0.52949300 | -0.03066900 |
| H | -4.10558700 | -2.50708000 | -0.63503700 |
| C | -1.21635000 | 3.10114000  | 0.58537900  |
| O | -0.27154400 | -0.01026800 | -0.33015100 |
| C | 0.64917400  | -0.88940800 | 0.19629900  |
| O | 0.34418100  | -1.93797600 | 0.71880000  |
| C | 2.02885000  | -0.37408100 | 0.03177100  |
| C | 3.08709700  | -1.21309000 | 0.41148200  |
| C | 2.29308400  | 0.91027800  | -0.46765500 |
| C | 4.40217600  | -0.77303800 | 0.28465300  |

|   |             |             |             |
|---|-------------|-------------|-------------|
| H | 2.85952600  | -2.19895600 | 0.80163100  |
| C | 3.61194000  | 1.34576600  | -0.58848500 |
| H | 1.47196800  | 1.55936400  | -0.74580500 |
| C | 4.66554700  | 0.50636100  | -0.21572100 |
| H | 5.22075300  | -1.42344700 | 0.57608700  |
| H | 3.81674700  | 2.34117300  | -0.96928700 |
| H | 5.69120000  | 0.84966900  | -0.31183100 |
| N | -1.78154700 | 2.08887300  | 0.37621300  |

Electronic Energy = -744.171189 Hartree

Thermal Correction to Free Energy = 0.150366 Hartree

Imaginary Freq= 0

---

ReCom

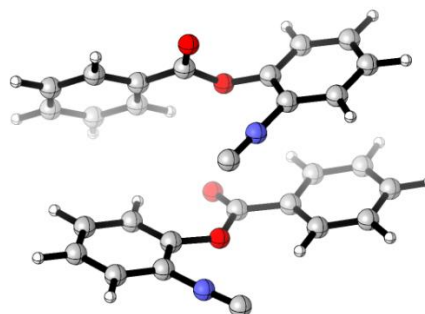

|   |             |             |             |
|---|-------------|-------------|-------------|
| C | -2.66314700 | -1.13728500 | -0.80833800 |
| C | -1.70278300 | -2.03529400 | -0.34622600 |
| C | -2.05012500 | -3.00409400 | 0.61552800  |
| C | -3.35260200 | -3.06458900 | 1.11552200  |
| C | -4.30902600 | -2.15777400 | 0.66262100  |
| C | -3.95954900 | -1.20176300 | -0.29197400 |
| H | -2.39642100 | -0.39716600 | -1.54394700 |
| H | -3.58966300 | -3.81528300 | 1.86063300  |

## Supporting Information

|   |             |             |             |                                                      |             |             |             |
|---|-------------|-------------|-------------|------------------------------------------------------|-------------|-------------|-------------|
| H | -5.31887200 | -2.19805900 | 1.05670500  | H                                                    | -5.10624100 | 2.87028000  | 0.90100200  |
| H | -4.69409700 | -0.48544900 | -0.64398100 | H                                                    | -3.28718100 | 2.20210000  | -2.94400300 |
| C | -0.22056000 | -4.59368100 | 1.42592100  | H                                                    | -5.31605800 | 2.57718600  | -1.55889000 |
| C | 0.17079000  | -0.72074600 | 2.05288800  | O                                                    | -0.37487700 | -2.07466300 | -0.70825900 |
| C | 2.06275300  | 0.83084800  | 1.31473800  | C                                                    | 0.27417500  | -1.15459700 | -1.47908100 |
| C | 1.77790100  | 1.90403600  | 0.45641800  | O                                                    | -0.27963400 | -0.32630500 | -2.17216600 |
| C | 3.37716000  | 0.61520100  | 1.74126000  | C                                                    | 1.74372600  | -1.30560800 | -1.34106700 |
| C | 2.79312800  | 2.75113100  | 0.03153600  | C                                                    | 2.55929900  | -0.37735100 | -2.00339500 |
| C | 4.39366300  | 1.46525800  | 1.31328400  | C                                                    | 2.32045600  | -2.30447000 | -0.54232000 |
| H | 3.57997100  | -0.22475900 | 2.39508300  | C                                                    | 3.94306900  | -0.44503300 | -1.86753800 |
| C | 4.10318200  | 2.53243800  | 0.46015900  | H                                                    | 2.09102300  | 0.39411400  | -2.60413800 |
| H | 2.54235800  | 3.56900100  | -0.63477600 | C                                                    | 3.70701000  | -2.37269200 | -0.41863500 |
| H | 5.41198100  | 1.29070100  | 1.64373400  | H                                                    | 1.68796500  | -3.01004300 | -0.01834000 |
| H | 4.89451200  | 3.19560100  | 0.12642700  | C                                                    | 4.51812900  | -1.44431400 | -1.07704500 |
| O | 0.50622000  | 2.07469700  | -0.05771400 | H                                                    | 4.57201400  | 0.28322800  | -2.36911200 |
| C | -0.50956400 | 2.44442300  | 0.80233800  | H                                                    | 4.15245200  | -3.14724800 | 0.19760200  |
| O | -0.31306400 | 2.71035200  | 1.96506200  | H                                                    | 5.59752400  | -1.49506800 | -0.96925700 |
| C | -1.82019800 | 2.47184500  | 0.11173400  | N                                                    | -1.08503100 | -3.87934100 | 1.06742300  |
| C | -2.96419500 | 2.68295200  | 0.89466300  | N                                                    | 1.05039000  | -0.01219100 | 1.71860400  |
| C | -1.93697800 | 2.29513300  | -1.27397600 | Electronic Energy = -1488.362072 Hartree             |             |             |             |
| C | -4.22008000 | 2.71463100  | 0.29386000  | Thermal Correction to Free Energy = 0.323522 Hartree |             |             |             |
| H | -2.84918500 | 2.81187700  | 1.96513600  | Imaginary Freq= 0                                    |             |             |             |
| C | -3.19637400 | 2.33914800  | -1.87104800 | <hr/>                                                |             |             |             |
| H | -1.05364900 | 2.10050200  | -1.86809000 | INT <sub>Trans</sub>                                 |             |             |             |
| C | -4.33678100 | 2.54667200  | -1.09005200 |                                                      |             |             |             |



## Supporting Information

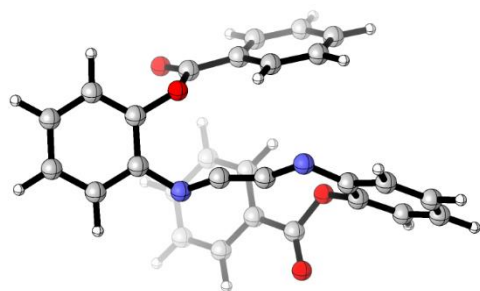

|   |             |             |             |
|---|-------------|-------------|-------------|
| C | -4.72253200 | -0.80891000 | 0.32015000  |
| C | -3.41659800 | -0.62934900 | -0.11682700 |
| C | -3.14331600 | -0.20953600 | -1.43498100 |
| C | -4.22517000 | 0.04651000  | -2.29249200 |
| C | -5.53354600 | -0.16665900 | -1.86864000 |
| C | -5.78452100 | -0.59335000 | -0.56017300 |
| H | -4.89076200 | -1.12195900 | 1.34466600  |
| H | -4.00679200 | 0.39903300  | -3.29505800 |
| H | -6.35767200 | 0.01210100  | -2.55150500 |
| H | -6.80352500 | -0.75010500 | -0.22170000 |
| C | -0.82760900 | -0.53457600 | -1.52208000 |
| C | 0.43009200  | -0.80008900 | -1.41480900 |
| C | 2.76276500  | -0.94701900 | -1.32458400 |
| C | 3.12341400  | 0.41541300  | -1.28773400 |
| C | 3.77104500  | -1.90020100 | -1.53399700 |
| C | 4.43983400  | 0.81515500  | -1.47669800 |
| C | 5.08607100  | -1.50189100 | -1.75643900 |
| H | 3.49010200  | -2.94783700 | -1.52970800 |
| C | 5.42255100  | -0.14452600 | -1.72709300 |
| H | 4.68399900  | 1.86937200  | -1.41827000 |
| H | 5.85155600  | -2.24906500 | -1.93881500 |

|   |             |             |             |
|---|-------------|-------------|-------------|
| H | 6.44974600  | 0.16808100  | -1.88354800 |
| O | 2.11765000  | 1.34282900  | -1.04435300 |
| C | 2.07575400  | 1.94043000  | 0.19684400  |
| O | 2.99152100  | 1.88339600  | 0.98708200  |
| C | 0.77170100  | 2.60174500  | 0.43875700  |
| C | 0.55656400  | 3.18430600  | 1.69708300  |
| C | -0.25604600 | 2.59062700  | -0.51421000 |
| C | -0.68483200 | 3.73497200  | 2.00409800  |
| H | 1.36467000  | 3.18382200  | 2.42028000  |
| C | -1.49870900 | 3.13876500  | -0.20004100 |
| H | -0.09048900 | 2.13615900  | -1.48130000 |
| C | -1.71568900 | 3.70671500  | 1.05767500  |
| H | -0.85354100 | 4.17801200  | 2.98051500  |
| H | -2.29788200 | 3.10555300  | -0.93297000 |
| H | -2.68745700 | 4.12431600  | 1.30328700  |
| O | -2.36739400 | -0.73446300 | 0.78203800  |
| C | -1.74126600 | -1.95790800 | 0.92274600  |
| O | -2.21341400 | -2.98289500 | 0.48707100  |
| C | -0.45415500 | -1.82137200 | 1.64091700  |
| C | 0.30857900  | -2.97899500 | 1.84237300  |
| C | 0.04422400  | -0.57196400 | 2.03977100  |
| C | 1.56556800  | -2.88744000 | 2.43503600  |
| H | -0.08929700 | -3.93163800 | 1.51096400  |
| C | 1.30417600  | -0.48578200 | 2.62762400  |
| H | -0.54168900 | 0.32208200  | 1.86702600  |

## Supporting Information

|   |             |             |             |
|---|-------------|-------------|-------------|
| C | 2.06657100  | -1.64114400 | 2.82180600  |
| H | 2.16062800  | -3.78337500 | 2.58193000  |
| H | 1.70420200  | 0.48125800  | 2.91047400  |
| H | 3.05485100  | -1.56635600 | 3.26516000  |
| N | -1.85447500 | 0.08076100  | -1.90338800 |
| N | 1.46632100  | -1.40418400 | -1.05527200 |

Electronic Energy = -1488.358498 Hartree

Thermal Correction to Free Energy = 0.328208 Hartree

Imaginary Freq= 0

---

**INT<sub>Cis</sub>**

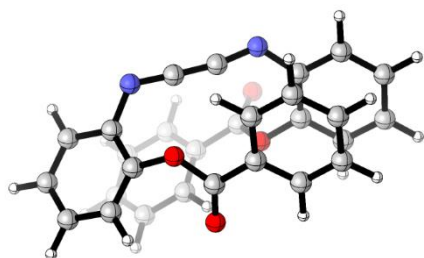

|   |             |             |             |
|---|-------------|-------------|-------------|
| C | -2.89330800 | -2.43502500 | -0.71514400 |
| C | -2.04248200 | -1.85007800 | 0.21714200  |
| C | -2.54982800 | -1.09417900 | 1.29525000  |
| C | -3.94038200 | -0.94918700 | 1.41162700  |
| C | -4.79365200 | -1.49247800 | 0.45718600  |
| C | -4.27084700 | -2.23975500 | -0.60294900 |
| H | -2.47483600 | -3.02187800 | -1.52252400 |
| H | -4.32099600 | -0.38792800 | 2.25790500  |
| H | -5.86548700 | -1.34930900 | 0.54747300  |
| H | -4.93388800 | -2.68321800 | -1.33893400 |
| C | -0.58850900 | -0.13095700 | 2.14296200  |

|   |             |            |             |
|---|-------------|------------|-------------|
| C | 0.57858000  | 0.35394300 | 2.00433600  |
| C | 2.52968300  | 1.14300400 | 0.96196600  |
| C | 2.04952800  | 1.43678000 | -0.33228400 |
| C | 3.91396100  | 1.22959800 | 1.18589500  |
| C | 2.92020800  | 1.78019200 | -1.35741500 |
| C | 4.79226500  | 1.54699200 | 0.15556900  |
| H | 4.27019100  | 1.02790400 | 2.19028100  |
| C | 4.29530300  | 1.82421100 | -1.12106100 |
| H | 2.50561100  | 2.00694300 | -2.33376500 |
| H | 5.85911000  | 1.59147400 | 0.34875200  |
| H | 4.97132300  | 2.08673600 | -1.92848900 |
| O | 0.69544700  | 1.36715800 | -0.62986500 |
| C | -0.11926000 | 2.35999500 | -0.12183600 |
| O | 0.31347200  | 3.28337500 | 0.52964900  |
| C | -1.54220900 | 2.13535400 | -0.46118200 |
| C | -2.49658300 | 2.94486800 | 0.17327900  |
| C | -1.94639600 | 1.16116600 | -1.38431900 |
| C | -3.84870500 | 2.77570700 | -0.11184100 |
| H | -2.16039100 | 3.69111200 | 0.88461700  |
| C | -3.30101800 | 1.00708000 | -1.67439900 |
| H | -1.21339400 | 0.52605800 | -1.86414400 |
| C | -4.25115000 | 1.80821000 | -1.03887900 |
| H | -4.58800700 | 3.39532100 | 0.38605500  |
| H | -3.61165500 | 0.24659700 | -2.38204900 |
| H | -5.30608700 | 1.67484000 | -1.25906300 |

## Supporting Information

|                                                                                     |             |             |             |   |             |             |             |
|-------------------------------------------------------------------------------------|-------------|-------------|-------------|---|-------------|-------------|-------------|
| O                                                                                   | -0.67734100 | -2.08600300 | 0.22332700  | C | 4.17458800  | -0.48851800 | 0.59662400  |
| C                                                                                   | 0.10058200  | -1.89083900 | -0.88523300 | C | 3.53589900  | -1.13438000 | -0.61219600 |
| O                                                                                   | -0.34720700 | -1.62286800 | -1.98047600 | C | 4.40499900  | -1.64226200 | -1.65702500 |
| C                                                                                   | 1.53753900  | -2.03399700 | -0.55544800 | C | 5.74696500  | -1.44026300 | -1.62327900 |
| C                                                                                   | 2.47121900  | -1.73446100 | -1.55698400 | C | 6.35691200  | -0.75219700 | -0.50679200 |
| C                                                                                   | 1.97678400  | -2.41774300 | 0.72025500  | H | 6.07452400  | 0.19125100  | 1.39717100  |
| C                                                                                   | 3.83376900  | -1.80996100 | -1.28326400 | H | 3.92069600  | -2.15403500 | -2.48233900 |
| H                                                                                   | 2.10999600  | -1.42848000 | -2.53224800 | H | 6.37788100  | -1.79489000 | -2.43195300 |
| C                                                                                   | 3.34181700  | -2.49682900 | 0.98716400  | H | 7.43281800  | -0.59854500 | -0.51788000 |
| H                                                                                   | 1.25271000  | -2.64303900 | 1.49278500  | C | 1.29343900  | -0.84589900 | 0.06671500  |
| C                                                                                   | 4.26999300  | -2.18964400 | -0.01099800 | C | 0.15612900  | -1.57503300 | 0.18783400  |
| H                                                                                   | 4.55488900  | -1.55963200 | -2.05426100 | C | -2.02125700 | -2.62736700 | 0.03315300  |
| H                                                                                   | 3.68064500  | -2.78488900 | 1.97708100  | C | -2.77225400 | -1.70349400 | -0.71386400 |
| H                                                                                   | 5.33294700  | -2.23754200 | 0.20480600  | C | -2.58753000 | -3.85947500 | 0.38132600  |
| N                                                                                   | -1.75143600 | -0.57048600 | 2.32395200  | C | -4.06818600 | -2.01421600 | -1.11571600 |
| N                                                                                   | 1.73728600  | 0.83674900  | 2.07437600  | C | -3.87973900 | -4.17420300 | -0.02831600 |
| Electronic Energy = -1488.364009 Hartree                                            |             |             |             | H | -1.99320500 | -4.55219000 | 0.96672000  |
| Thermal Correction to Free Energy = 0.331069 Hartree                                |             |             |             | C | -4.61791800 | -3.25017700 | -0.77430800 |
| Imaginary Freq= 0                                                                   |             |             |             | H | -4.63704800 | -1.28856300 | -1.68308700 |
| <hr/>                                                                               |             |             |             | H | -4.31208500 | -5.13283700 | 0.23748900  |
| <b>INT<sub>γ</sub></b>                                                              |             |             |             | H | -5.62818000 | -3.48809200 | -1.09068300 |
| 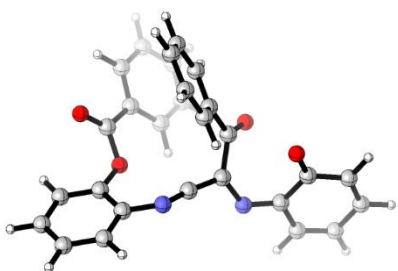 |             |             |             | O | -2.14778400 | -0.52548700 | -1.07311100 |
|                                                                                     |             |             |             | C | -2.76124000 | 0.68371800  | -0.78307600 |
|                                                                                     |             |             |             | O | -3.81150300 | 0.75448800  | -0.18813800 |
|                                                                                     |             |             |             | C | -1.96825500 | 1.82715200  | -1.28160600 |
| C                                                                                   | 5.62393000  | -0.31331500 | 0.54900500  |   |             |             |             |

## Supporting Information

|   |             |             |             |
|---|-------------|-------------|-------------|
| C | -2.47019800 | 3.11554300  | -1.04078500 |
| C | -0.74258900 | 1.66084500  | -1.94006700 |
| C | -1.74360300 | 4.22904100  | -1.45003000 |
| H | -3.41684500 | 3.21956500  | -0.52266100 |
| C | -0.01421700 | 2.78018600  | -2.33869000 |
| H | -0.35007300 | 0.66668000  | -2.11170900 |
| C | -0.51209300 | 4.06171100  | -2.09505500 |
| H | -2.12832900 | 5.22626000  | -1.26076200 |
| H | 0.95179100  | 2.64865700  | -2.81300400 |
| H | 0.06233800  | 4.93141300  | -2.39914100 |
| O | 3.51624600  | -0.19027500 | 1.59954100  |
| C | 1.28238200  | 0.59202600  | 0.51063800  |
| O | 1.94240200  | 1.41653300  | -0.10563300 |
| C | 0.35065500  | 0.98721900  | 1.60171300  |
| C | -0.22363000 | 2.26577000  | 1.55528900  |
| C | 0.04762800  | 0.12576300  | 2.66519200  |
| C | -1.12354600 | 2.66252700  | 2.54059300  |
| H | 0.03441100  | 2.92425200  | 0.73414600  |
| C | -0.84080800 | 0.53252800  | 3.66035800  |
| H | 0.53022900  | -0.84327800 | 2.72815700  |
| C | -1.43625400 | 1.79507400  | 3.59244300  |
| H | -1.58482800 | 3.64380200  | 2.48806300  |
| H | -1.06586300 | -0.13249700 | 4.48826800  |
| H | -2.13914900 | 2.10446300  | 4.36013900  |
| N | 2.26110700  | -1.39985100 | -0.73747000 |

|   |             |             |            |
|---|-------------|-------------|------------|
| N | -0.72756700 | -2.34348200 | 0.47623300 |
|---|-------------|-------------|------------|

Electronic Energy = -1488.354907 Hartree

Thermal Correction to Free Energy = 0.328090 Hartree

Imaginary Freq= 0

---

Prz

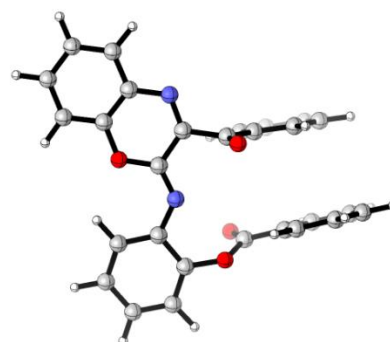

|   |             |             |             |
|---|-------------|-------------|-------------|
| C | -5.27144000 | -0.04864200 | 0.23844900  |
| C | -3.96122800 | -0.41757100 | -0.04592000 |
| C | -3.60399300 | -1.75559600 | -0.27753500 |
| C | -4.60153300 | -2.73898200 | -0.21445600 |
| C | -5.91704900 | -2.38550700 | 0.07057200  |
| C | -6.24938300 | -1.04234300 | 0.29557000  |
| H | -5.50742700 | 0.99577300  | 0.41081700  |
| H | -4.31132400 | -3.76818800 | -0.39687000 |
| H | -6.68587400 | -3.14937600 | 0.11726500  |
| H | -7.27537300 | -0.76669900 | 0.51689700  |
| C | -1.41191600 | -1.16785400 | -0.62722400 |
| C | -1.69205900 | 0.24443300  | -0.36092800 |
| C | -0.77671000 | 2.44848100  | -0.10759700 |
| C | 0.47693600  | 3.10051700  | -0.11345600 |
| C | -1.91819600 | 3.24178800  | 0.13469100  |

## Supporting Information

|   |             |             |             |
|---|-------------|-------------|-------------|
| C | 0.60078800  | 4.46387400  | 0.10509400  |
| C | -1.79755700 | 4.61331700  | 0.35289800  |
| H | -2.89368200 | 2.77883700  | 0.14340400  |
| C | -0.54394400 | 5.22894400  | 0.33948300  |
| H | 1.58935300  | 4.90927600  | 0.08857200  |
| H | -2.69046400 | 5.20355000  | 0.53393300  |
| H | -0.45462900 | 6.29674900  | 0.51131900  |
| O | 1.61831100  | 2.37546000  | -0.42349600 |
| C | 2.10475500  | 1.50382100  | 0.51701400  |
| O | 1.70814800  | 1.47228100  | 1.66109300  |
| C | 3.19480400  | 0.66721400  | -0.04246600 |
| C | 4.10604900  | 0.08593800  | 0.84821000  |
| C | 3.32258500  | 0.45154200  | -1.42145600 |
| C | 5.15875700  | -0.68399900 | 0.35965400  |
| H | 3.97458600  | 0.24814400  | 1.91215000  |
| C | 4.36499700  | -0.33874700 | -1.90295300 |
| H | 2.59684200  | 0.88317100  | -2.09972200 |
| C | 5.28981000  | -0.89633400 | -1.01563100 |
| H | 5.87073600  | -1.12608200 | 1.04965100  |
| H | 4.45423800  | -0.51974600 | -2.96943400 |
| H | 6.10706100  | -1.50276100 | -1.39514000 |
| O | -3.00421800 | 0.57215200  | -0.09228200 |
| C | 0.00321700  | -1.54177400 | -1.05061700 |
| O | 0.28547700  | -1.46660300 | -2.23608300 |
| C | 0.93064900  | -2.04955900 | -0.01500200 |

|   |             |             |             |
|---|-------------|-------------|-------------|
| C | 2.08537600  | -2.73807100 | -0.41787500 |
| C | 0.67539100  | -1.85235100 | 1.34888100  |
| C | 2.96148900  | -3.24128000 | 0.53651600  |
| H | 2.27227500  | -2.86495500 | -1.47809000 |
| C | 1.56729200  | -2.33872900 | 2.30291900  |
| H | -0.20093400 | -1.29781300 | 1.66548300  |
| C | 2.70352500  | -3.04176200 | 1.89761700  |
| H | 3.85230700  | -3.77660100 | 0.22480300  |
| H | 1.37849400  | -2.16467500 | 3.35716100  |
| H | 3.39493200  | -3.42697200 | 2.64131300  |
| N | -2.28755300 | -2.11318800 | -0.57130500 |
| N | -0.73263700 | 1.08424800  | -0.35927800 |

Electronic Energy = -1488.424466 Hartree

Thermal Correction to Free Energy = 0.333645 Hartree

Imaginary Freq= 0

---

PrE

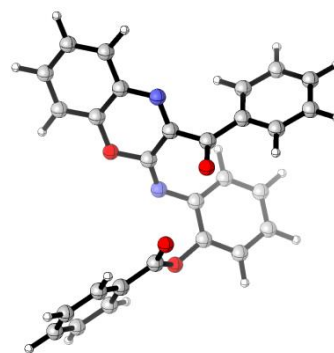

|   |             |            |             |
|---|-------------|------------|-------------|
| C | -0.11266800 | 4.55623700 | -0.82186500 |
| C | 0.41098400  | 3.30731400 | -0.49698900 |
| C | 1.69826800  | 3.17339500 | 0.04805600  |

## Supporting Information

|   |             |             |             |   |             |             |             |
|---|-------------|-------------|-------------|---|-------------|-------------|-------------|
| C | 2.48213200  | 4.32113200  | 0.24105800  | C | -5.92371300 | 0.48507000  | 1.60403900  |
| C | 1.97982600  | 5.57143000  | -0.10224300 | H | -4.00005600 | 0.01287400  | 2.47901800  |
| C | 0.68220900  | 5.68487000  | -0.62529100 | C | -6.22732700 | -0.23917800 | -0.68802900 |
| H | -1.11536500 | 4.62248700  | -1.22922300 | H | -4.54740400 | -1.26308500 | -1.57743900 |
| H | 3.47001200  | 4.19825800  | 0.67235200  | C | -6.72013400 | 0.39106000  | 0.45811400  |
| H | 2.58464900  | 6.45975400  | 0.04496300  | H | -6.30547400 | 0.97564800  | 2.49404900  |
| H | 0.28805200  | 6.66246900  | -0.88391500 | H | -6.84418100 | -0.30860800 | -1.57867500 |
| C | 1.43079600  | 0.88581100  | 0.23685200  | H | -7.72233400 | 0.80943400  | 0.45821200  |
| C | 0.16070300  | 0.93496500  | -0.53704400 | O | -0.35752300 | 2.20225100  | -0.71972400 |
| C | -0.15526200 | -1.32909000 | -1.11133700 | C | 1.83483700  | -0.36947700 | 0.99218400  |
| C | -1.13367900 | -2.30827400 | -0.85360300 | O | 1.03222600  | -0.80215500 | 1.80159000  |
| C | 1.11251900  | -1.76532400 | -1.52943400 | C | 3.18312000  | -0.96414200 | 0.79309700  |
| C | -0.83573200 | -3.66195400 | -0.91846000 | C | 3.50491700  | -2.10827900 | 1.53898100  |
| C | 1.41637500  | -3.12361300 | -1.60586900 | C | 4.10523100  | -0.46020400 | -0.13563400 |
| H | 1.85111100  | -1.02698500 | -1.81975300 | C | 4.73101600  | -2.74100700 | 1.35660900  |
| C | 0.44827300  | -4.07621400 | -1.28554600 | H | 2.77313500  | -2.48835600 | 2.24330000  |
| H | -1.61806100 | -4.37801000 | -0.69123300 | C | 5.33318600  | -1.09582400 | -0.31686700 |
| H | 2.40910200  | -3.43163200 | -1.91786500 | H | 3.86806600  | 0.42824300  | -0.70816000 |
| H | 0.68006700  | -5.13494000 | -1.33678800 | C | 5.64733000  | -2.23654400 | 0.42685400  |
| O | -2.45071700 | -1.92916800 | -0.63119500 | H | 4.97369200  | -3.62831100 | 1.93309100  |
| C | -2.76282000 | -1.23355400 | 0.51073000  | H | 6.04441300  | -0.70116100 | -1.03582000 |
| O | -2.00002400 | -1.11485100 | 1.44057700  | H | 6.60326300  | -2.73133900 | 0.28311800  |
| C | -4.14324200 | -0.68625200 | 0.45657800  | N | 2.15973400  | 1.92938300  | 0.46153800  |
| C | -4.63768300 | -0.05069500 | 1.60403300  | N | -0.53058700 | 0.00971800  | -1.06711400 |
| C | -4.94086500 | -0.77816800 | -0.69233600 |   |             |             |             |

Electronic Energy = -1488.409252 Hartree

## Supporting Information

Thermal Correction to Free Energy = 0.331456 Hartree

Imaginary Freq= 0

**TS1<sub>cis</sub>**

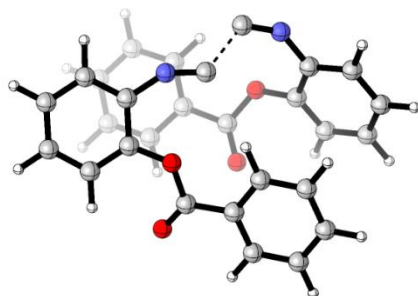

|   |             |             |             |   |             |             |             |
|---|-------------|-------------|-------------|---|-------------|-------------|-------------|
| H | -3.99700200 | -1.37819700 | -2.12033500 | H | -2.98462300 | 3.12020100  | -0.26199600 |
| C | -4.53531800 | 1.75119500  | -0.88956000 | H | -5.86548300 | 0.19305600  | -1.56945700 |
| H | -5.33648500 | 2.44252700  | -0.64796600 | H | -5.33648500 | 2.44252700  | -0.64796600 |
| O | -0.83832900 | 1.54081700  | -0.86840800 | O | -0.83832900 | 1.54081700  | -0.86840800 |
| C | -0.29560700 | 2.41599500  | 0.04887000  | C | -0.29560700 | 2.41599500  | 0.04887000  |
| O | -0.95922900 | 3.04036800  | 0.84668900  | O | -0.95922900 | 3.04036800  | 0.84668900  |
| C | 3.20448700  | -1.07749300 | 1.31811300  | C | 1.17663600  | 2.47184500  | -0.09147300 |
| C | 2.23660200  | -1.68988300 | 0.52599400  | C | 1.87684900  | 3.34603600  | 0.75063500  |
| C | 2.57713300  | -2.24096600 | -0.72531500 | C | 1.87365200  | 1.65905000  | -0.99763200 |
| C | 3.90428800  | -2.17000900 | -1.16511300 | C | 3.26656500  | 3.40954400  | 0.68419900  |
| C | 4.86713600  | -1.53273100 | -0.38519700 | H | 1.31977000  | 3.95447800  | 1.45419200  |
| C | 4.51777700  | -0.99160500 | 0.85420900  | C | 3.26334600  | 1.72309800  | -1.05552200 |
| H | 2.92246000  | -0.65518100 | 2.27230400  | H | 1.33365800  | 0.96272600  | -1.62666500 |
| H | 4.15635500  | -2.61820400 | -2.11989300 | C | 3.96082000  | 2.59688500  | -0.21768700 |
| H | 5.89063400  | -1.46973800 | -0.74071100 | H | 3.80876700  | 4.08550800  | 1.33804400  |
| H | 5.26576500  | -0.49967800 | 1.46702500  | H | 3.80148100  | 1.07472800  | -1.73845200 |
| C | 0.51434400  | -2.71152100 | -1.96745800 | H | 5.04514200  | 2.63914800  | -0.26163400 |
| C | -0.27294800 | -1.11106600 | -1.82670800 | O | 0.92240300  | -1.87732100 | 0.92951500  |
| C | -2.47310900 | -0.01013100 | -1.51042300 | C | 0.19427700  | -0.86063100 | 1.48899900  |
| C | -2.17903300 | 1.26471600  | -0.97737000 | O | 0.67876500  | 0.18802900  | 1.85580400  |
| C | -3.80148000 | -0.38972200 | -1.72093300 | C | -1.24744500 | -1.19838000 | 1.55640200  |
| C | -3.21348700 | 2.14841700  | -0.67353900 | C | -2.12349800 | -0.20571400 | 2.01966900  |
| C | -4.83452100 | 0.48977300  | -1.40884600 | C | -1.74983200 | -2.43472900 | 1.12459200  |

## Supporting Information

|   |             |             |             |   |             |             |             |
|---|-------------|-------------|-------------|---|-------------|-------------|-------------|
| C | -3.49446300 | -0.44825000 | 2.04850900  | C | 4.66490900  | -3.42729100 | -0.35457400 |
| H | -1.71815100 | 0.75114400  | 2.32898200  | H | 5.04004000  | -1.40709100 | 0.31881600  |
| C | -3.12215600 | -2.67319400 | 1.16360400  | H | 1.56615700  | -4.78542800 | -0.77812800 |
| H | -1.07039500 | -3.18937700 | 0.74835100  | H | 3.98285800  | -5.37208900 | -0.99511000 |
| C | -3.99443000 | -1.68145700 | 1.62217400  | H | 5.71803300  | -3.67684300 | -0.43252300 |
| H | -4.17178200 | 0.32794100  | 2.38885300  | C | -0.14777900 | -1.58155200 | -0.44614300 |
| H | -3.51174700 | -3.62835500 | 0.82587100  | C | 0.36091300  | -0.37145000 | -1.56724300 |
| H | -5.06425700 | -1.86673700 | 1.63819500  | C | -0.70497200 | 1.91243000  | -1.43047700 |
| N | 1.61704500  | -2.89265300 | -1.48861700 | C | -2.02999400 | 1.82649800  | -0.97249400 |
| N | -1.45025800 | -0.88957000 | -1.80319300 | C | -0.12602800 | 3.17068700  | -1.63708900 |

Electronic Energy = -1488.328381 Hartree

Thermal Correction to Free Energy = 0.327668 Hartree

Imaginary Freq= -409.60

**TS1<sub>Trans</sub>**

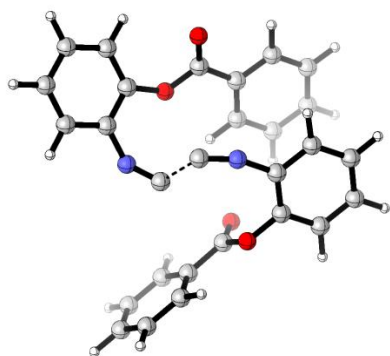

|   |            |             |             |   |             |             |             |
|---|------------|-------------|-------------|---|-------------|-------------|-------------|
| C | 4.29462800 | -2.15017500 | 0.07054300  | C | -2.17364900 | 4.22942500  | -0.91215200 |
| C | 2.94364700 | -1.82203500 | 0.15758300  | H | -3.78231700 | 2.88198900  | -0.36164900 |
| C | 1.95547900 | -2.77326000 | -0.16101200 | H | -0.39716800 | 5.29583200  | -1.51552300 |
| C | 2.33992500 | -4.05860900 | -0.55684100 | H | -2.74530300 | 5.12827500  | -0.70505800 |
| C | 3.69125300 | -4.37867500 | -0.67007400 | O | -2.62083300 | 0.57949600  | -0.84313600 |
|   |            |             |             | C | -2.62500700 | 0.00004200  | 0.40748800  |
|   |            |             |             | O | -2.15916000 | 0.55398500  | 1.37894400  |
|   |            |             |             | C | -3.28374500 | -1.32514200 | 0.39974000  |
|   |            |             |             | C | -3.35386100 | -2.02430800 | 1.61214400  |
|   |            |             |             | C | -3.81958100 | -1.88619100 | -0.76756900 |
|   |            |             |             | C | -3.95586100 | -3.27931200 | 1.65663400  |
|   |            |             |             | H | -2.92500300 | -1.57481400 | 2.50067300  |



## Supporting Information

|   |             |             |             |
|---|-------------|-------------|-------------|
| C | -4.42276300 | -3.14159500 | -0.71736500 |
| H | -3.75095400 | -1.34443200 | -1.70287000 |
| C | -4.49100200 | -3.83914200 | 0.49231400  |
| H | -4.00510400 | -3.82251200 | 2.59505700  |
| H | -4.83512500 | -3.57838000 | -1.62148400 |
| H | -4.95834500 | -4.81872300 | 0.52704900  |
| O | 2.48097600  | -0.61334600 | 0.65636000  |
| C | 3.00976600  | 0.58670100  | 0.26009700  |
| O | 3.98257900  | 0.69119000  | -0.45536600 |
| C | 2.23280000  | 1.72250400  | 0.81740700  |
| C | 2.75849400  | 3.01360100  | 0.65571500  |
| C | 0.99348300  | 1.54488200  | 1.44853300  |
| C | 2.05402800  | 4.11554100  | 1.13348300  |
| H | 3.71397300  | 3.13011900  | 0.15586300  |
| C | 0.28388800  | 2.65320400  | 1.90890400  |
| H | 0.57111200  | 0.55397500  | 1.55419900  |
| C | 0.81493200  | 3.93563000  | 1.75817200  |
| H | 2.46519900  | 5.11335800  | 1.01405800  |
| H | -0.69133700 | 2.50415300  | 2.35751700  |
| H | 0.25877100  | 4.79706100  | 2.11582100  |
| N | 0.60988400  | -2.44128400 | -0.03533800 |
| N | 0.03812000  | 0.77540000  | -1.66878400 |

Electronic Energy = -1488.326944 Hartree

Thermal Correction to Free Energy = 0.326357 Hartree

Imaginary Freq= -440.23

TS<sub>Rot</sub>

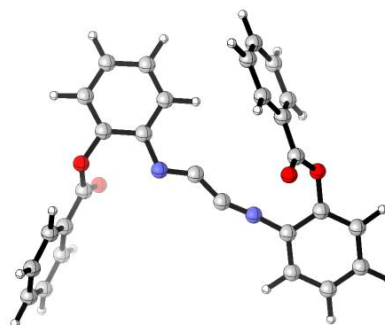

|   |             |             |             |
|---|-------------|-------------|-------------|
| C | 5.36981600  | -2.69586500 | -0.21579500 |
| C | 4.21527200  | -1.92916200 | -0.20977500 |
| C | 2.93824700  | -2.53309300 | -0.30185500 |
| C | 2.85647300  | -3.93342100 | -0.40981800 |
| C | 4.01878000  | -4.69898700 | -0.44102900 |
| C | 5.27175100  | -4.08515300 | -0.33861800 |
| H | 6.33057800  | -2.19956300 | -0.13528500 |
| H | 1.87590500  | -4.39120400 | -0.47809800 |
| H | 3.94789500  | -5.77766900 | -0.53409300 |
| H | 6.17481900  | -4.68644700 | -0.35065600 |
| C | 0.83507300  | -1.09598500 | -0.16994000 |
| C | 0.05612100  | -0.01005600 | -0.23174000 |
| C | -1.51172500 | 1.67347500  | -0.13564000 |
| C | -0.61026900 | 2.72466300  | -0.38024300 |
| C | -2.88117900 | 1.97980000  | -0.04164400 |
| C | -1.06459700 | 4.03096200  | -0.51714300 |
| C | -3.34454500 | 3.28216400  | -0.18596900 |
| C | -2.43317200 | 4.31318300  | -0.42078000 |
| H | -0.35364900 | 4.83189300  | -0.69461000 |

## Supporting Information

|   |             |             |             |
|---|-------------|-------------|-------------|
| H | -4.40987000 | 3.47128800  | -0.11291400 |
| H | -2.79058800 | 5.33247100  | -0.52810400 |
| N | 1.84933100  | -1.73128800 | -0.30430200 |
| N | -1.13200800 | 0.33753100  | 0.07246500  |
| H | 0.44648400  | 2.48906400  | -0.44070600 |
| O | -3.79473800 | 0.98208400  | 0.26332200  |
| C | -3.99099600 | -0.01641800 | -0.65962800 |
| O | -3.58761500 | 0.04926600  | -1.79883200 |
| C | -4.77971100 | -1.13855000 | -0.09167300 |
| C | -5.18279400 | -2.16156600 | -0.96129500 |
| C | -5.11126100 | -1.20373500 | 1.26874400  |
| C | -5.91820400 | -3.23987500 | -0.47432800 |
| H | -4.90955700 | -2.09309000 | -2.00852100 |
| C | -5.84565100 | -2.28641300 | 1.75201900  |
| H | -4.78696300 | -0.41380800 | 1.93518700  |
| C | -6.25060000 | -3.30331800 | 0.88280100  |
| H | -6.23135200 | -4.03029700 | -1.14934200 |
| H | -6.09940200 | -2.33848600 | 2.80621400  |
| H | -6.82259900 | -4.14484200 | 1.26229600  |
| O | 4.30358700  | -0.54920500 | -0.20086900 |
| C | 3.71436300  | 0.12903100  | 0.84999700  |
| O | 3.46067800  | -0.40674100 | 1.90439400  |
| C | 3.44183700  | 1.54562700  | 0.51491600  |
| C | 2.94031700  | 2.37222000  | 1.53119200  |
| C | 3.61822000  | 2.05287000  | -0.77999100 |

|   |            |            |             |
|---|------------|------------|-------------|
| C | 2.62727200 | 3.70076900 | 1.25553400  |
| H | 2.79421400 | 1.95415600 | 2.52087000  |
| C | 3.30160800 | 3.38380300 | -1.05099500 |
| H | 3.98817500 | 1.40312000 | -1.56358300 |
| C | 2.80991300 | 4.20806900 | -0.03494900 |
| H | 2.23261900 | 4.33749400 | 2.04066000  |
| H | 3.43198500 | 3.77535500 | -2.05478100 |
| H | 2.56258500 | 5.24339000 | -0.24992500 |

Electronic Energy = -1488.333713 Hartree

Thermal Correction to Free Energy = 0.324999 Hartree

Imaginary Freq= -175.25

---

**TS<sub>Acylshift</sub>**

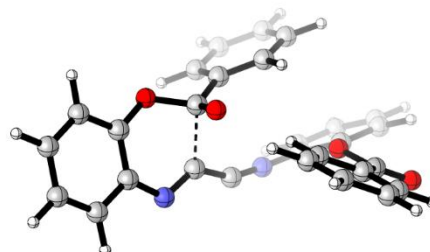

|   |            |             |             |
|---|------------|-------------|-------------|
| C | 5.26620100 | -0.48089700 | 0.75772500  |
| C | 3.99509600 | -0.52680900 | 0.18246200  |
| C | 3.77911600 | 0.02469100  | -1.10575100 |
| C | 4.85383400 | 0.63964900  | -1.77755400 |
| C | 6.10887100 | 0.70692500  | -1.19126200 |
| C | 6.31260600 | 0.13548500  | 0.07563000  |
| H | 5.40598500 | -0.91895200 | 1.73990900  |
| H | 4.66142600 | 1.05001000  | -2.76346100 |
| H | 6.93017900 | 1.18886200  | -1.71082900 |

## Supporting Information

|   |             |             |             |                                                      |             |             |             |
|---|-------------|-------------|-------------|------------------------------------------------------|-------------|-------------|-------------|
| H | 7.29513400  | 0.17869500  | 0.53571400  | H                                                    | 1.08977300  | 3.57305200  | 1.22215600  |
| C | 1.54959500  | -0.51401700 | -1.13112500 | H                                                    | 0.20965800  | 5.91229500  | 1.16197000  |
| C | 0.26952900  | -0.76452600 | -1.58214300 | O                                                    | 3.00560000  | -1.18255400 | 0.83636200  |
| C | -2.13736000 | -1.48583700 | -1.22103300 | C                                                    | 1.68389000  | -0.55621000 | 0.82751900  |
| C | -2.95973200 | -0.54147700 | -0.57216200 | O                                                    | 1.60249700  | 0.63297300  | 1.16142800  |
| C | -2.63672000 | -2.75302200 | -1.55079800 | C                                                    | 0.66843600  | -1.58910800 | 1.23107000  |
| C | -4.27540500 | -0.86814200 | -0.25965000 | C                                                    | -0.48559200 | -1.15116300 | 1.88787000  |
| C | -3.95387400 | -3.07053500 | -1.23578800 | C                                                    | 0.80153900  | -2.94264500 | 0.89543500  |
| H | -1.97957200 | -3.46674100 | -2.03350400 | C                                                    | -1.50452000 | -2.05384700 | 2.19683200  |
| C | -4.76788500 | -2.13148200 | -0.59559500 | H                                                    | -0.57312100 | -0.10128600 | 2.14172700  |
| H | -4.90297200 | -0.13816600 | 0.23245800  | C                                                    | -0.21592200 | -3.84384500 | 1.20699100  |
| H | -4.34315900 | -4.05131900 | -1.48689900 | H                                                    | 1.69789900  | -3.27858800 | 0.38571800  |
| H | -5.79527500 | -2.38023700 | -0.35134200 | C                                                    | -1.37577100 | -3.40030100 | 1.85180300  |
| O | -2.33413000 | 0.62959500  | -0.21675900 | H                                                    | -2.40141900 | -1.70301300 | 2.69791900  |
| C | -2.96002600 | 1.85958700  | -0.31991500 | H                                                    | -0.10691400 | -4.89207200 | 0.94444200  |
| O | -4.09851500 | 1.98525000  | -0.71217200 | H                                                    | -2.17286400 | -4.10065200 | 2.08177100  |
| C | -2.05398600 | 2.94972900  | 0.10067200  | N                                                    | 2.57054300  | -0.07971400 | -1.77632900 |
| C | -2.55336500 | 4.26194300  | 0.06413800  | N                                                    | -0.84159200 | -1.15365800 | -1.48917300 |
| C | -0.73666600 | 2.70840700  | 0.51959600  | Electronic Energy = -1488.333561 Hartree             |             |             |             |
| C | -1.73798700 | 5.32349900  | 0.44595100  | Thermal Correction to Free Energy = 0.329100 Hartree |             |             |             |
| H | -3.57353600 | 4.42720200  | -0.26458100 | Imaginary Freq= -367.06                              |             |             |             |
| C | 0.07387400  | 3.77674000  | 0.90062500  | <hr/>                                                |             |             |             |
| H | -0.32786700 | 1.70773900  | 0.55784400  | <b>TS<sub>Cyclization</sub></b>                      |             |             |             |
| C | -0.42384300 | 5.08165300  | 0.86485400  |                                                      |             |             |             |
| H | -2.12321700 | 6.33798900  | 0.41823400  |                                                      |             |             |             |

## Supporting Information

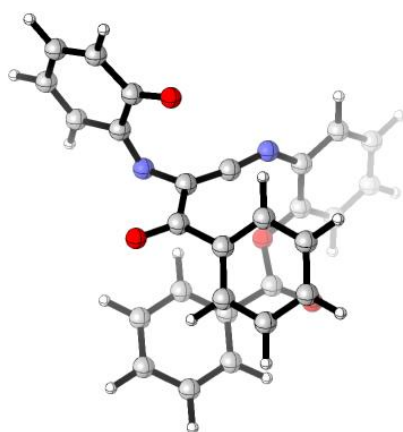

|   |             |             |             |   |             |             |             |
|---|-------------|-------------|-------------|---|-------------|-------------|-------------|
| C | -5.57645600 | 0.47643100  | 0.78628200  | C | 3.00008900  | 4.40014800  | -1.03492600 |
| C | -4.11070000 | 0.44825600  | 0.70972000  | H | 3.62227200  | 2.57360700  | -2.01195000 |
| C | -3.50642400 | 0.03661800  | -0.64116100 | H | 2.14557000  | 6.04749100  | 0.06816800  |
| C | -4.42383700 | -0.16881000 | -1.76304600 | H | 3.82484900  | 4.98282200  | -1.43219700 |
| C | -5.76116400 | -0.06907000 | -1.60271200 | O | 1.64281500  | 0.97478500  | -1.20996500 |
| C | -6.34179200 | 0.24944100  | -0.30627700 | C | 2.65201700  | 0.05519400  | -0.98634800 |
| H | -6.00065400 | 0.72452400  | 1.75343400  | O | 3.71980800  | 0.35998500  | -0.50633600 |
| H | -3.96987100 | -0.42704400 | -2.71377500 | C | 2.24314600  | -1.30731500 | -1.39304800 |
| H | -6.42837300 | -0.23939300 | -2.44167900 | C | 3.17742600  | -2.33996400 | -1.22140700 |
| H | -7.42425500 | 0.30482000  | -0.22913000 | C | 0.96296600  | -1.59139200 | -1.88874300 |
| C | -1.27508500 | -0.08934500 | 0.16755400  | C | 2.82856600  | -3.64978000 | -1.53594100 |
| C | -0.63184400 | 1.06222700  | 0.32648300  | H | 4.15791900  | -2.09739800 | -0.82742700 |
| C | 0.88046100  | 2.88702900  | -0.01487900 | C | 0.61441400  | -2.90762600 | -2.18714800 |
| C | 1.83656700  | 2.29827900  | -0.86213700 | H | 0.23655800  | -0.79902400 | -2.01129400 |
| C | 1.00692000  | 4.24165800  | 0.31813500  | C | 1.54344300  | -3.93555100 | -2.01190800 |
| C | 2.89232500  | 3.04976100  | -1.36945600 | H | 3.54976800  | -4.44970500 | -1.40014900 |
| C | 2.05789300  | 4.99809400  | -0.19265200 | H | -0.38981500 | -3.12826000 | -2.53149100 |
| H | 0.26412100  | 4.67515500  | 0.97881000  | H | 1.26514800  | -4.96045800 | -2.23806800 |
|   |             |             |             | O | -3.40858900 | 0.74163000  | 1.67083300  |
|   |             |             |             | C | -0.86074200 | -1.35526500 | 0.80221900  |
|   |             |             |             | O | -1.42959700 | -2.40457100 | 0.50832800  |
|   |             |             |             | C | 0.28669700  | -1.32857400 | 1.75795000  |
|   |             |             |             | C | 1.22582700  | -2.36637700 | 1.68106000  |
|   |             |             |             | C | 0.44291300  | -0.31835000 | 2.71705100  |
|   |             |             |             | C | 2.33393100  | -2.36946300 | 2.52451200  |

## Supporting Information

|                                                                                     |             |             |             |   |             |             |             |
|-------------------------------------------------------------------------------------|-------------|-------------|-------------|---|-------------|-------------|-------------|
| H                                                                                   | 1.08347000  | -3.14770600 | 0.94328500  | H | 3.75837000  | 2.14317600  | -1.08295300 |
| C                                                                                   | 1.54625500  | -0.33466000 | 3.57206300  | H | 5.80558900  | 0.69812100  | -1.15410100 |
| H                                                                                   | -0.30621800 | 0.45965500  | 2.81445000  | H | 5.56435400  | -1.75333100 | -1.49382800 |
| C                                                                                   | 2.49858800  | -1.35131600 | 3.46904500  | C | 0.12661600  | 0.76037200  | -1.42736700 |
| H                                                                                   | 3.07186700  | -3.16168600 | 2.44298400  | C | -0.08974600 | -0.70994000 | -1.40584100 |
| H                                                                                   | 1.65984000  | 0.44522100  | 4.31871100  | C | -2.26057000 | -1.83163500 | -0.64327300 |
| H                                                                                   | 3.36371000  | -1.35341400 | 4.12522500  | C | -2.34392600 | -1.91765200 | 0.76541800  |
| N                                                                                   | -2.26102400 | -0.19949100 | -0.86406300 | C | -3.33839600 | -2.32358800 | -1.39912600 |
| N                                                                                   | -0.19266300 | 2.17870300  | 0.54513500  | C | -3.44474000 | -2.46887400 | 1.39735800  |
| Electronic Energy = -1488.343889 Hartree                                            |             |             |             | C | -4.44602400 | -2.87819900 | -0.75903900 |
| Thermal Correction to Free Energy = 0.328683 Hartree                                |             |             |             | H | -3.28917400 | -2.25544600 | -2.47977100 |
| Imaginary Freq= -70.72                                                              |             |             |             | C | -4.51048300 | -2.95634300 | 0.63442000  |
| <hr/>                                                                               |             |             |             | H | -3.45571400 | -2.50959500 | 2.48146100  |
| <b>TS<sub>z_E</sub></b>                                                             |             |             |             | H | -5.26835600 | -3.25175500 | -1.36141500 |
| 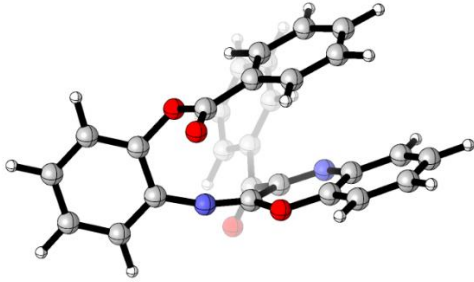 |             |             |             | H | -5.37500400 | -3.39073400 | 1.12437200  |
|                                                                                     |             |             |             | O | -1.31352000 | -1.33759800 | 1.51117400  |
|                                                                                     |             |             |             | C | -0.09344400 | -1.96620100 | 1.49555100  |
|                                                                                     |             |             |             | O | 0.05800100  | -3.11826600 | 1.15847500  |
| C                                                                                   | 3.42276800  | -1.70511000 | -1.58963800 | C | 1.00320300  | -1.04438300 | 1.89427300  |
| C                                                                                   | 2.29663000  | -0.88711500 | -1.52734900 | C | 2.32129300  | -1.51045200 | 1.78721500  |
| C                                                                                   | 2.41262900  | 0.50333600  | -1.35486600 | C | 0.75806700  | 0.27184500  | 2.30940200  |
| C                                                                                   | 3.68958200  | 1.06900500  | -1.21783400 | C | 3.38644400  | -0.66427400 | 2.08365900  |
| C                                                                                   | 4.81870300  | 0.26055800  | -1.26093700 | H | 2.48698800  | -2.52818300 | 1.45300600  |
| C                                                                                   | 4.68133800  | -1.12331500 | -1.45350800 | C | 1.82825000  | 1.11208500  | 2.61518200  |
| H                                                                                   | 3.29323800  | -2.77309200 | -1.72509600 | H | -0.26229500 | 0.62809500  | 2.38074900  |

## Supporting Information

|   |             |             |             |
|---|-------------|-------------|-------------|
| C | 3.14115200  | 0.64818900  | 2.49747800  |
| H | 4.40550200  | -1.02110600 | 1.97857200  |
| H | 1.63857000  | 2.13102600  | 2.93861200  |
| H | 3.97207600  | 1.30980600  | 2.72282700  |
| O | 1.06574300  | -1.47193800 | -1.62083700 |
| C | -1.11043100 | 1.61990500  | -1.58607400 |
| O | -1.84909100 | 1.36686600  | -2.52844800 |
| C | -1.38887400 | 2.71862100  | -0.62557800 |
| C | -2.57009700 | 3.45907000  | -0.80453600 |
| C | -0.54671100 | 3.01033300  | 0.45892000  |
| C | -2.90260600 | 4.47398600  | 0.08681700  |
| H | -3.21179800 | 3.21529100  | -1.64401500 |
| C | -0.88379900 | 4.02887600  | 1.34981700  |
| H | 0.36919000  | 2.45330700  | 0.59625500  |
| C | -2.05966700 | 4.76031900  | 1.16728100  |
| H | -3.81757800 | 5.04076900  | -0.05413200 |
| H | -0.22789000 | 4.25324500  | 2.18553900  |
| H | -2.32064800 | 5.55136100  | 1.86396300  |
| N | 1.28683600  | 1.31890500  | -1.34618500 |
| N | -1.16361300 | -1.27747200 | -1.19951500 |

Electronic Energy = -1488.397647 Hartree

Thermal Correction to Free Energy = 0.332582 Hartree

Imaginary Freq= -151.98

**TS<sub>iso</sub>**

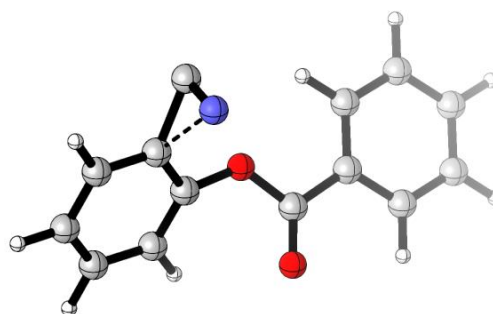

|   |             |             |             |
|---|-------------|-------------|-------------|
| C | -2.19696400 | -1.40718000 | -0.56599300 |
| C | -1.60173800 | -0.18570300 | -0.25846900 |
| C | -2.40072100 | 0.92282800  | 0.06447200  |
| C | -3.79265700 | 0.79447200  | 0.13378000  |
| C | -4.38473500 | -0.42932300 | -0.16280200 |
| C | -3.58651400 | -1.52410500 | -0.51164600 |
| H | -1.57542000 | -2.25422700 | -0.82350100 |
| H | -4.38744900 | 1.65691300  | 0.40991300  |
| H | -5.46374000 | -0.53071400 | -0.11657600 |
| H | -4.04645700 | -2.48002000 | -0.74003500 |
| C | -1.71055200 | 2.39216600  | 0.06344600  |
| O | -0.24770700 | 0.04136000  | -0.35356500 |
| C | 0.66484400  | -0.82103300 | 0.21414700  |
| O | 0.34874400  | -1.84254000 | 0.78080500  |
| C | 2.04915100  | -0.32435200 | 0.03249800  |
| C | 3.09679400  | -1.13089600 | 0.50110700  |
| C | 2.32799900  | 0.90976500  | -0.57388500 |
| C | 4.41599200  | -0.70813400 | 0.35883000  |
| H | 2.85769700  | -2.07825700 | 0.97147300  |
| C | 3.65098400  | 1.32731100  | -0.71226600 |

## Supporting Information

|   |             |             |             |
|---|-------------|-------------|-------------|
| H | 1.51402900  | 1.53192700  | -0.92523000 |
| C | 4.69412400  | 0.52088100  | -0.24831100 |
| H | 5.22628800  | -1.33305100 | 0.72066900  |
| H | 3.86770100  | 2.28286700  | -1.17905300 |
| H | 5.72298000  | 0.85035000  | -0.35778400 |
| N | -1.69713900 | 2.10621000  | 1.23039400  |

Electronic Energy = -744.109053 Hartree

Thermal Correction to Free Energy = 0.148442 Hartree

Imaginary Freq= -385.79

---

### Phenyl isocyanide

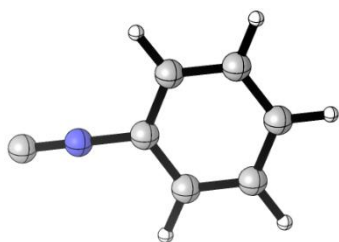

|   |             |             |             |
|---|-------------|-------------|-------------|
| C | -1.44944300 | 1.21006200  | 0.00004800  |
| C | -0.05545600 | 1.21840200  | -0.00008100 |
| C | 0.63534100  | 0.00008600  | 0.00001000  |
| C | -0.05532200 | -1.21830000 | 0.00002400  |
| C | -1.44931100 | -1.21017300 | -0.00004100 |
| C | -2.14876400 | -0.00010000 | 0.00002100  |
| H | -1.98927300 | 2.15154700  | 0.00007600  |
| H | 0.50367500  | -2.14718300 | 0.00002200  |
| H | -1.98904500 | -2.15170700 | -0.00010800 |
| H | -3.23400700 | -0.00017000 | 0.00008200  |
| C | 3.19930000  | -0.00012500 | 0.00002800  |

|   |            |            |             |
|---|------------|------------|-------------|
| N | 2.02103400 | 0.00014300 | -0.00000100 |
| H | 0.50334300 | 2.14740000 | -0.00010600 |

Electronic Energy = -324.504998 Hartree

Thermal Correction to Free Energy = 0.068291 Hartree

Imaginary Freq= 0

---

### Com-M

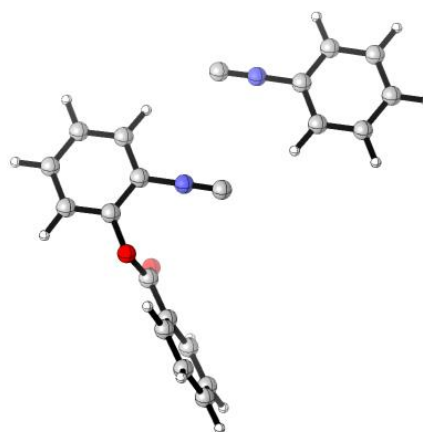

|   |             |             |             |
|---|-------------|-------------|-------------|
| C | -6.79705600 | -1.49352400 | 0.08514800  |
| C | -6.14958900 | -0.25932900 | 0.10261100  |
| C | -4.75371400 | -0.22054000 | -0.00505000 |
| C | -4.00112200 | -1.39493400 | -0.12958400 |
| C | -4.66636600 | -2.62024300 | -0.14495400 |
| C | -6.05898900 | -2.67436700 | -0.03837000 |
| H | -7.87850700 | -1.53169900 | 0.16840200  |
| H | -2.92121200 | -1.33246900 | -0.21024400 |
| H | -4.09060800 | -3.53529300 | -0.24038000 |
| H | -6.56800100 | -3.63298200 | -0.05107200 |
| C | -3.53654600 | 2.03506400  | 0.02554500  |
| C | -0.63020000 | -0.27656500 | -0.31058400 |
| C | 0.55767200  | 1.98358600  | -0.18228900 |

## Supporting Information

|   |             |             |             |
|---|-------------|-------------|-------------|
| C | -0.17276000 | 3.16864700  | -0.03941200 |
| C | 1.95724300  | 2.02606400  | -0.26240300 |
| C | 0.50471900  | 4.38538900  | 0.01750900  |
| C | 2.62796200  | 3.24030000  | -0.20634100 |
| C | 1.89916800  | 4.42348500  | -0.06691200 |
| H | -0.06098700 | 5.30451500  | 0.12738800  |
| H | 3.71038300  | 3.24305500  | -0.27003100 |
| H | 2.42289900  | 5.37279400  | -0.02169800 |
| N | -4.10450900 | 1.00542500  | 0.01201700  |
| N | -0.08771400 | 0.76524800  | -0.25068900 |
| H | -1.25447100 | 3.11331400  | 0.02050500  |
| O | 2.67197700  | 0.85640200  | -0.47112700 |
| C | 2.82367100  | 0.00433400  | 0.60422900  |
| O | 2.44786400  | 0.29038000  | 1.71756000  |
| C | 3.49680500  | -1.25690300 | 0.21360500  |
| C | 3.76453800  | -2.19212200 | 1.22362100  |
| C | 3.85481400  | -1.53402000 | -1.11358700 |
| C | 4.38995600  | -3.39583000 | 0.90796600  |
| H | 3.47391000  | -1.95872200 | 2.24190500  |
| C | 4.48000000  | -2.74105800 | -1.42383600 |
| H | 3.63888400  | -0.80953800 | -1.88938100 |
| C | 4.74843200  | -3.67118200 | -0.41560000 |
| H | 4.59659400  | -4.11932600 | 1.69023100  |
| H | 4.75539900  | -2.95721400 | -2.45123400 |
| H | 5.23482200  | -4.61049600 | -0.66103700 |

H -6.70409600 0.66756300 0.19799500

Electronic Energy = -1068.685577 Hartree

Thermal Correction to Free Energy = 0.234774 Hartree

Imaginary Freq= 0

---

**INT<sub>Trans-M</sub>**

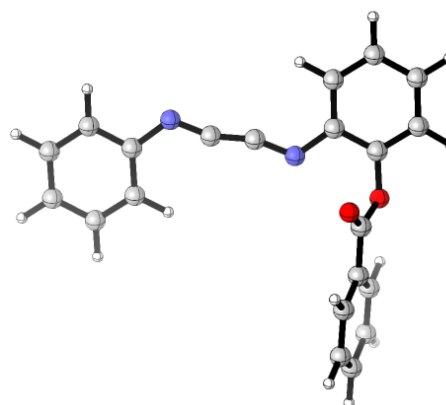

|   |             |             |             |
|---|-------------|-------------|-------------|
| C | -6.78839400 | -0.37328800 | 0.11739900  |
| C | -5.80403100 | 0.61123200  | 0.19021900  |
| C | -4.45318700 | 0.26961300  | 0.02539500  |
| C | -4.09560800 | -1.07092400 | -0.21151700 |
| C | -5.08263200 | -2.04783300 | -0.28238000 |
| C | -6.43125500 | -1.70350100 | -0.11881600 |
| H | -7.83213400 | -0.10397100 | 0.24534700  |
| H | -3.04764300 | -1.32672600 | -0.33488000 |
| H | -4.80524600 | -3.08171100 | -0.46436500 |
| H | -7.19707600 | -2.47092700 | -0.17485200 |
| C | -2.28850400 | 1.13094400  | -0.03264900 |
| C | -1.02555900 | 1.32159300  | -0.11943800 |
| C | 1.14358000  | 2.15767000  | -0.19467100 |
| C | 0.81428400  | 3.52029800  | -0.08798300 |



## Supporting Information

|   |             |             |             |
|---|-------------|-------------|-------------|
| C | 2.50318400  | 1.79976700  | -0.25171500 |
| C | 1.81134500  | 4.48830900  | -0.05207500 |
| C | 3.50465100  | 2.76212000  | -0.21344600 |
| C | 3.15862900  | 4.11072100  | -0.11688400 |
| H | 1.54342300  | 5.53713100  | 0.02556700  |
| H | 4.54009700  | 2.44309500  | -0.25667300 |
| H | 3.93831200  | 4.86504500  | -0.08820600 |
| N | -3.52342600 | 1.32344100  | 0.11398400  |
| N | 0.20732300  | 1.11802900  | -0.26724100 |
| H | -0.23464800 | 3.79686500  | -0.04242100 |
| O | 2.86252500  | 0.47201100  | -0.41483400 |
| C | 2.62038900  | -0.39097300 | 0.62990900  |
| O | 2.30511000  | -0.01191100 | 1.73457400  |
| C | 2.82777200  | -1.80478400 | 0.23080900  |
| C | 2.72804800  | -2.78627800 | 1.22704800  |
| C | 3.10254100  | -2.17454900 | -1.09329600 |
| C | 2.90735300  | -4.12879900 | 0.90158700  |
| H | 2.50935100  | -2.47751700 | 2.24331500  |
| C | 3.27985700  | -3.52007500 | -1.41420100 |
| H | 3.16992600  | -1.41063800 | -1.85831400 |
| C | 3.18372500  | -4.49699200 | -0.41915100 |
| H | 2.83129000  | -4.88756200 | 1.67411400  |
| H | 3.49071700  | -3.80673100 | -2.43973000 |
| H | 3.32270600  | -5.54380300 | -0.67239800 |
| H | -6.05456600 | 1.65072700  | 0.37351400  |

Electronic Energy = -1068.685073 Hartree

Thermal Correction to Free Energy = 0.241267 Hartree

Imaginary Freq= 0

---

**INT<sub>Cis-M</sub>**

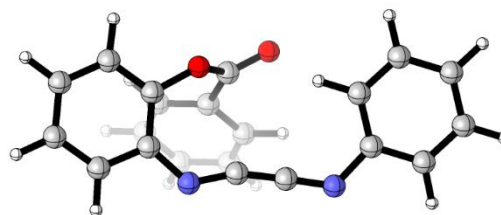

|   |             |             |             |
|---|-------------|-------------|-------------|
| C | -3.10407500 | -1.87365400 | 1.26295800  |
| C | -2.04483200 | -1.35458500 | 0.52255600  |
| C | -2.13236400 | -1.23699700 | -0.88307800 |
| C | -3.35433900 | -1.58998500 | -1.48900900 |
| C | -4.41989600 | -2.09174700 | -0.75143700 |
| C | -4.29113800 | -2.24598800 | 0.63288800  |
| H | -2.97957600 | -1.96714100 | 2.33676300  |
| H | -3.42013700 | -1.46828600 | -2.56478700 |
| H | -5.34311000 | -2.36660300 | -1.25065800 |
| H | -5.11046000 | -2.64588200 | 1.22154200  |
| C | 0.07626800  | -0.63029500 | -1.49485700 |
| C | 1.32171700  | -0.38645500 | -1.61761100 |
| C | 3.52452400  | -0.31155100 | -0.78016300 |
| C | 3.25612200  | -0.78087500 | 0.51806400  |
| C | 4.83845600  | 0.02241300  | -1.14899800 |
| C | 4.29750600  | -0.90467900 | 1.43151800  |
| C | 5.87549400  | -0.10679400 | -0.22819000 |

## Supporting Information

|   |             |             |             |
|---|-------------|-------------|-------------|
| H | 5.01587200  | 0.37806700  | -2.15847200 |
| C | 5.60713800  | -0.57058900 | 1.06366400  |
| H | 4.08661000  | -1.25634400 | 2.43654200  |
| H | 6.88981400  | 0.15244600  | -0.51504300 |
| H | 6.41417500  | -0.67020000 | 1.78318900  |
| O | -0.90085200 | -1.03619000 | 1.23645000  |
| C | -0.37194900 | 0.23197900  | 1.33873200  |
| O | 0.68851900  | 0.33807600  | 1.90857500  |
| C | -1.09748900 | 1.39270100  | 0.74742600  |
| C | -0.30475100 | 2.37287800  | 0.13129700  |
| C | -2.48537100 | 1.57066700  | 0.82895300  |
| C | -0.89777500 | 3.49964000  | -0.43170600 |
| H | 0.76982800  | 2.23313100  | 0.09433900  |
| C | -3.07166900 | 2.71301000  | 0.28343200  |
| H | -3.10791500 | 0.83635300  | 1.32394900  |
| C | -2.28326100 | 3.67082800  | -0.35768600 |
| H | -0.28062700 | 4.24403900  | -0.92444500 |
| H | -4.14569000 | 2.85078200  | 0.35726600  |
| H | -2.74606100 | 4.55103200  | -0.79331800 |
| N | -1.14694400 | -0.78842400 | -1.76539600 |
| N | 2.54489400  | -0.15515300 | -1.77570500 |
| H | 2.24039800  | -1.02097400 | 0.80811500  |

Electronic Energy = -1068.675300 Hartree

Thermal Correction to Free Energy = 0.242136 Hartree

Imaginary Freq= 0

INTy-M

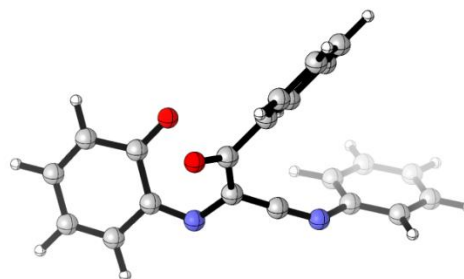

|   |             |             |             |
|---|-------------|-------------|-------------|
| C | -4.44897300 | -0.13186200 | -1.37601900 |
| C | -3.11369100 | -0.09954000 | -0.78868700 |
| C | -2.85947700 | -1.04803200 | 0.35962300  |
| C | -3.89871700 | -1.99863100 | 0.70671500  |
| C | -5.11600000 | -1.96614400 | 0.10668800  |
| C | -5.39222500 | -1.00688200 | -0.93979000 |
| H | -4.64330700 | 0.58172400  | -2.16969000 |
| H | -3.66484300 | -2.70357700 | 1.49769600  |
| H | -5.89581300 | -2.65927600 | 0.40507800  |
| H | -6.38130300 | -1.00209300 | -1.39022600 |
| C | -0.70527800 | -0.25369600 | 0.91134000  |
| C | 0.54244000  | -0.69824900 | 1.17333800  |
| C | 2.71500700  | -1.49666400 | 0.58694200  |
| C | 2.45849900  | -1.93980000 | -0.71816900 |
| C | 4.01357300  | -1.50626200 | 1.10223000  |
| C | 3.51642900  | -2.37997600 | -1.50984200 |
| C | 5.06733100  | -1.94201100 | 0.29839300  |
| H | 4.17923200  | -1.16552000 | 2.11830700  |
| C | 4.82187900  | -2.37869200 | -1.00585800 |

## Supporting Information

|   |             |             |             |
|---|-------------|-------------|-------------|
| H | 3.32257300  | -2.72589000 | -2.52033500 |
| H | 6.07851500  | -1.94394800 | 0.69240700  |
| H | 5.64274500  | -2.72244900 | -1.62715700 |
| O | -2.21368500 | 0.61200400  | -1.25253500 |
| C | -0.89266200 | 1.24742200  | 0.83395000  |
| O | -1.87742400 | 1.75507800  | 1.34621000  |
| C | 0.21280100  | 2.05974100  | 0.25166400  |
| C | 0.41793400  | 3.35808800  | 0.74001700  |
| C | 1.03331000  | 1.56609100  | -0.77168200 |
| C | 1.45176900  | 4.14114700  | 0.23108100  |
| H | -0.23781300 | 3.73031100  | 1.51990600  |
| C | 2.06091300  | 2.35454300  | -1.28752500 |
| H | 0.84131000  | 0.58394300  | -1.18774600 |
| C | 2.27661600  | 3.63913300  | -0.78130800 |
| H | 1.61629300  | 5.14097100  | 0.62091600  |
| H | 2.68682500  | 1.97005100  | -2.08679200 |
| H | 3.08094000  | 4.25078500  | -1.17909800 |
| N | -1.72070100 | -1.17522700 | 0.99048500  |
| N | 1.67704900  | -1.03131900 | 1.42567200  |
| H | 1.44022000  | -1.94420900 | -1.09436500 |

Electronic Energy = -1068.679911 Hartree

Thermal Correction to Free Energy = 0.242071 Hartree

Imaginary Freq= 0

**TS1-M**

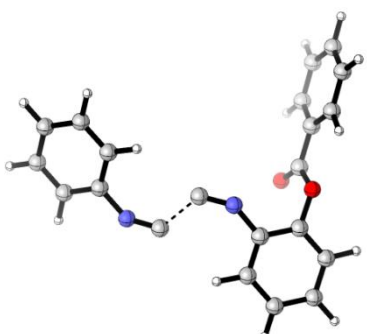

|   |             |             |             |
|---|-------------|-------------|-------------|
| C | 6.49022300  | -1.04664300 | -0.63089100 |
| C | 5.63917900  | 0.05106800  | -0.75794400 |
| C | 4.41961900  | 0.05556100  | -0.07343700 |
| C | 4.04667300  | -1.02006800 | 0.74287700  |
| C | 4.90742500  | -2.10918200 | 0.86401500  |
| C | 6.12766100  | -2.12613300 | 0.17956400  |
| H | 7.43657400  | -1.05779200 | -1.16233400 |
| H | 3.09200400  | -0.98915800 | 1.25751500  |
| H | 4.62593000  | -2.94681800 | 1.49478900  |
| H | 6.79404900  | -2.97721400 | 0.27984700  |
| C | 2.46606800  | 1.58954200  | 0.00896700  |
| C | 1.08058400  | 0.68151600  | 0.68892800  |
| C | -0.88460600 | 2.14556700  | 0.38989600  |
| C | -0.36720800 | 3.44394100  | 0.31281300  |
| C | -2.25498200 | 1.93322000  | 0.18681600  |
| C | -1.21794300 | 4.51258900  | 0.03700100  |
| C | -3.10396800 | 2.99665000  | -0.09145000 |
| C | -2.58404000 | 4.29099700  | -0.16260700 |
| H | -0.81511300 | 5.51869300  | -0.01884000 |
| H | -4.15842200 | 2.79859000  | -0.24879100 |

## Supporting Information

|   |             |             |             |
|---|-------------|-------------|-------------|
| H | -3.24645300 | 5.12395500  | -0.37480700 |
| N | 3.56710900  | 1.15626100  | -0.20658500 |
| N | -0.06416500 | 1.06154200  | 0.68191400  |
| H | 0.69680800  | 3.58921200  | 0.46497800  |
| O | -2.78707800 | 0.65977700  | 0.32445800  |
| C | -2.47740400 | -0.27032600 | -0.64271000 |
| O | -1.88201800 | 0.01350900  | -1.65684200 |
| C | -2.97805600 | -1.62011600 | -0.28509100 |
| C | -2.79686700 | -2.65111700 | -1.21795300 |
| C | -3.60635100 | -1.88455200 | 0.94021200  |
| C | -3.24507700 | -3.93775300 | -0.92836600 |
| H | -2.30398800 | -2.42447800 | -2.15689500 |
| C | -4.05233900 | -3.17464900 | 1.22538700  |
| H | -3.73695800 | -1.08412700 | 1.65830300  |
| C | -3.87337500 | -4.20069300 | 0.29321000  |
| H | -3.10458600 | -4.73496700 | -1.65149600 |
| H | -4.53724600 | -3.38011600 | 2.17455200  |
| H | -4.22175100 | -5.20418800 | 0.51867000  |
| H | 5.90001800  | 0.90099800  | -1.37913500 |

Electronic Energy = -1068.652636 Hartree

Thermal Correction to Free Energy = 0.236223 Hartree

Imaginary Freq= -465.90

---

**TS<sub>Rot-M</sub>**

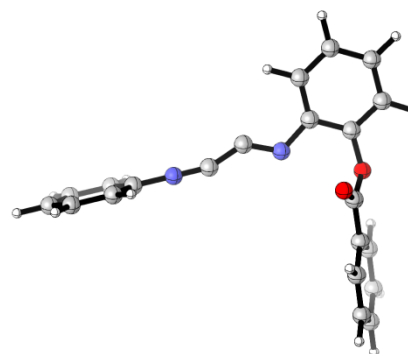

|   |             |             |             |
|---|-------------|-------------|-------------|
| C | 6.59994800  | 0.61357900  | -1.16096800 |
| C | 5.25472600  | 0.26665400  | -1.25205300 |
| C | 4.48818600  | 0.15425800  | -0.07552800 |
| C | 5.07941500  | 0.40003600  | 1.17956800  |
| C | 6.42365900  | 0.75678900  | 1.24346300  |
| C | 7.19298700  | 0.86336500  | 0.08058900  |
| H | 7.18742900  | 0.69371100  | -2.07044600 |
| H | 4.47796200  | 0.31098100  | 2.07726700  |
| H | 6.87340800  | 0.94864900  | 2.21280200  |
| H | 8.24069100  | 1.13824400  | 0.14103500  |
| C | 2.02268800  | -0.50061800 | -0.19205000 |
| C | 0.92188800  | -1.28264800 | -0.12331200 |
| C | -1.22728000 | -2.14978500 | -0.18115200 |
| C | -0.86133600 | -3.50251000 | -0.06906500 |
| C | -2.59751600 | -1.82964500 | -0.19388200 |
| C | -1.83067400 | -4.49538500 | 0.01573200  |
| C | -3.57301000 | -2.81557400 | -0.10424000 |
| C | -3.18894500 | -4.15327900 | -0.00293300 |
| H | -1.53361200 | -5.53642200 | 0.09499100  |

## Supporting Information

|   |             |             |             |
|---|-------------|-------------|-------------|
| H | -4.61717700 | -2.52312700 | -0.11310600 |
| H | -3.94749000 | -4.92674200 | 0.06357900  |
| N | 3.17551400  | -0.19161800 | -0.14945500 |
| N | -0.32430700 | -1.08387000 | -0.31212800 |
| H | 0.19646100  | -3.74520900 | -0.06064200 |
| O | -3.00124800 | -0.51482100 | -0.36393600 |
| C | -2.71666400 | 0.38192300  | 0.63858300  |
| O | -2.33987600 | 0.04362300  | 1.73760100  |
| C | -2.96705200 | 1.78017500  | 0.20852100  |
| C | -2.84415400 | 2.79250600  | 1.17055400  |
| C | -3.30291300 | 2.10587400  | -1.11295200 |
| C | -3.06120600 | 4.12160200  | 0.81424100  |
| H | -2.57778800 | 2.51771800  | 2.18520600  |
| C | -3.51771900 | 3.43808500  | -1.46514700 |
| H | -3.38709800 | 1.31826800  | -1.85181400 |
| C | -3.39843300 | 4.44575100  | -0.50387400 |
| H | -2.96689900 | 4.90422700  | 1.56055000  |
| H | -3.77537200 | 3.69053900  | -2.48901200 |
| H | -3.56630400 | 5.48212600  | -0.78144800 |
| H | 4.78674500  | 0.07812800  | -2.21177400 |

Electronic Energy = -1068.663300 Hartree

Thermal Correction to Free Energy = 0.239361 Hartree

Imaginary Freq= -89.42

**TS<sub>Acylshift-M</sub>**

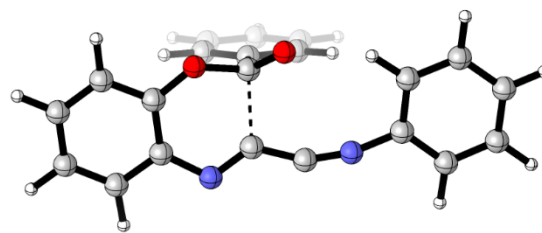

|   |             |             |             |
|---|-------------|-------------|-------------|
| C | -4.09432800 | -0.66575600 | 1.31365400  |
| C | -2.82551800 | -0.76962100 | 0.72723000  |
| C | -2.71327400 | -1.24608500 | -0.60519100 |
| C | -3.88242000 | -1.56254000 | -1.32502100 |
| C | -5.13612000 | -1.41246200 | -0.75264500 |
| C | -5.23451300 | -0.97352200 | 0.57837600  |
| H | -4.15519100 | -0.32673500 | 2.34220700  |
| H | -3.75899000 | -1.93220300 | -2.33777200 |
| H | -6.03018300 | -1.64853500 | -1.31956200 |
| H | -6.21017400 | -0.87100300 | 1.04380100  |
| C | -0.43959000 | -1.06457000 | -0.62707000 |
| C | 0.89044300  | -1.25688300 | -0.93084900 |
| C | 3.34365000  | -0.91843400 | -0.37466800 |
| C | 3.54268800  | -0.48624100 | 0.94873400  |
| C | 4.41822500  | -1.10735700 | -1.25699200 |
| C | 4.84599400  | -0.24504000 | 1.37713100  |
| C | 5.71058000  | -0.85111400 | -0.80776700 |
| H | 4.22689900  | -1.44559600 | -2.26933600 |
| C | 5.92640800  | -0.42234400 | 0.50664600  |
| H | 5.01611900  | 0.08540500  | 2.39675900  |
| H | 6.54995400  | -0.98946900 | -1.48131600 |

## Supporting Information

|   |             |             |             |
|---|-------------|-------------|-------------|
| H | 6.93705800  | -0.22805500 | 0.85153000  |
| O | -1.76266900 | -0.48102300 | 1.50929200  |
| C | -0.46485700 | 0.00319500  | 1.00918700  |
| O | 0.49319600  | -0.28740700 | 1.73465400  |
| C | -0.55979600 | 1.37418500  | 0.36825900  |
| C | 0.65449900  | 2.00143500  | 0.04623300  |
| C | -1.76081700 | 2.03322400  | 0.07721000  |
| C | 0.66785300  | 3.24604900  | -0.57905100 |
| H | 1.58340600  | 1.51031700  | 0.31089900  |
| C | -1.74532100 | 3.28500900  | -0.54336900 |
| H | -2.71153100 | 1.59098500  | 0.34345600  |
| C | -0.53503500 | 3.89172900  | -0.88223400 |
| H | 1.61602500  | 3.71761400  | -0.82020600 |
| H | -2.68455200 | 3.78694200  | -0.75592300 |
| H | -0.52749000 | 4.86374800  | -1.36610700 |
| N | -1.49217700 | -1.51110100 | -1.20658400 |
| N | 2.06017900  | -1.16433300 | -0.80576300 |
| H | 2.67592100  | -0.35508900 | 1.58961400  |

Electronic Energy = -1068.653984 Hartree

Thermal Correction to Free Energy = 0.244205 Hartree

Imaginary Freq= -285.11

## Supporting Information

### 9. $^1\text{H-NMR}$ and $^{13}\text{C-NMR}$ of unknown compounds

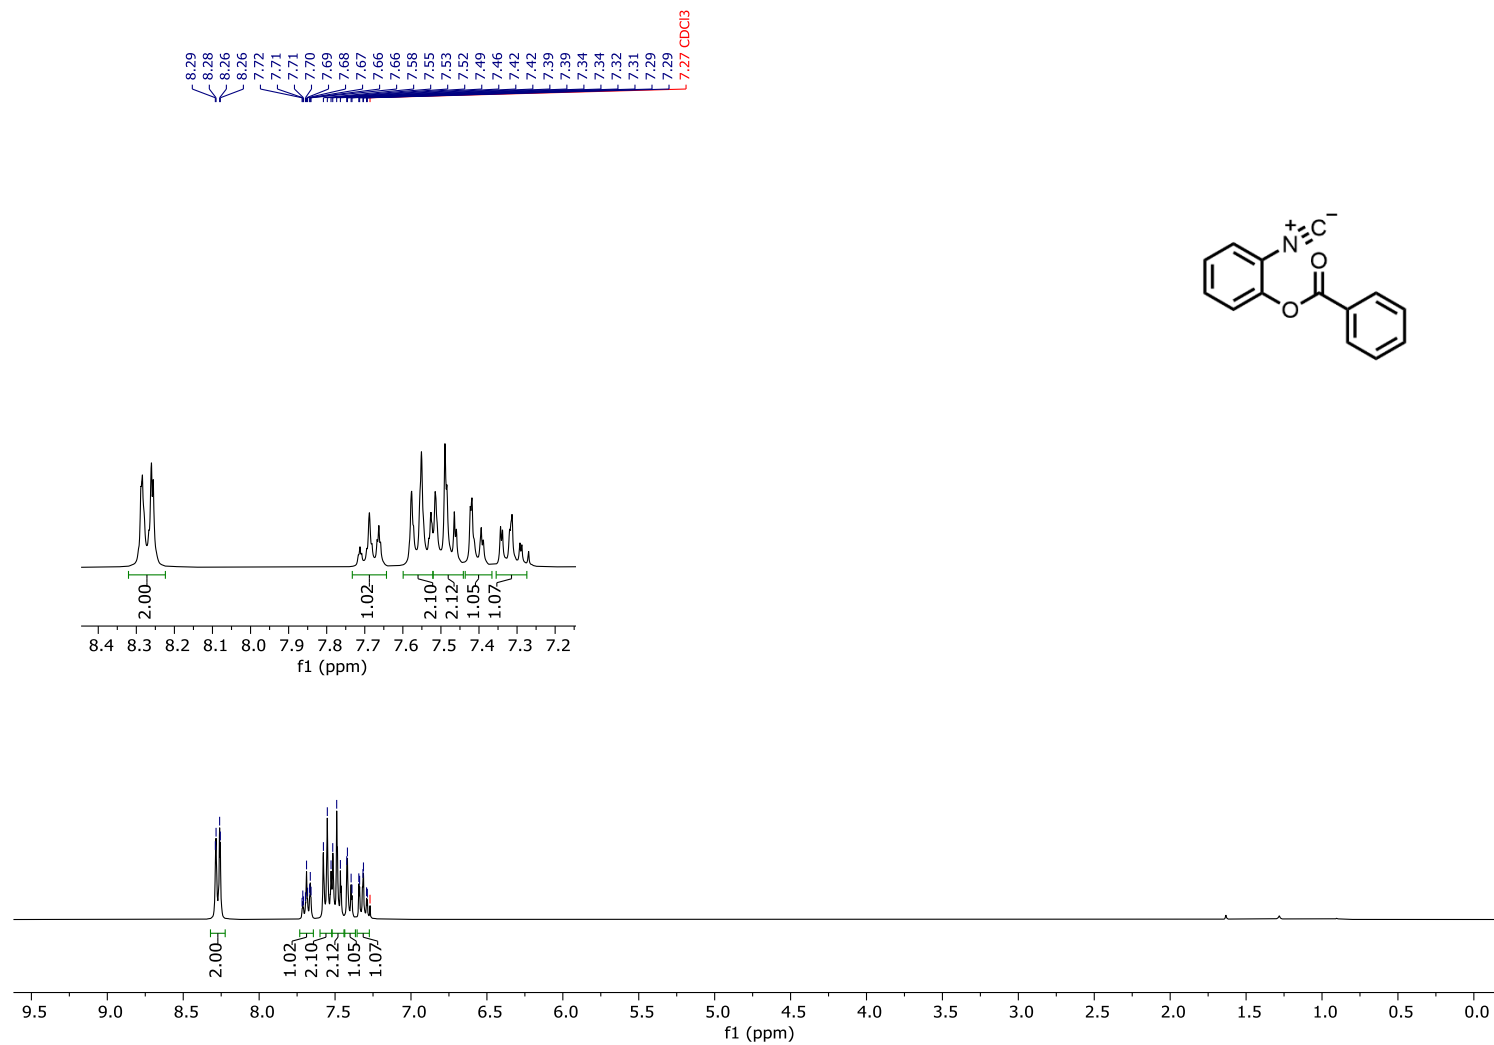

Figure S3.  $^1\text{H-NMR}$  (300 MHz,  $\text{CDCl}_3$ ) 2-isocyanophenyl benzoate (1a).

# Supporting Information

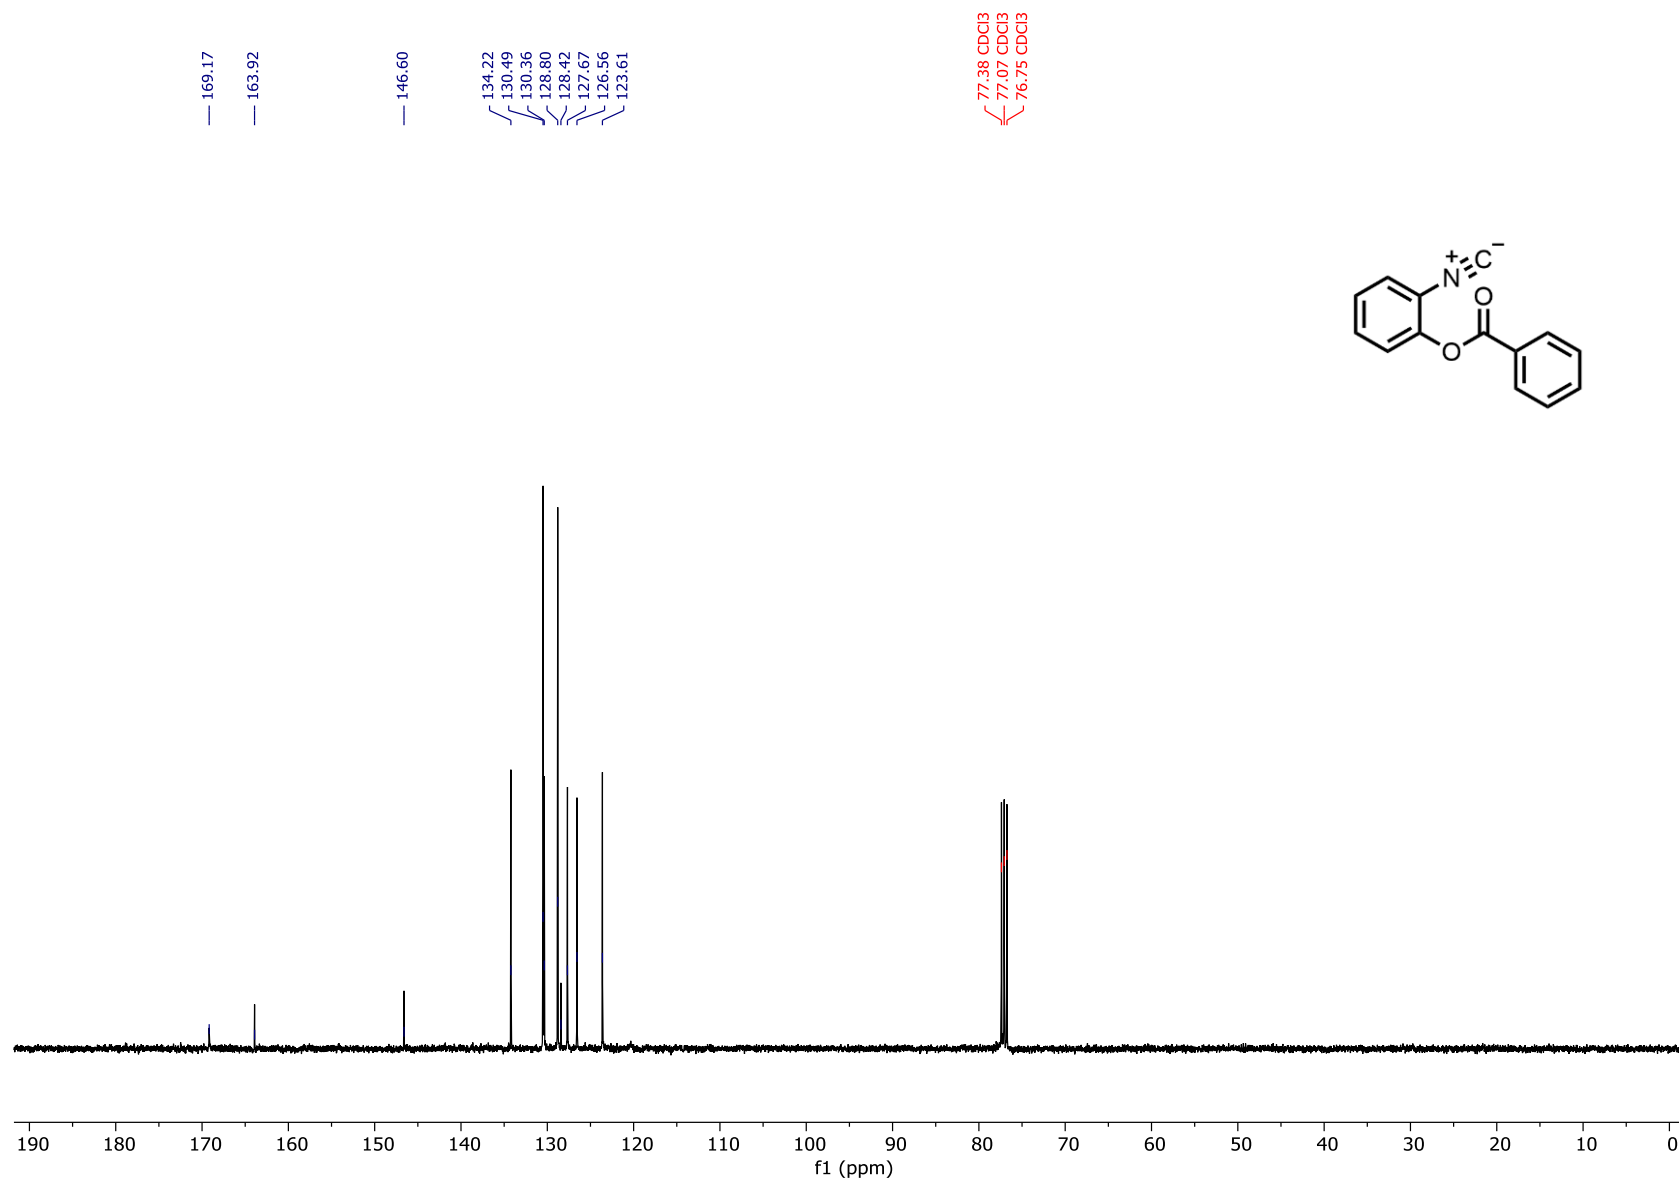

Figure S4.  $^{13}\text{C}$  NMR (101 MHz,  $\text{CDCl}_3$ ) 2-isocyanophenyl benzoate (1a).



# Supporting Information

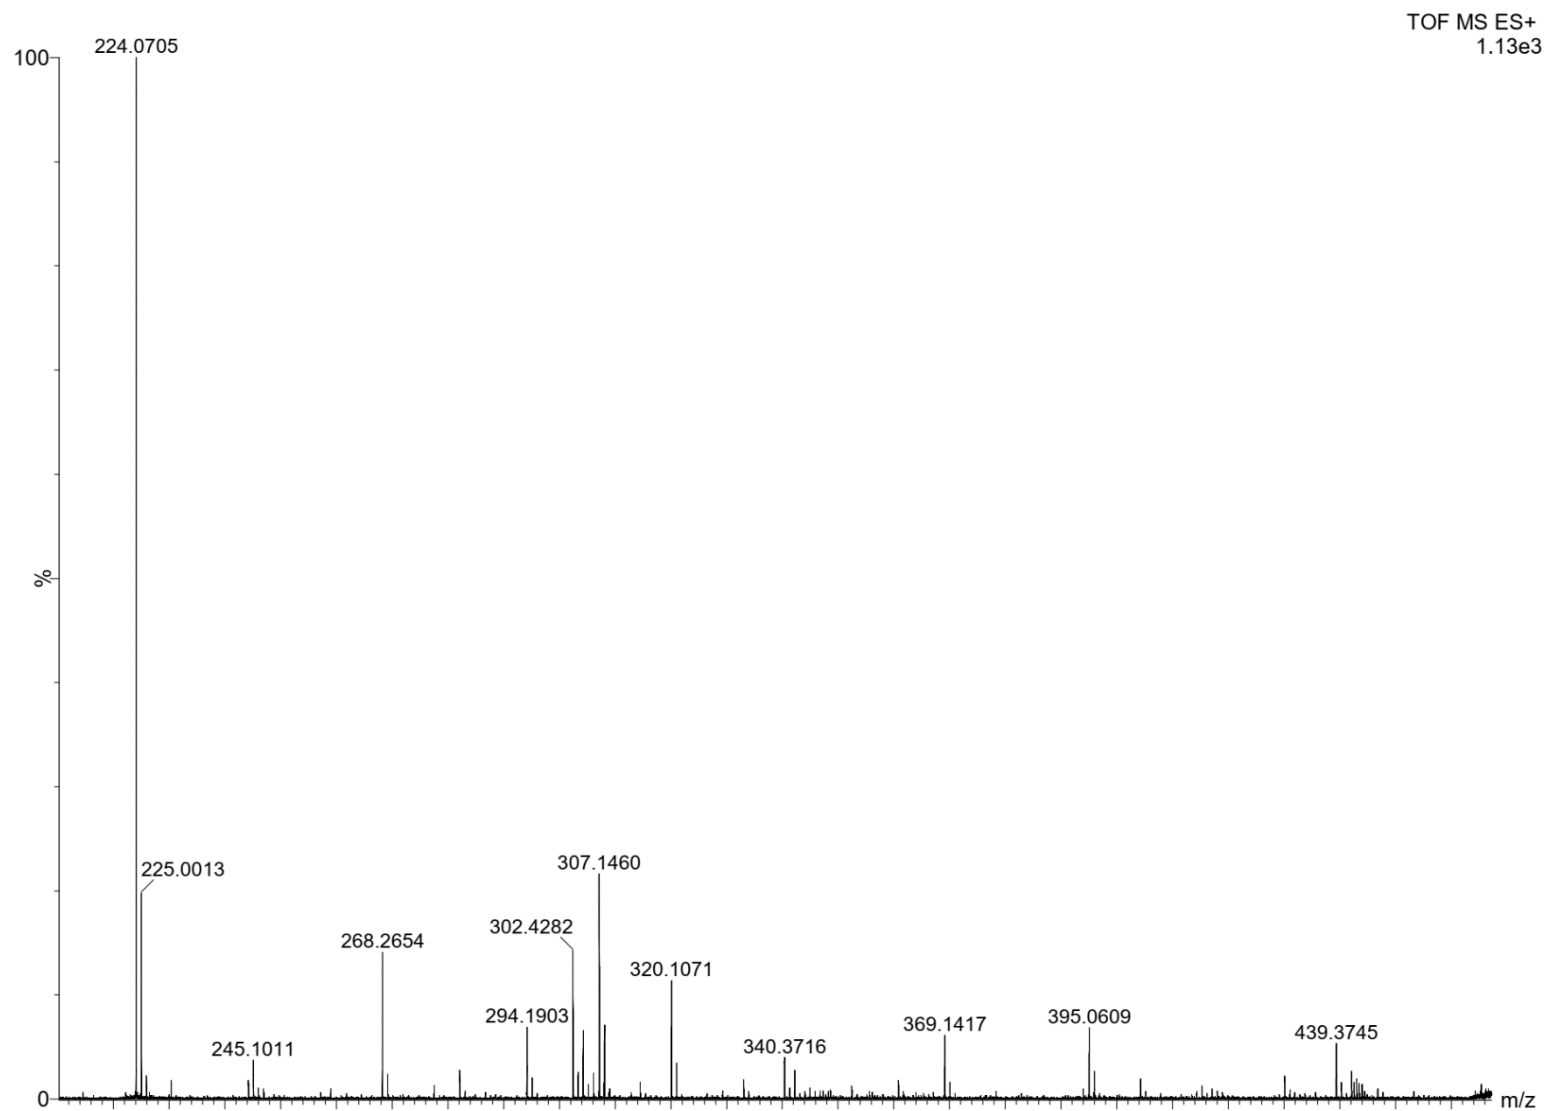

Figure S5. HRMS-ESI 2-isocyanophenyl benzoate (1a).

# Supporting Information

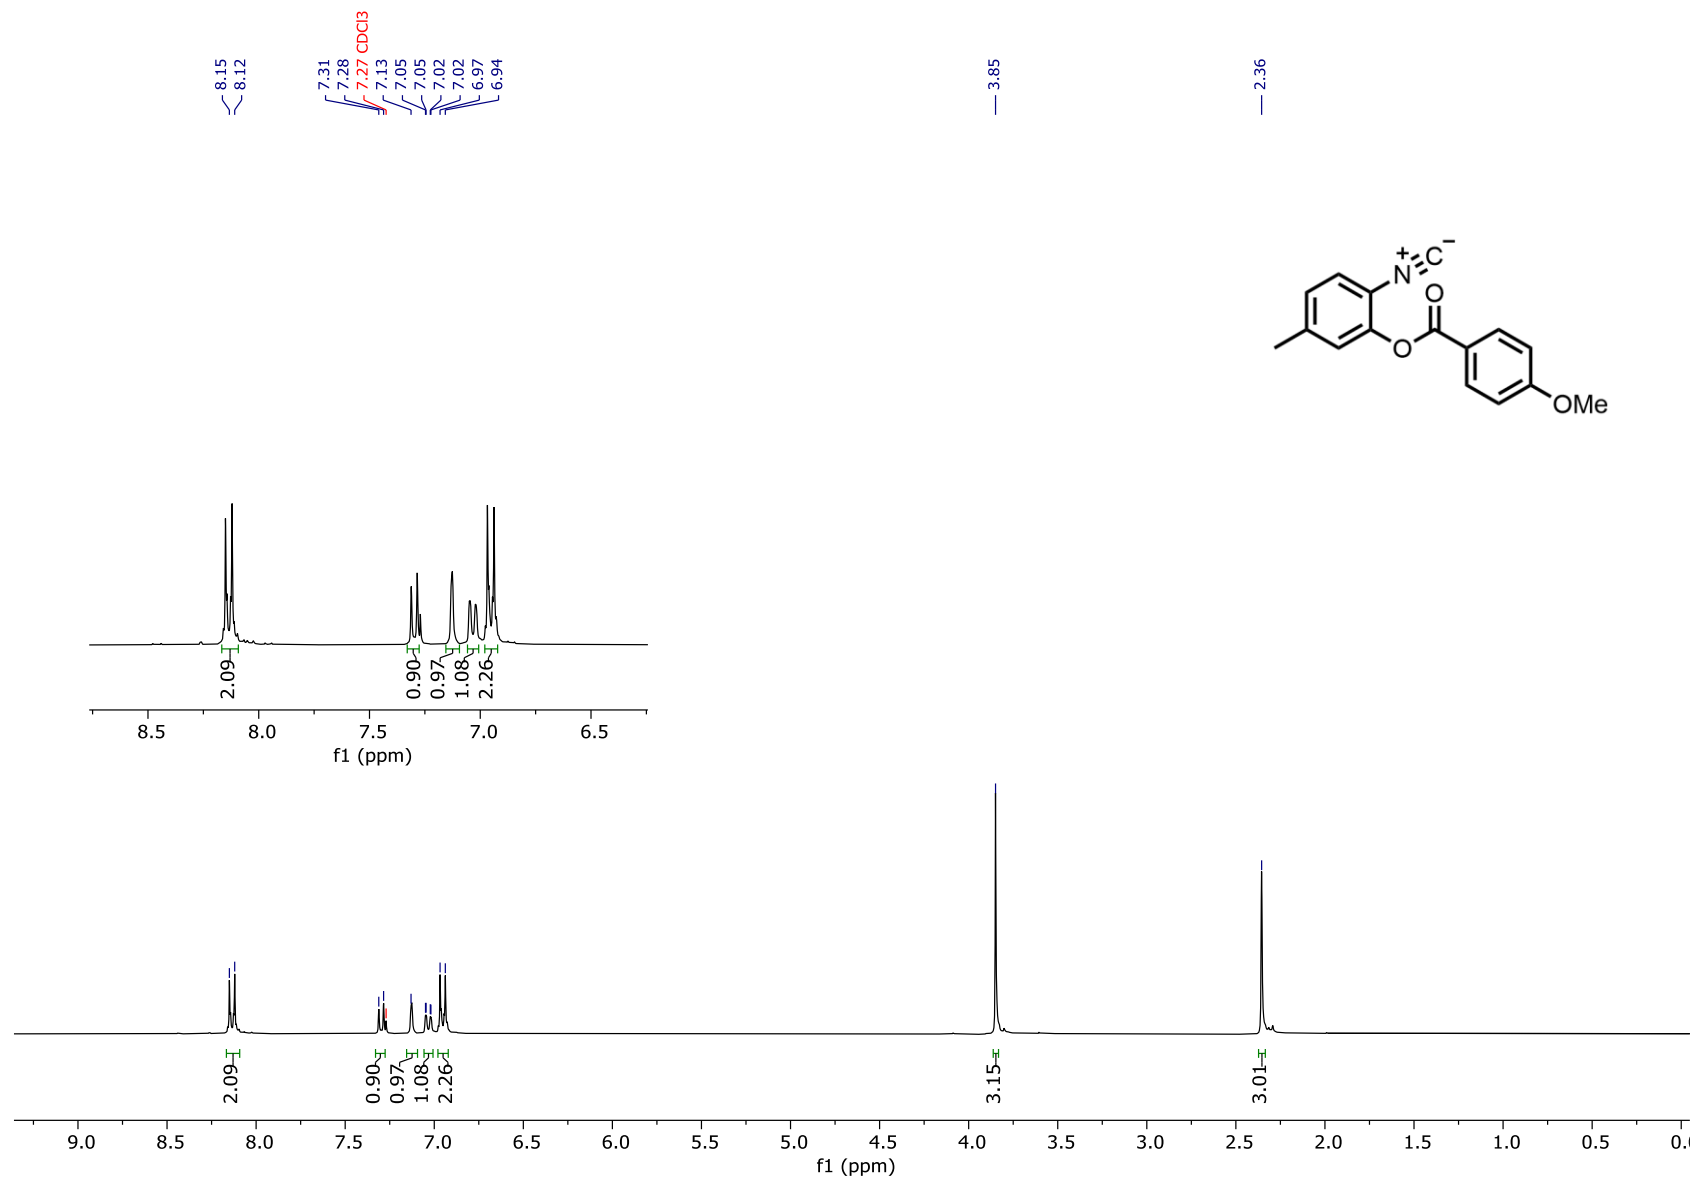

Figure S6. <sup>1</sup>H NMR (300 MHz, CDCl<sub>3</sub>) 2-isocyano-5-methylphenyl 4-methoxybenzoate (1b).

# Supporting Information

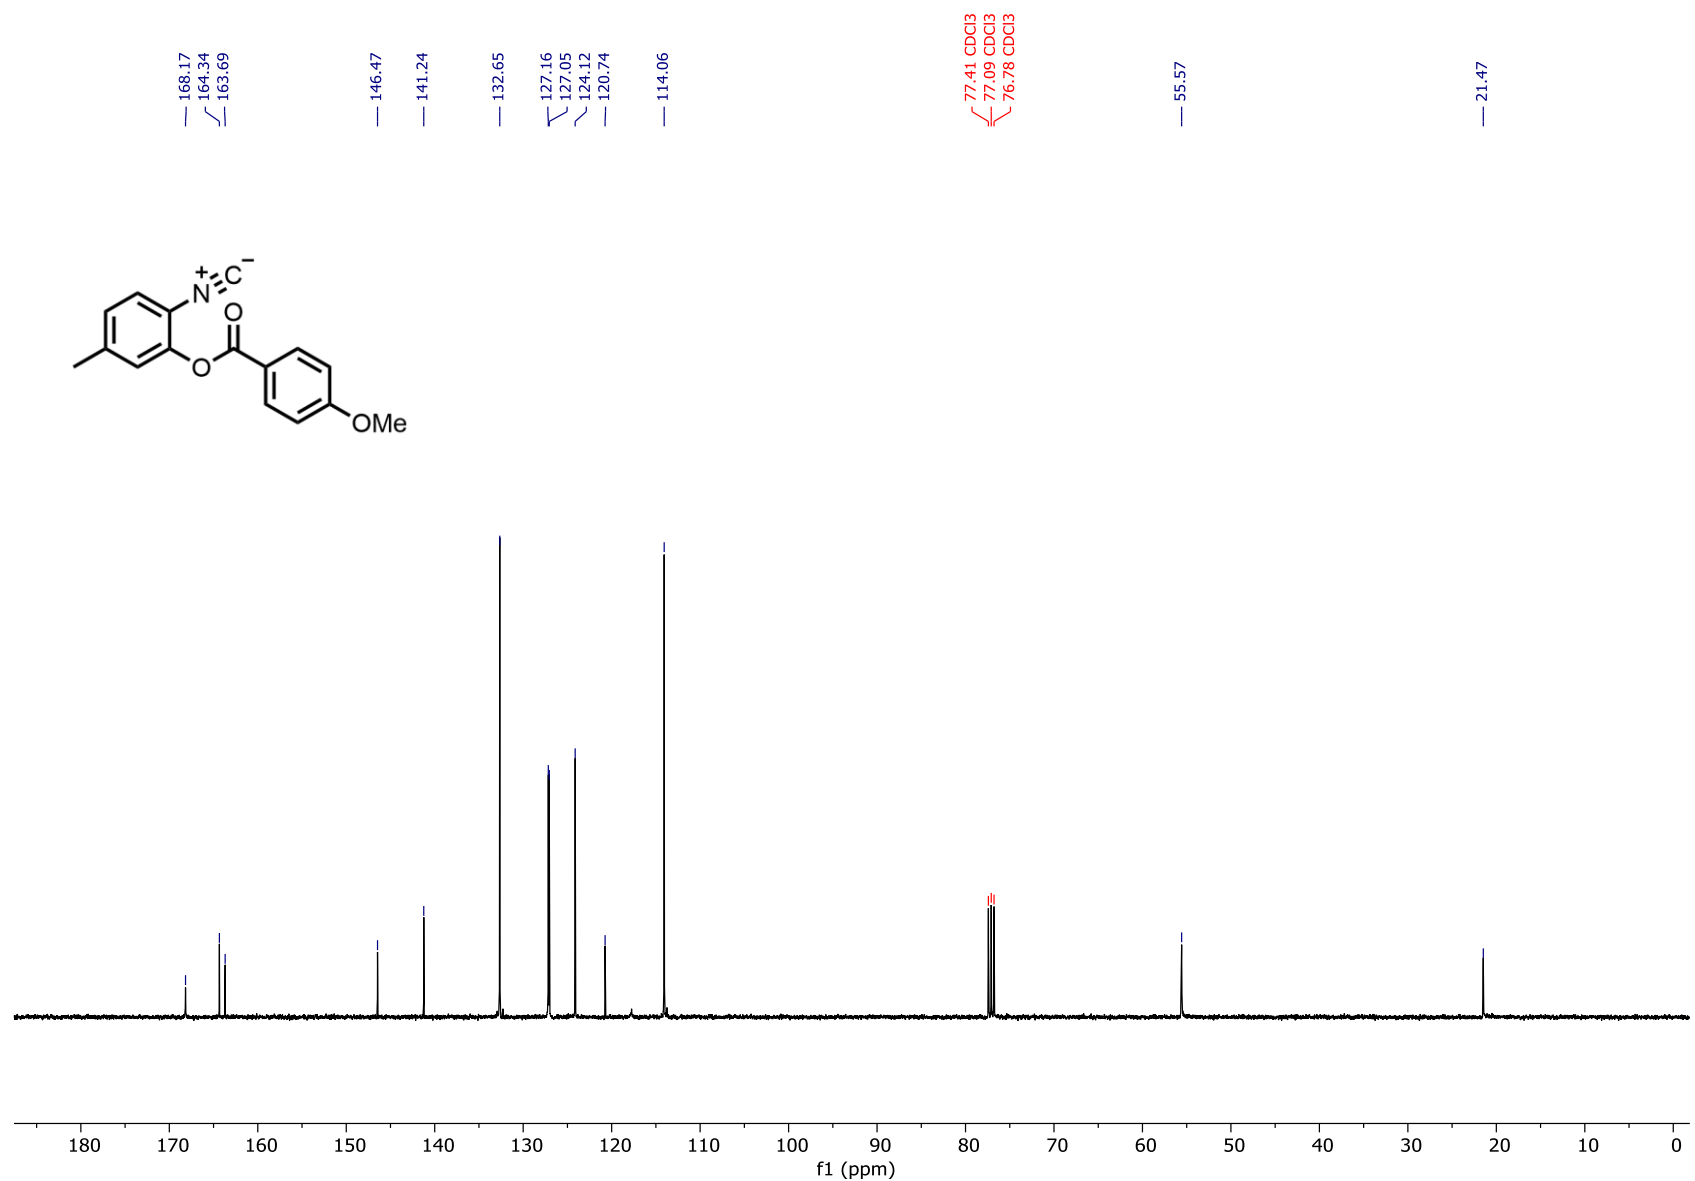

Figure S7. <sup>13</sup>C NMR (101 MHz, CDCl<sub>3</sub>) 2-isocyano-5-methylphenyl 4-methoxybenzoate (1b).

## Supporting Information

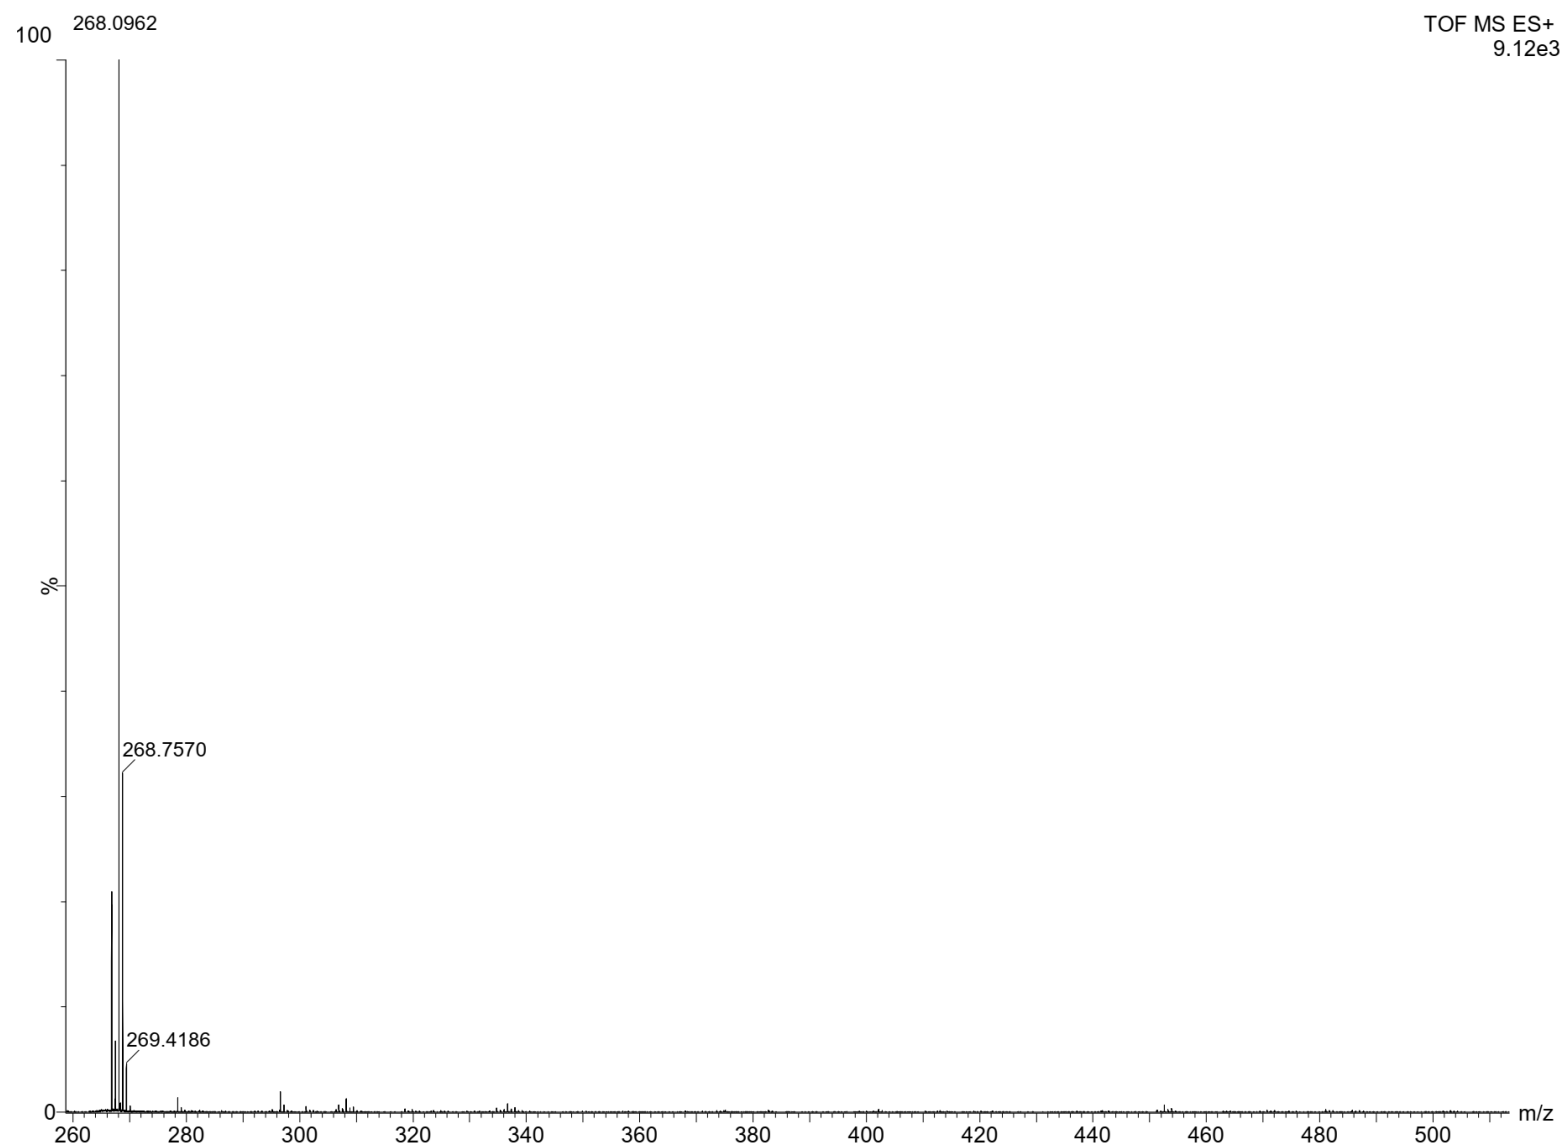

Figure S8. HRMS-ESI 2-isocyano-5-methylphenyl 4-methoxybenzoate (1b).

# Supporting Information

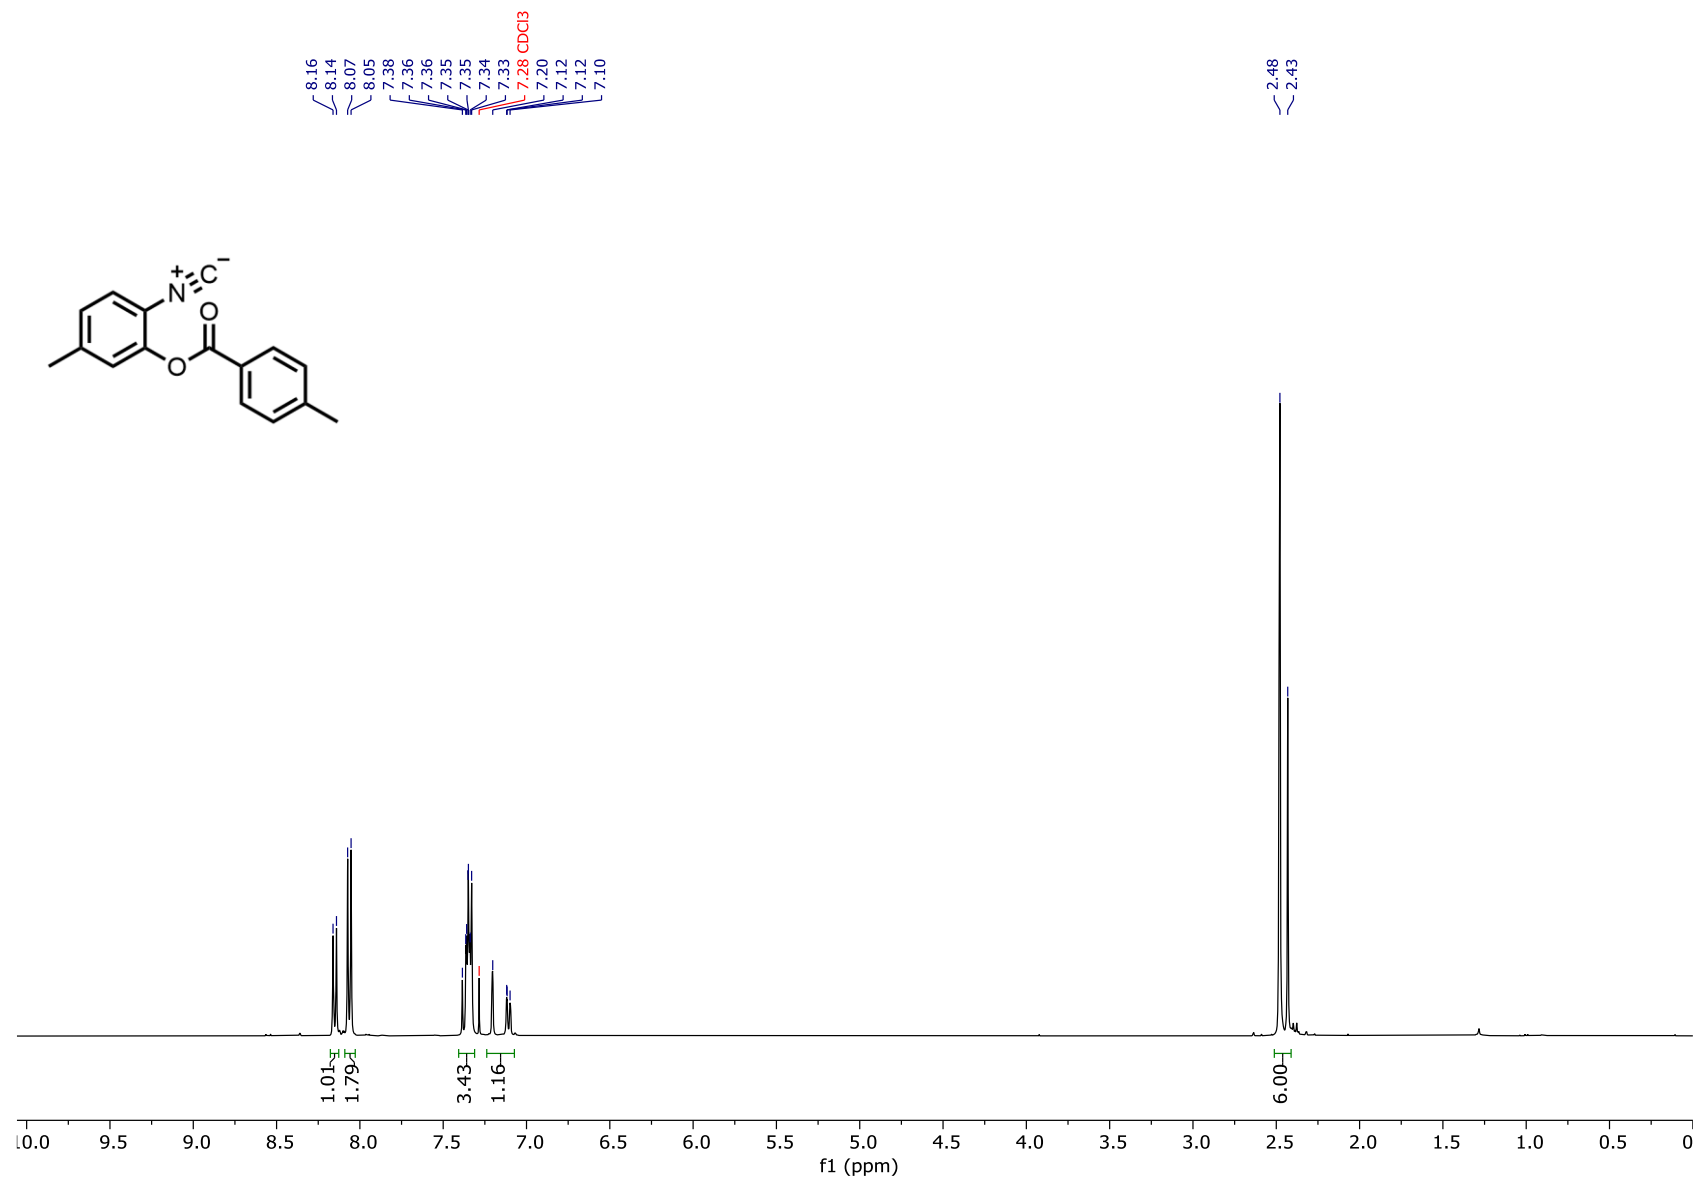

Figure S9. <sup>1</sup>H NMR (400 MHz, CDCl<sub>3</sub>) 2-isocyanato-5-methylphenyl 4-methylbenzoate (1c).

# Supporting Information

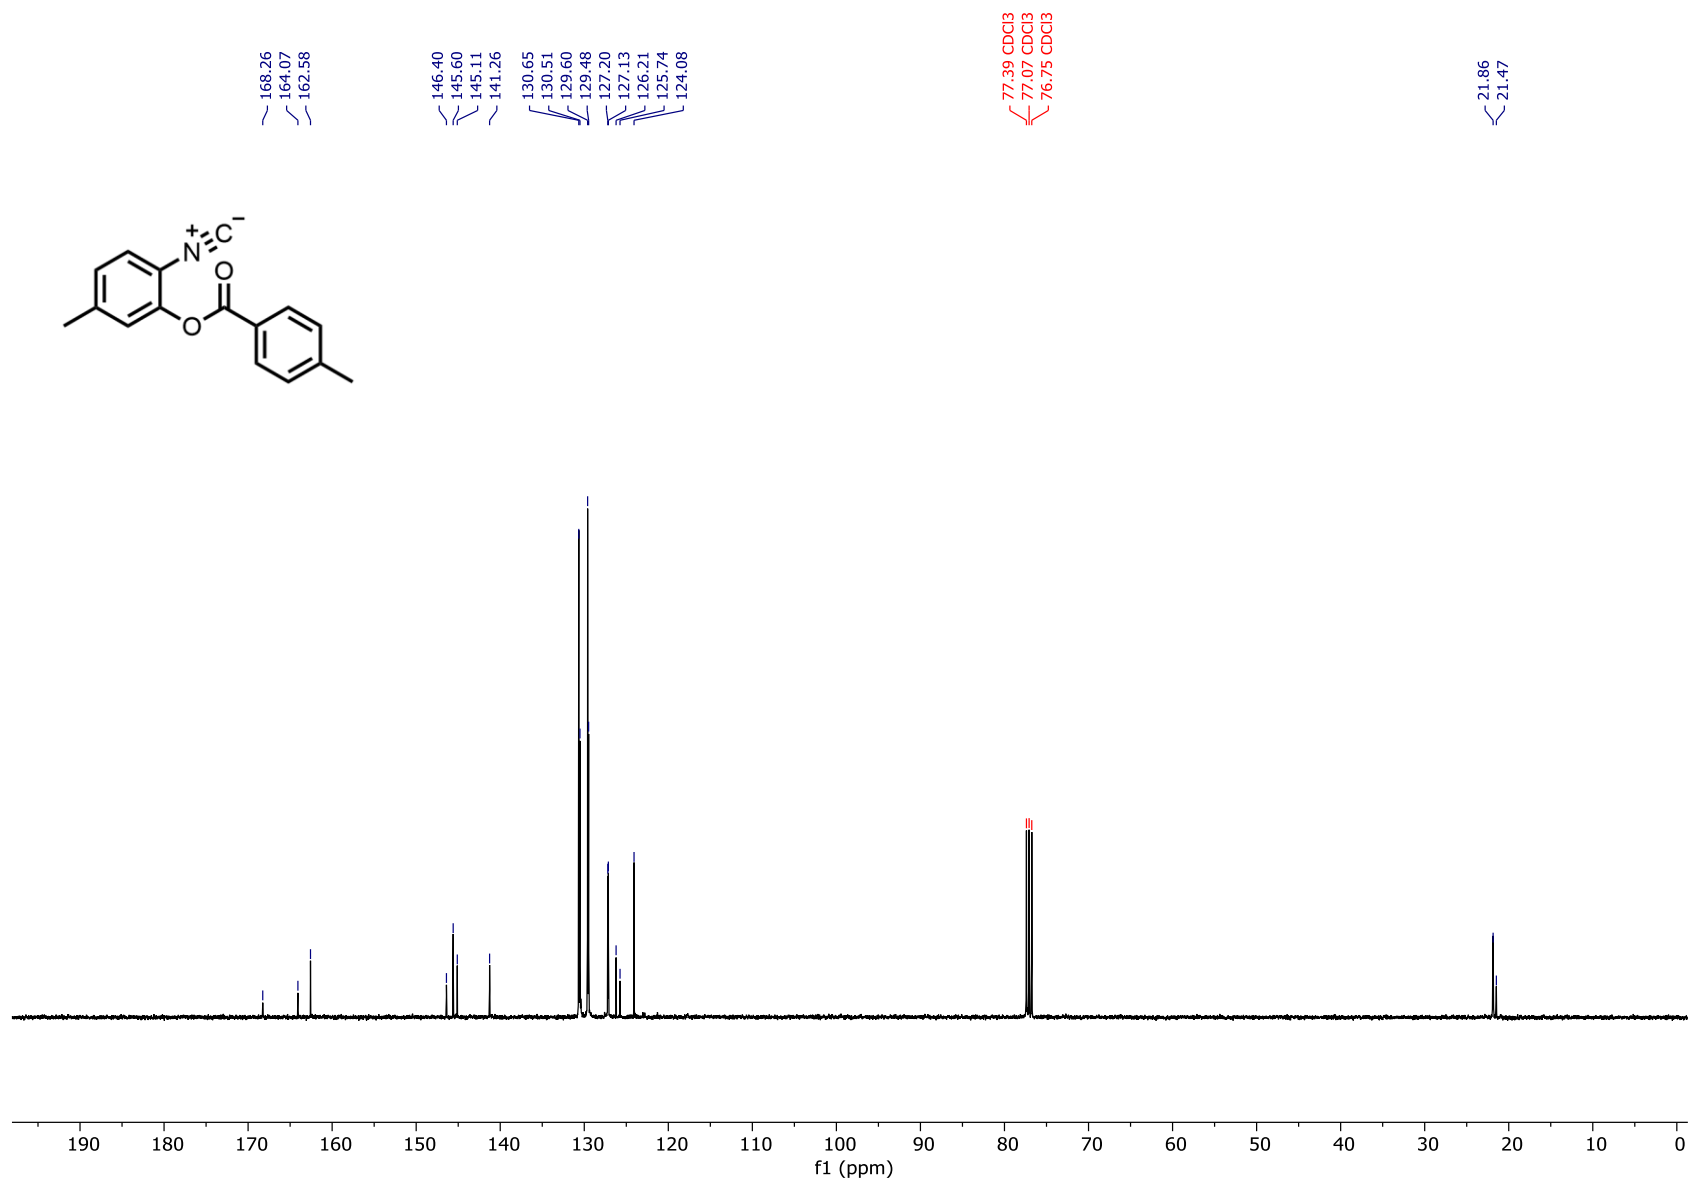

Figure S10.  $^{13}\text{C}$  NMR (101 MHz,  $\text{CDCl}_3$ ) 2-isocyano-5-methylphenyl 4-methylbenzoate (1c).

## Supporting Information

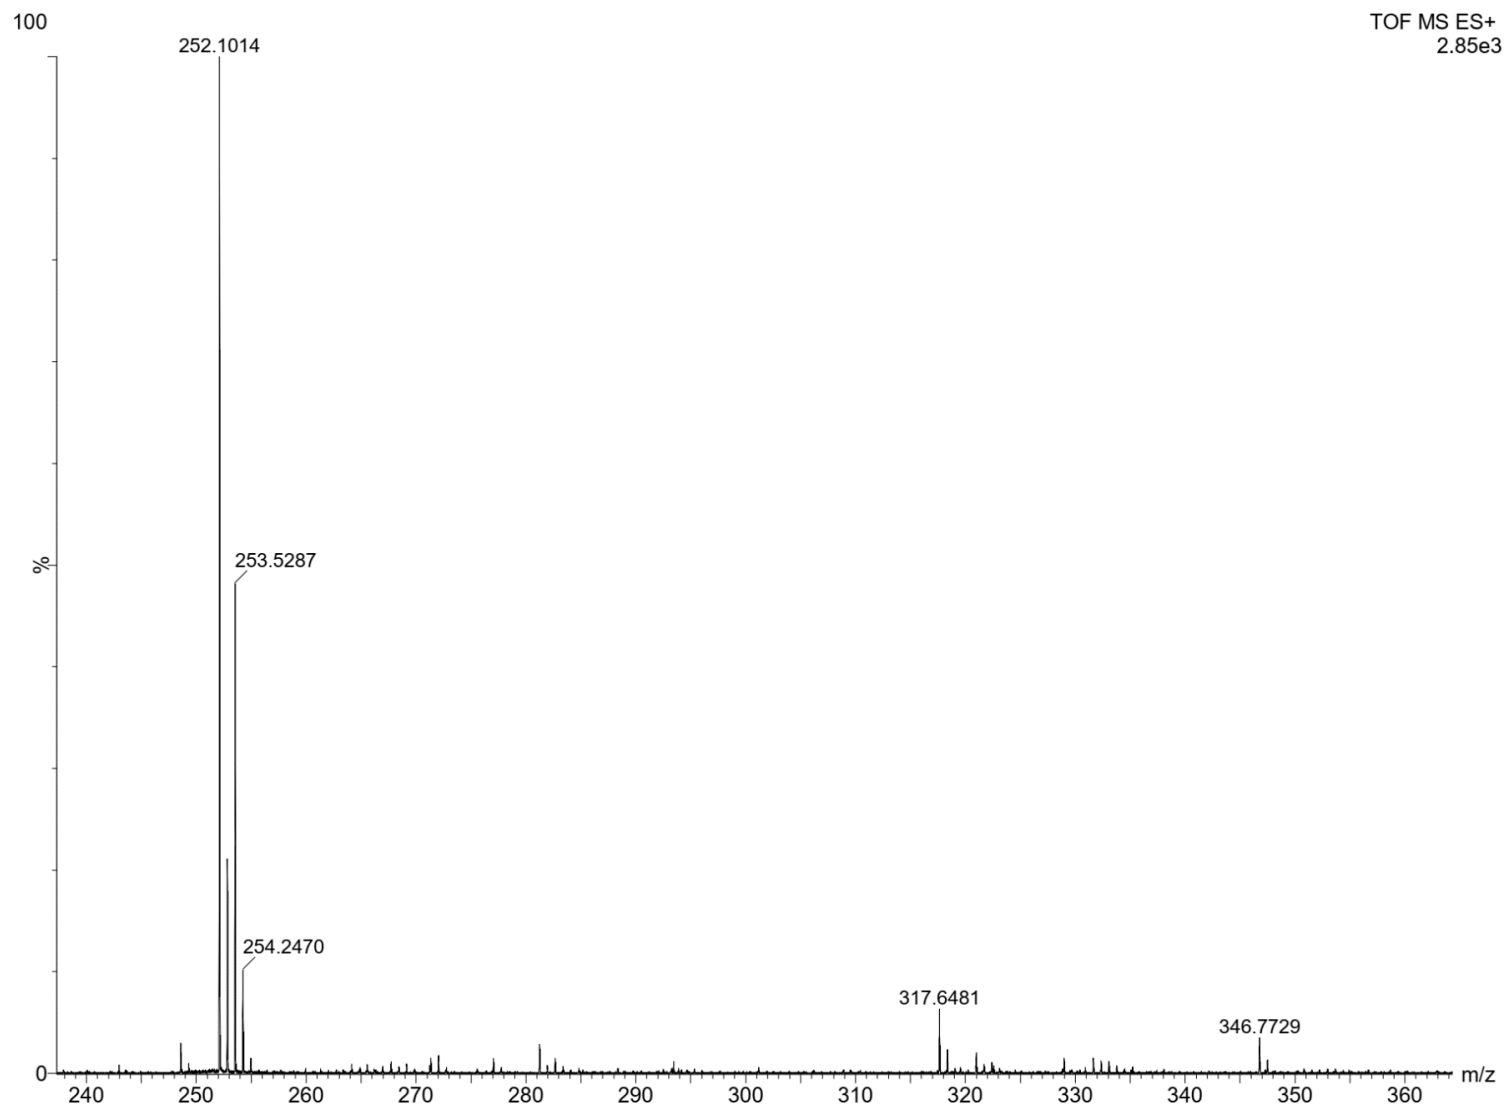

Figure S11. HRMS-ESI 2-isocyano-5-methylphenyl 4-methylbenzoate (1c).

# Supporting Information

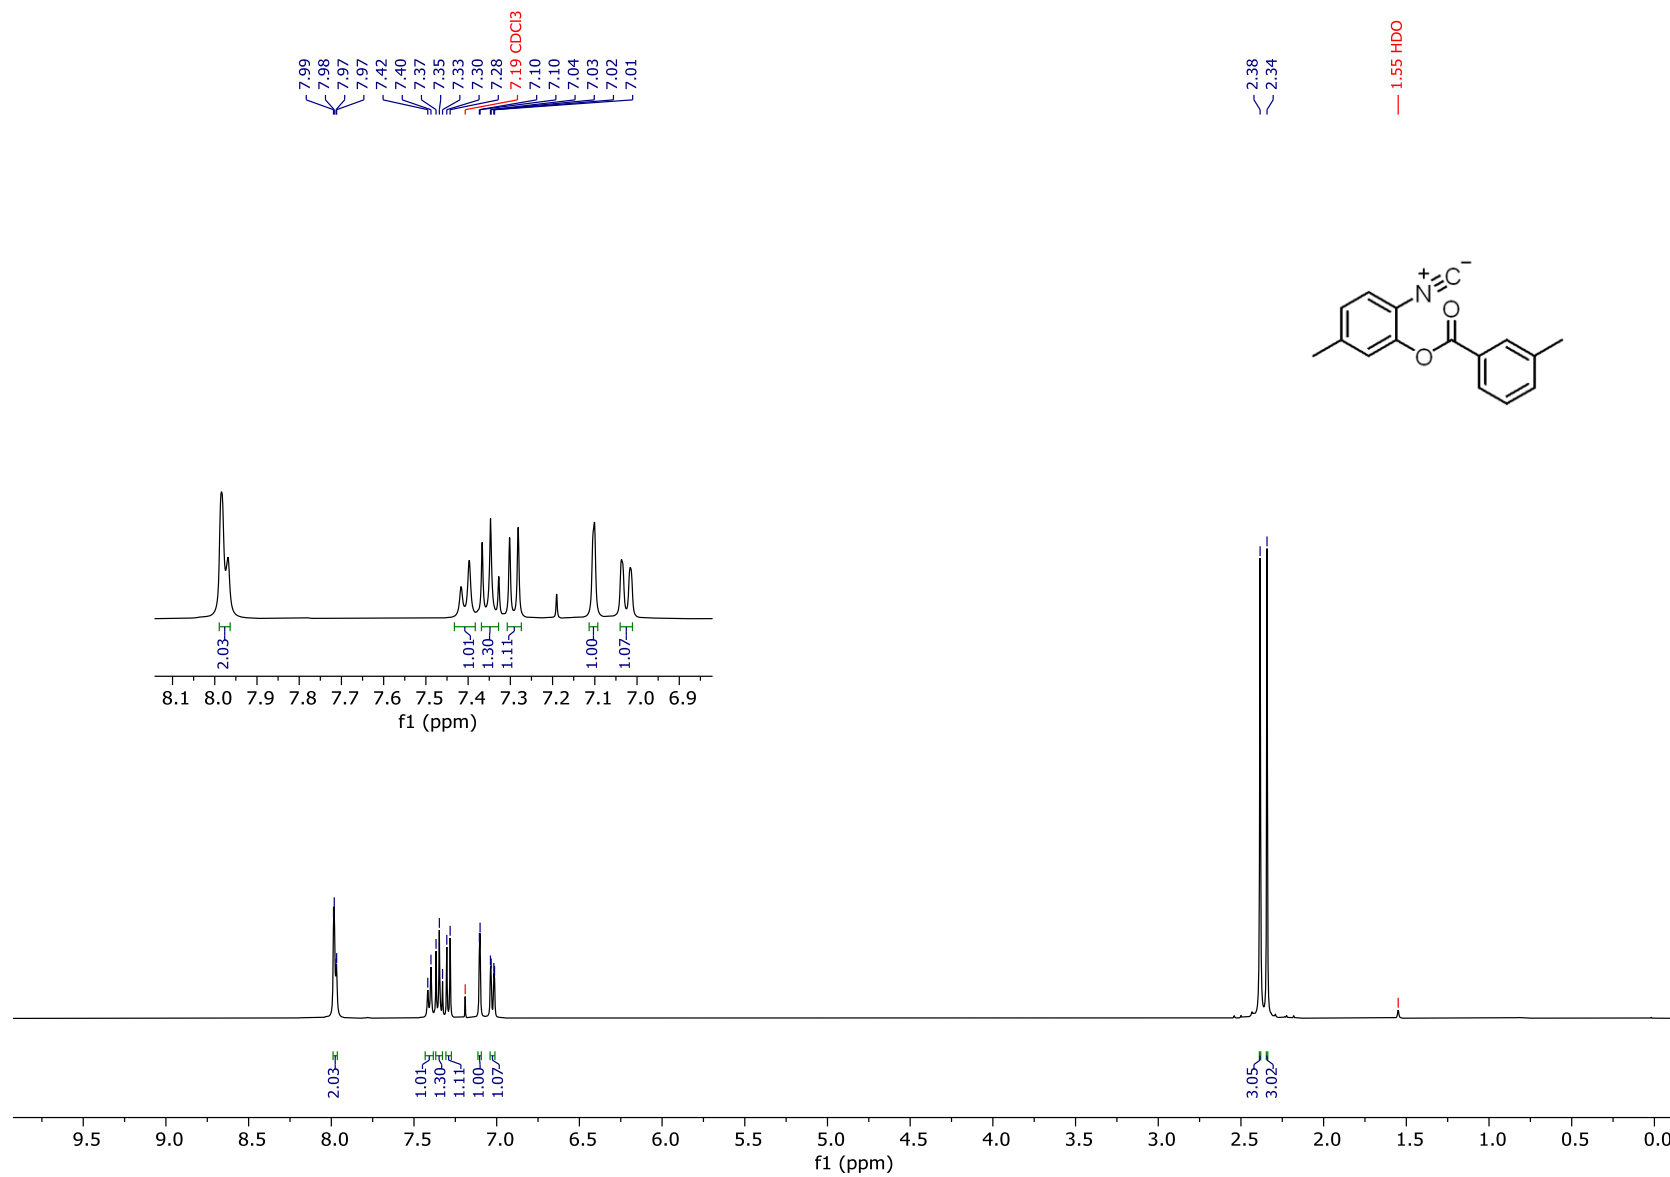

Figure S12. <sup>1</sup>H NMR (400 MHz, CDCl<sub>3</sub>) 2-isocyano-5-methylphenyl 3-methylbenzoate (1d).



# Supporting Information

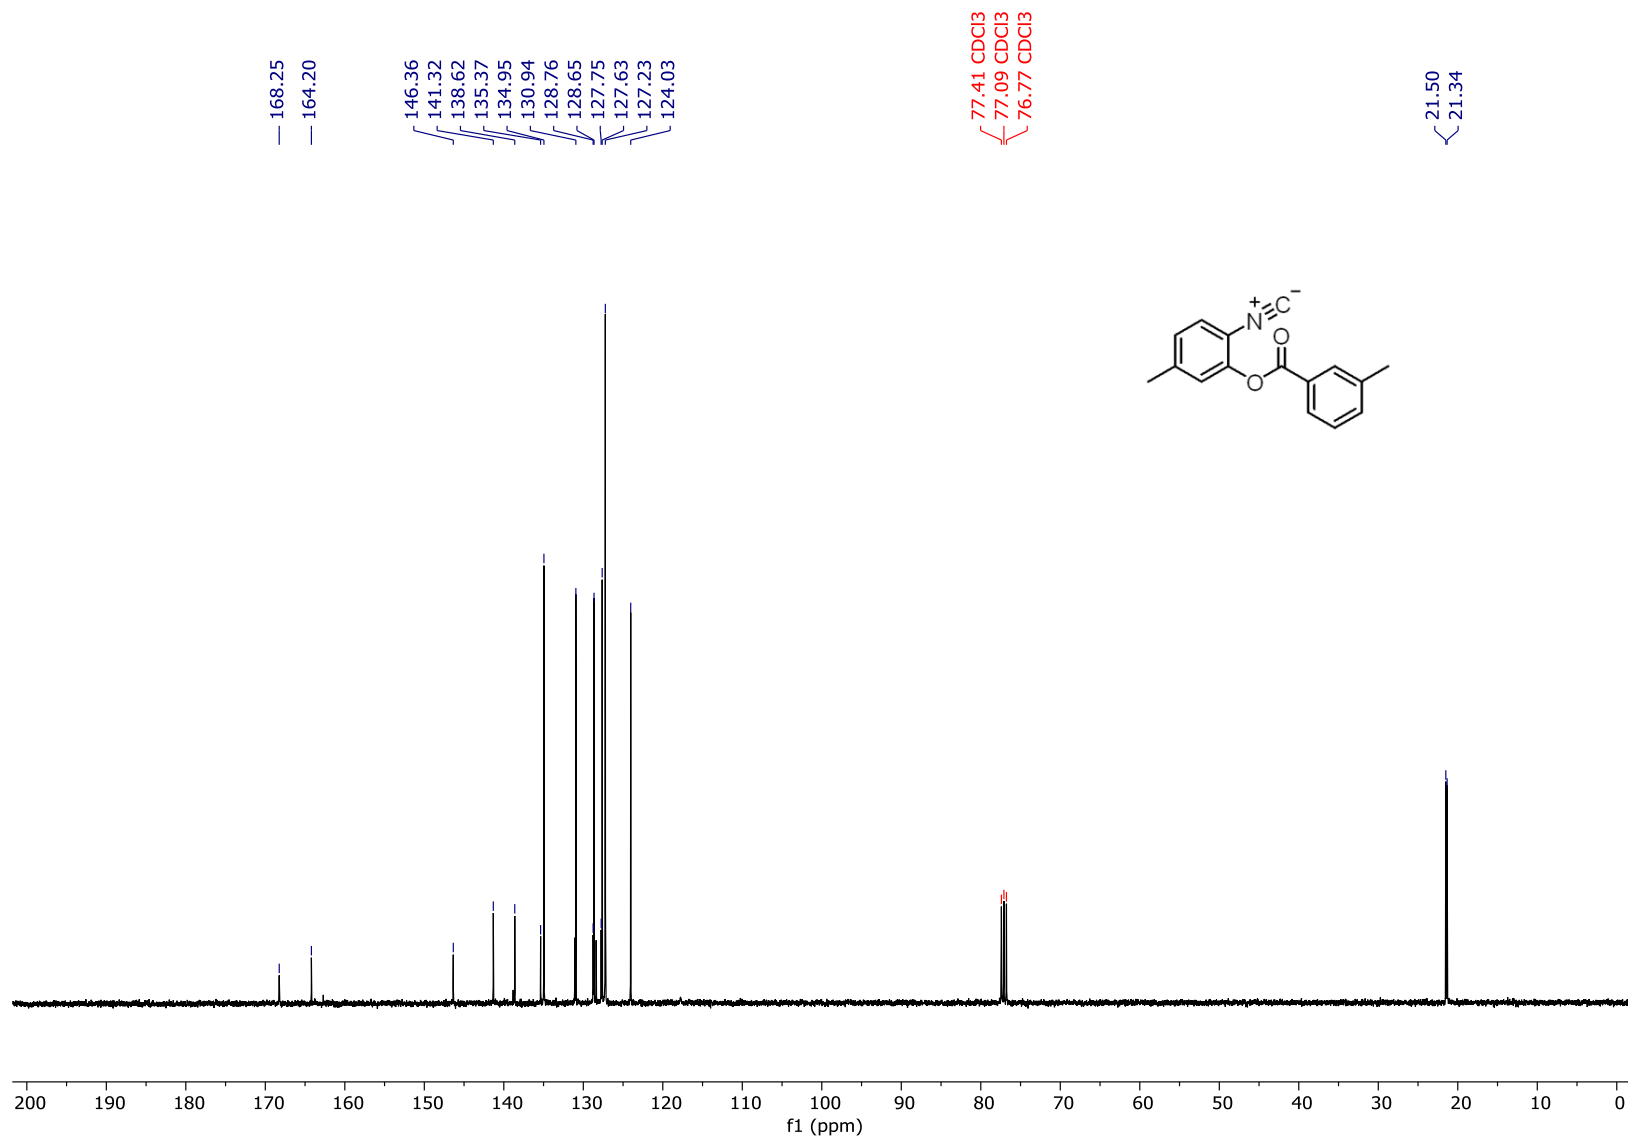

## Supporting Information

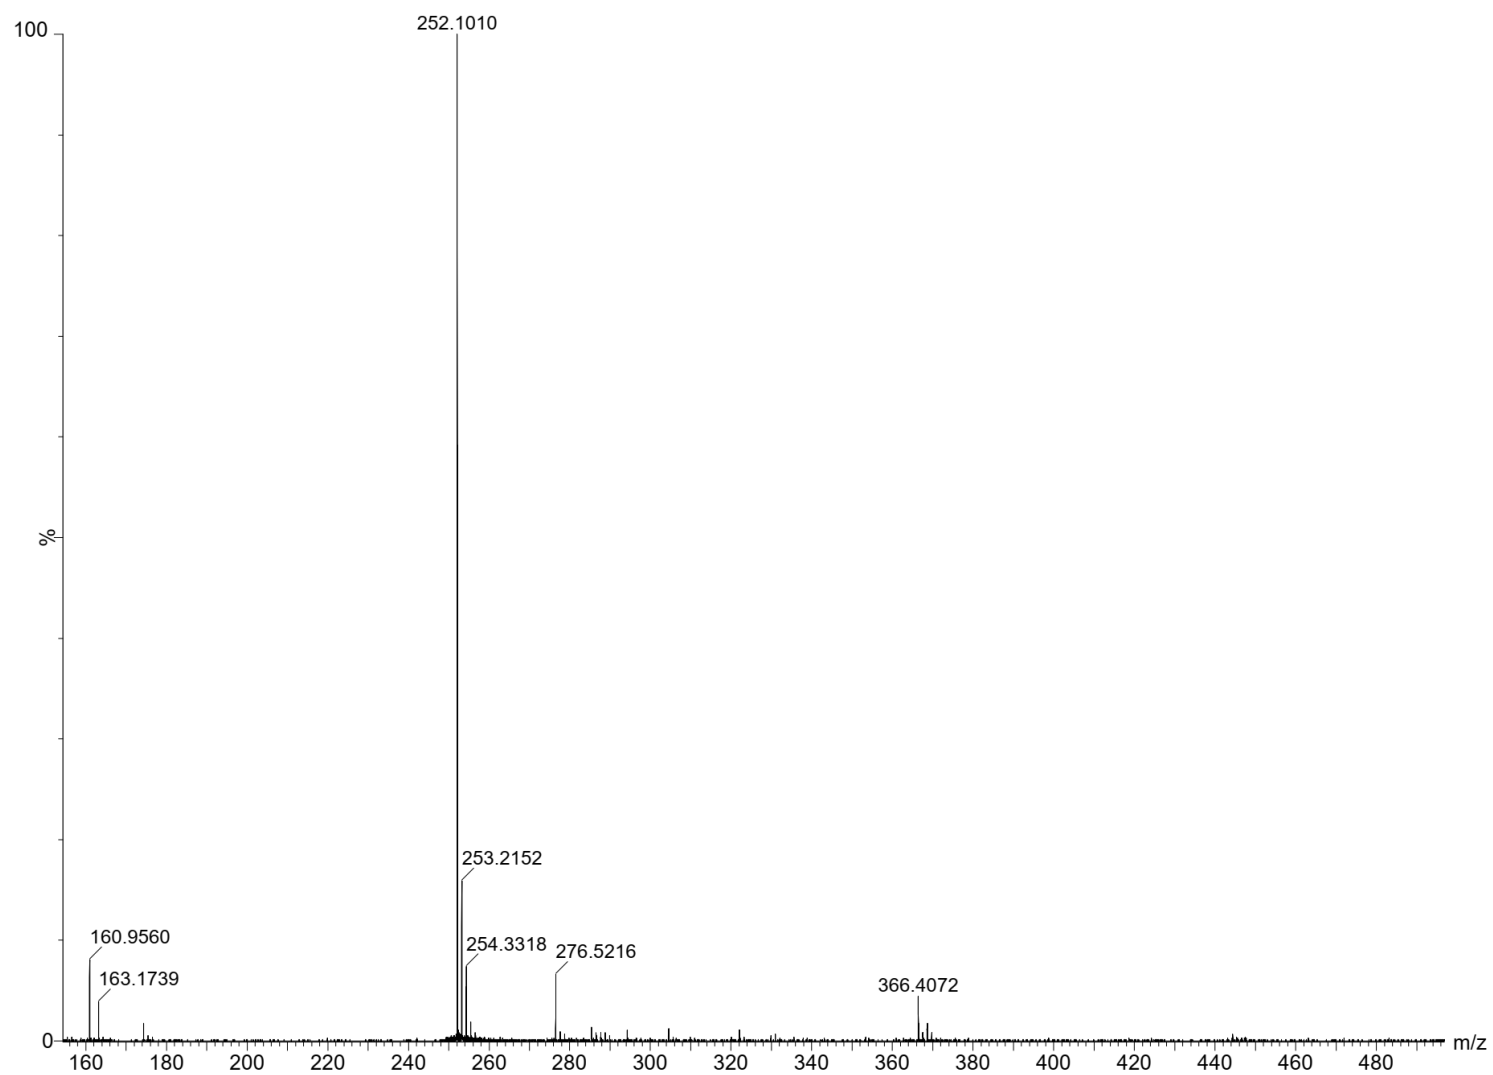

Figure S14. HRMS-ESI 2-isocyano-5-methylphenyl 4-methylbenzoate (1d).

# Supporting Information

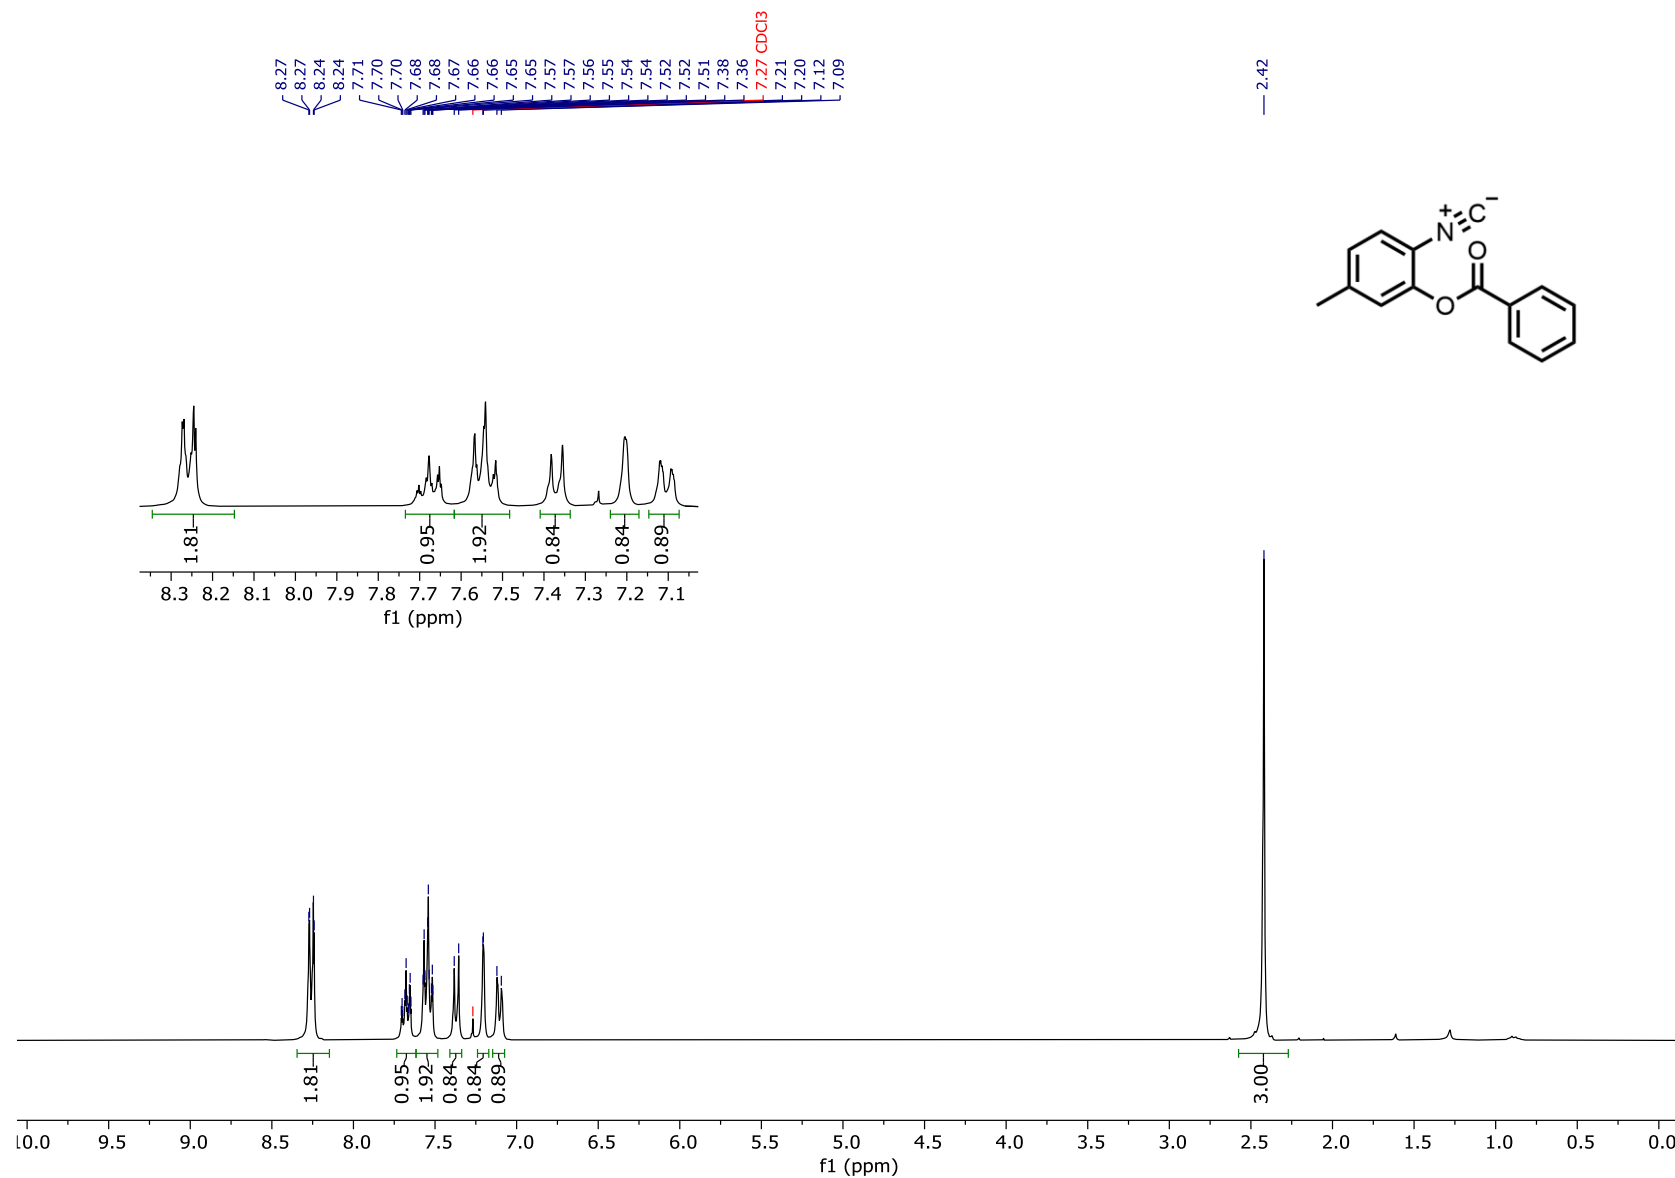

Figure S15. <sup>1</sup>H NMR (300 MHz, CDCl<sub>3</sub>) 2-isocyano-5-methylphenyl benzoate (1e).

# Supporting Information

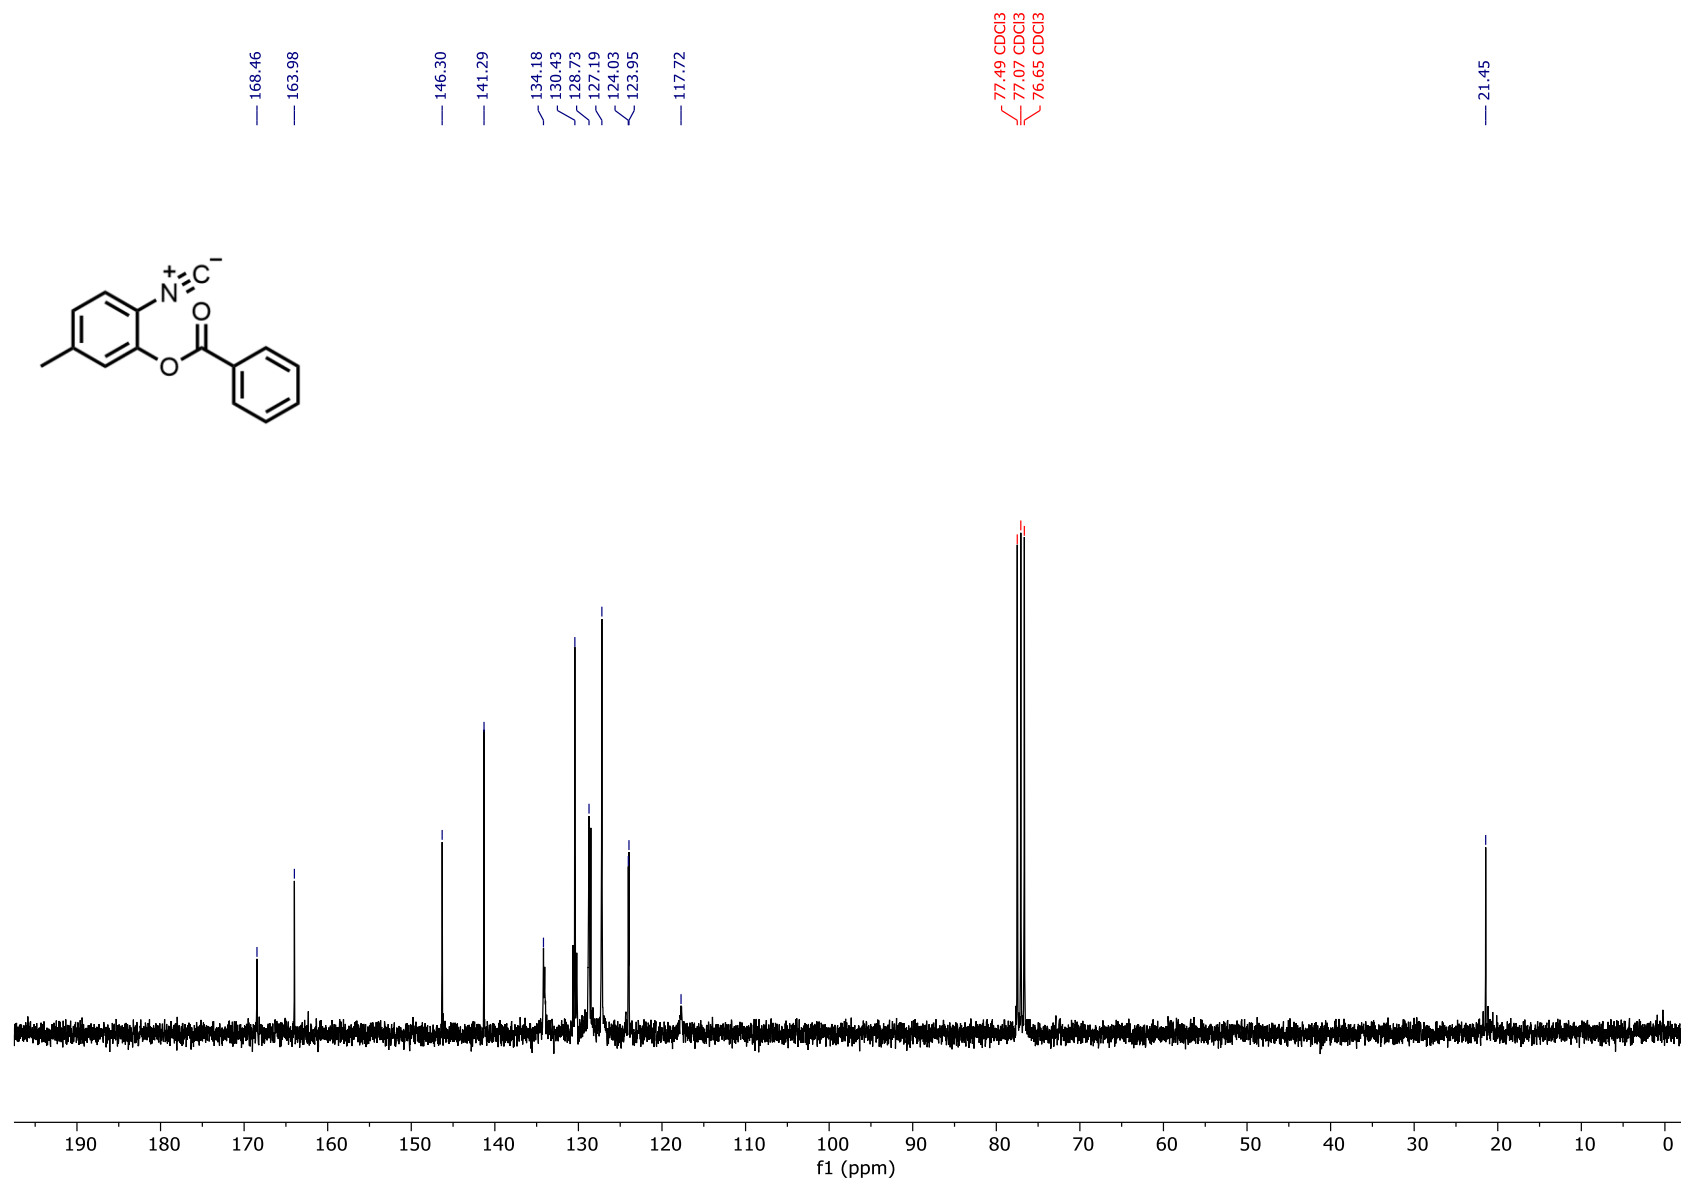

Figure S16. <sup>13</sup>C NMR (75 MHz, CDCl<sub>3</sub>) 2-isocyano-5-methylphenyl benzoate (1e)..

# Supporting Information

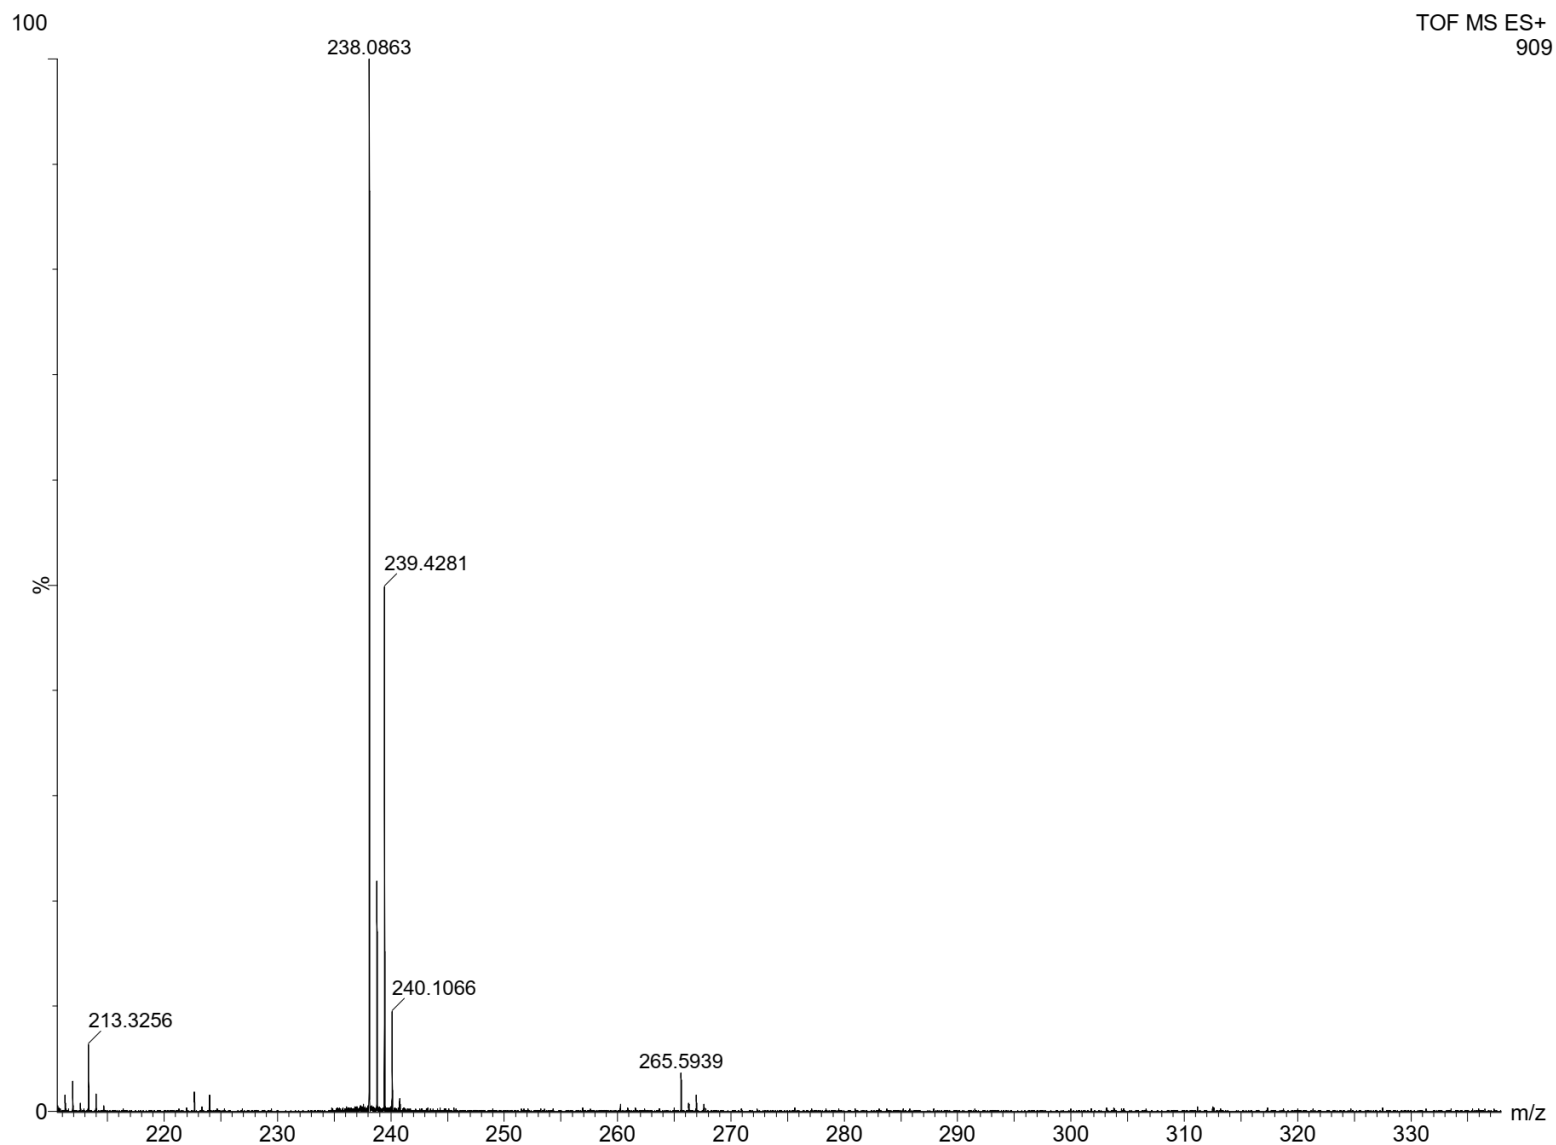

Figure S17. HRMS-ESI 2-isocyano-5-methylphenyl benzoate (1e).

# Supporting Information

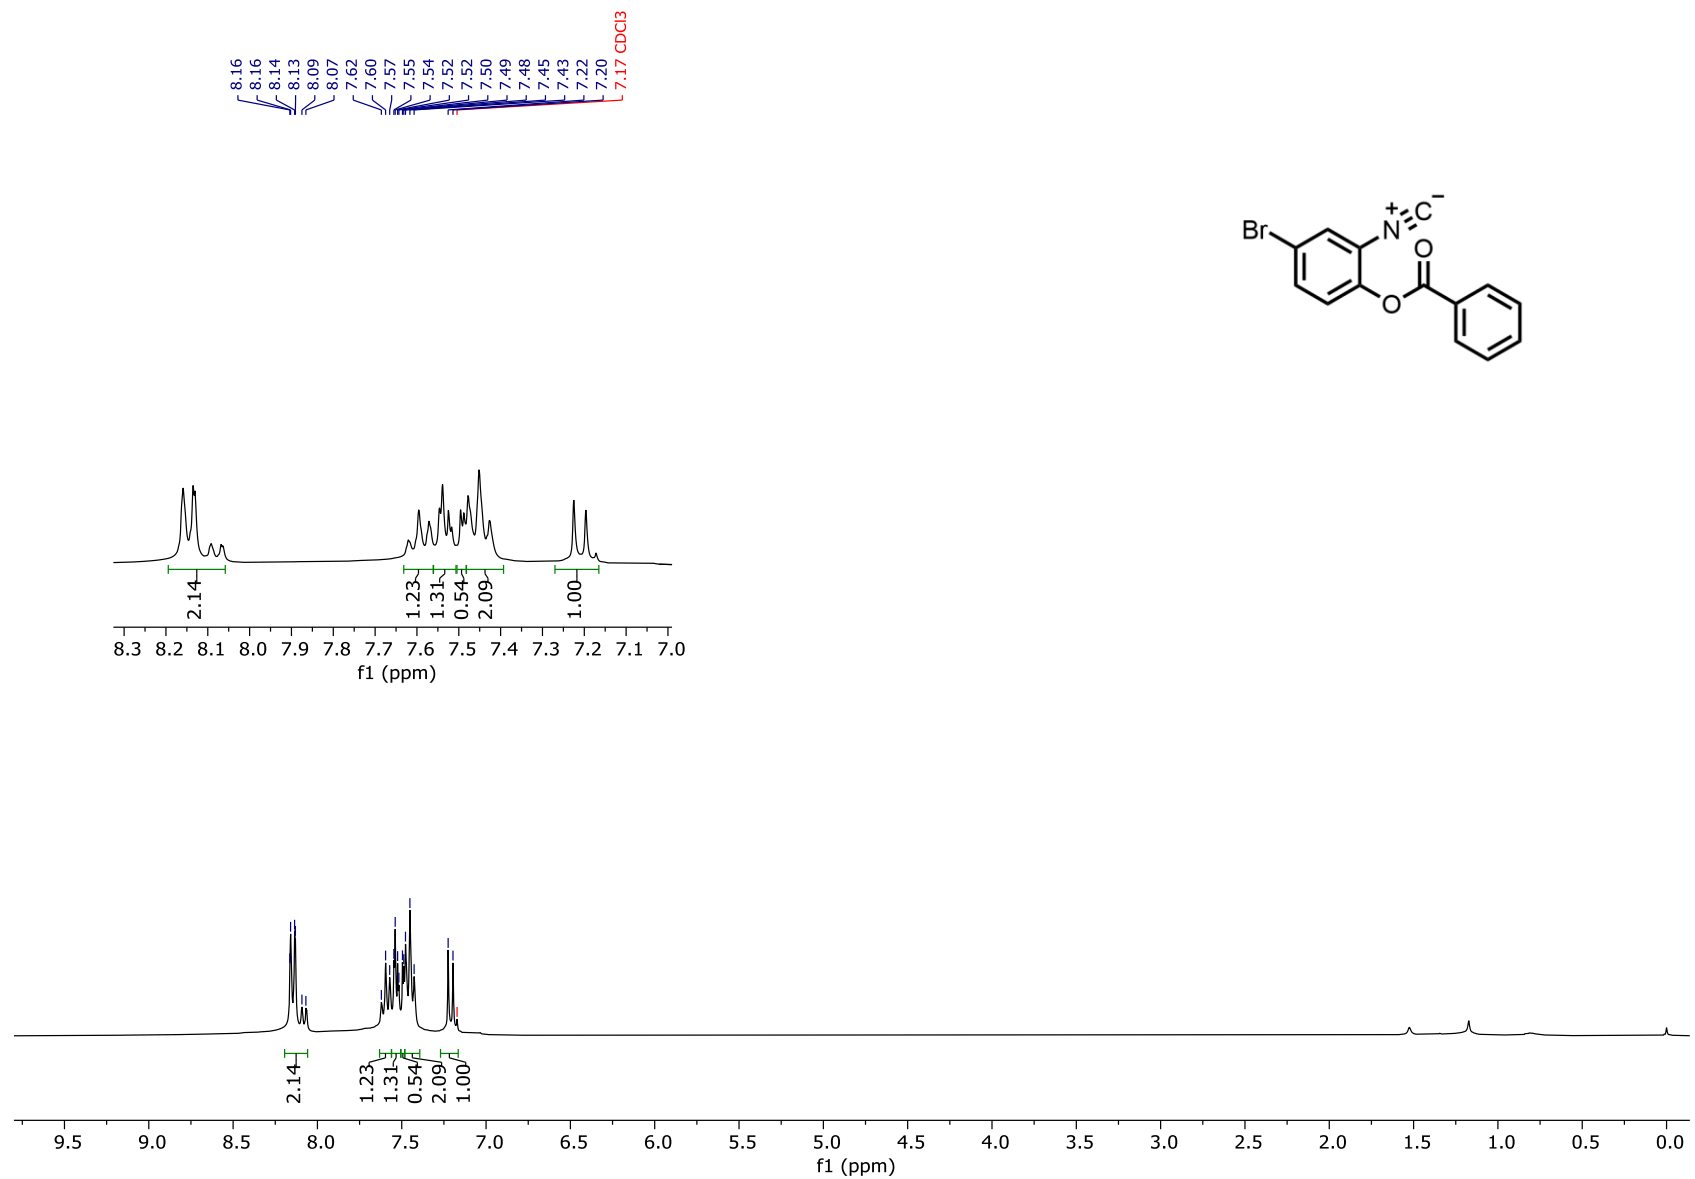

Figure S18. <sup>1</sup>H NMR (300 MHz, CDCl<sub>3</sub>) 4-bromo-2-isocyanophenyl benzoate (1f).

# Supporting Information

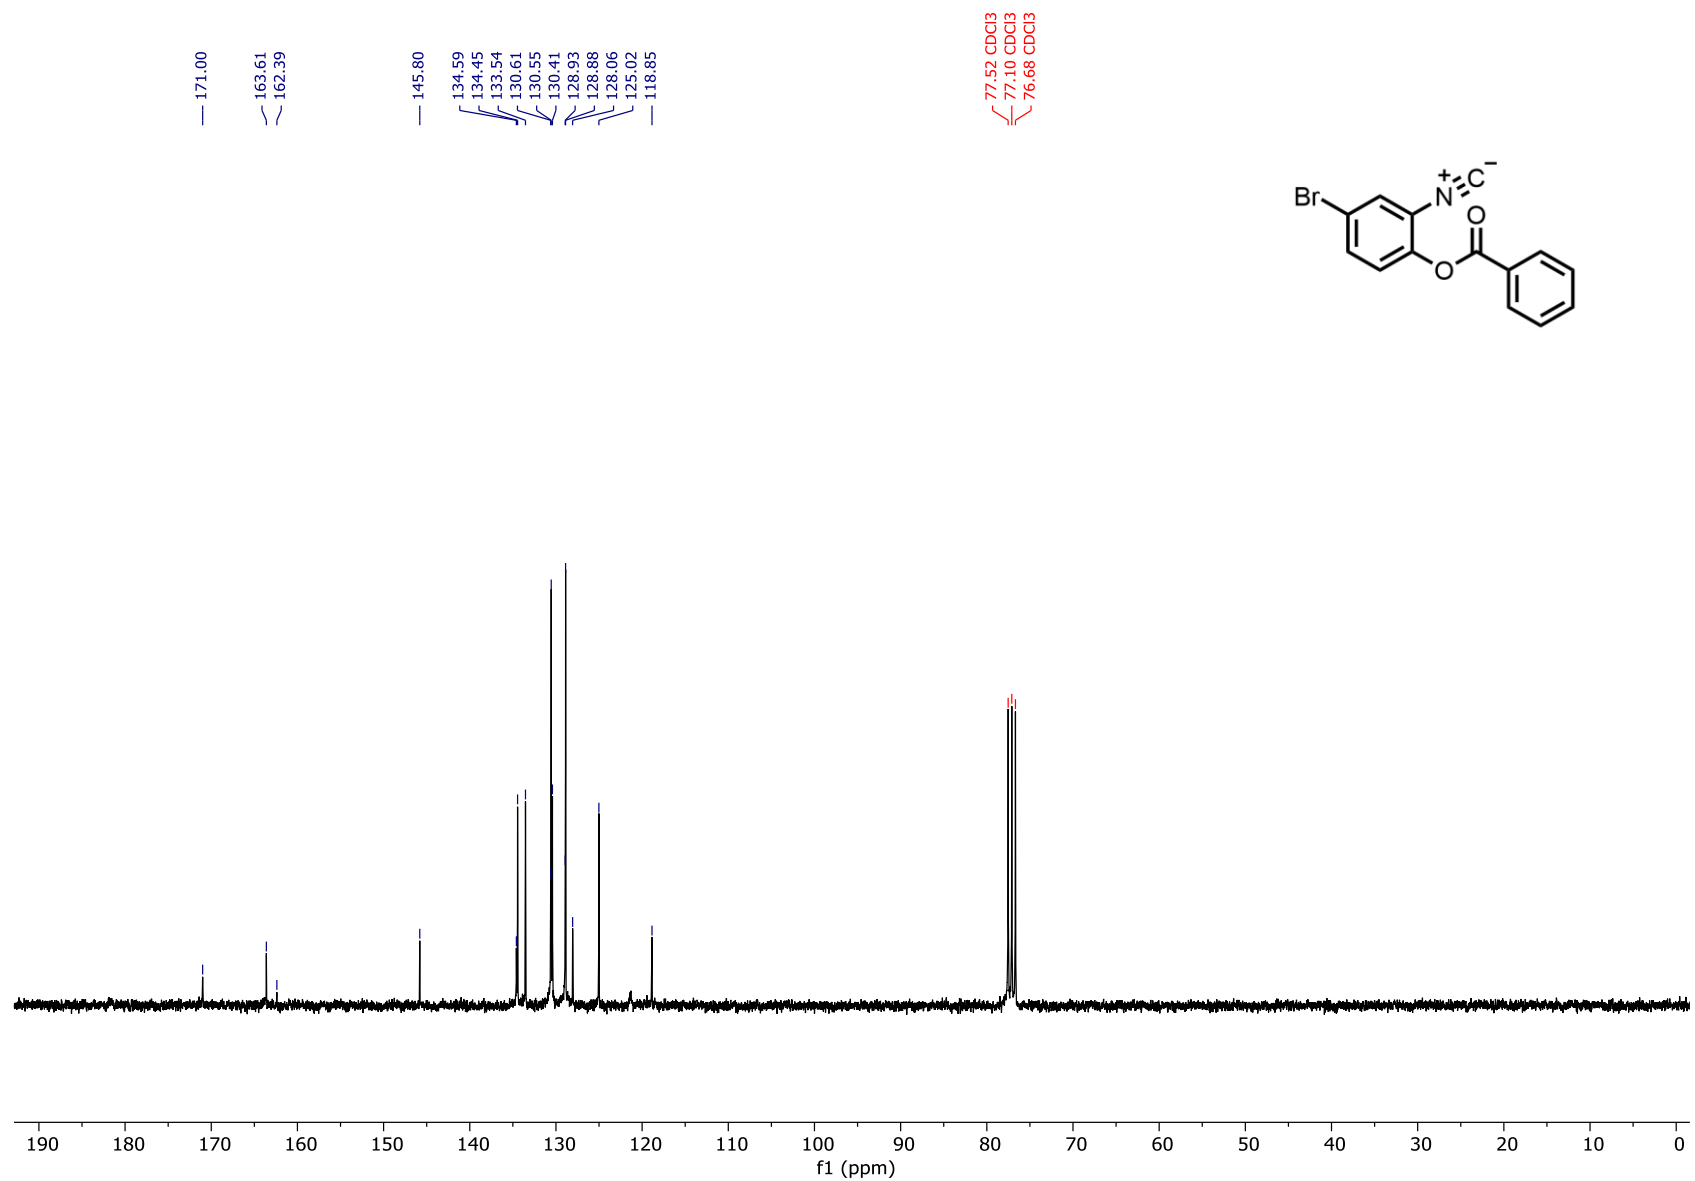

Figure S19.  $^{13}\text{C}$  NMR (75 MHz,  $\text{CDCl}_3$ ) 4-bromo-2-isocyanophenyl benzoate (1f).

## Supporting Information

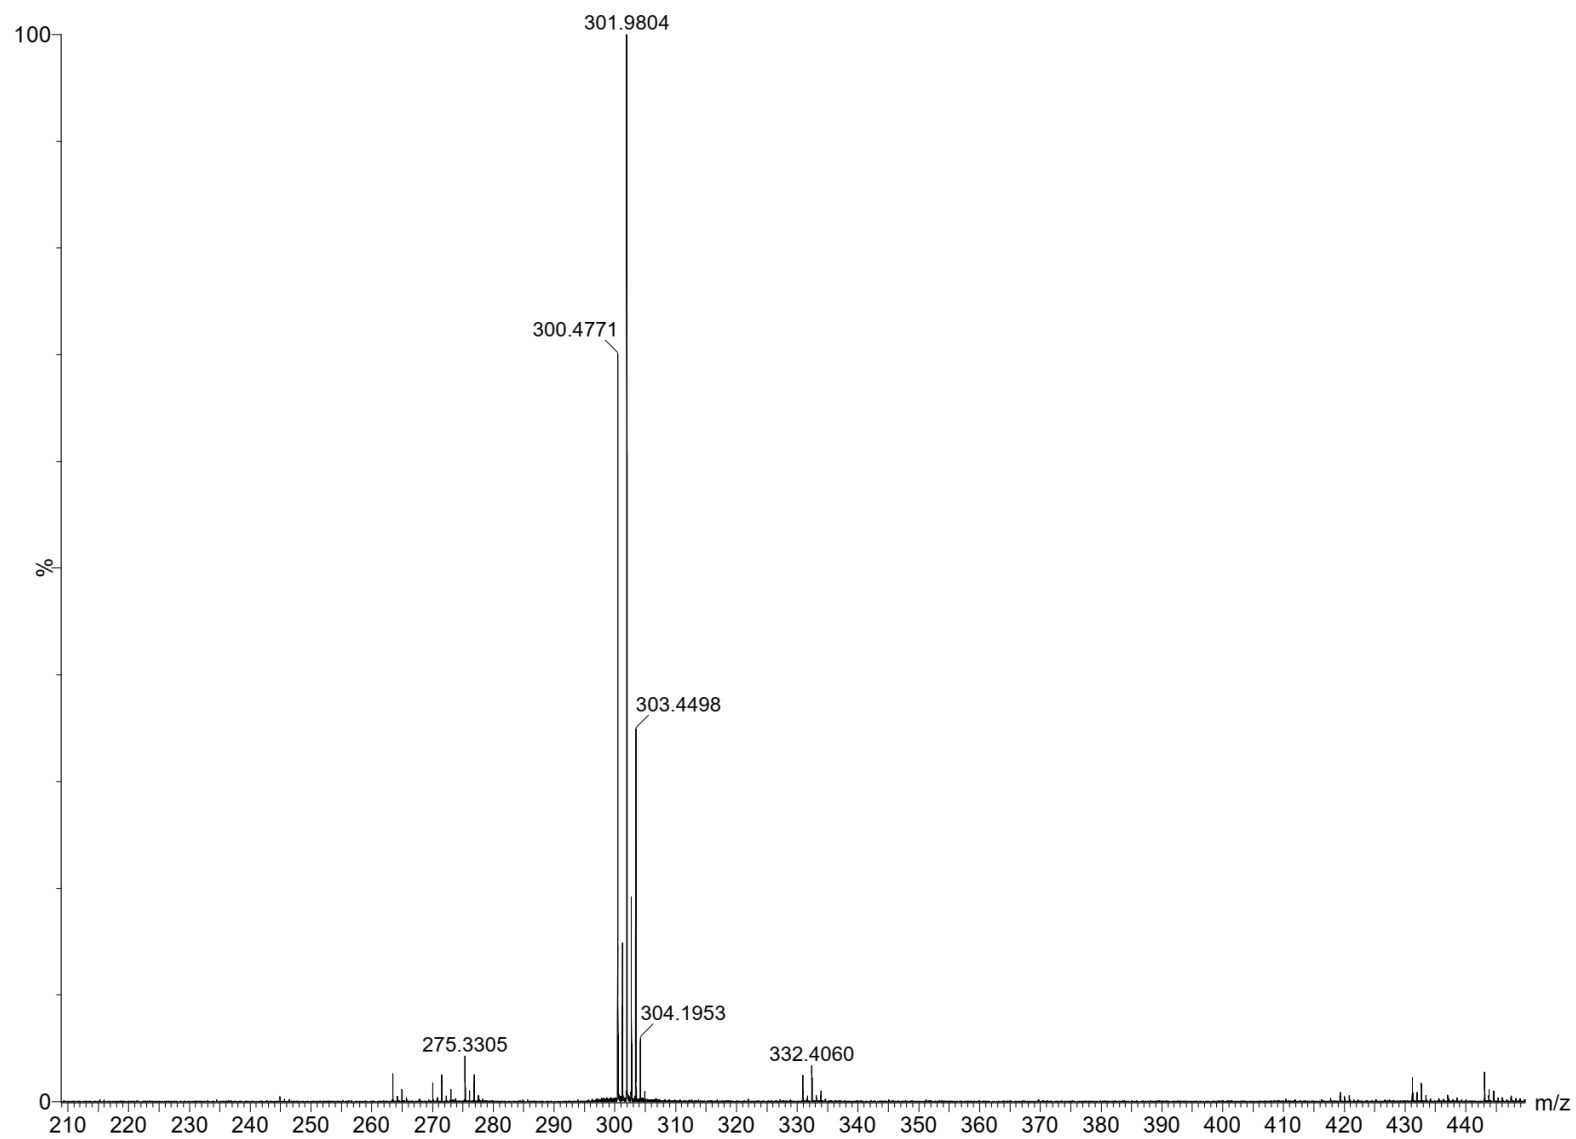

Figure S20. HRMS-ESI 4-bromo-2-isocyanophenyl benzoate (1f).



# Supporting Information

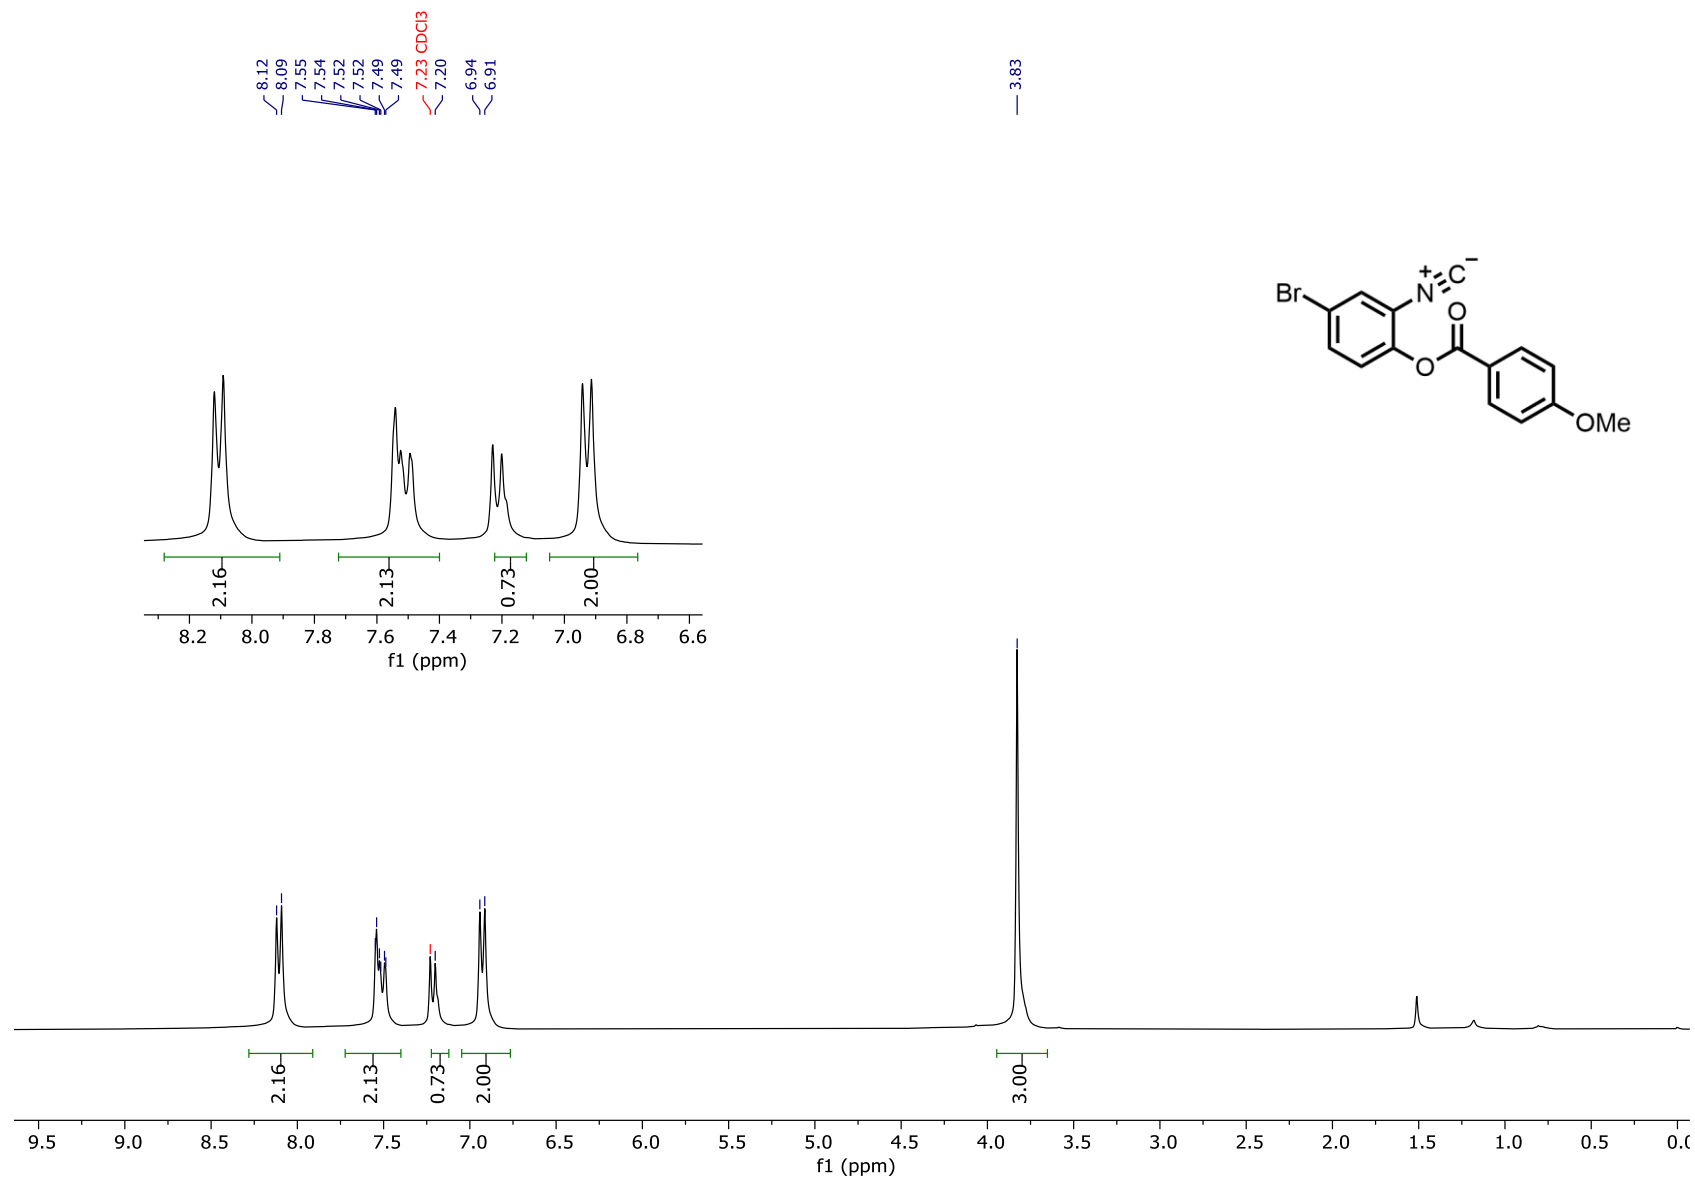

Figure S21. <sup>1</sup>H NMR (300 MHz, CDCl<sub>3</sub>) 4-bromo-2-isocyanophenyl 4-methoxybenzoate (1g).

# Supporting Information

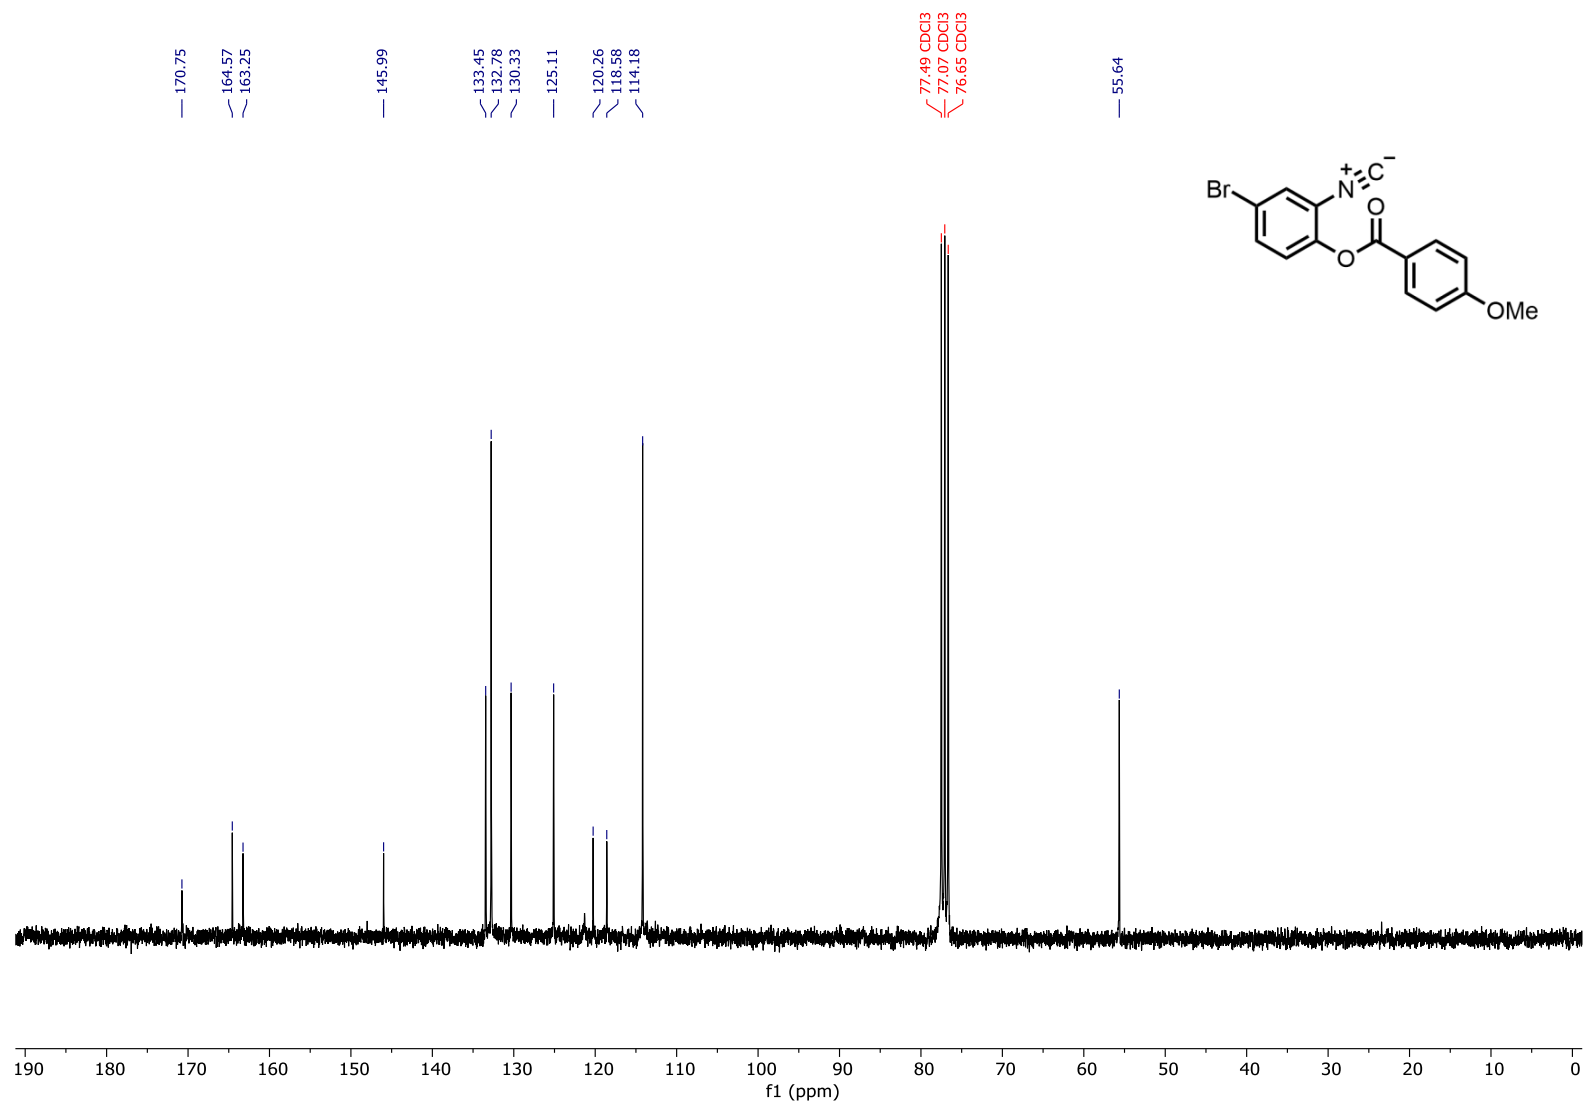

Figure S22.  $^{13}\text{C}$  NMR (75 MHz,  $\text{CDCl}_3$ ) 4-bromo-2-isocyanophenyl 4-methoxybenzoate (1g).

# Supporting Information

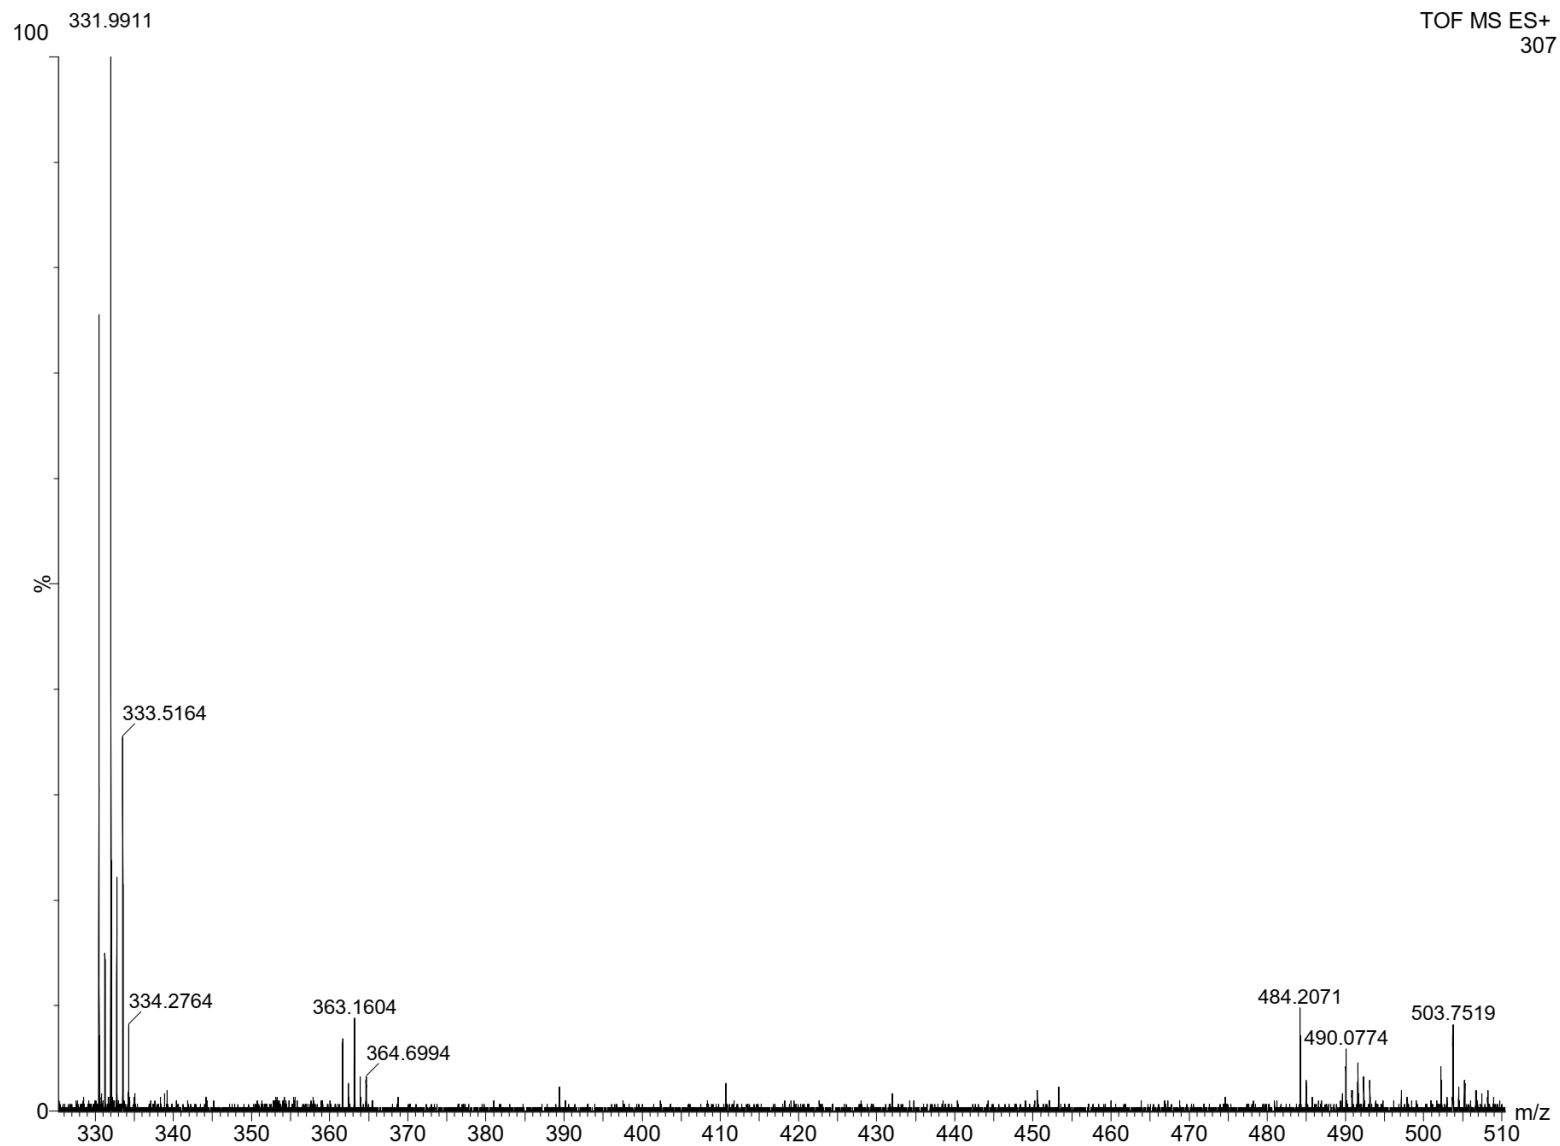

Figure S23. HRMS-ESI 4-bromo-2-isocyanophenyl 4-methoxybenzoate (1g).

## Supporting Information

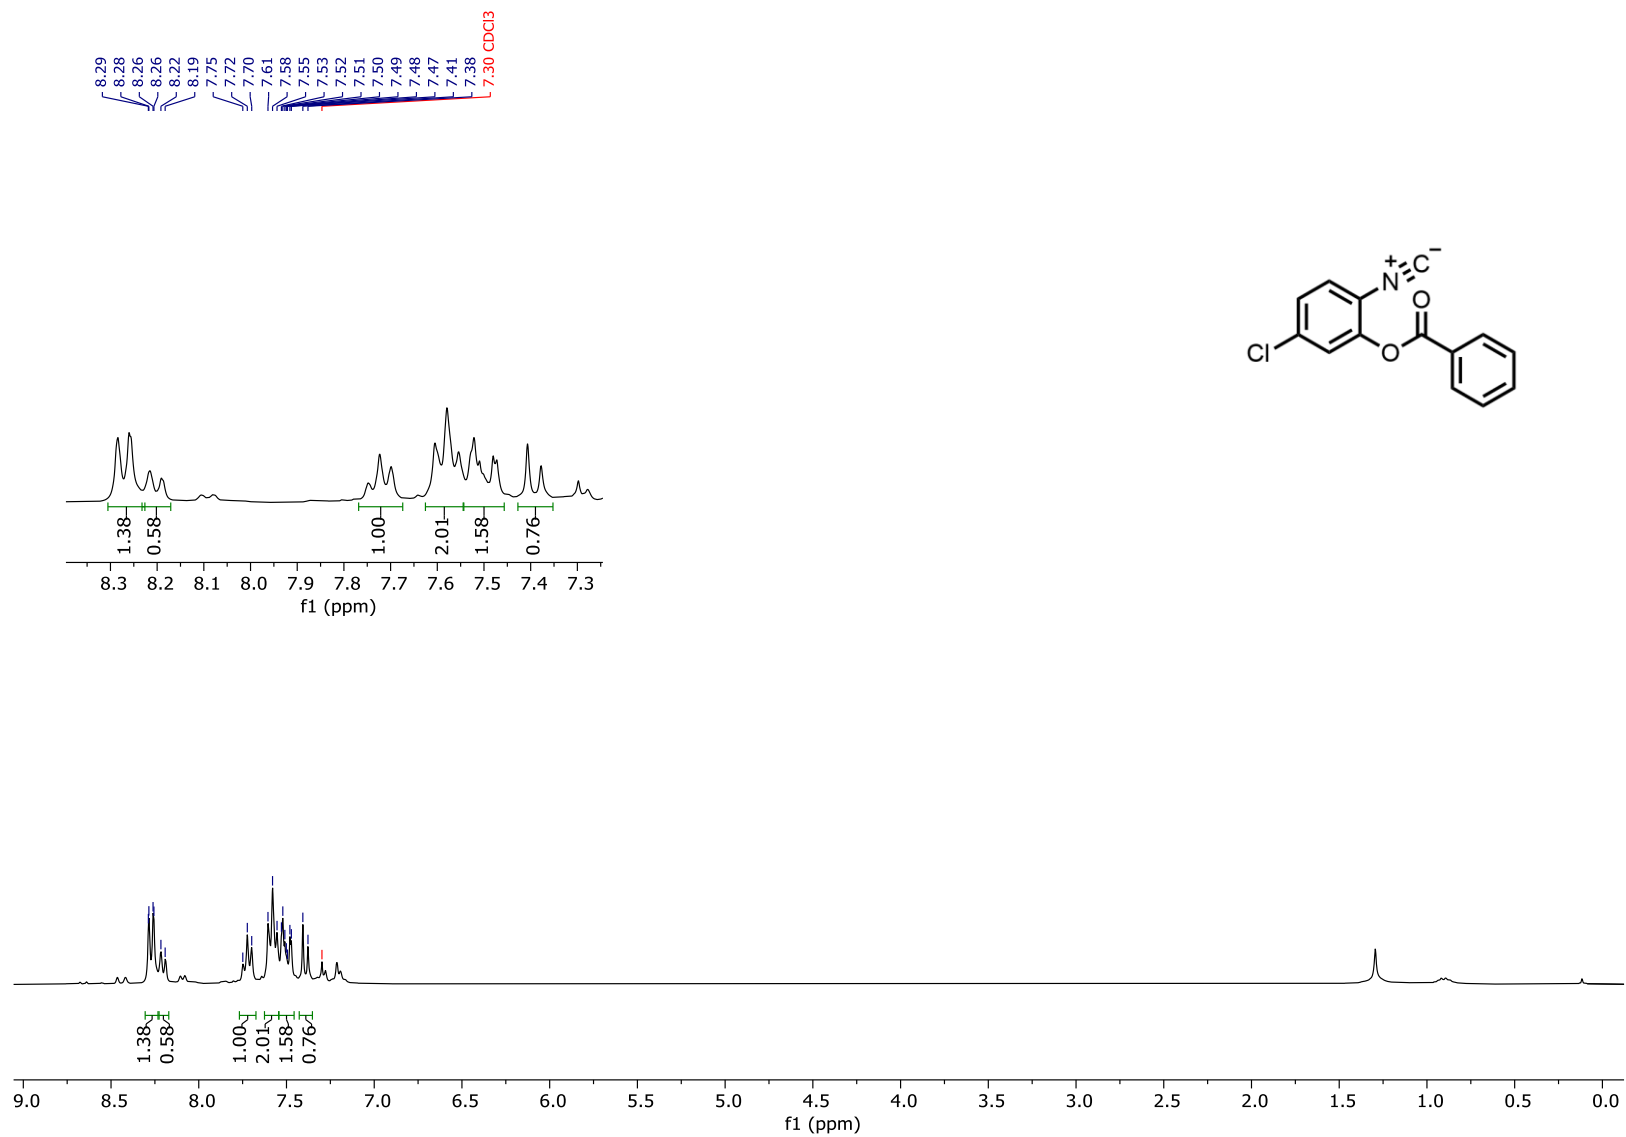

Figure S24. <sup>1</sup>H NMR (300 MHz, CDCl<sub>3</sub>) 5-chloro-2-isocyanophenyl benzoate (1h).

# Supporting Information

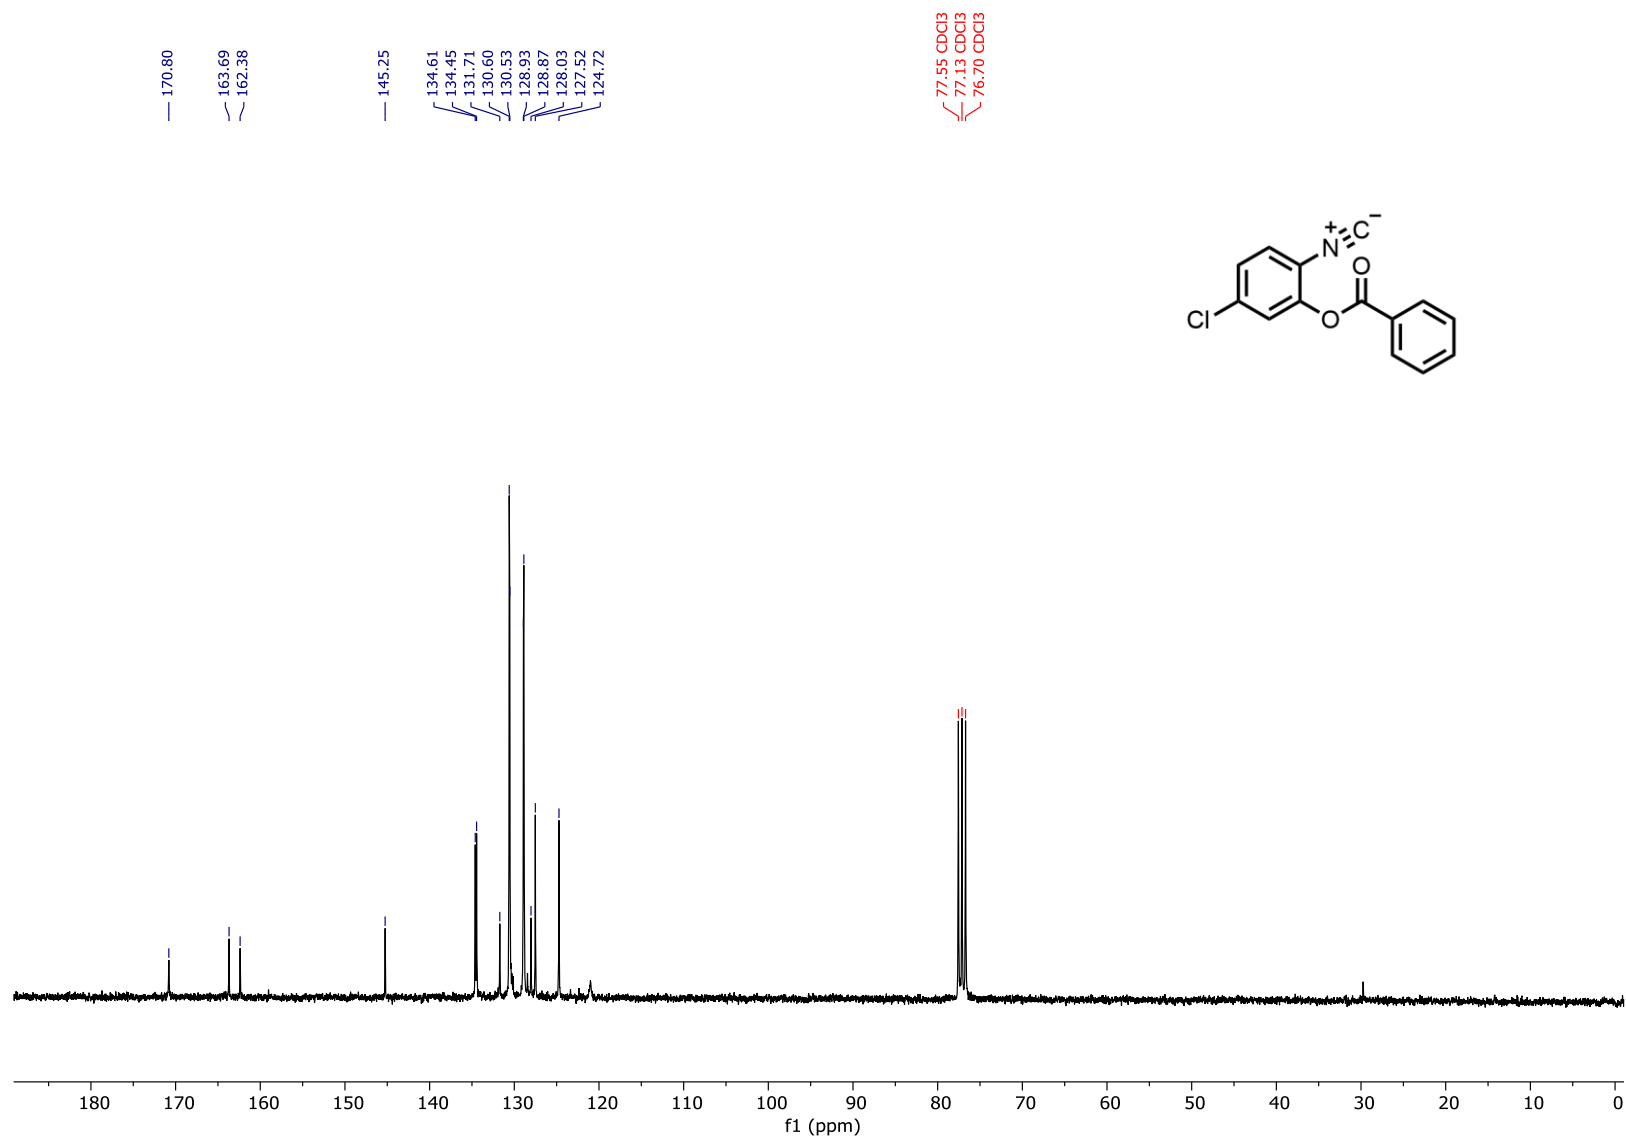

Figure S25. <sup>13</sup>C NMR (75 MHz, CDCl<sub>3</sub>) 5-chloro-2-isocyanophenyl benzoate (1h).

# Supporting Information

TOF MS ES+  
4.15e3

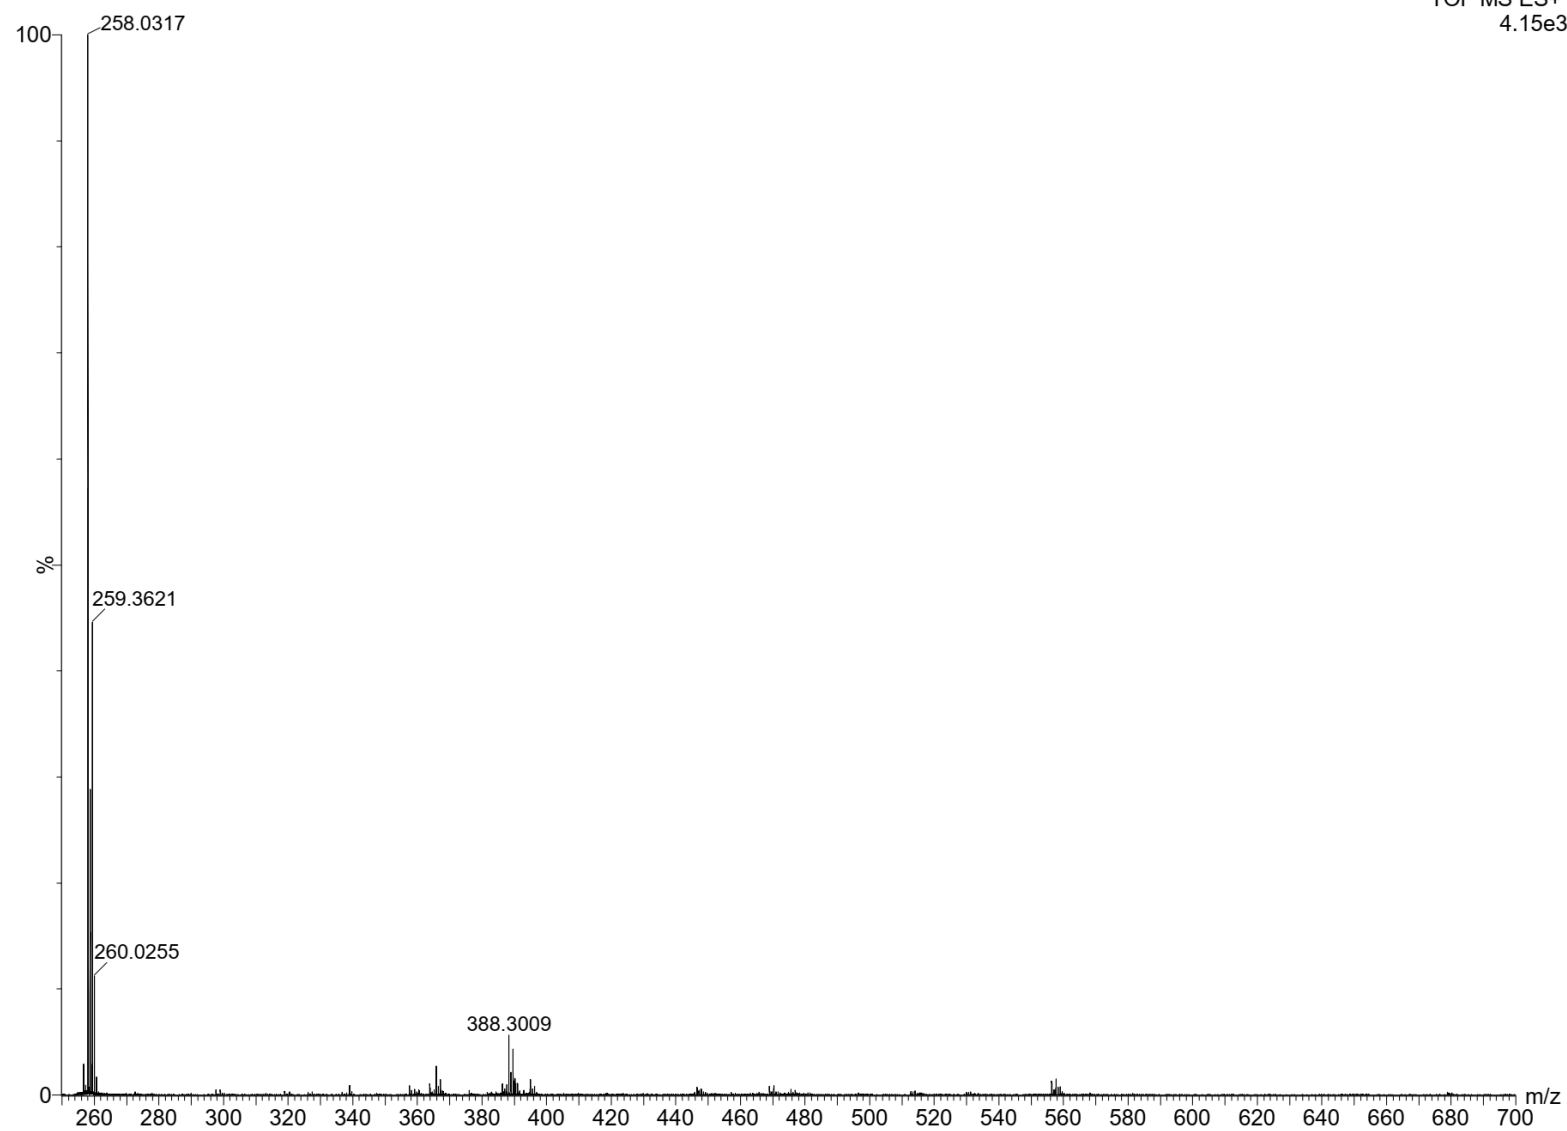

Figure S26. HRMS-ESI 5-chloro-2-isocyanophenyl benzoate (1h).

# Supporting Information

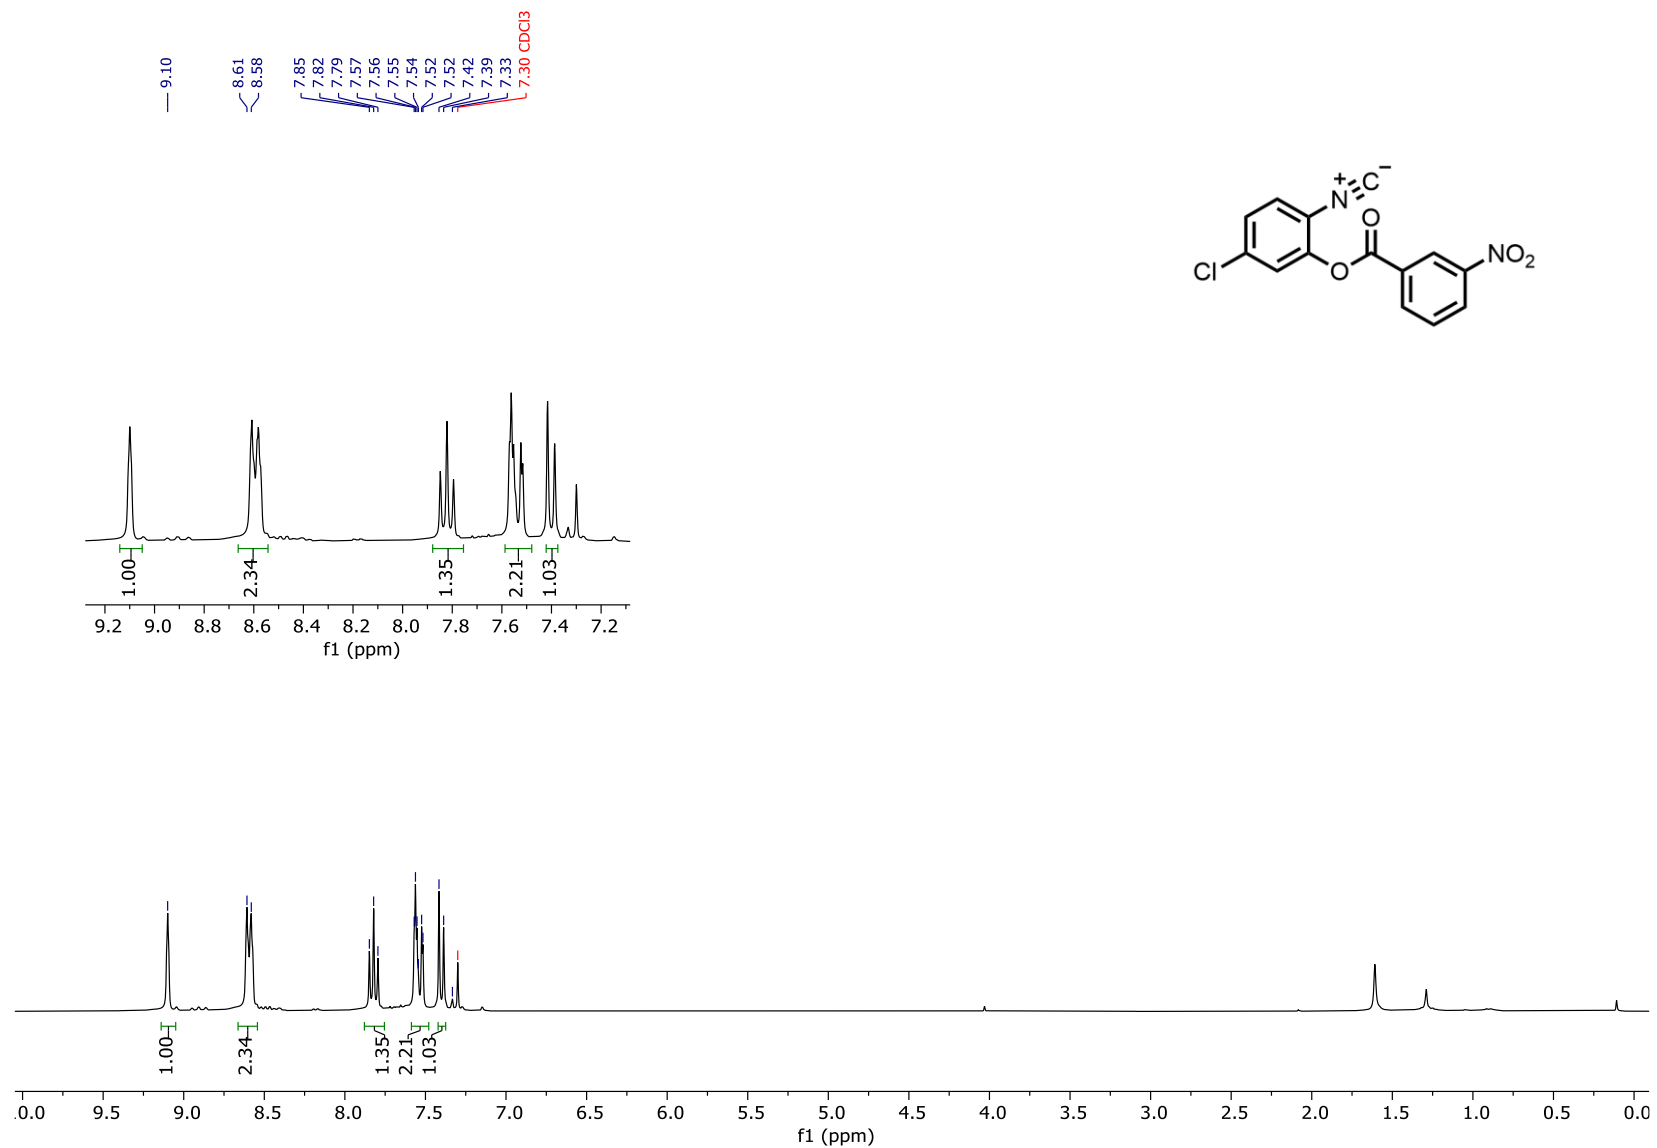

Figure S27. <sup>1</sup>H NMR (300 MHz, CDCl<sub>3</sub>) 5-chloro-2-isocyanophenyl 3-nitrobenzoate (1).

# Supporting Information

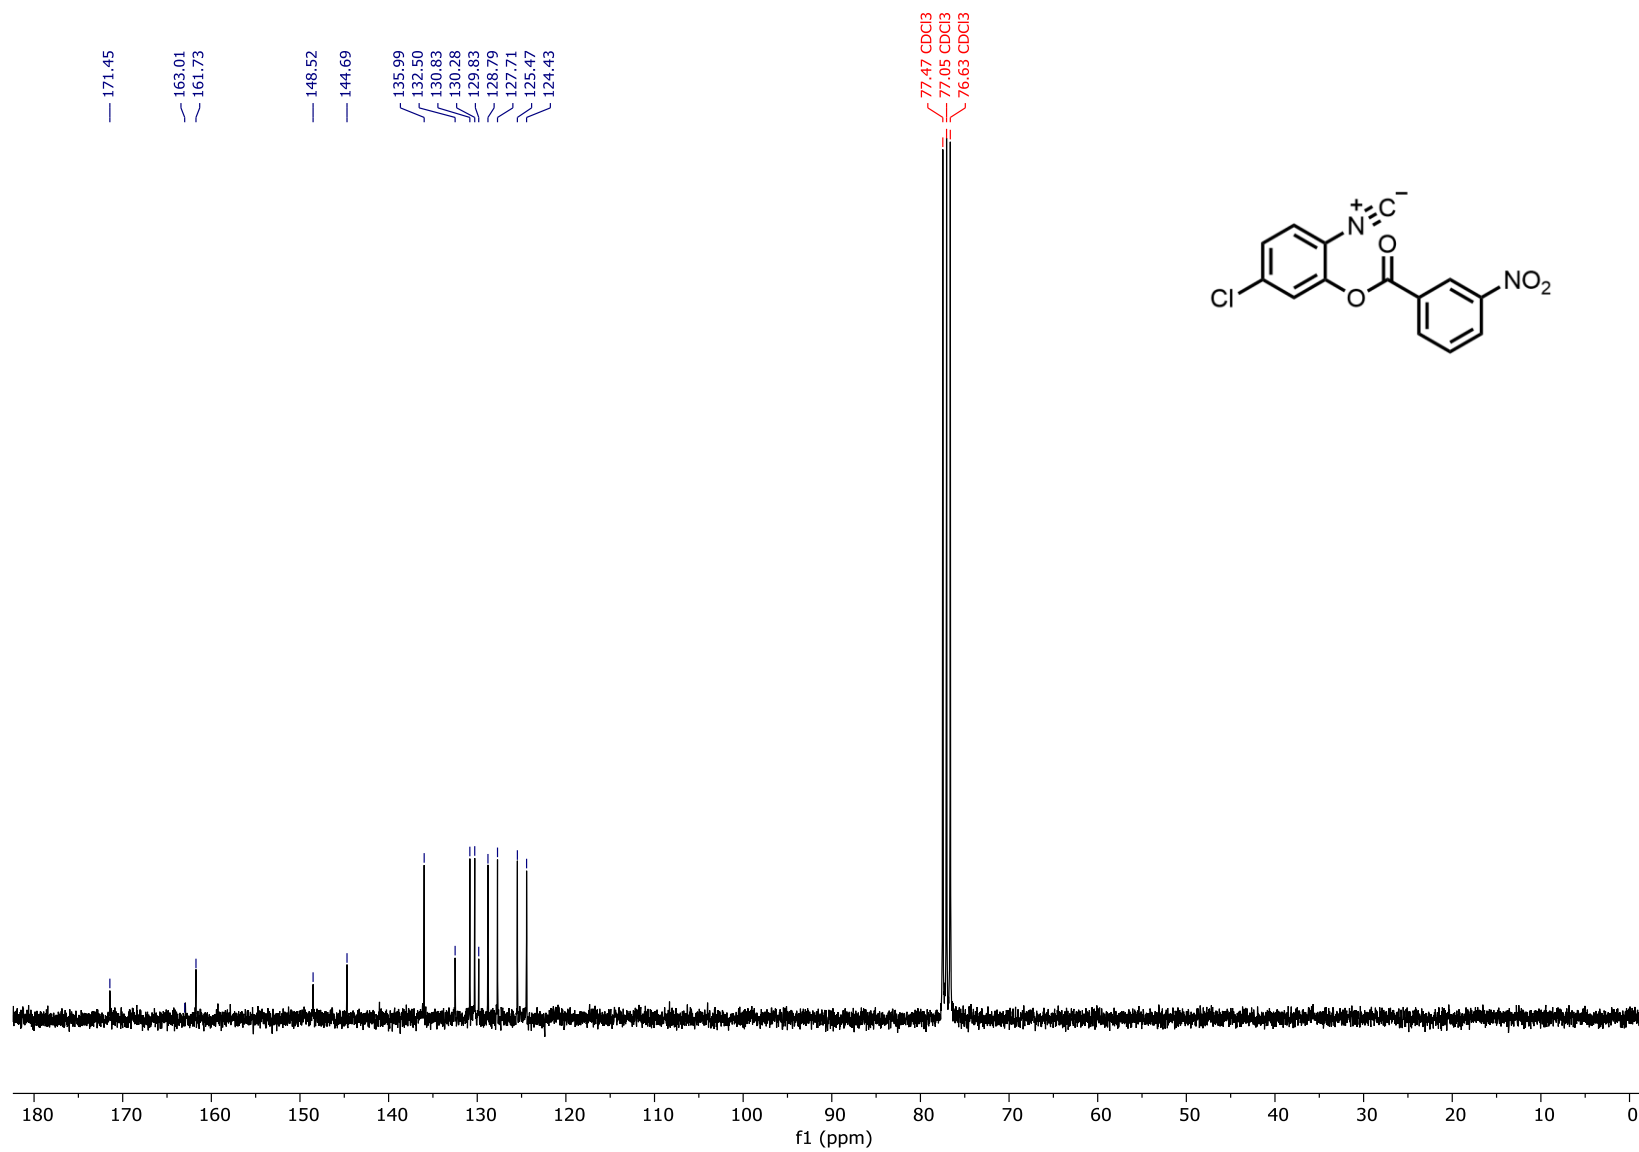

Figure S28.  $^{13}\text{C}$  NMR (75 MHz,  $\text{CDCl}_3$ ) 5-chloro-2-isocyanophenyl 3-nitrobenzoate (1i).



## Supporting Information

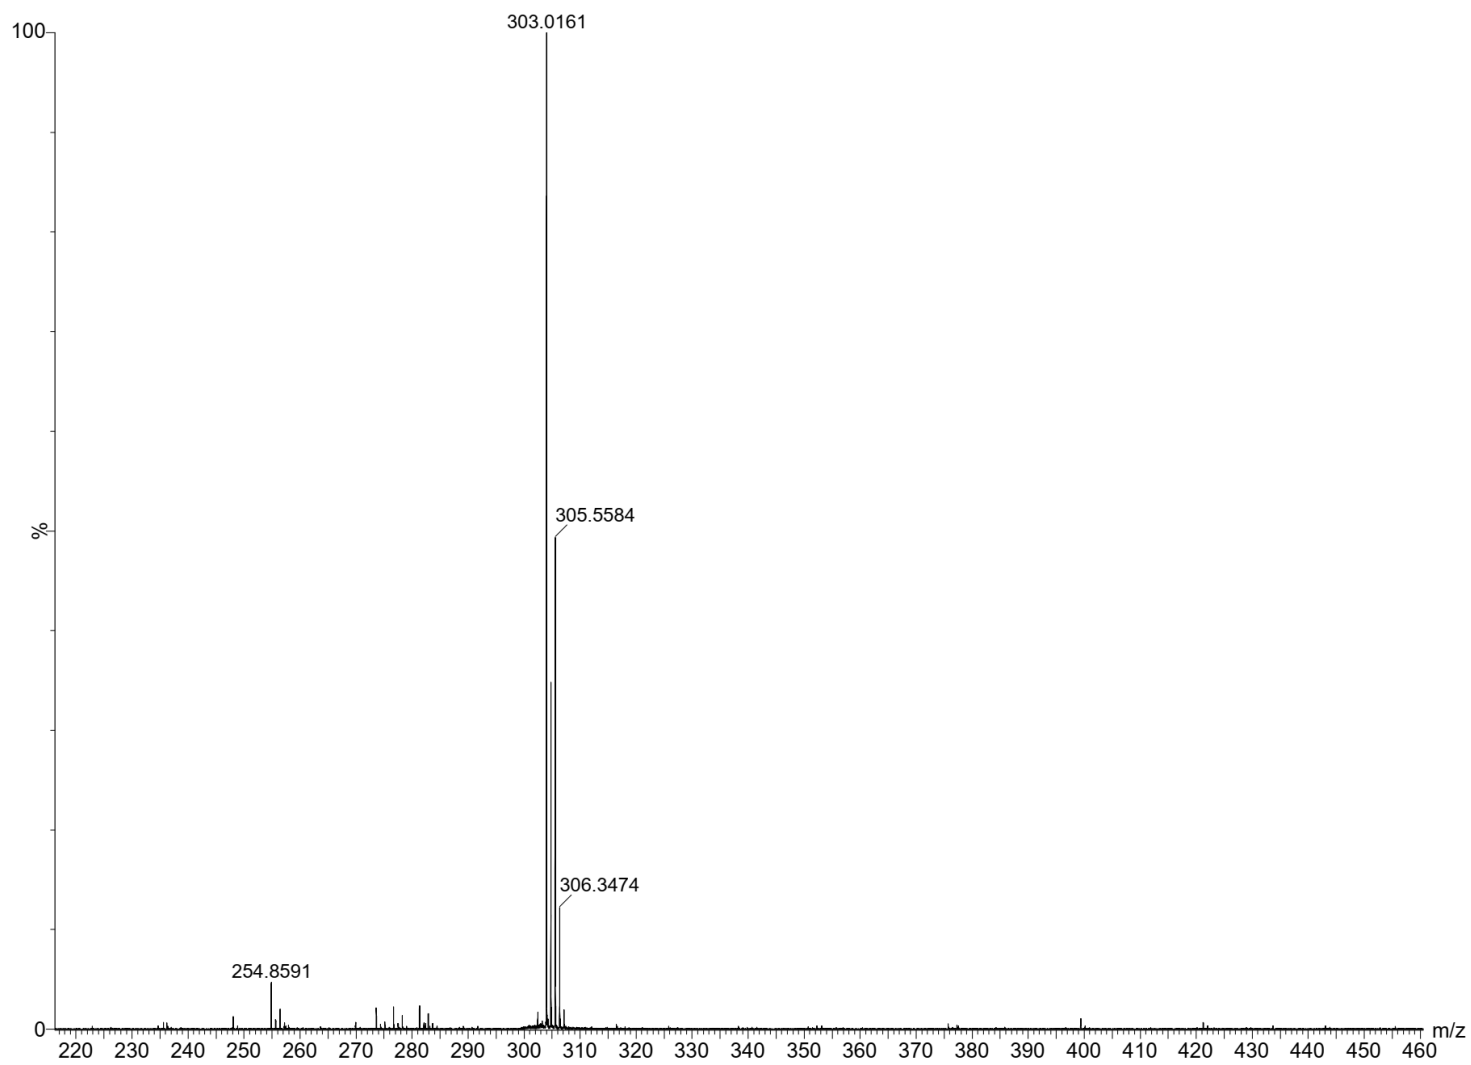

Figure S29. HRMS-ESI 5-chloro-2-isocyanophenyl 3-nitrobenzoate (1i).

# Supporting Information

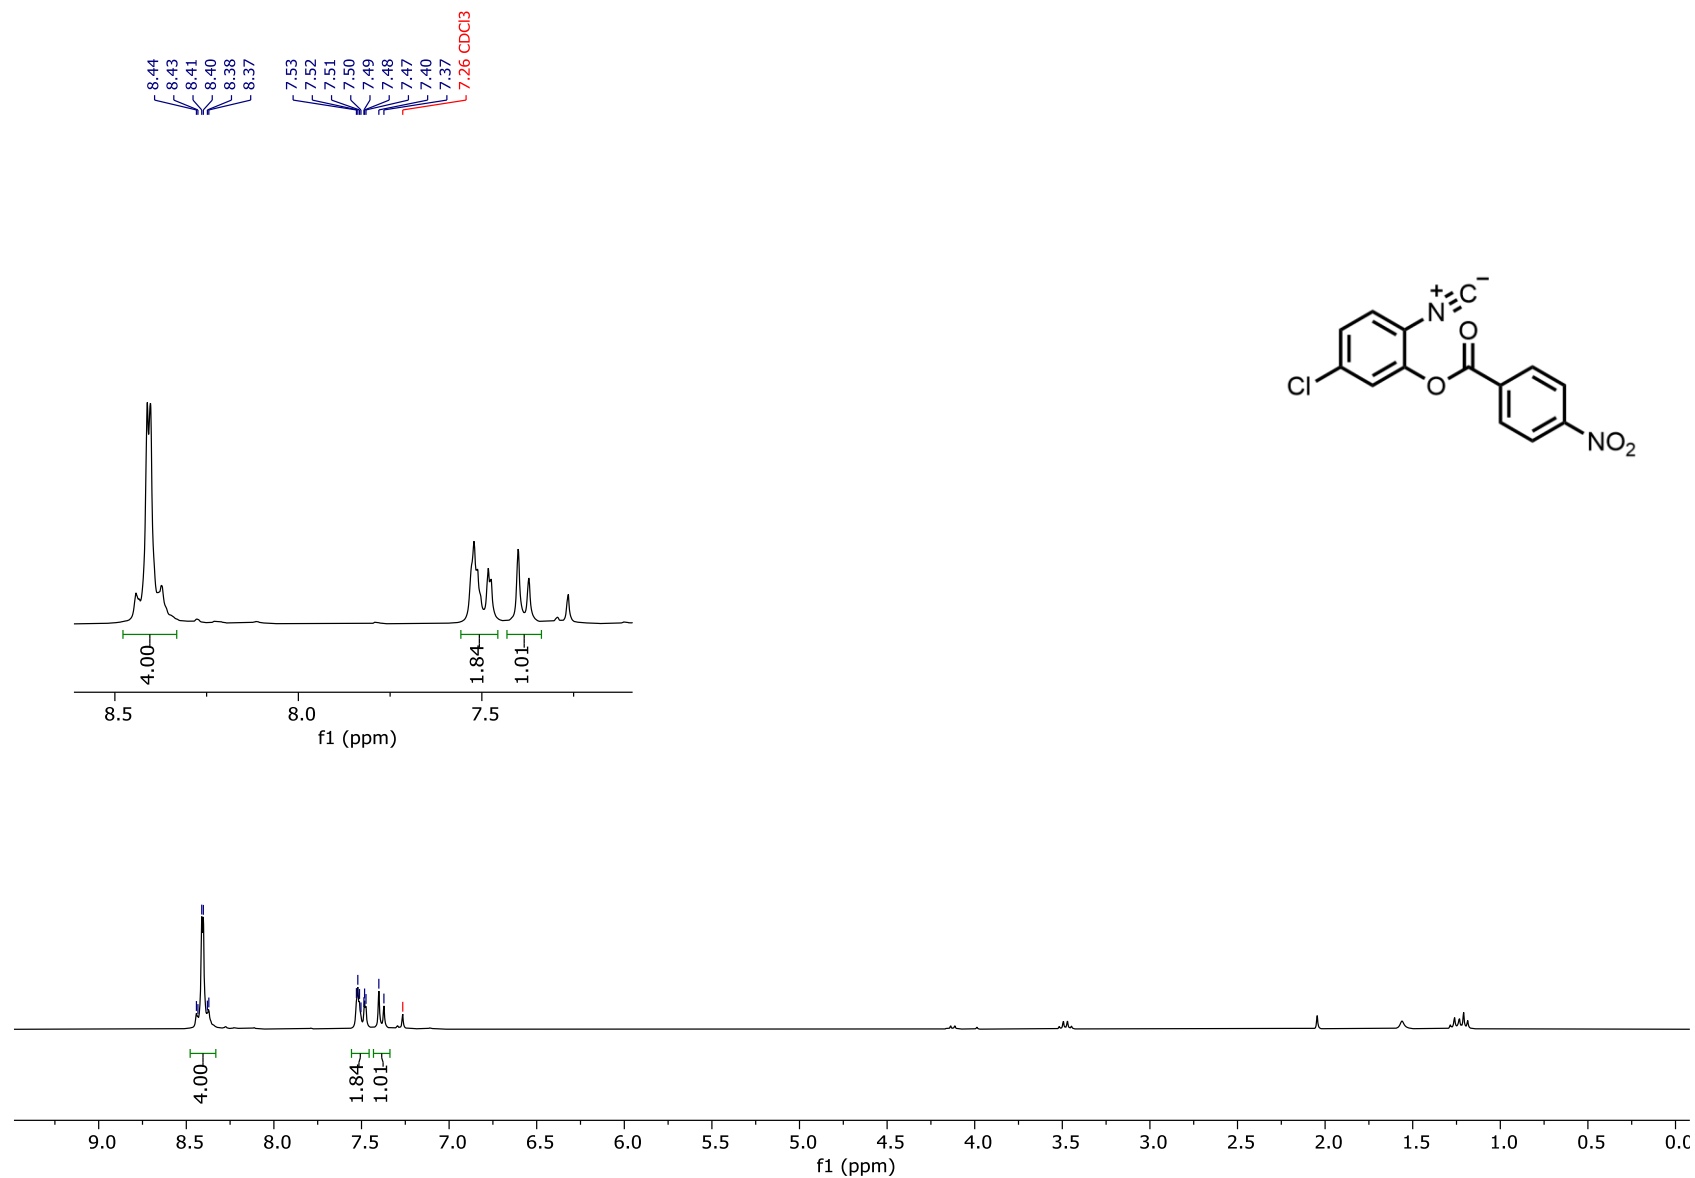

Figure S30. <sup>1</sup>H NMR (300 MHz, CDCl<sub>3</sub>) 5-chloro-2-isocyanophenyl 4-nitrobenzoate (1j).

# Supporting Information

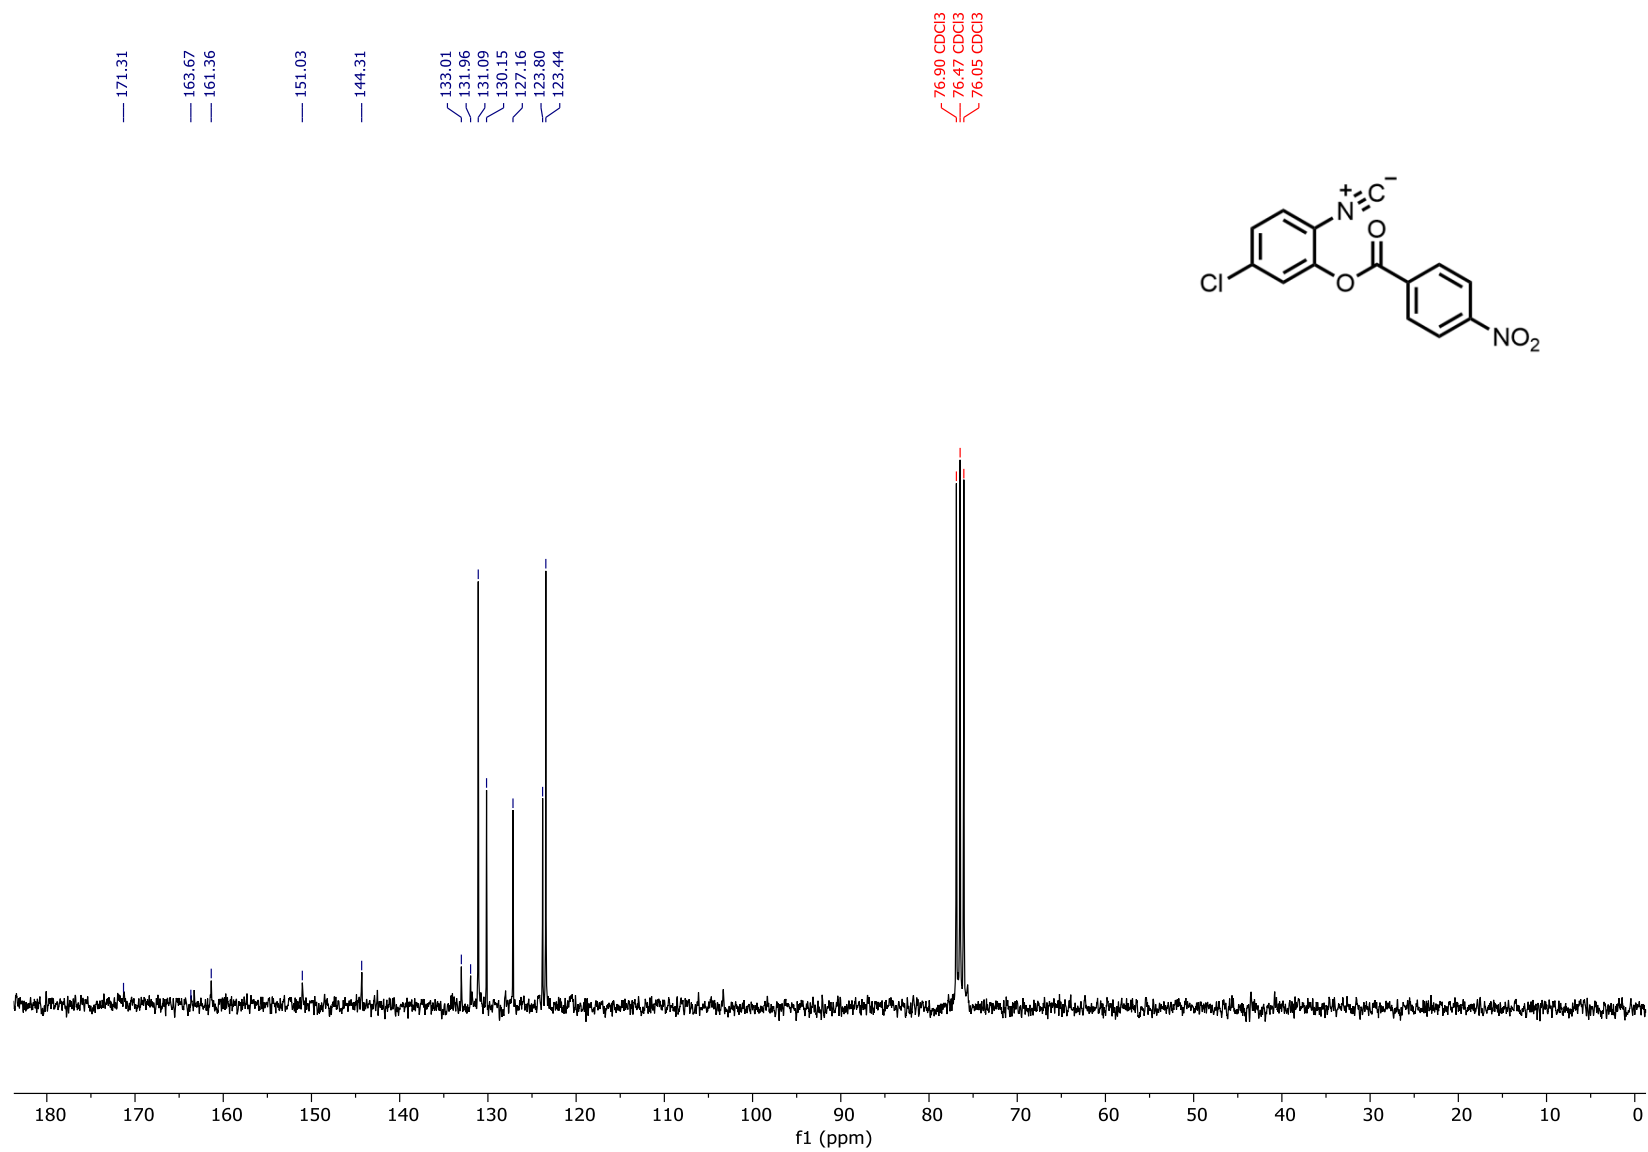

Figure S31.  $^{13}\text{C}$  NMR (75 MHz,  $\text{CDCl}_3$ ) 5-chloro-2-isocyanophenyl 4-nitrobenzoate (1j).

## Supporting Information

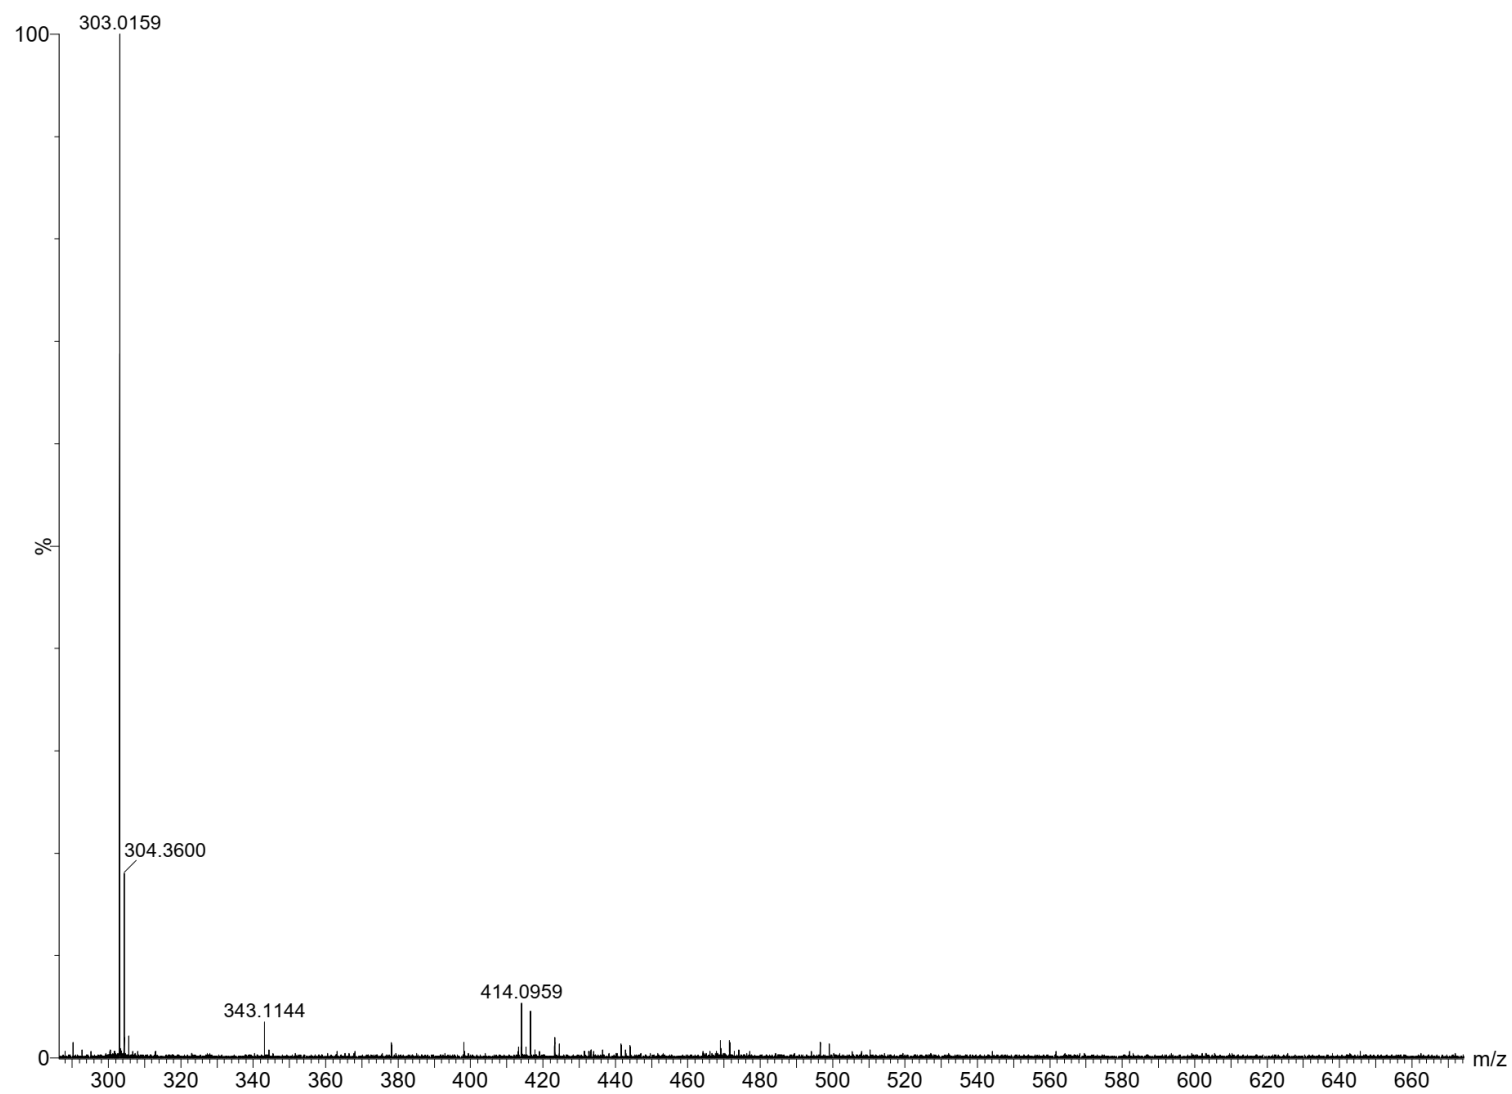

Figure S32. HRMS-ESI 5-chloro-2-isocyanophenyl 4-nitrobenzoate (1j).

# Supporting Information

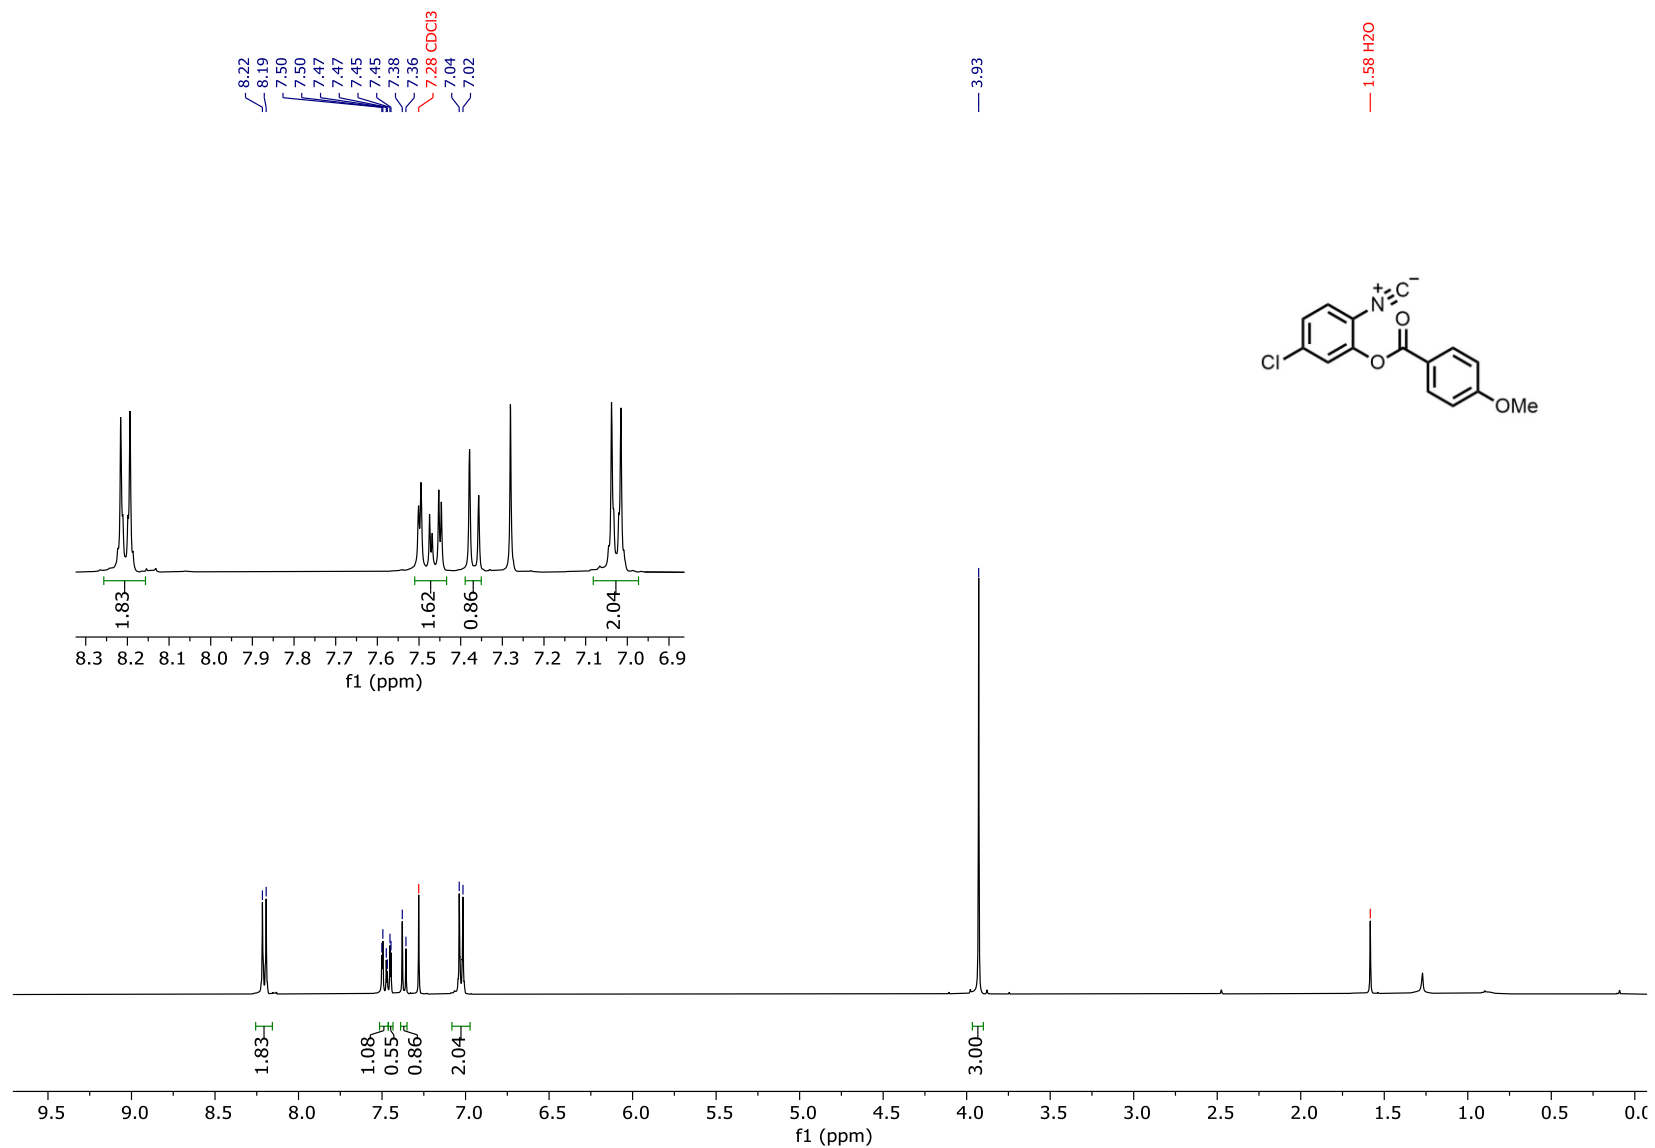

Figure S33. <sup>1</sup>H NMR (400 MHz, CDCl<sub>3</sub>) 5-chloro-2-isocyanophenyl 4-methoxybenzoate (1k).

## Supporting Information

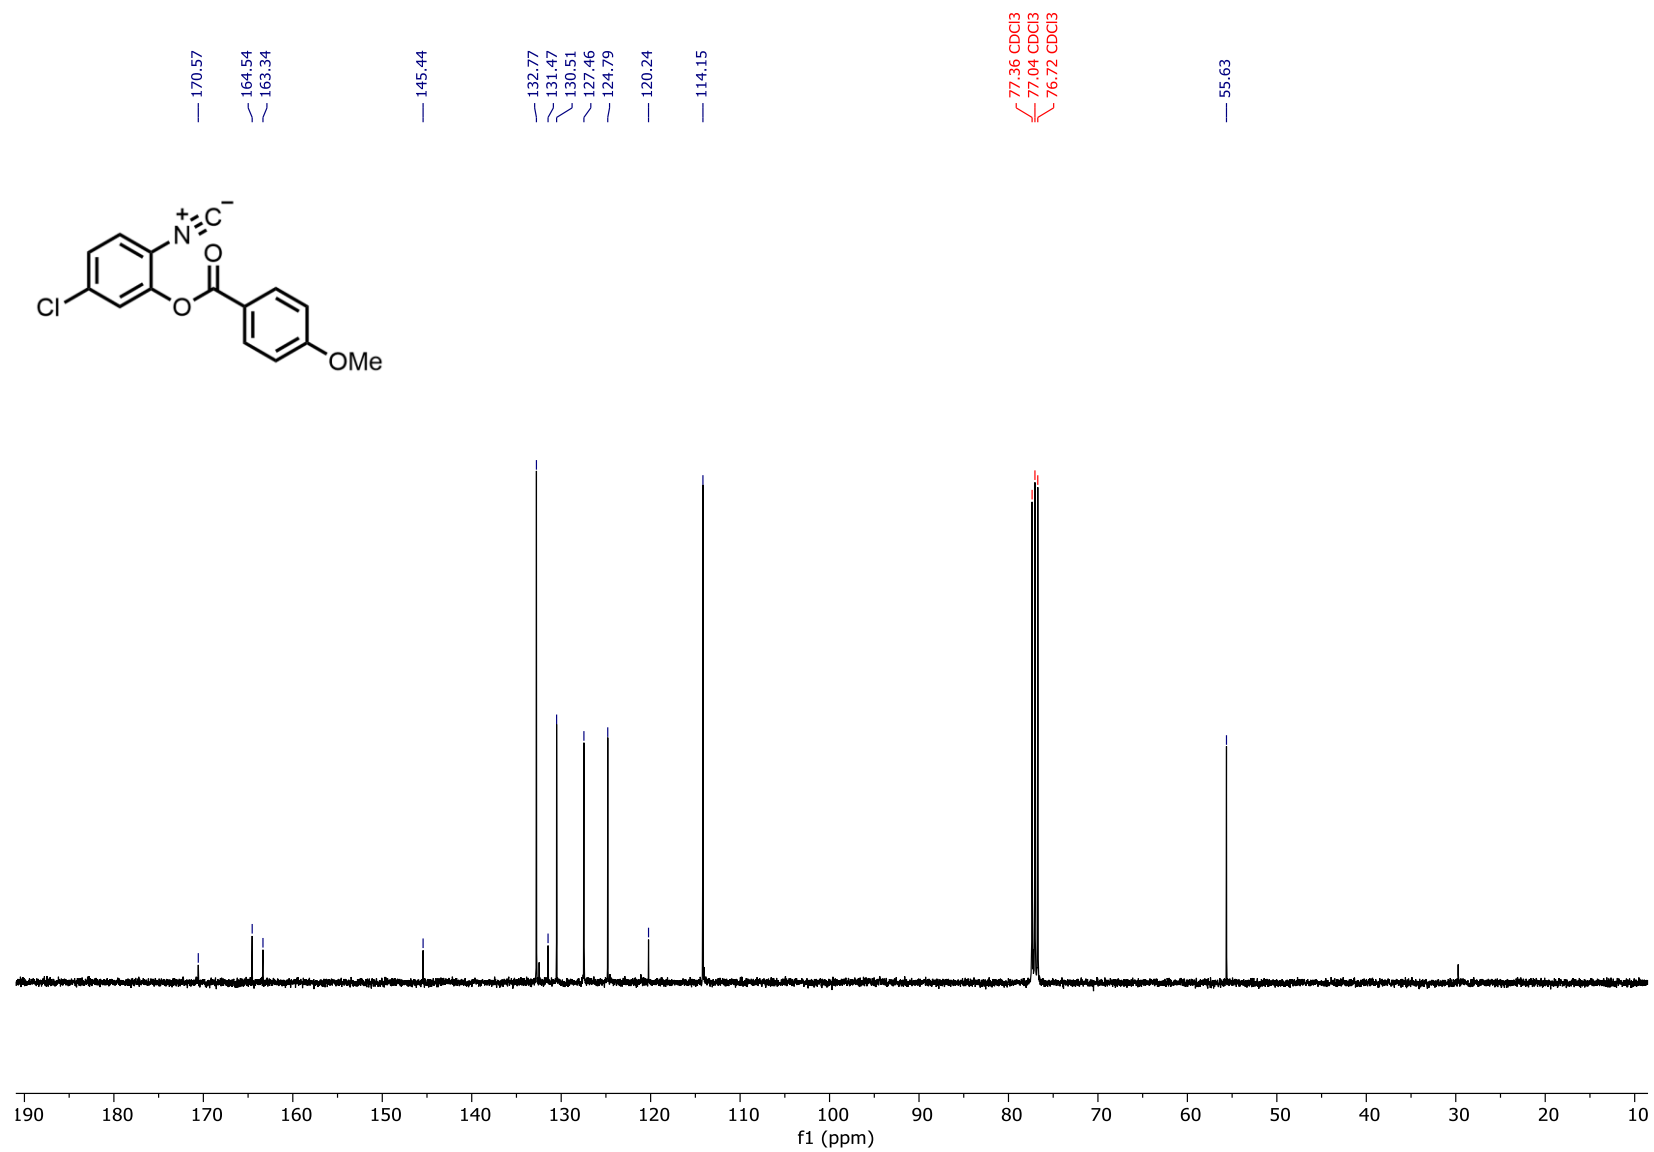

Figure S34.  $^{13}\text{C}$  NMR (100 MHz,  $\text{CDCl}_3$ ) 5-chloro-2-isocyanophenyl 4-methoxybenzoate (1k).

## Supporting Information

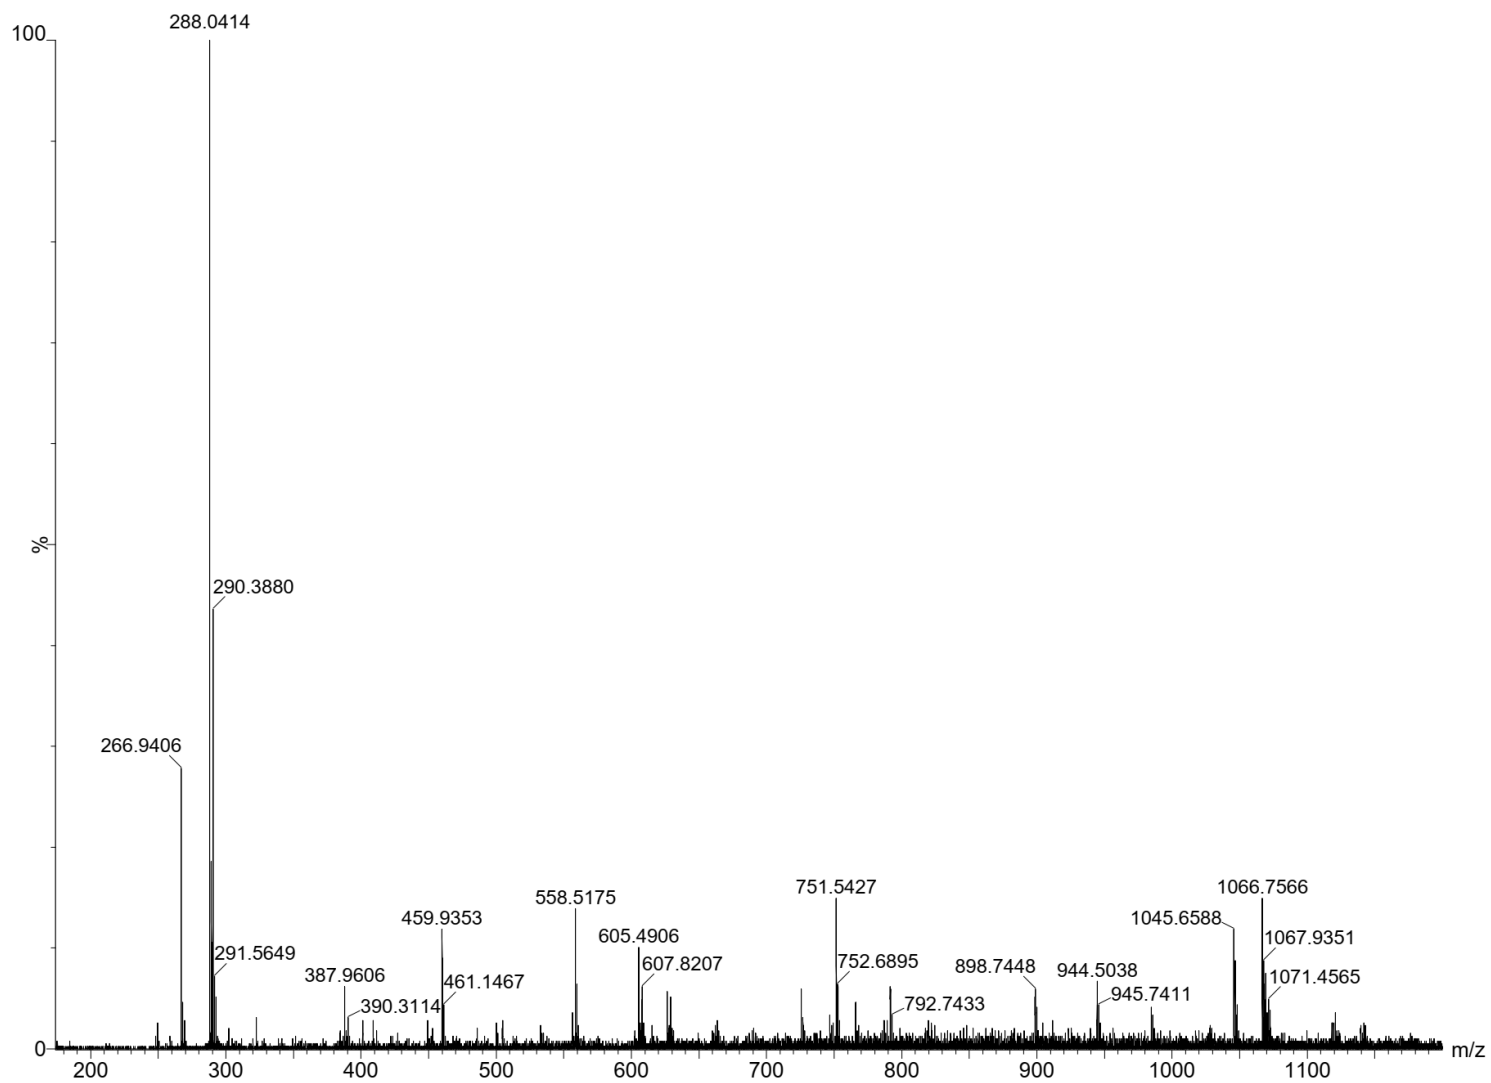

Figure S35. HRMS-ESI 5-chloro-2-isocyanophenyl 4-methoxybenzoate (1k).

# Supporting Information

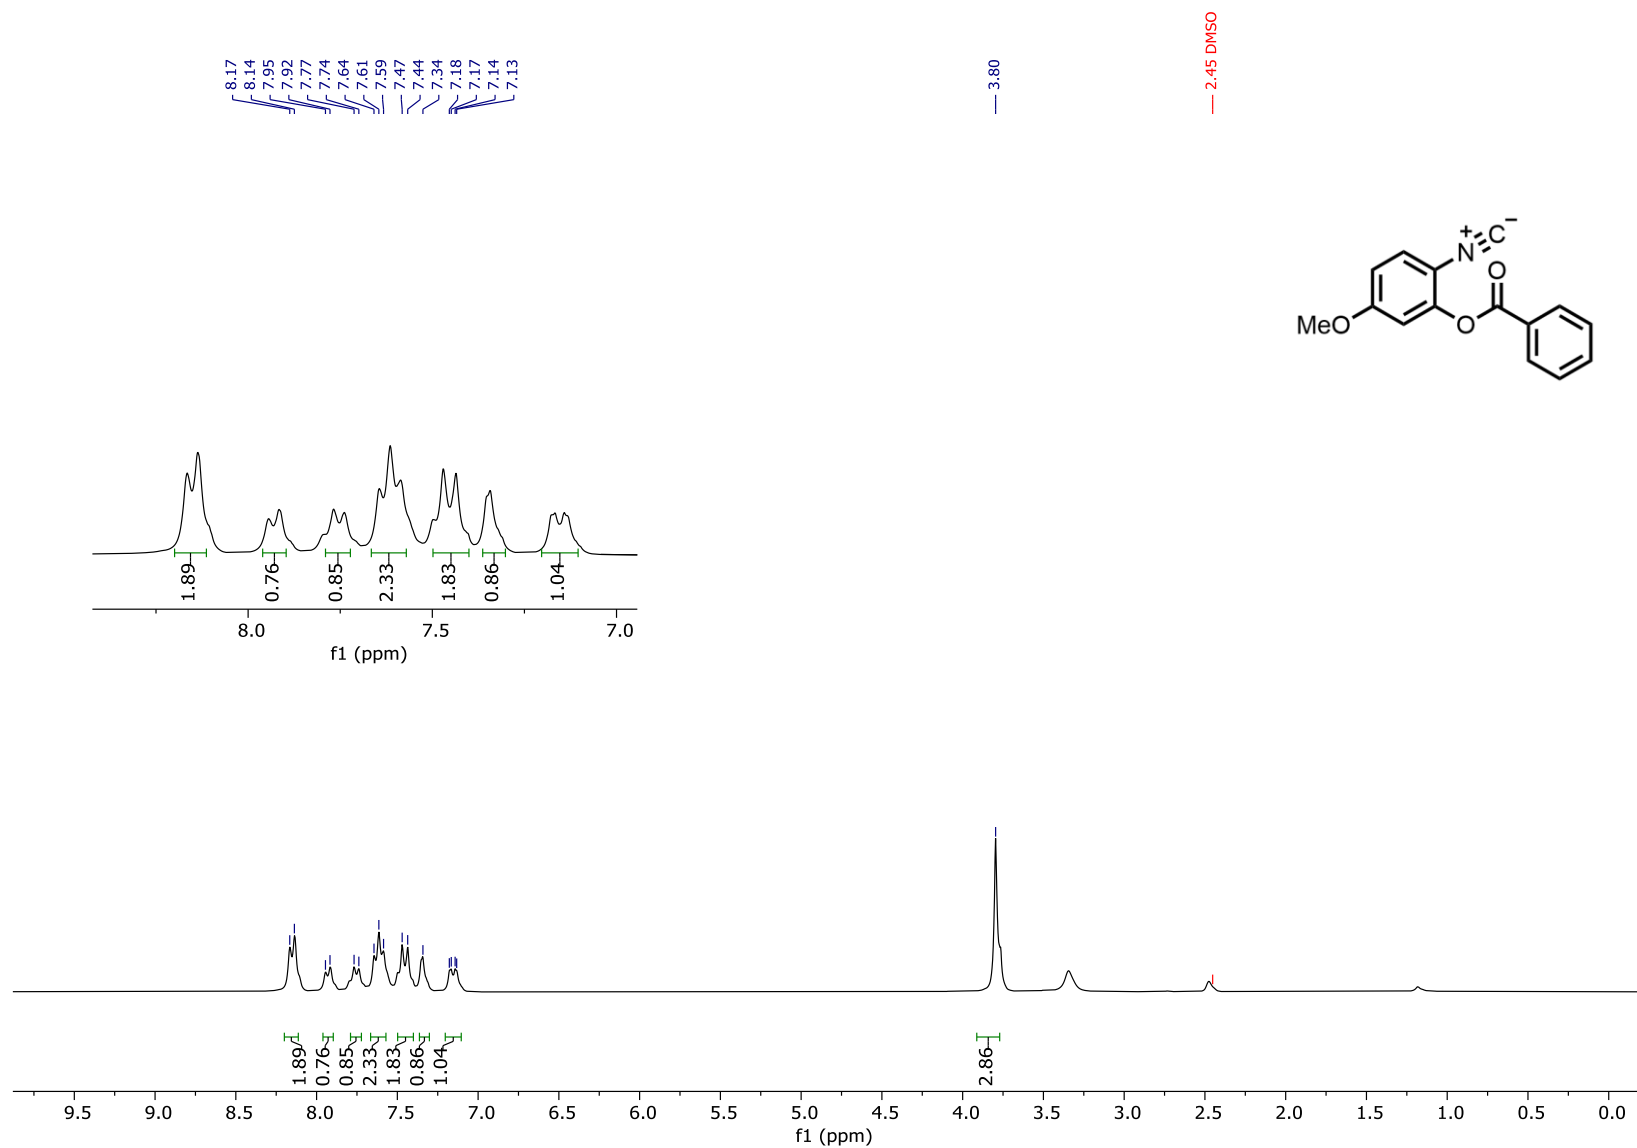

Figure S36. <sup>1</sup>H NMR (250 MHz, DMSO) 2-isocyano-5-methoxyphenyl benzoate (1).



# Supporting Information

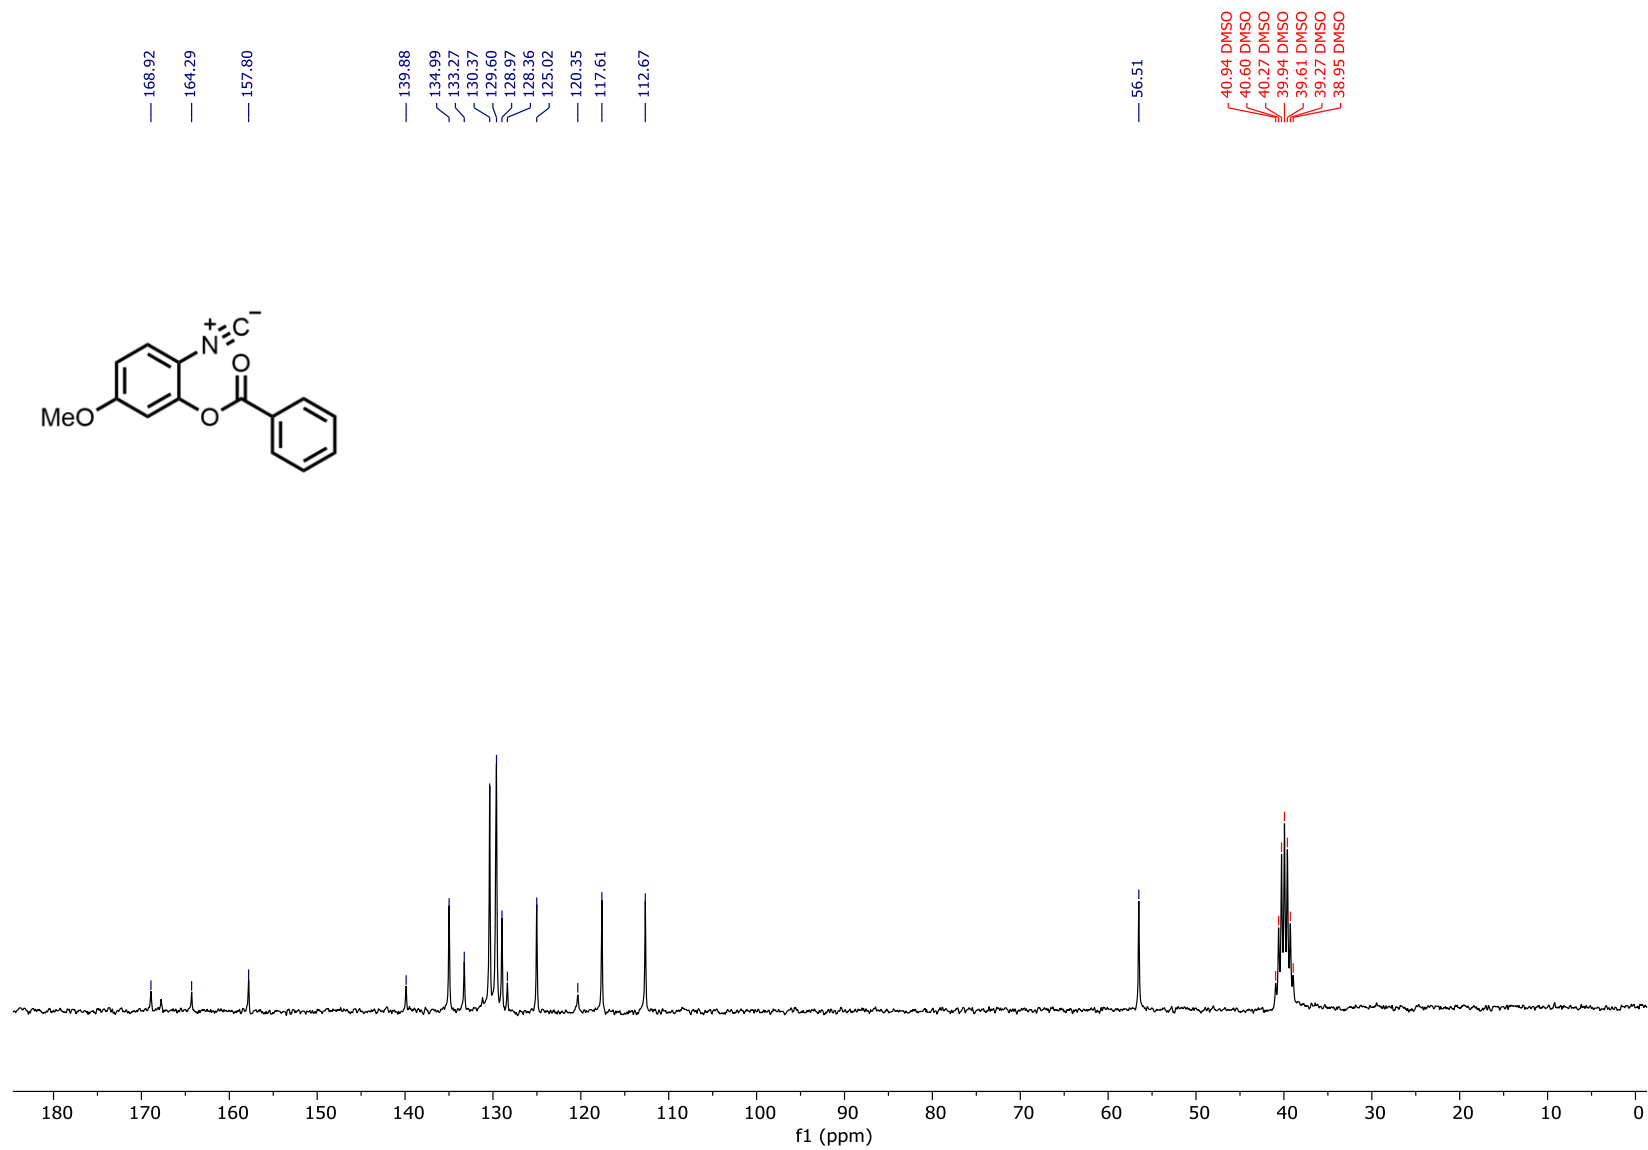

Figure S37.  $^{13}\text{C}$  NMR (63 MHz, DMSO) 2-isocyano-5-methoxyphenyl benzoate (1).

## Supporting Information

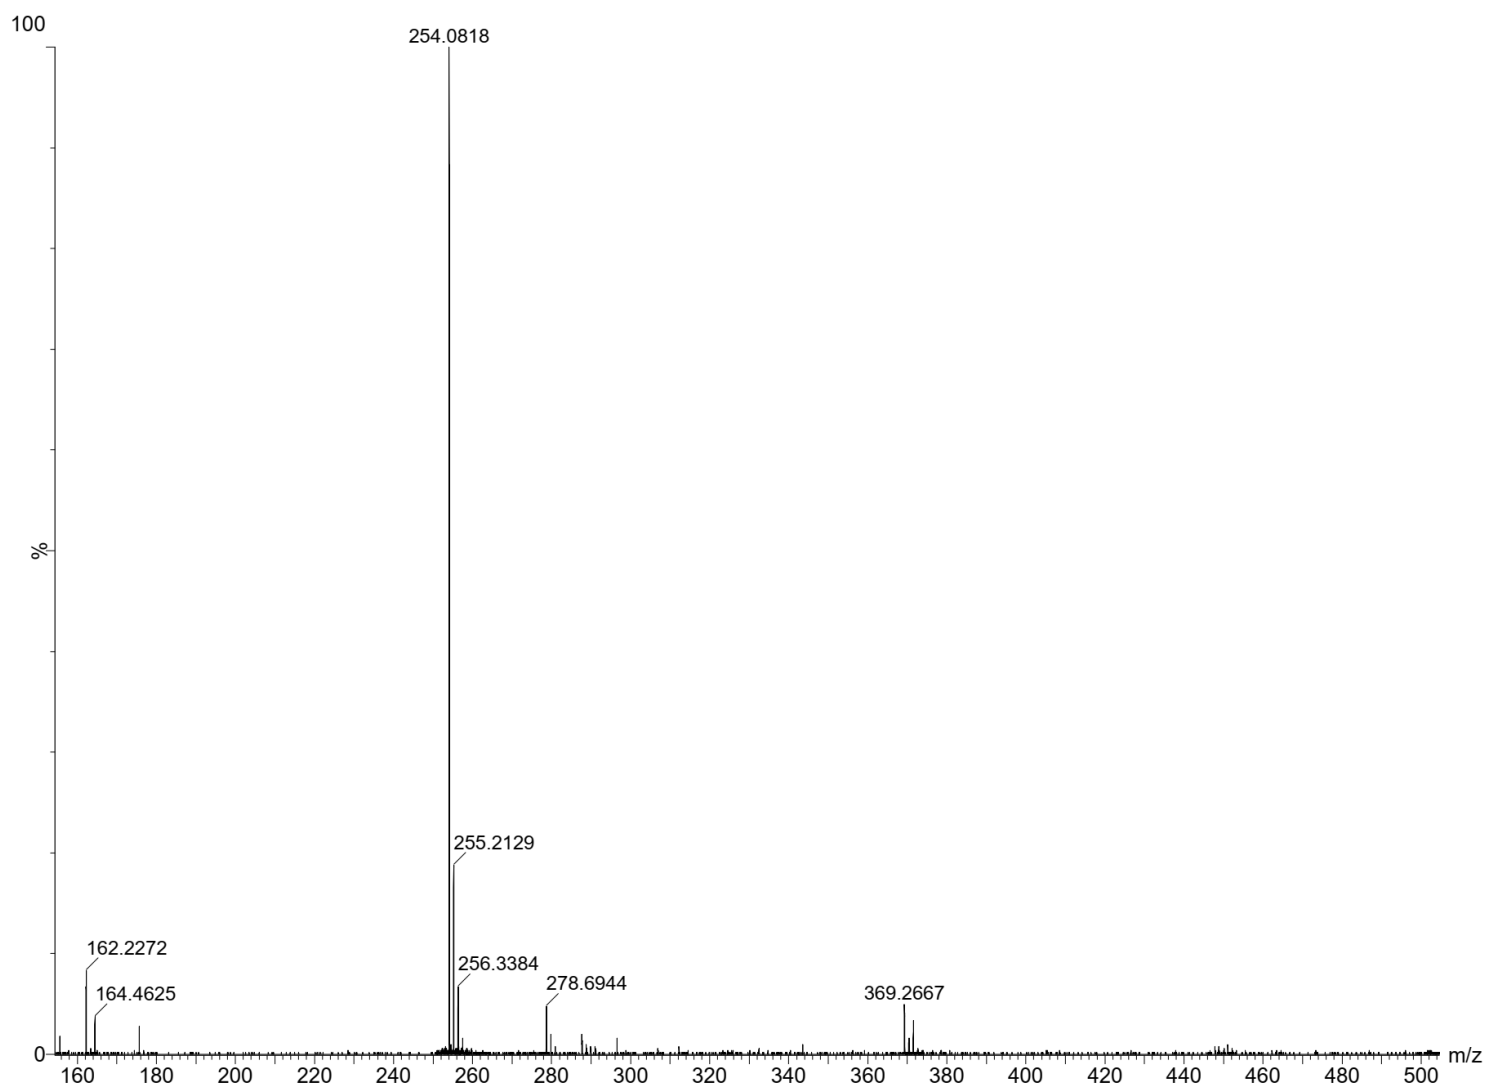

Figure S38. HRMS-ESI 2-isocyano-5-methoxyphenyl benzoate (1).

# Supporting Information

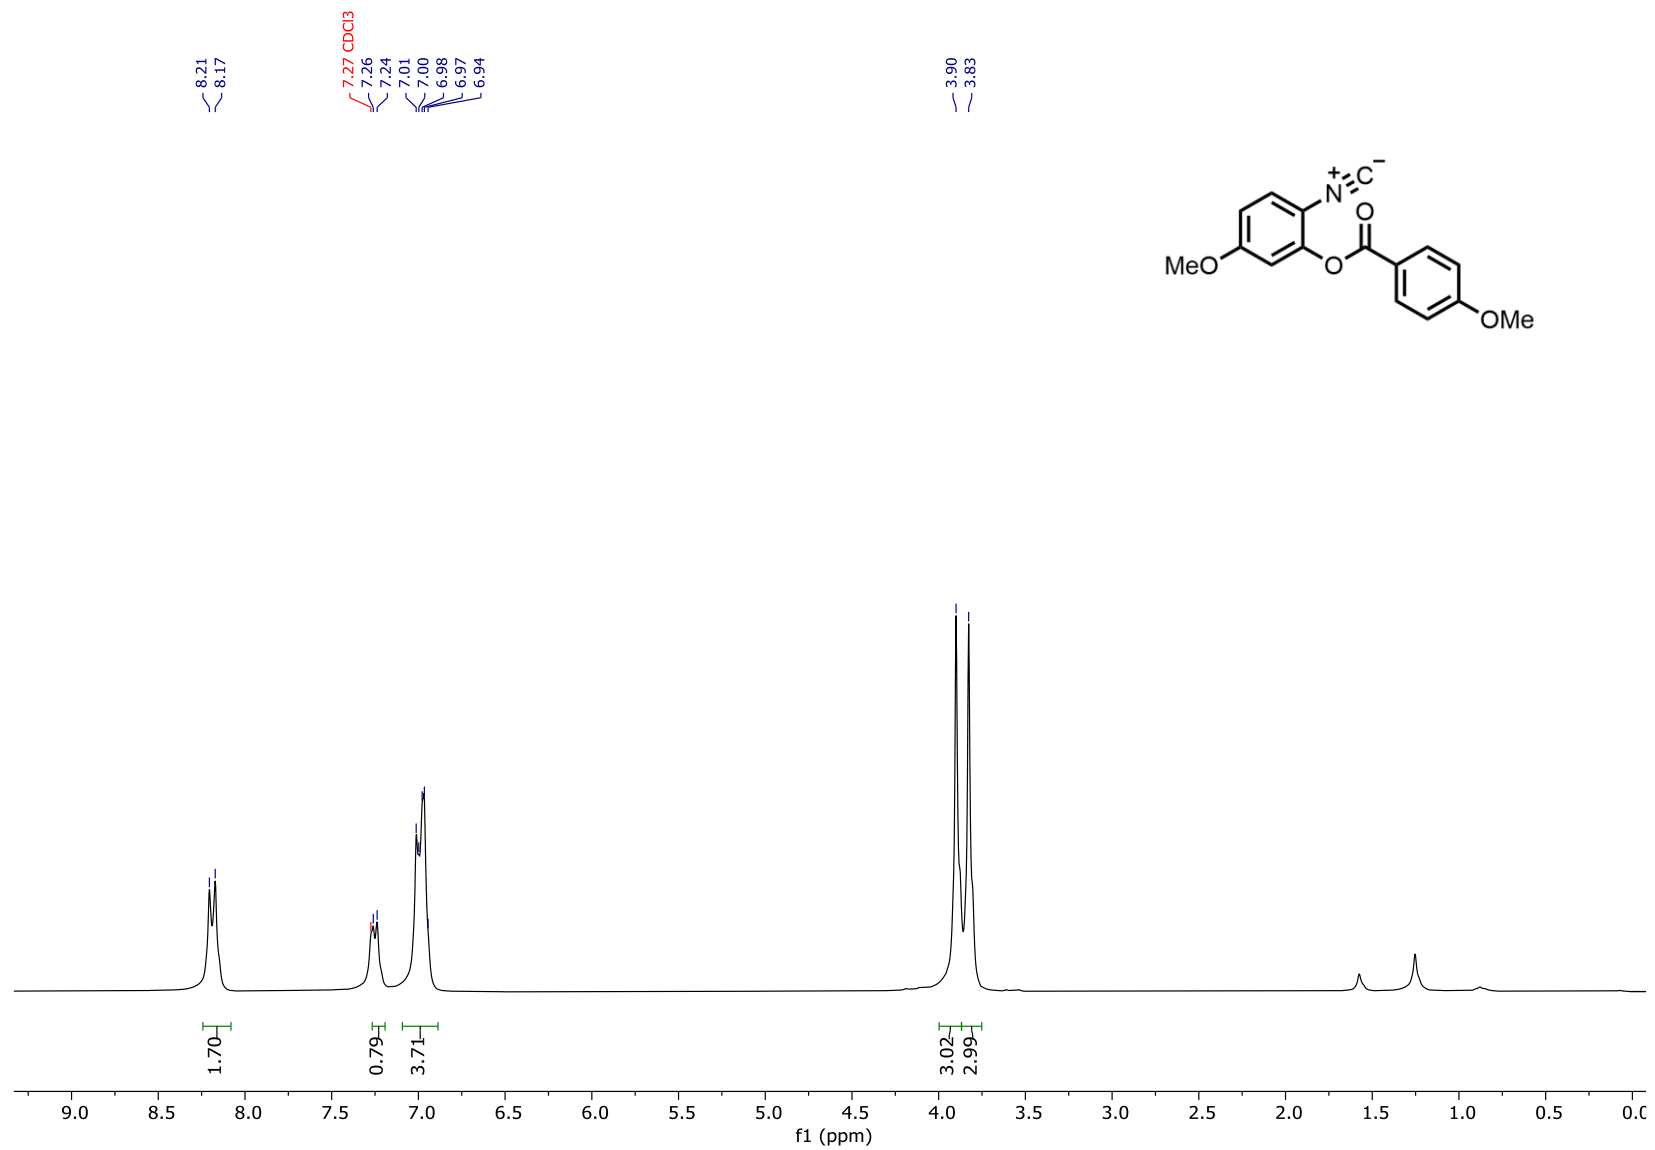

Figure S39. <sup>1</sup>H NMR (250 MHz, CDCl<sub>3</sub>) 2-isocyano-5-methoxyphenyl 4-methoxybenzoate (1m).

# Supporting Information

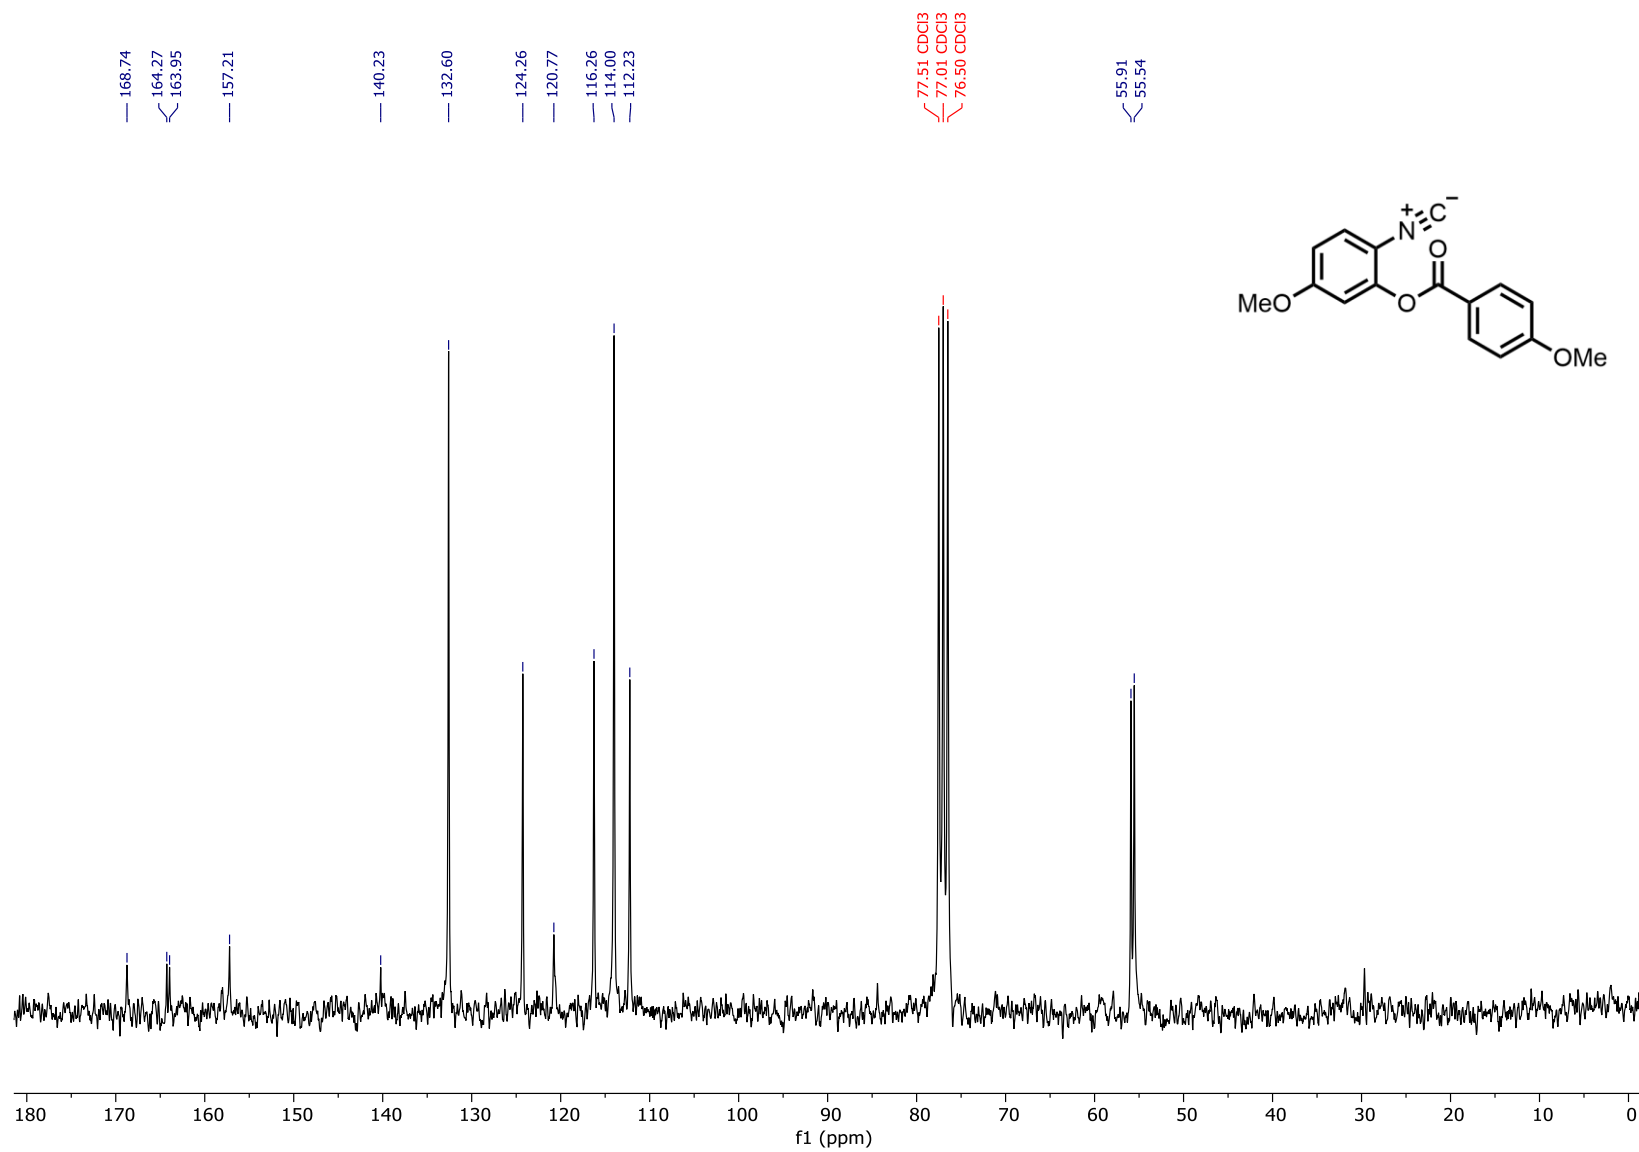

Figure S40. <sup>13</sup>C NMR (63 MHz, CDCl<sub>3</sub>) 2-isocyano-5-methoxyphenyl 4-methoxybenzoate (1m).

# Supporting Information

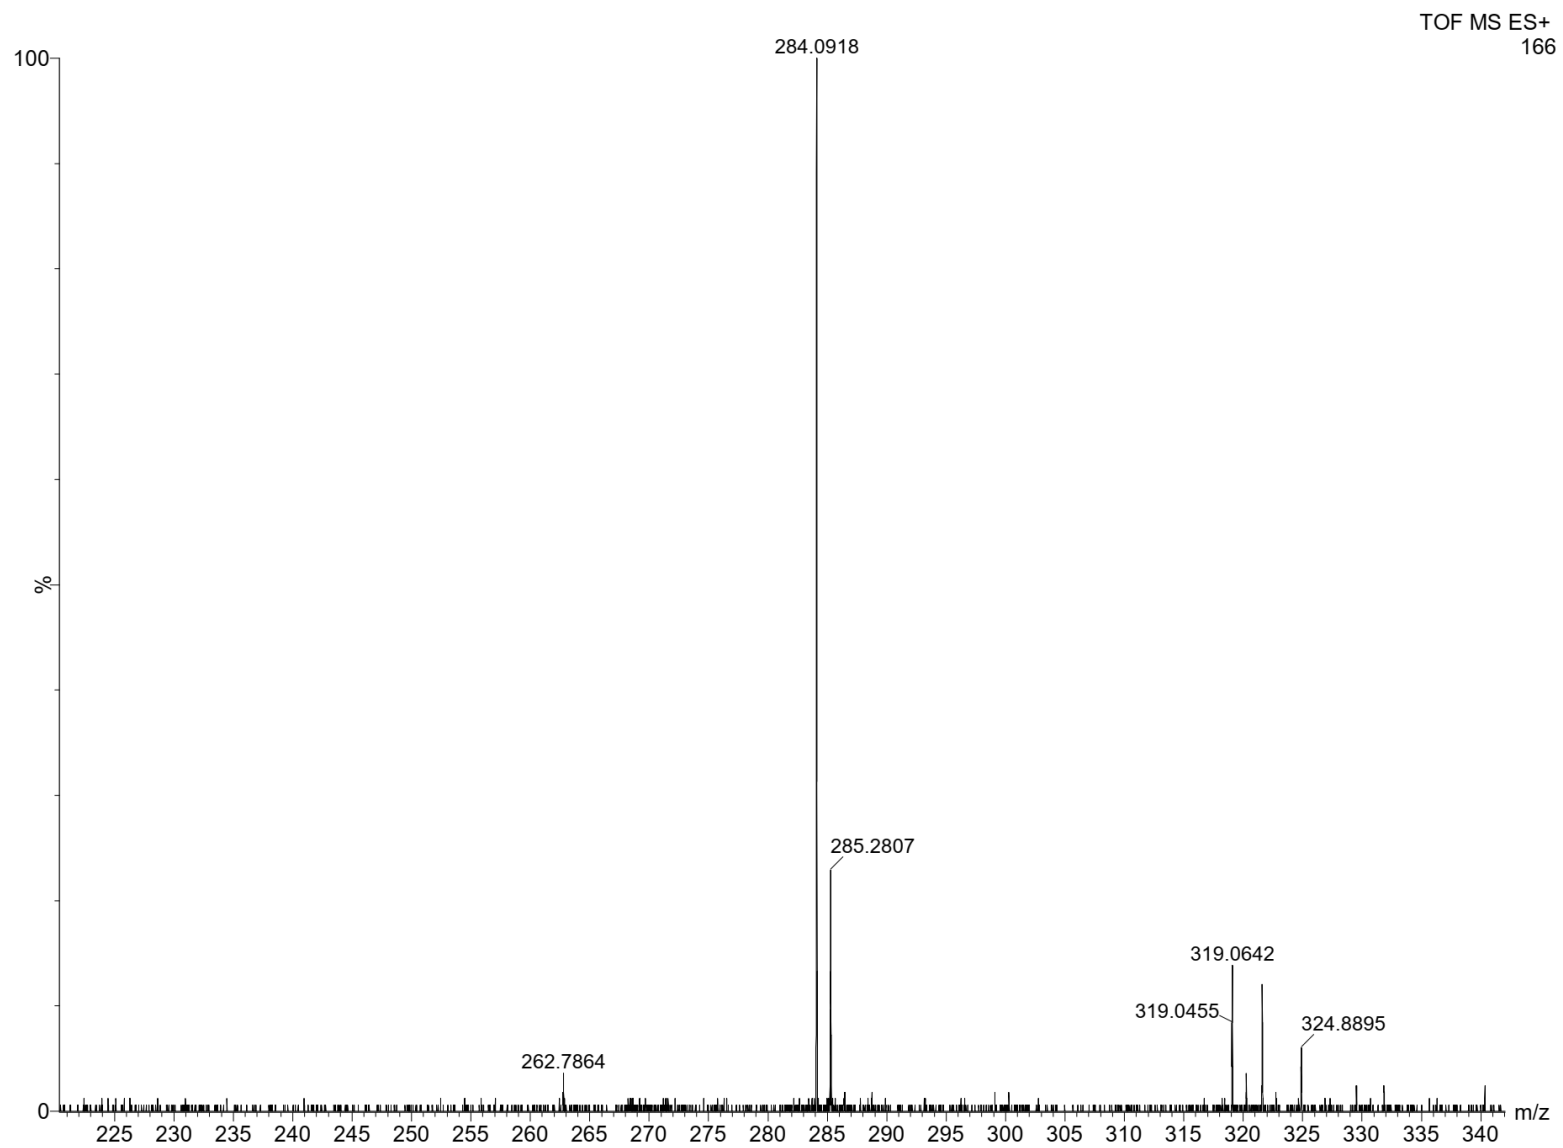

Figure S41. HRMS-ESI 2-isocyno-5-methoxyphenyl 4-methoxybenzoate (1m).

# Supporting Information

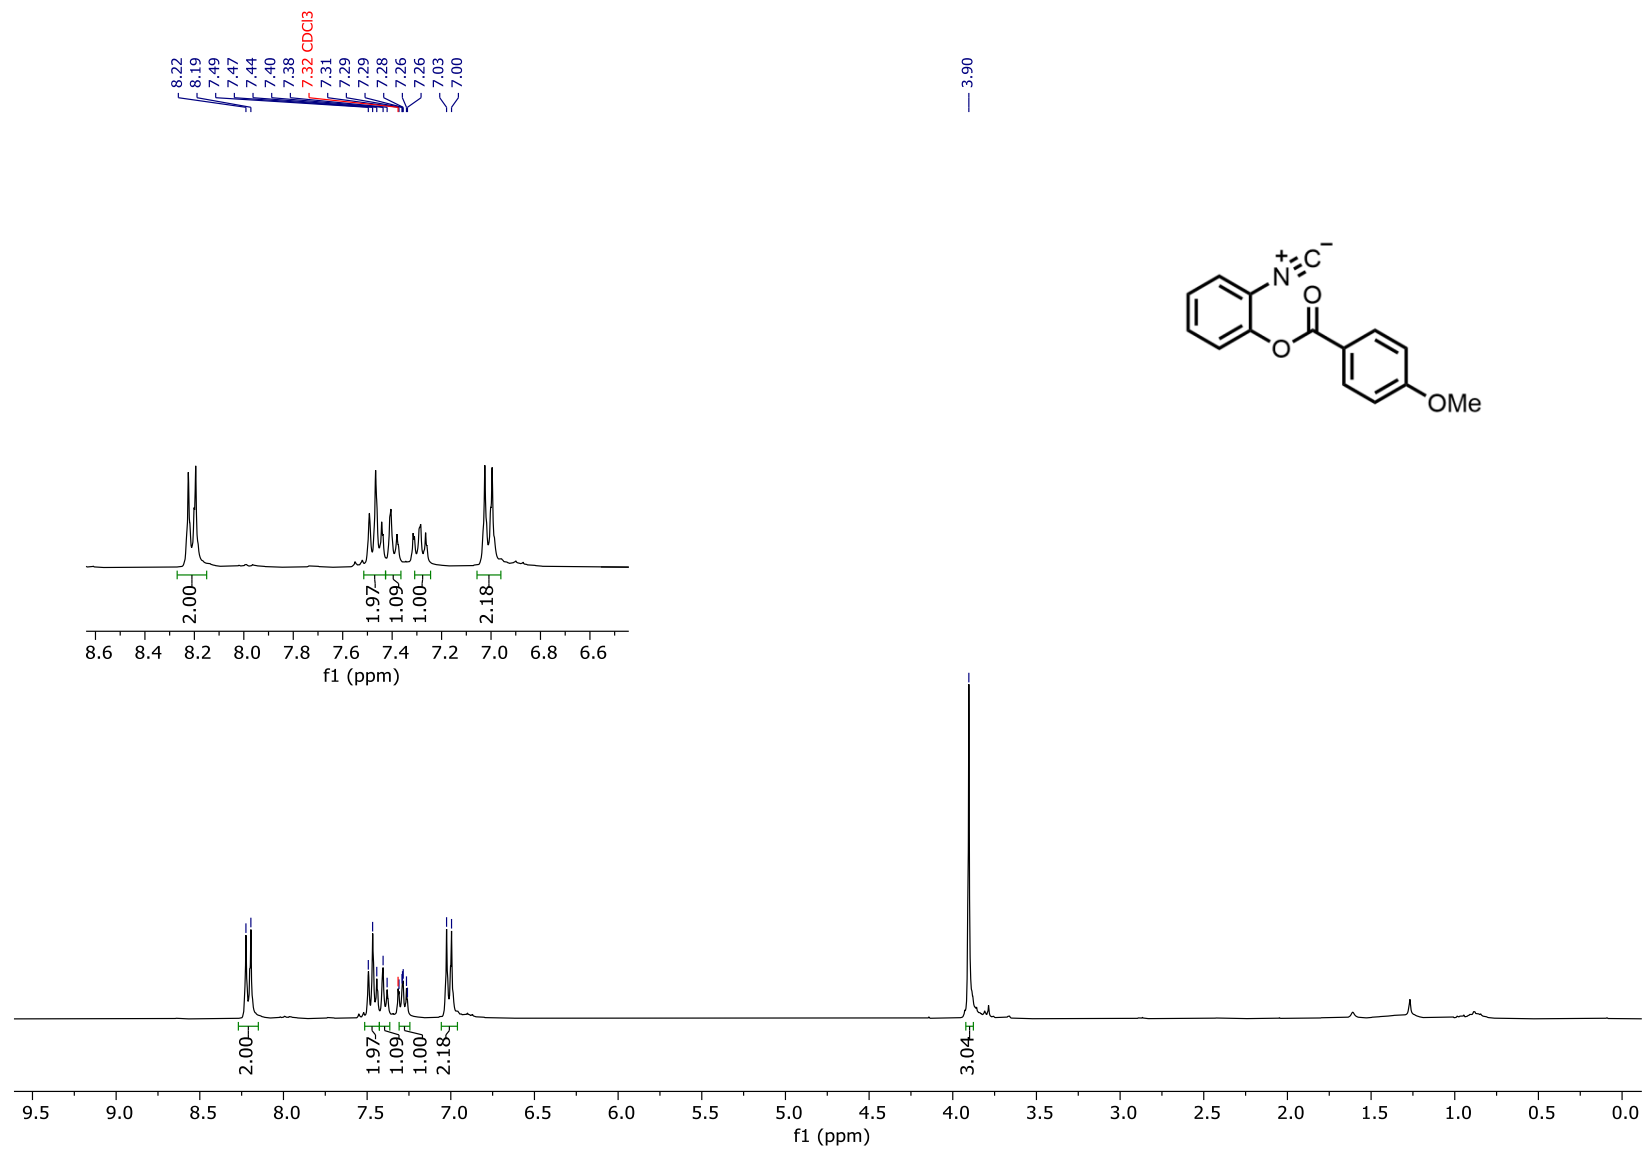

Figure S42. <sup>1</sup>H NMR (300 MHz, CDCl<sub>3</sub>) 2-isocyanophenyl 4-methoxybenzoate (1n).

# Supporting Information

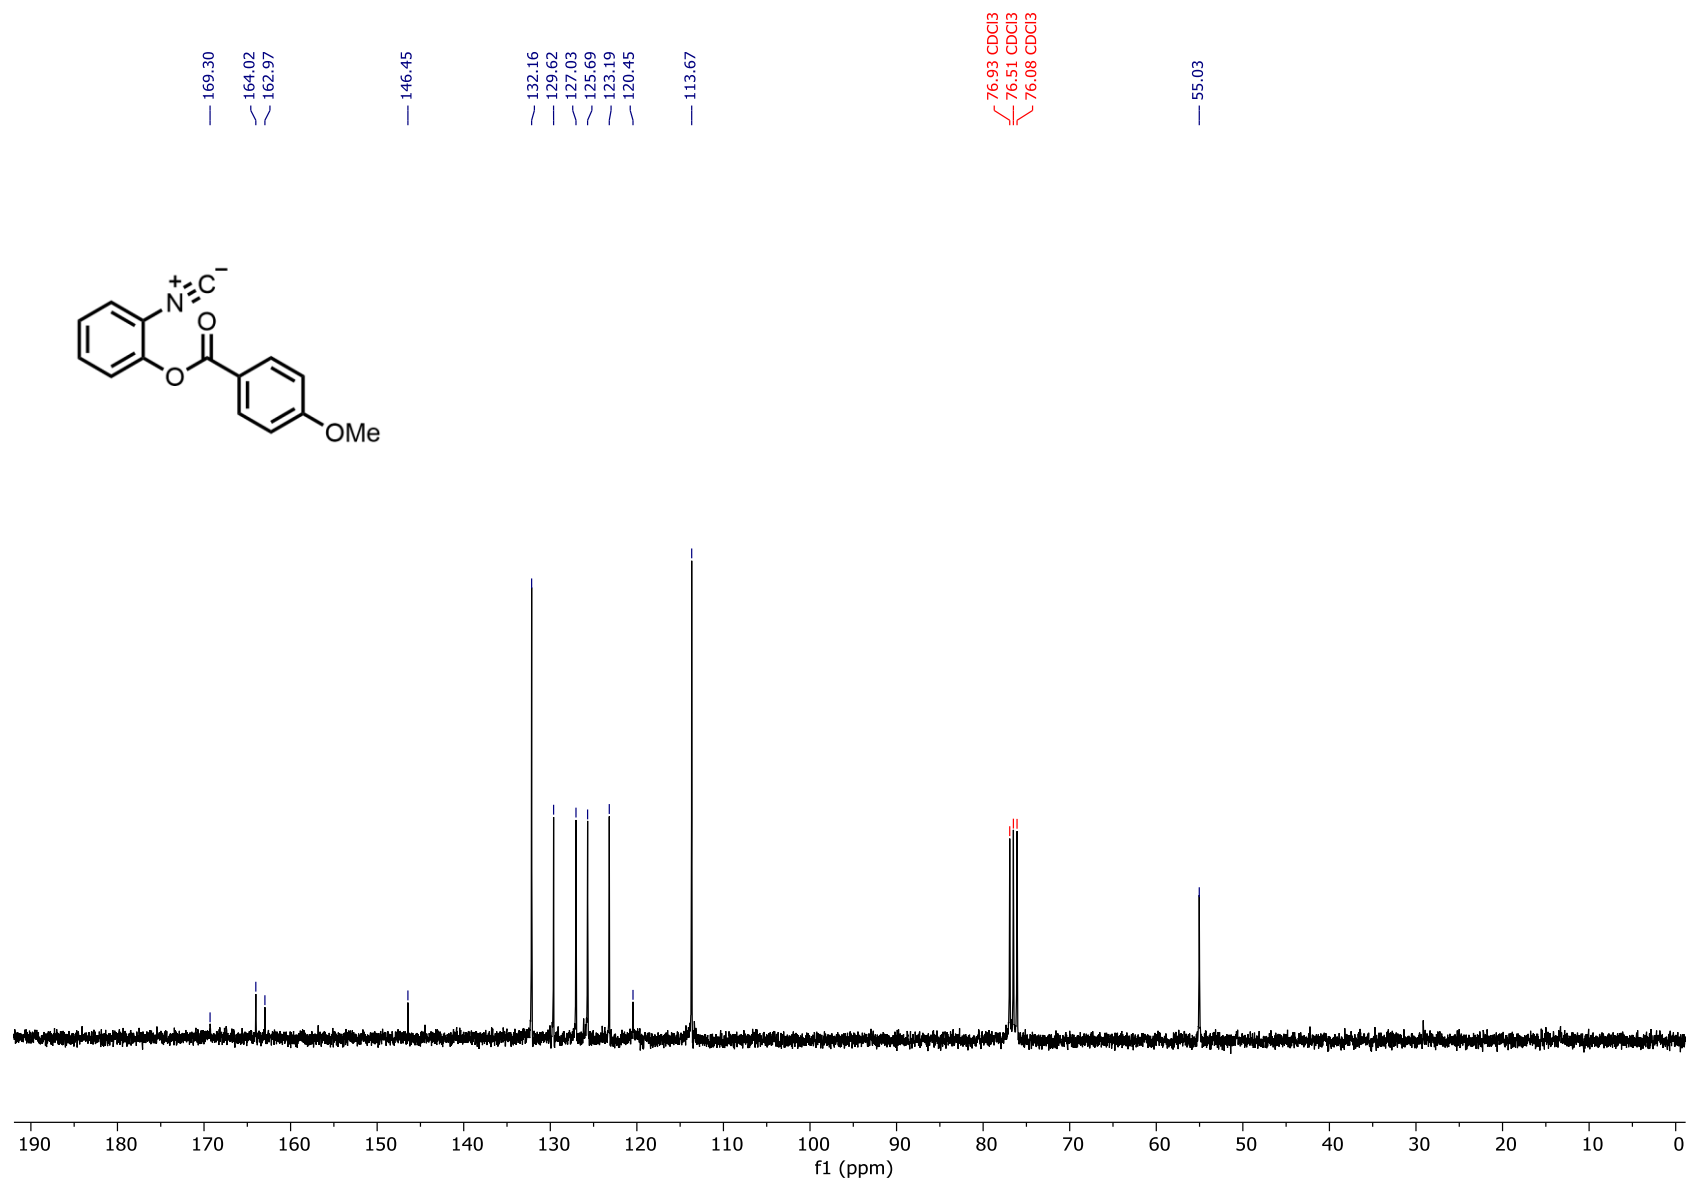

Figure S43.  $^{13}\text{C}$  NMR (75 MHz,  $\text{CDCl}_3$ ) 2-isocyanophenyl 4-methoxybenzoate (1n).

# Supporting Information

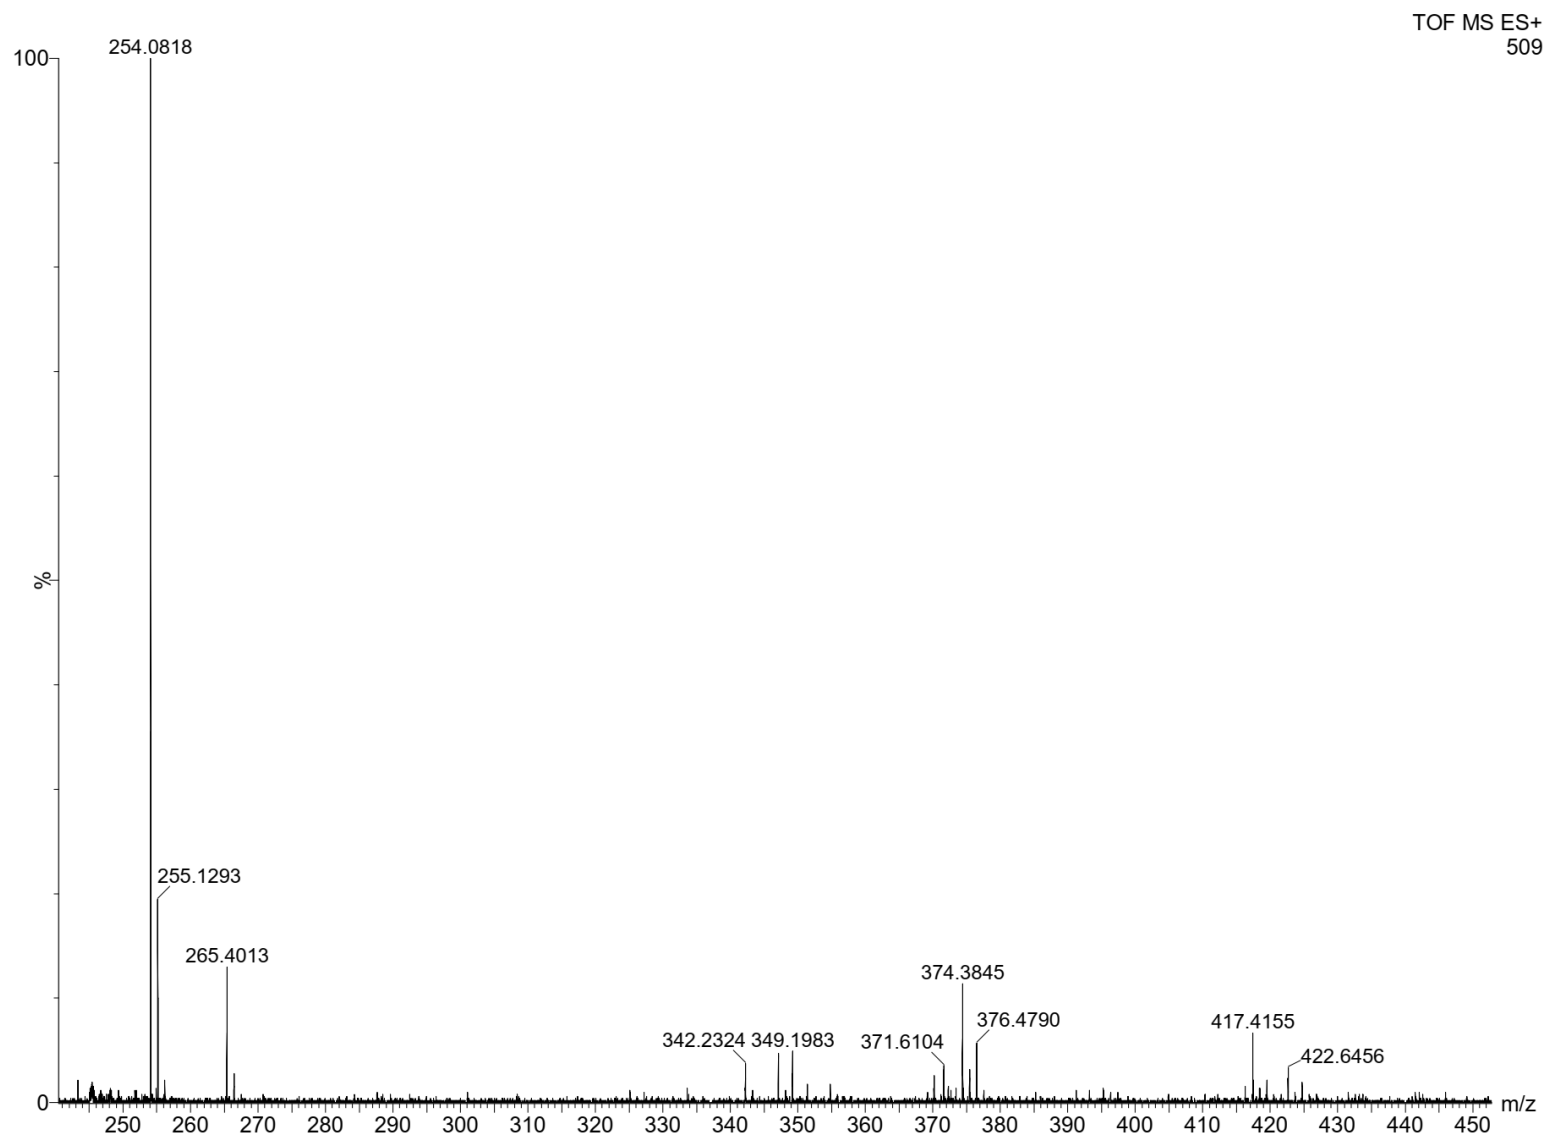

Figure S44. HRMS-ESI 2-isocyanophenyl 4-methoxybenzoate (1n).



# Supporting Information

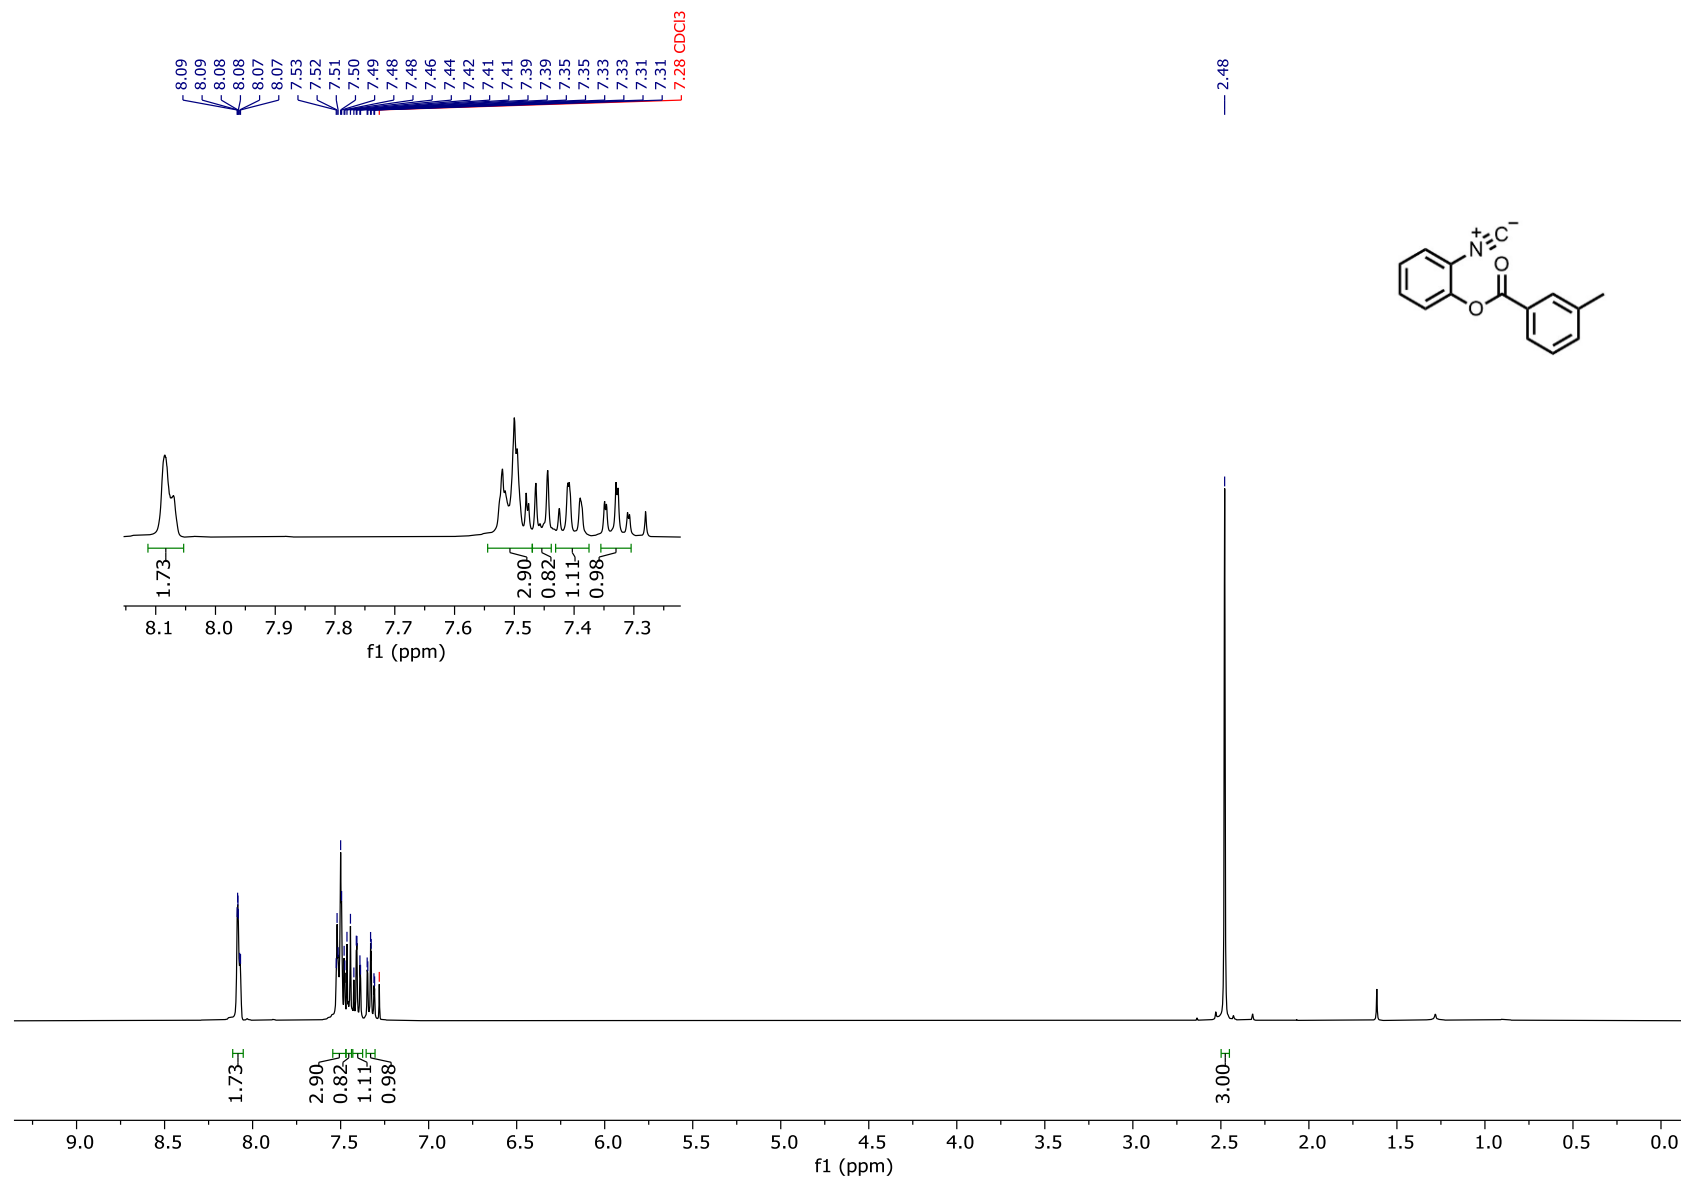

Figure S45.  $^1\text{H}$  NMR (400 MHz,  $\text{CDCl}_3$ ) 2-isocyanophenyl 3-methylbenzoate (10).

# Supporting Information

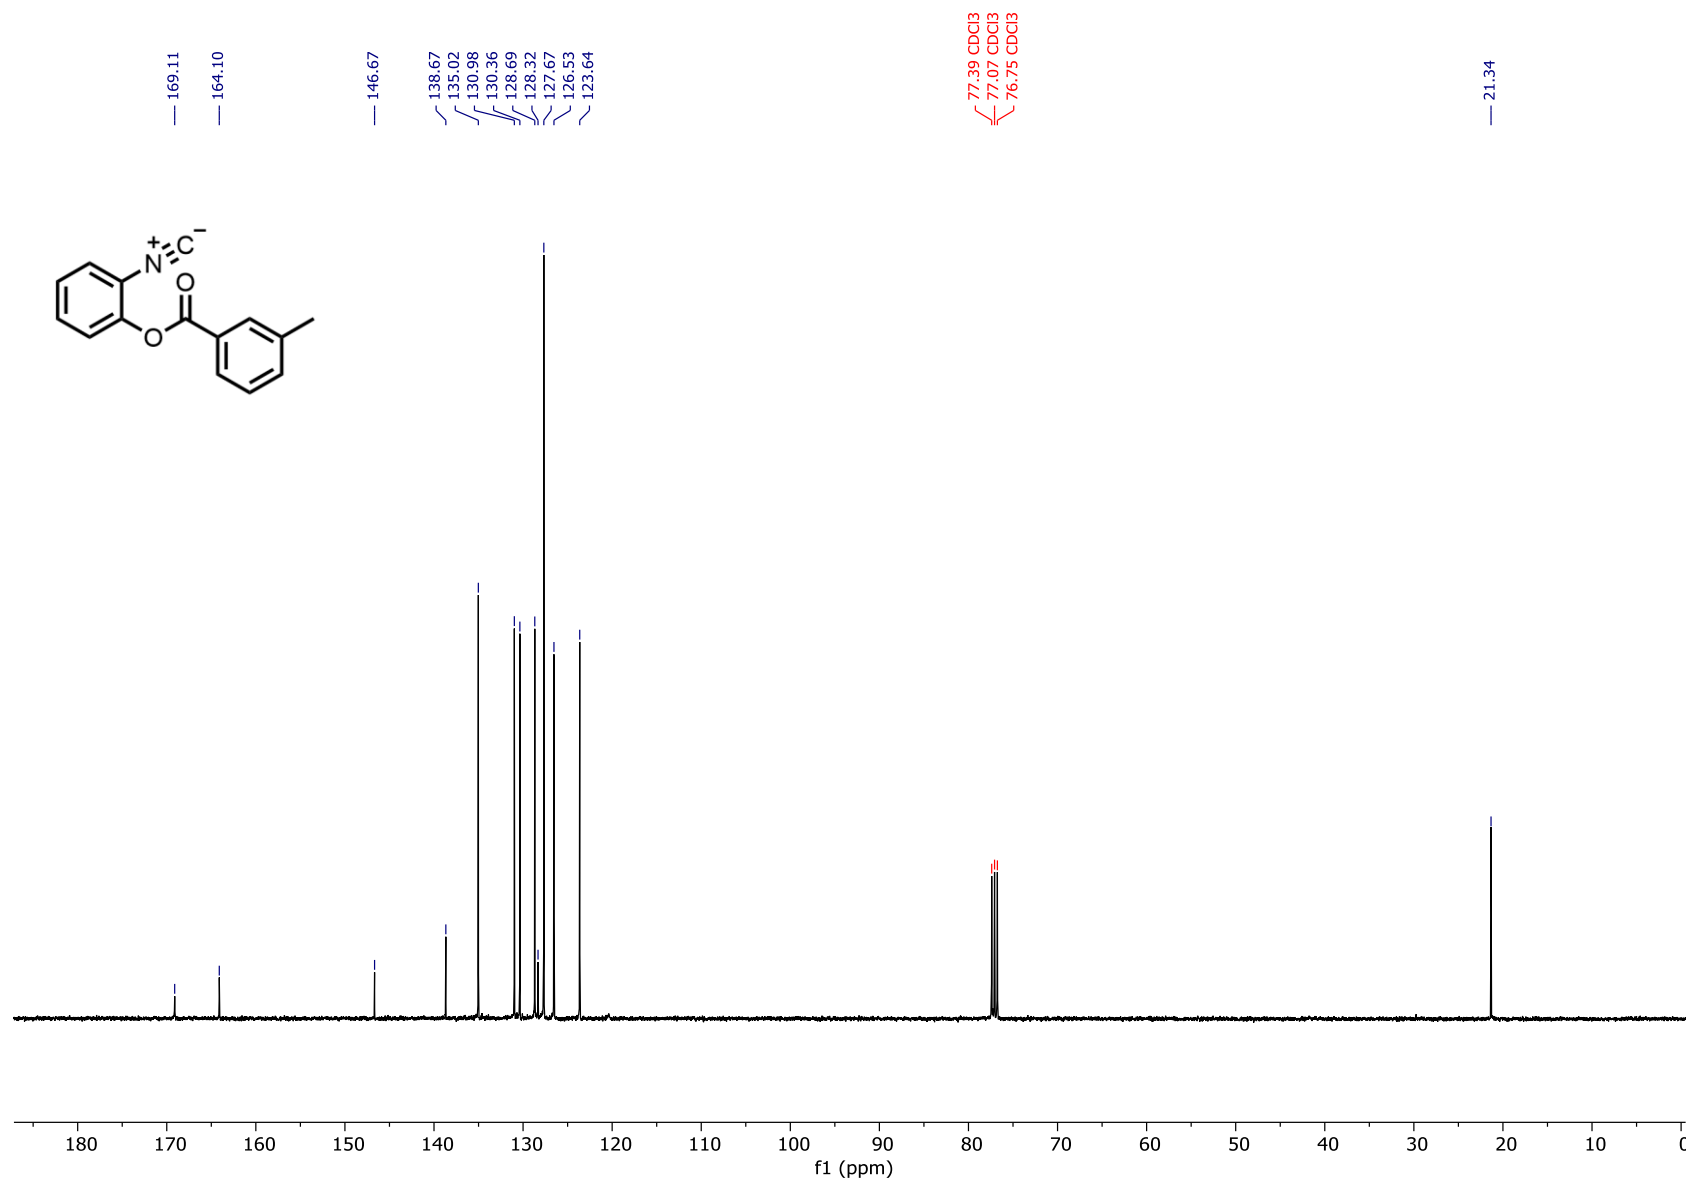

Figure S46.  $^{13}\text{C}$  NMR (101 MHz,  $\text{CDCl}_3$ ) 2-isocyanophenyl 3-methylbenzoate (1o).

## Supporting Information

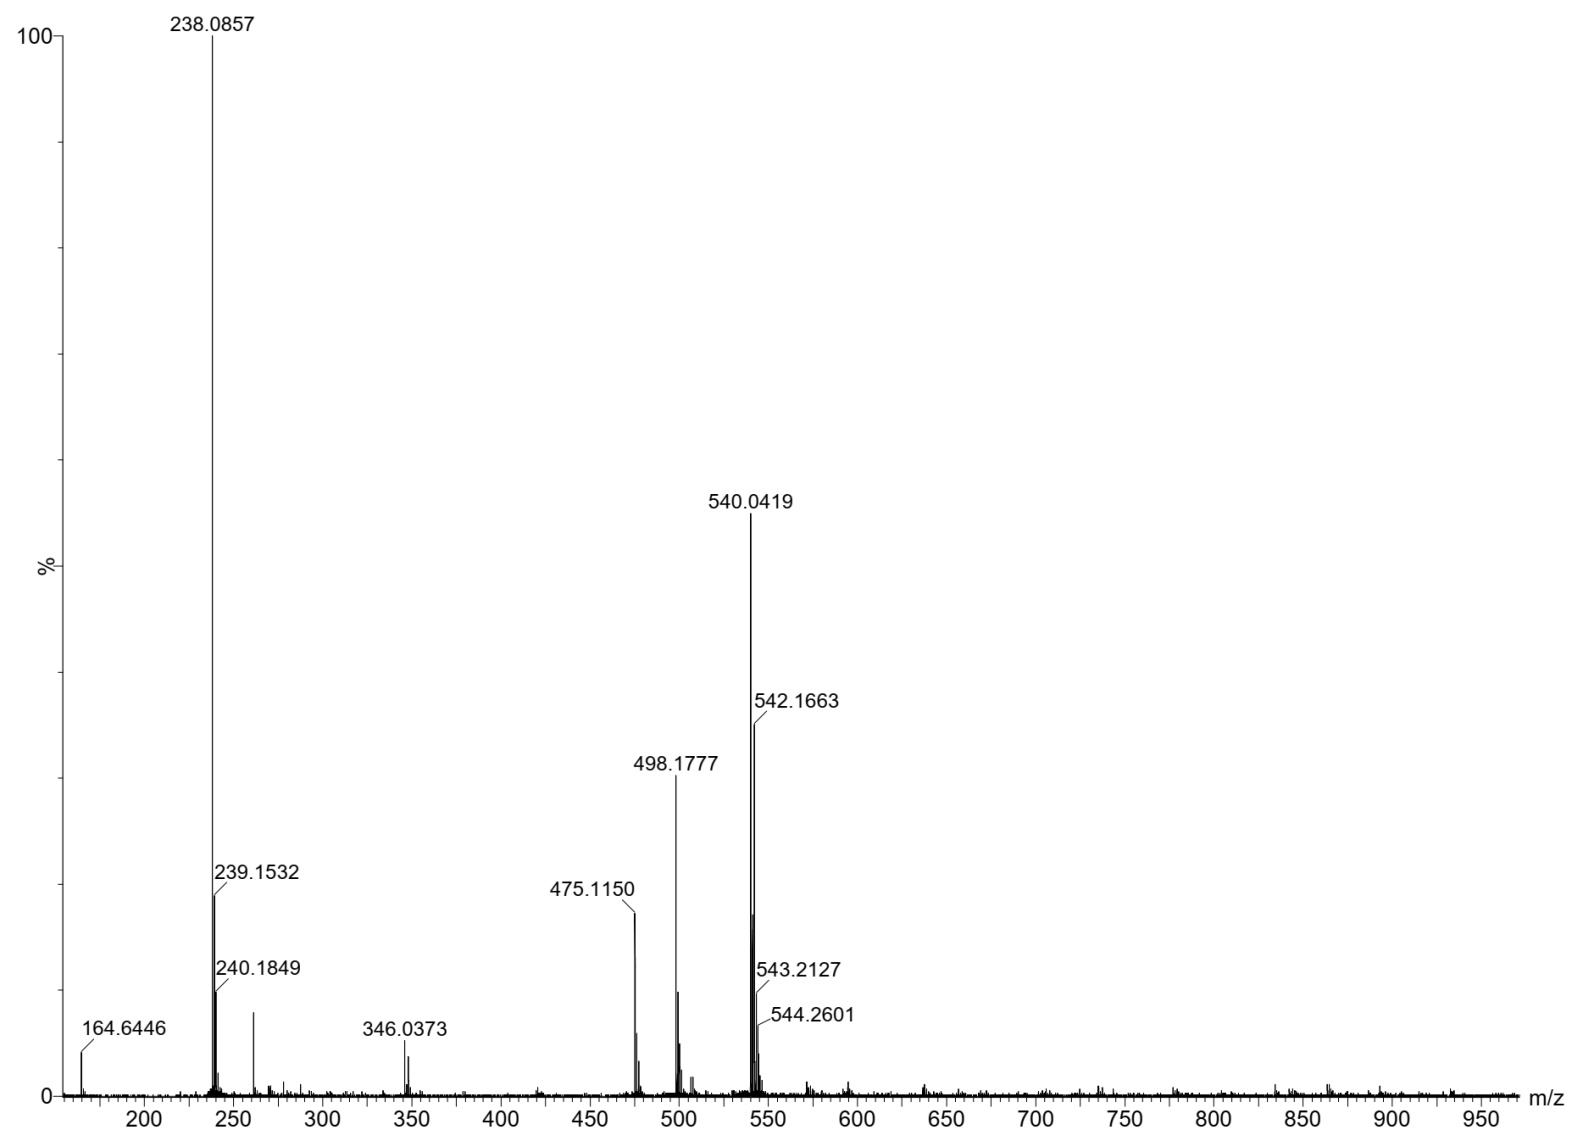

Figure S47. HRMS-ESI 2-isocyanophenyl 3-methylbenzoate (1o).

# Supporting Information

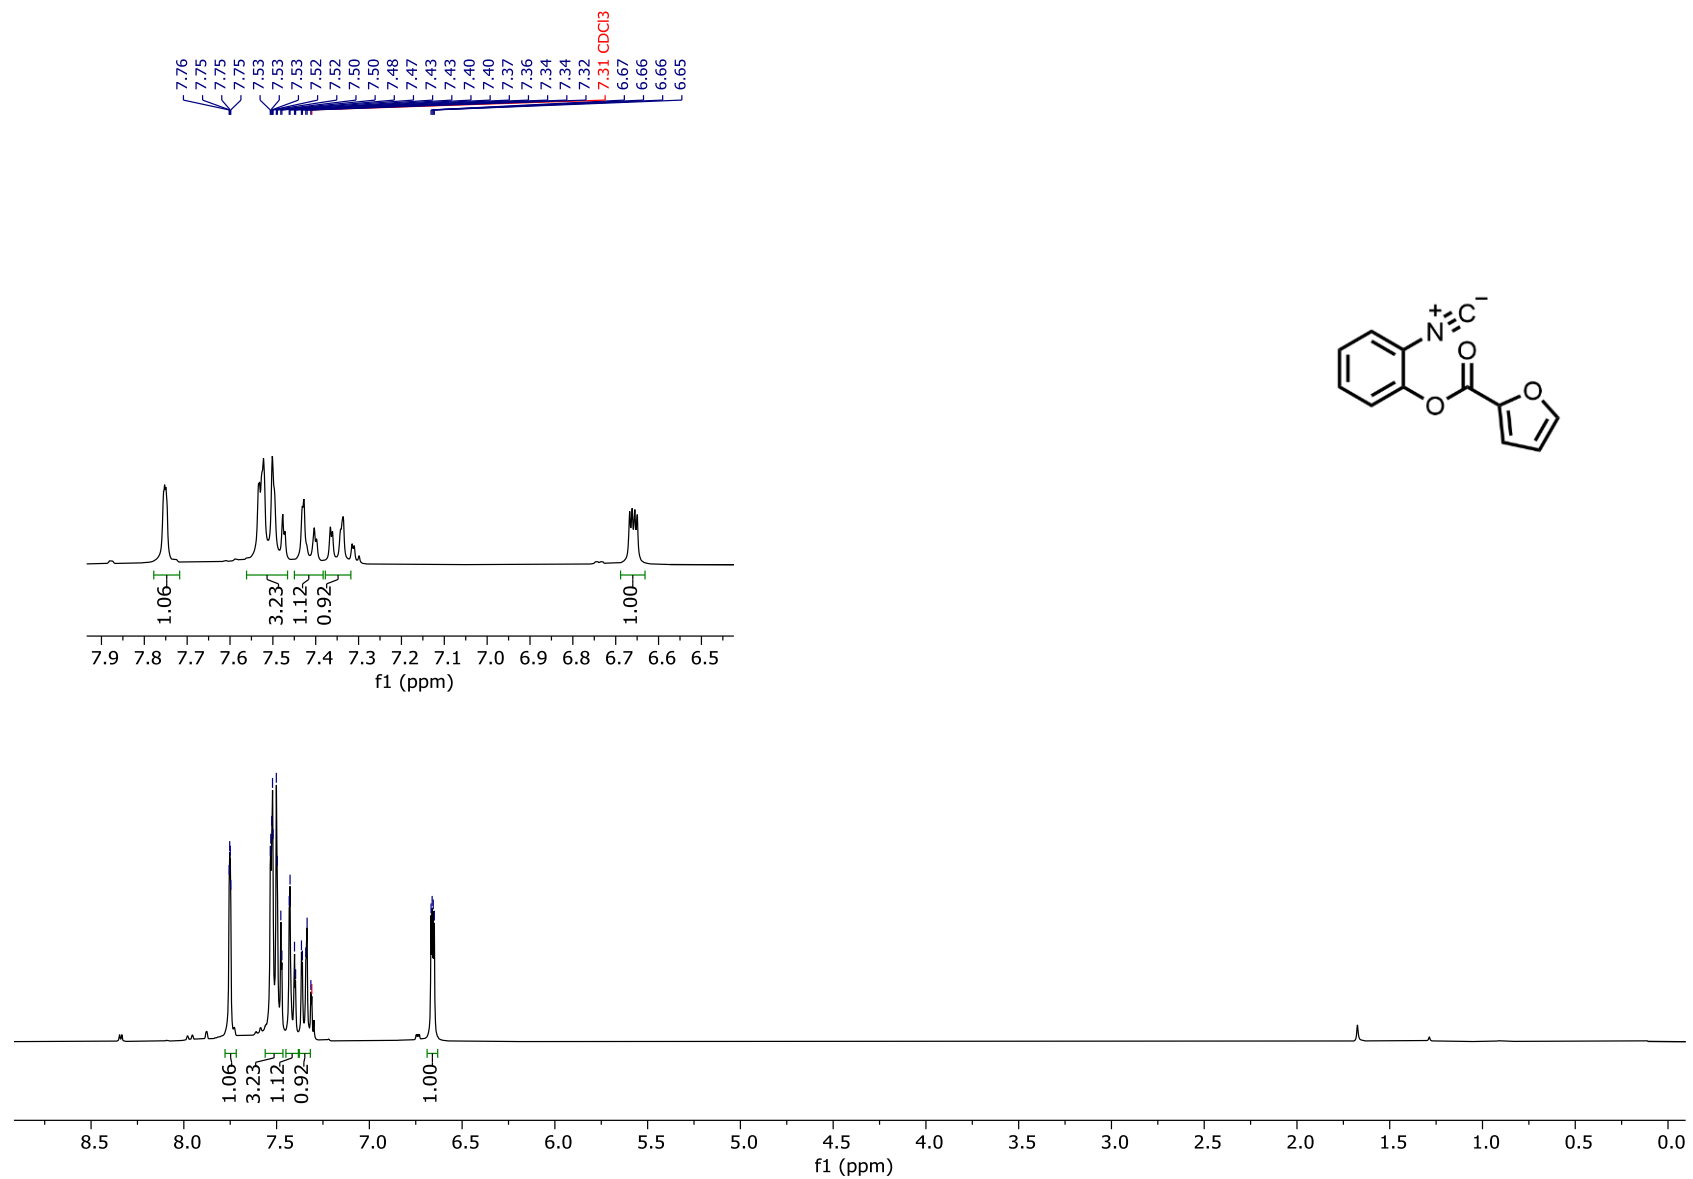

# Supporting Information

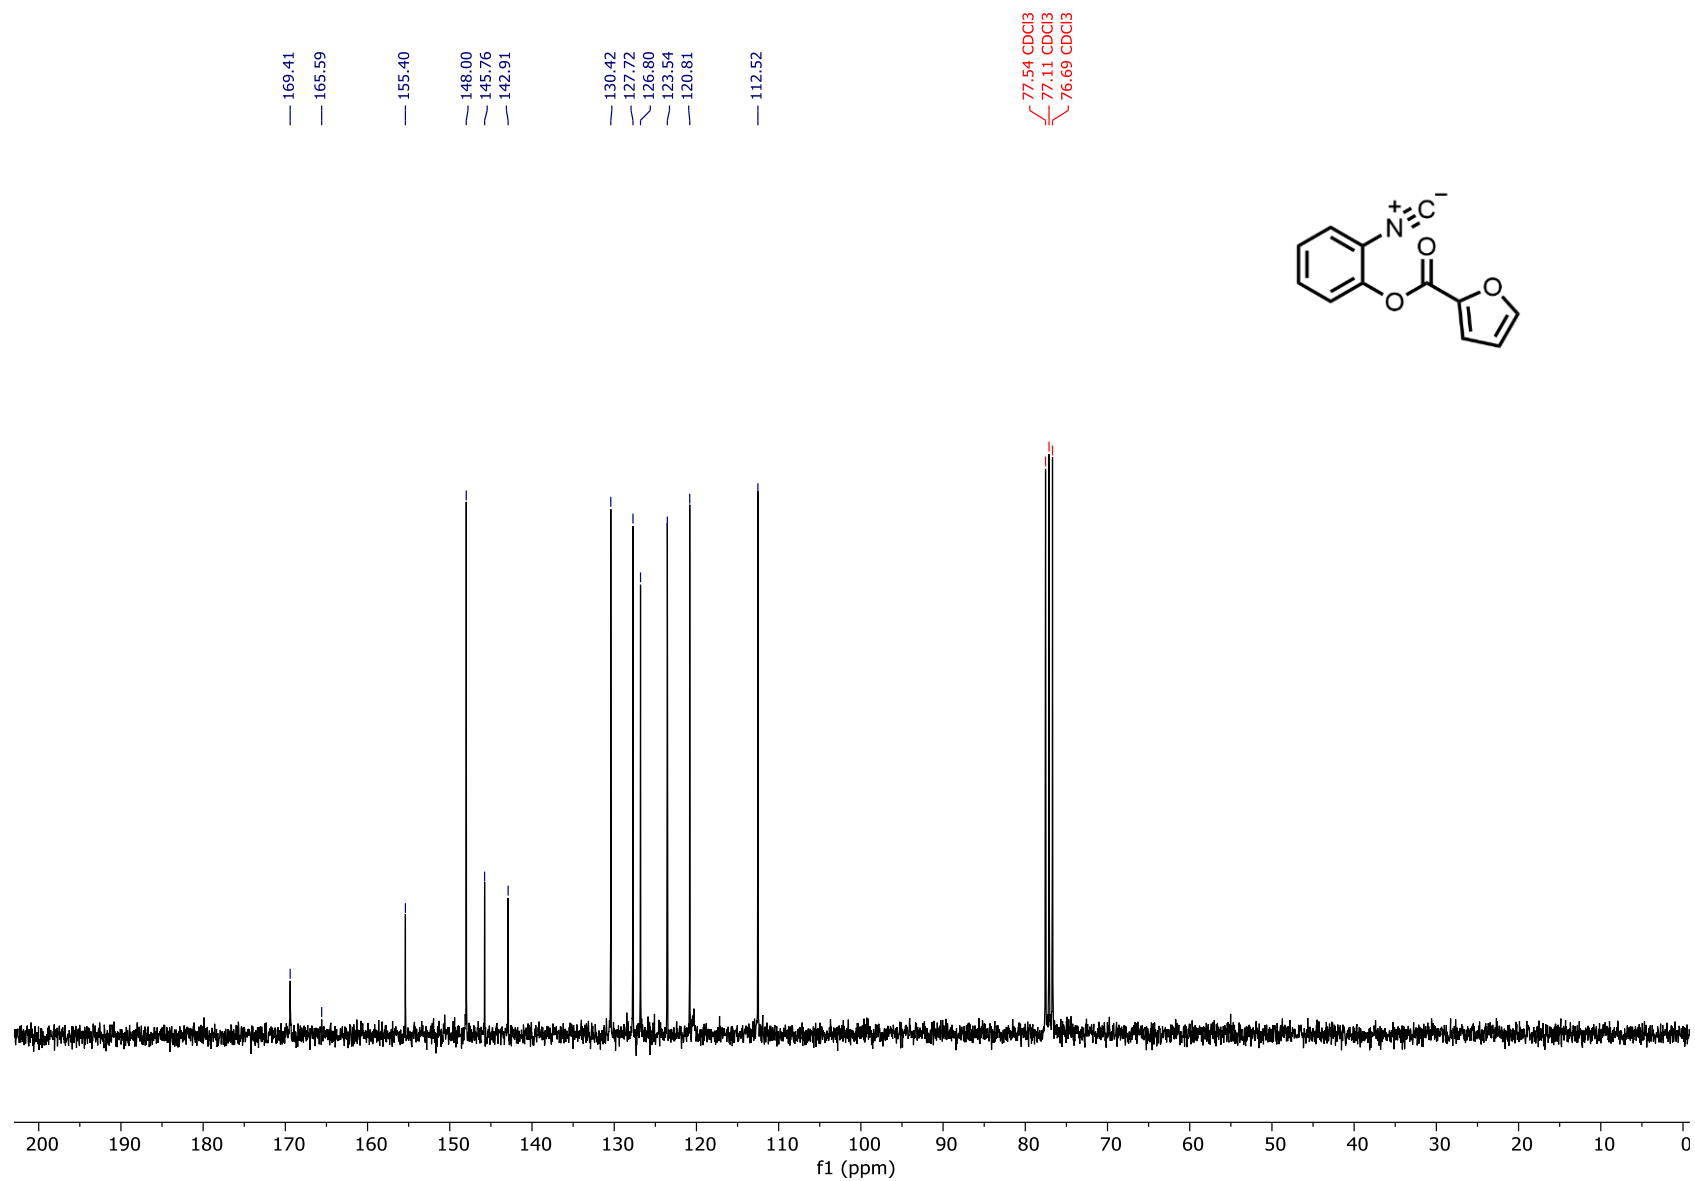

Figure S49. <sup>13</sup>C NMR (76 MHz, CDCl<sub>3</sub>) 2-isocyanophenyl furan-2-carboxylate (1p).

# Supporting Information

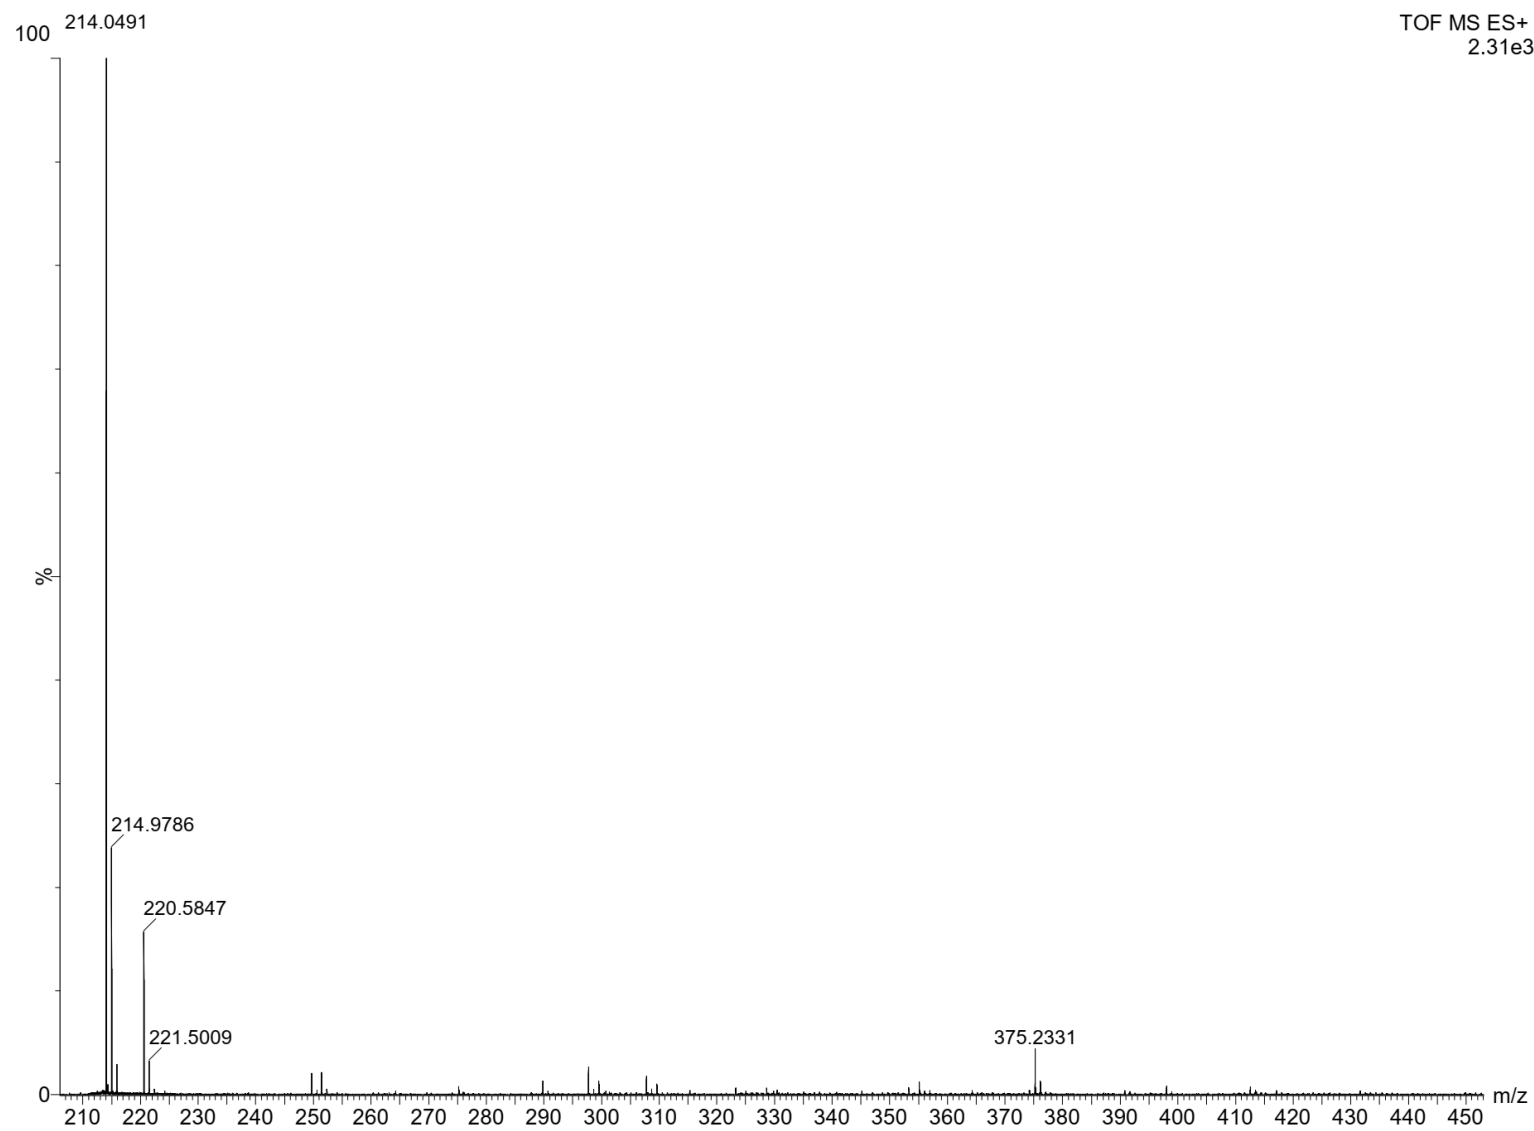

Figure S50. HRMS-ESI 2-isocyanophenyl furan-2-carboxylate (1p).

# Supporting Information

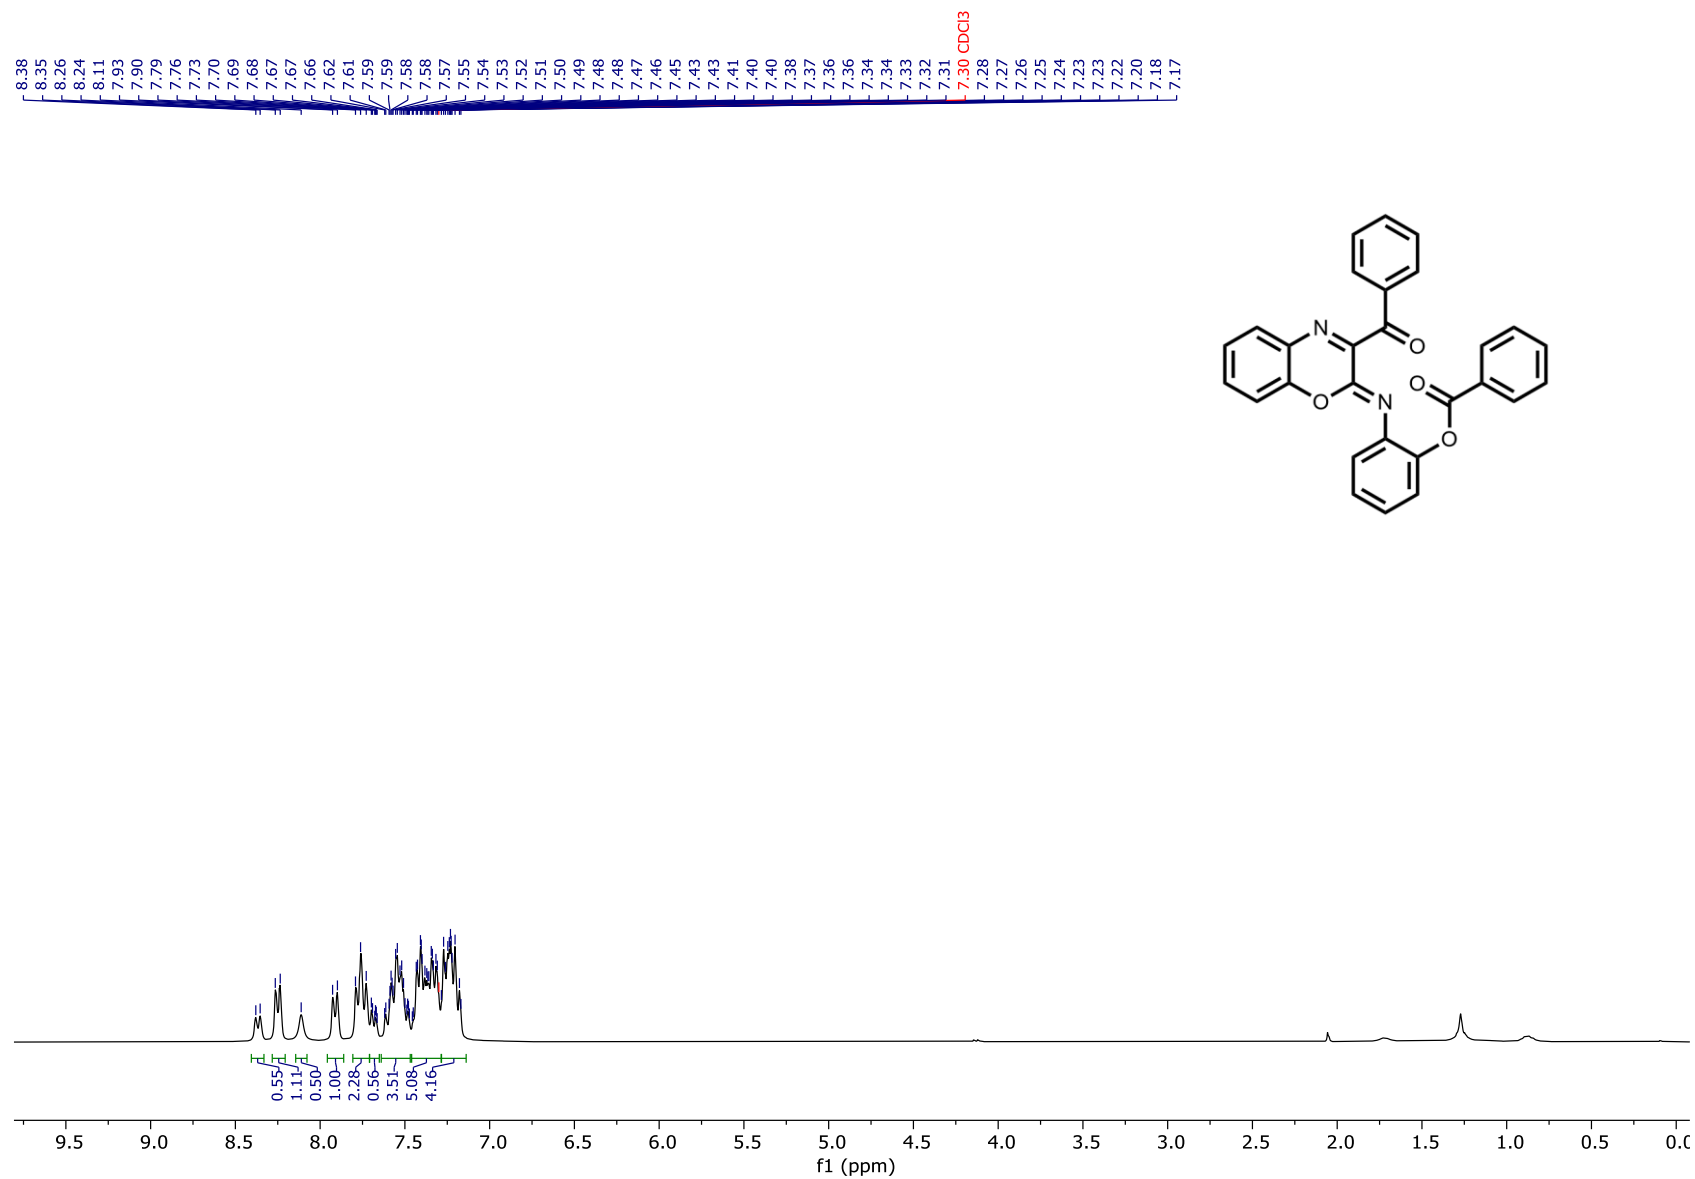

Figure S51. <sup>1</sup>H NMR (300 MHz, CDCl<sub>3</sub>) (Z)-2-((3-benzoyl-2H-benzo[b][1,4]oxazin-2-ylidene)amino)phenyl benzoate (2a).

# Supporting Information

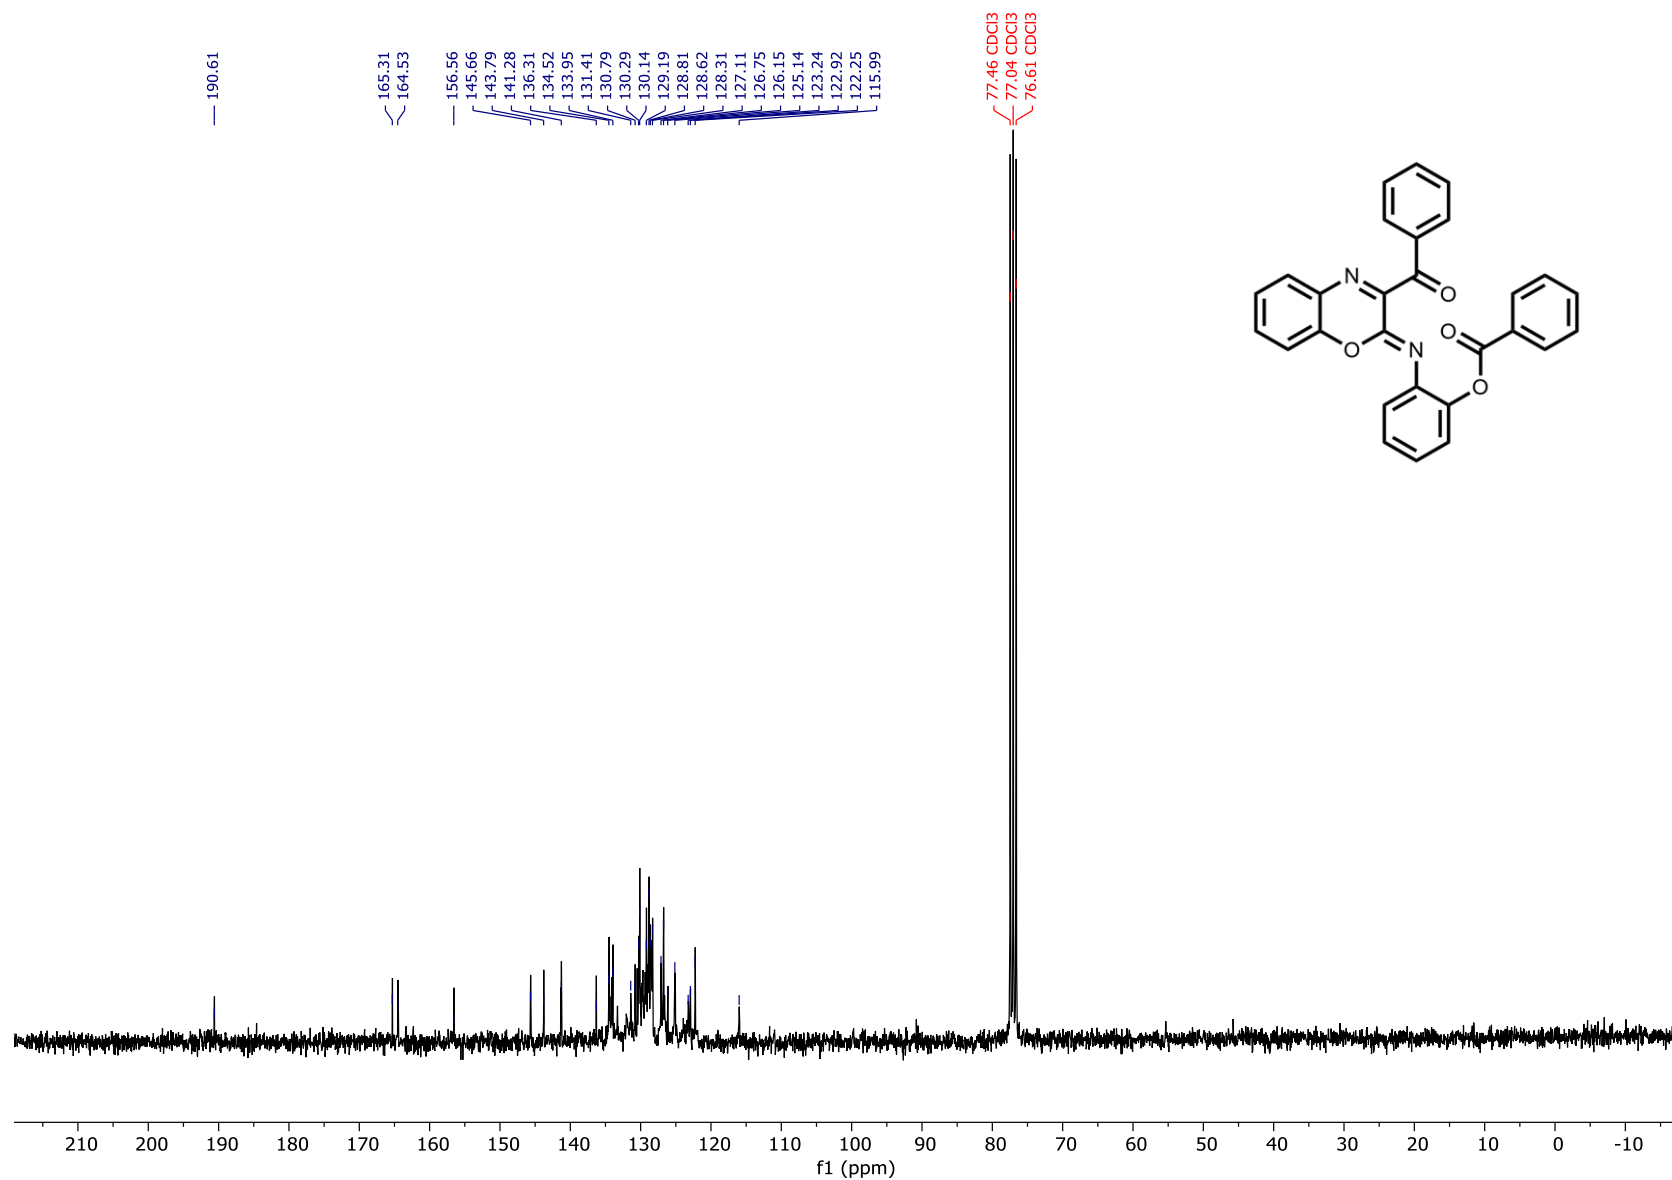

Figure S52.  $^{13}\text{C}$  NMR (75 MHz,  $\text{CDCl}_3$ ) (Z)-2-((3-benzoyl-2H-benzo[b][1,4]oxazin-2-ylidene)amino)phenyl benzoate (2a).



## Supporting Information

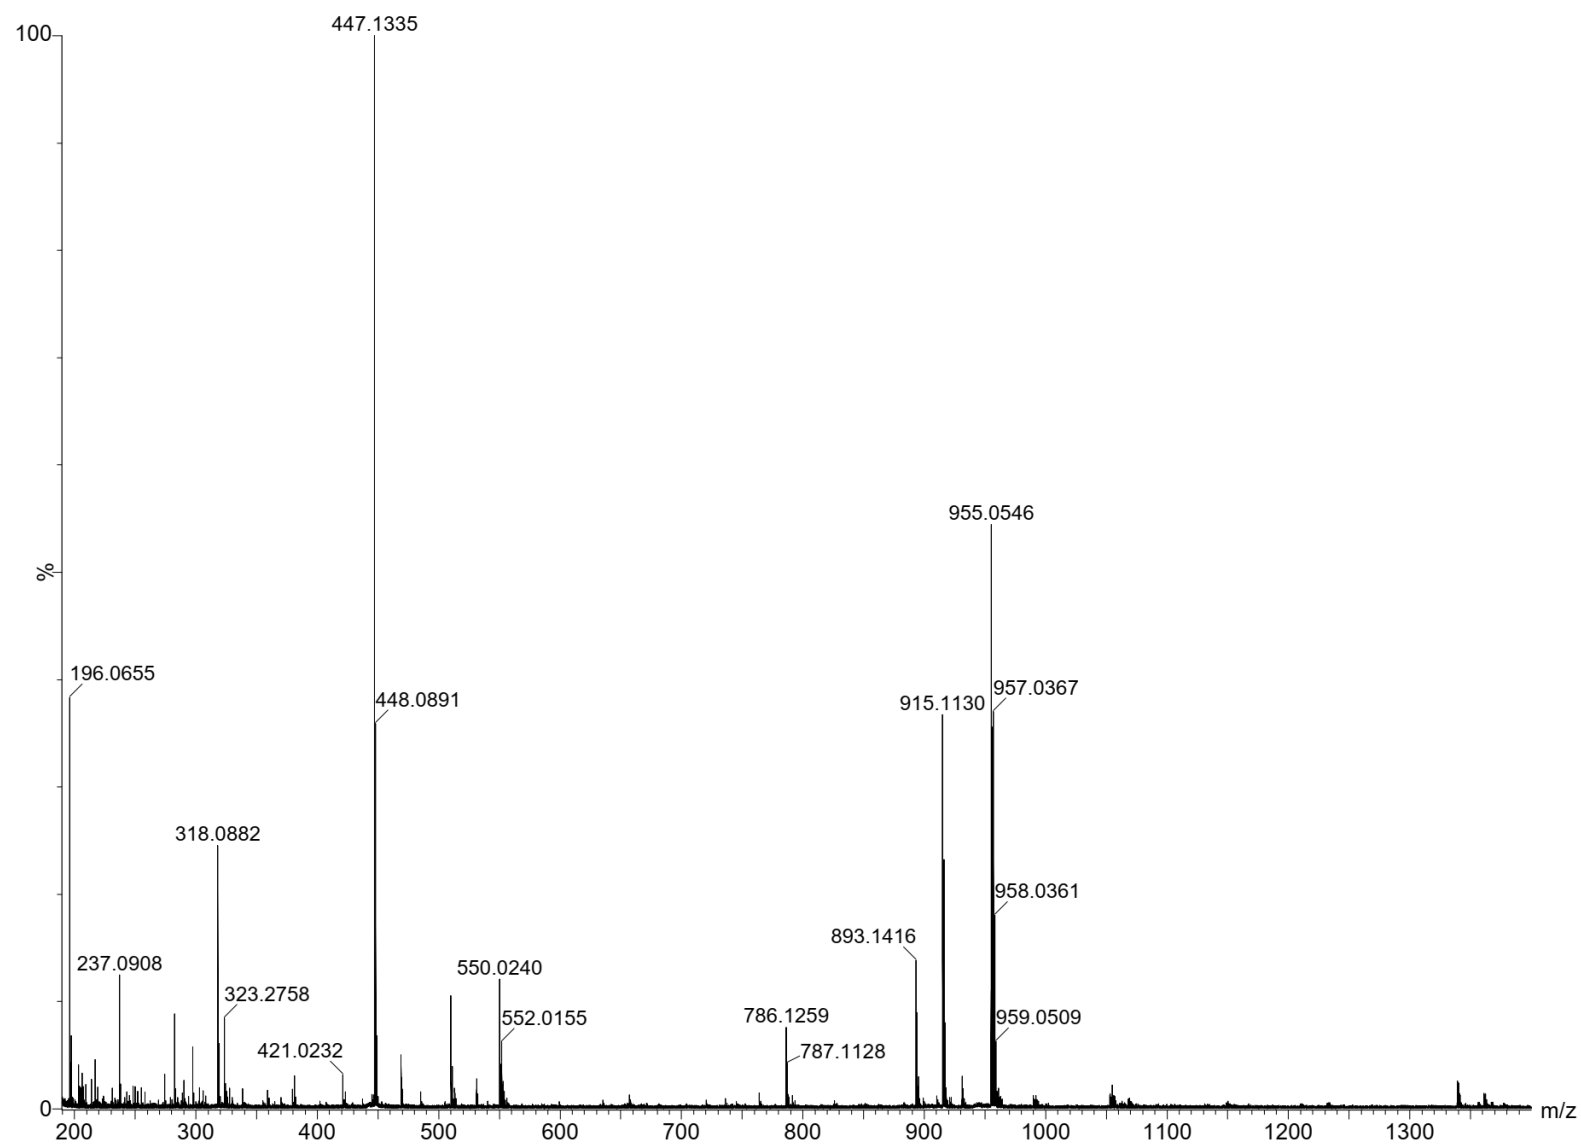

Figure S53. HRMS-ESI (Z)-2-((3-benzoyl-2H-benzo[b][1,4]oxazin-2-ylidene)amino)phenyl benzoate (2a).

# Supporting Information

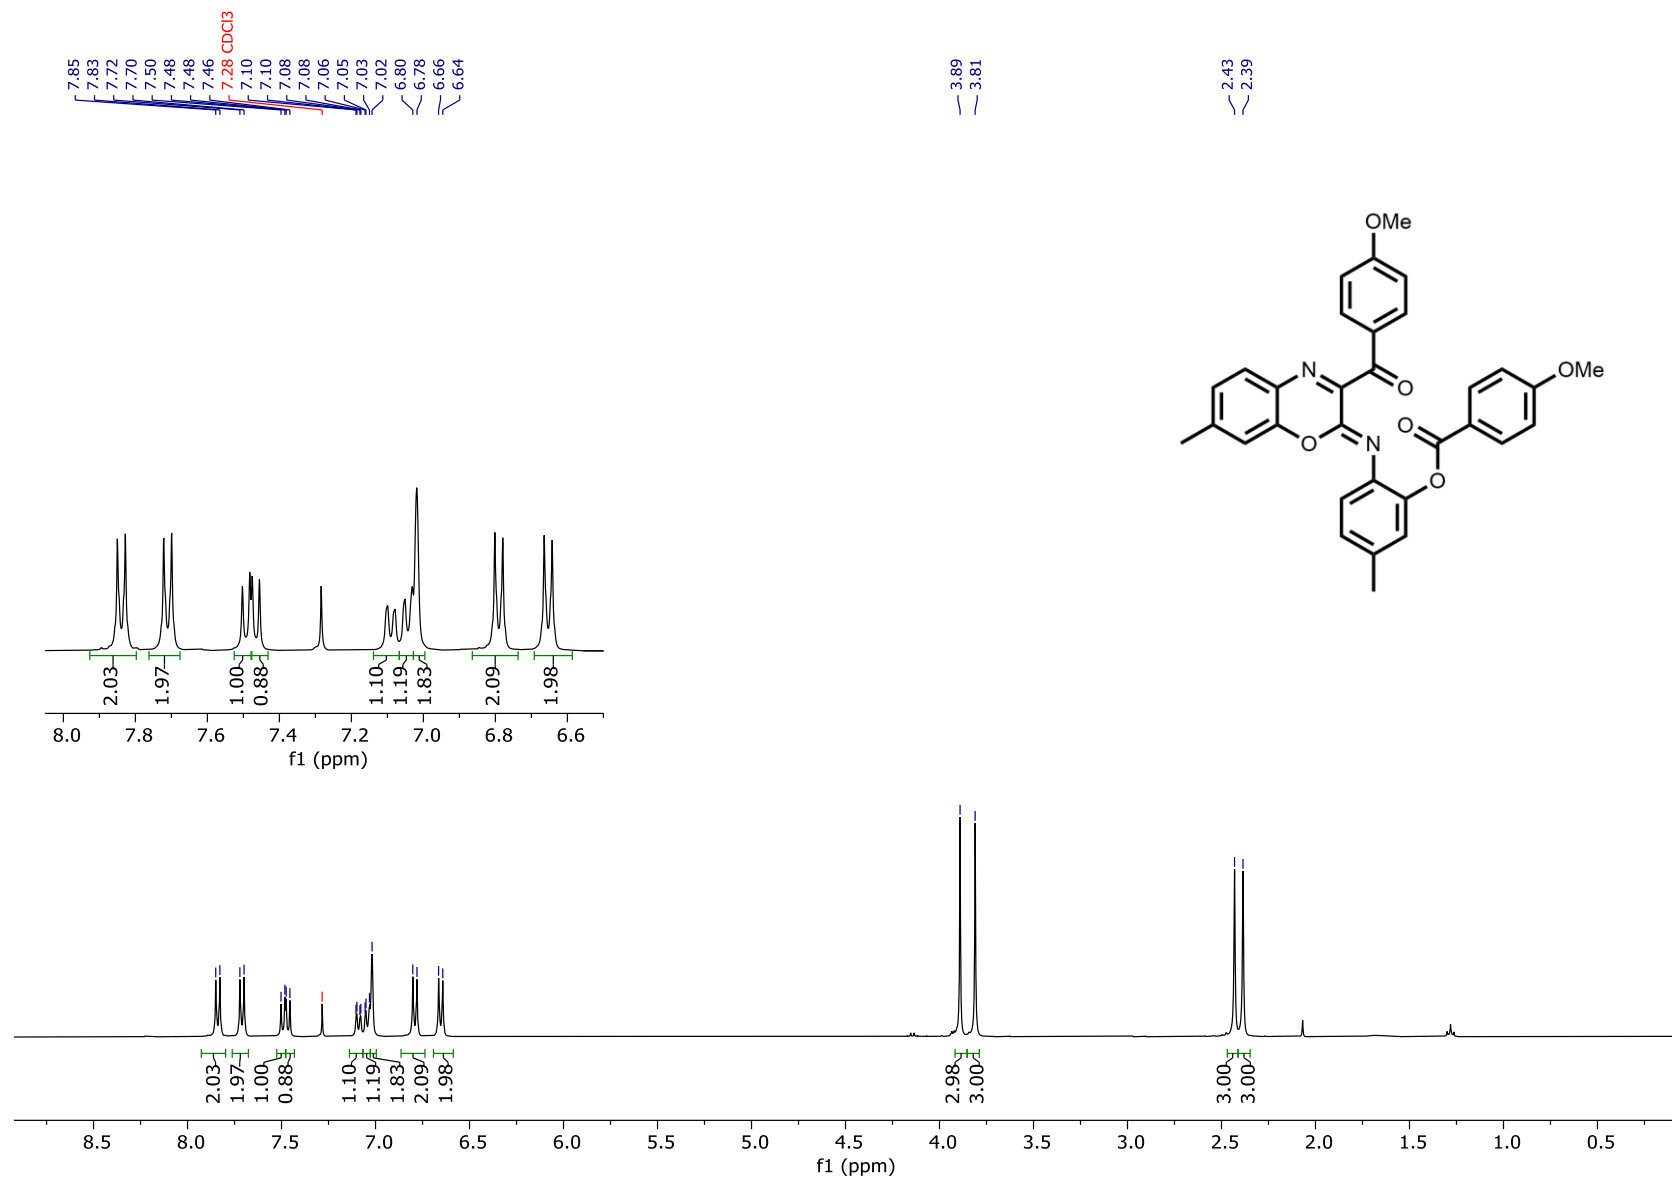

# Supporting Information

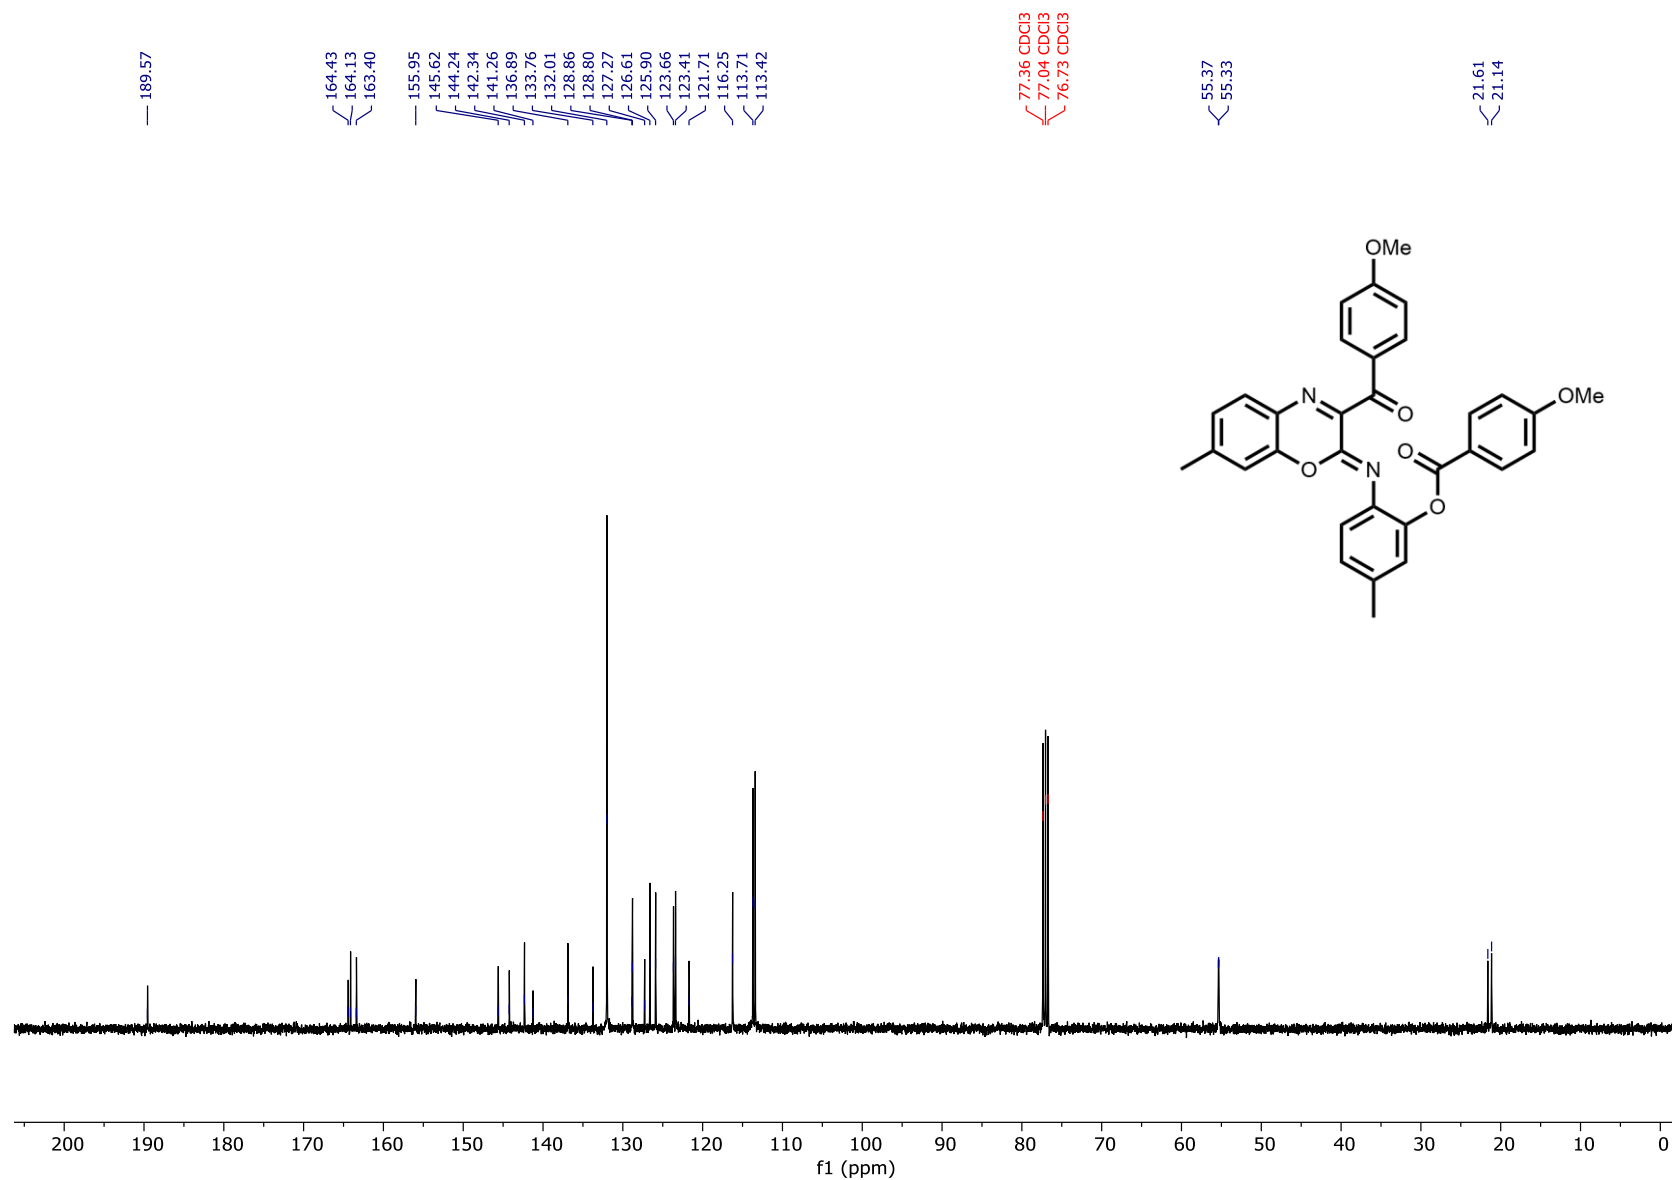

Figure S55. <sup>13</sup>C NMR (101 MHz, CDCl<sub>3</sub>) (Z)-2-((3-(4-methoxybenzoyl)-7-methyl-2H-benzo[b][1,4]oxazin-2-ylidene)amino)-5-methylphenyl 4-methoxybenzoate (2b).

## Supporting Information

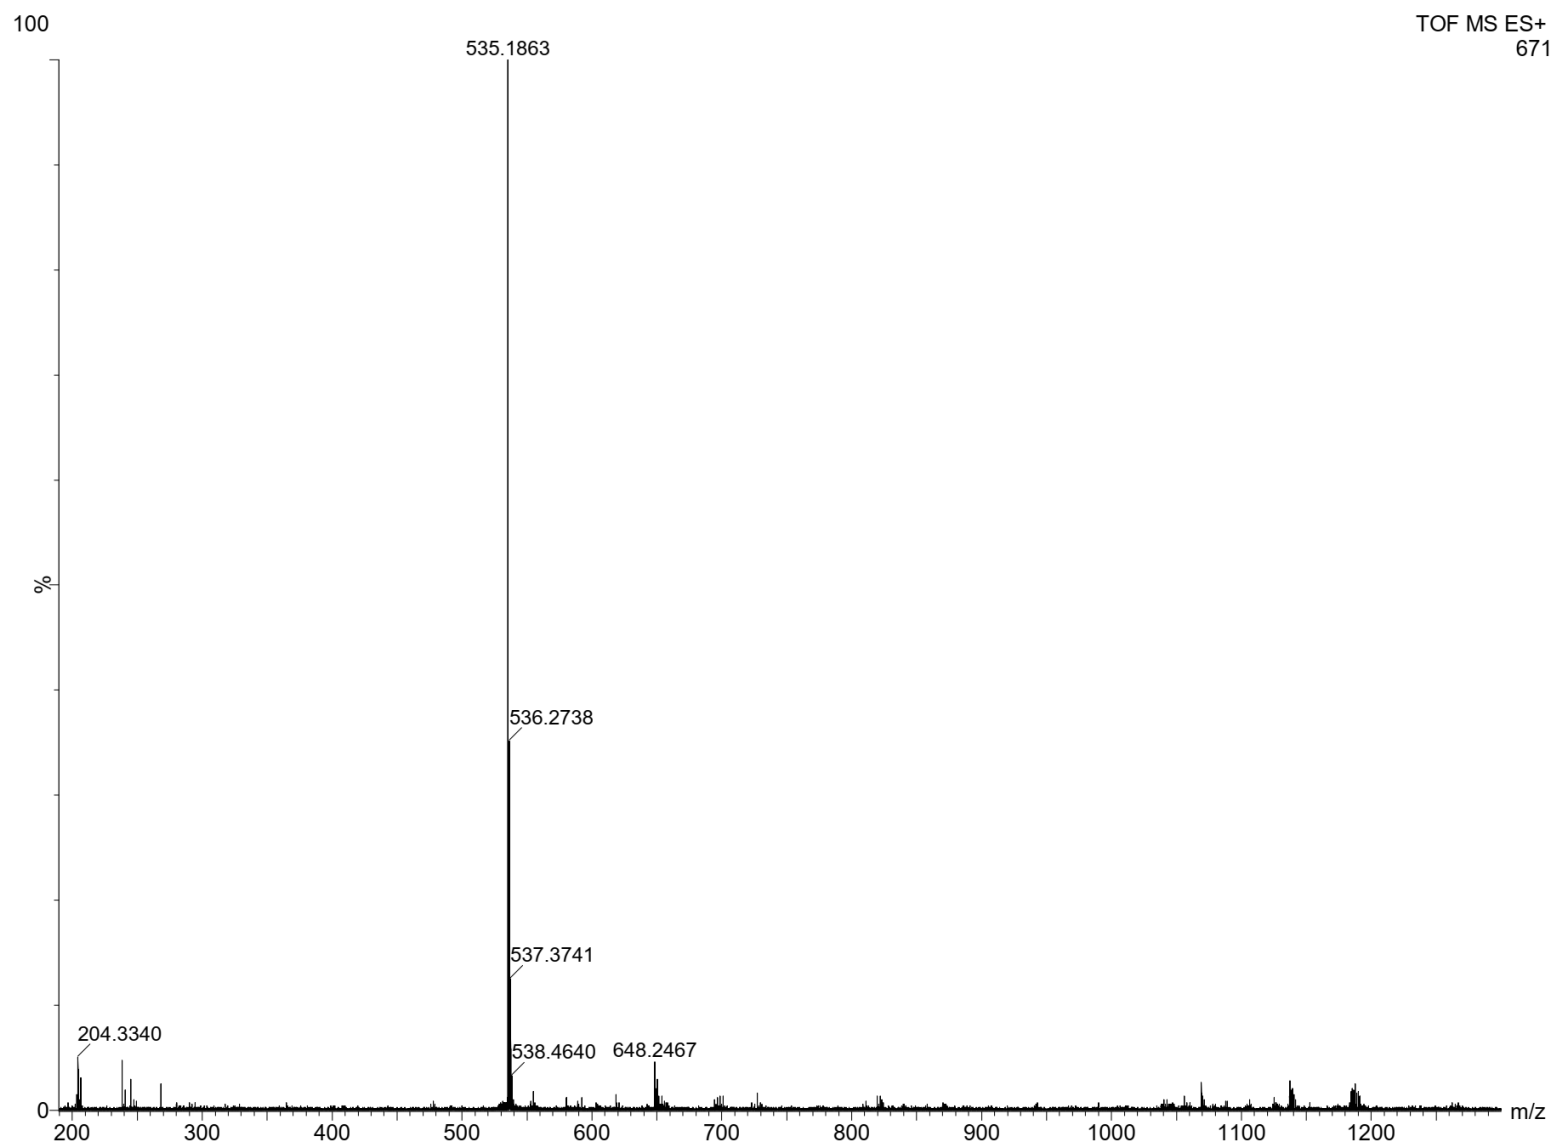

Figure S56. HRMS-ESI (Z)-2-((3-(4-methoxybenzoyl)-7-methyl-2H-benzo[b][1,4]oxazin-2-ylidene)amino)-5-methylphenyl 4-methoxybenzoate (2b).

# Supporting Information

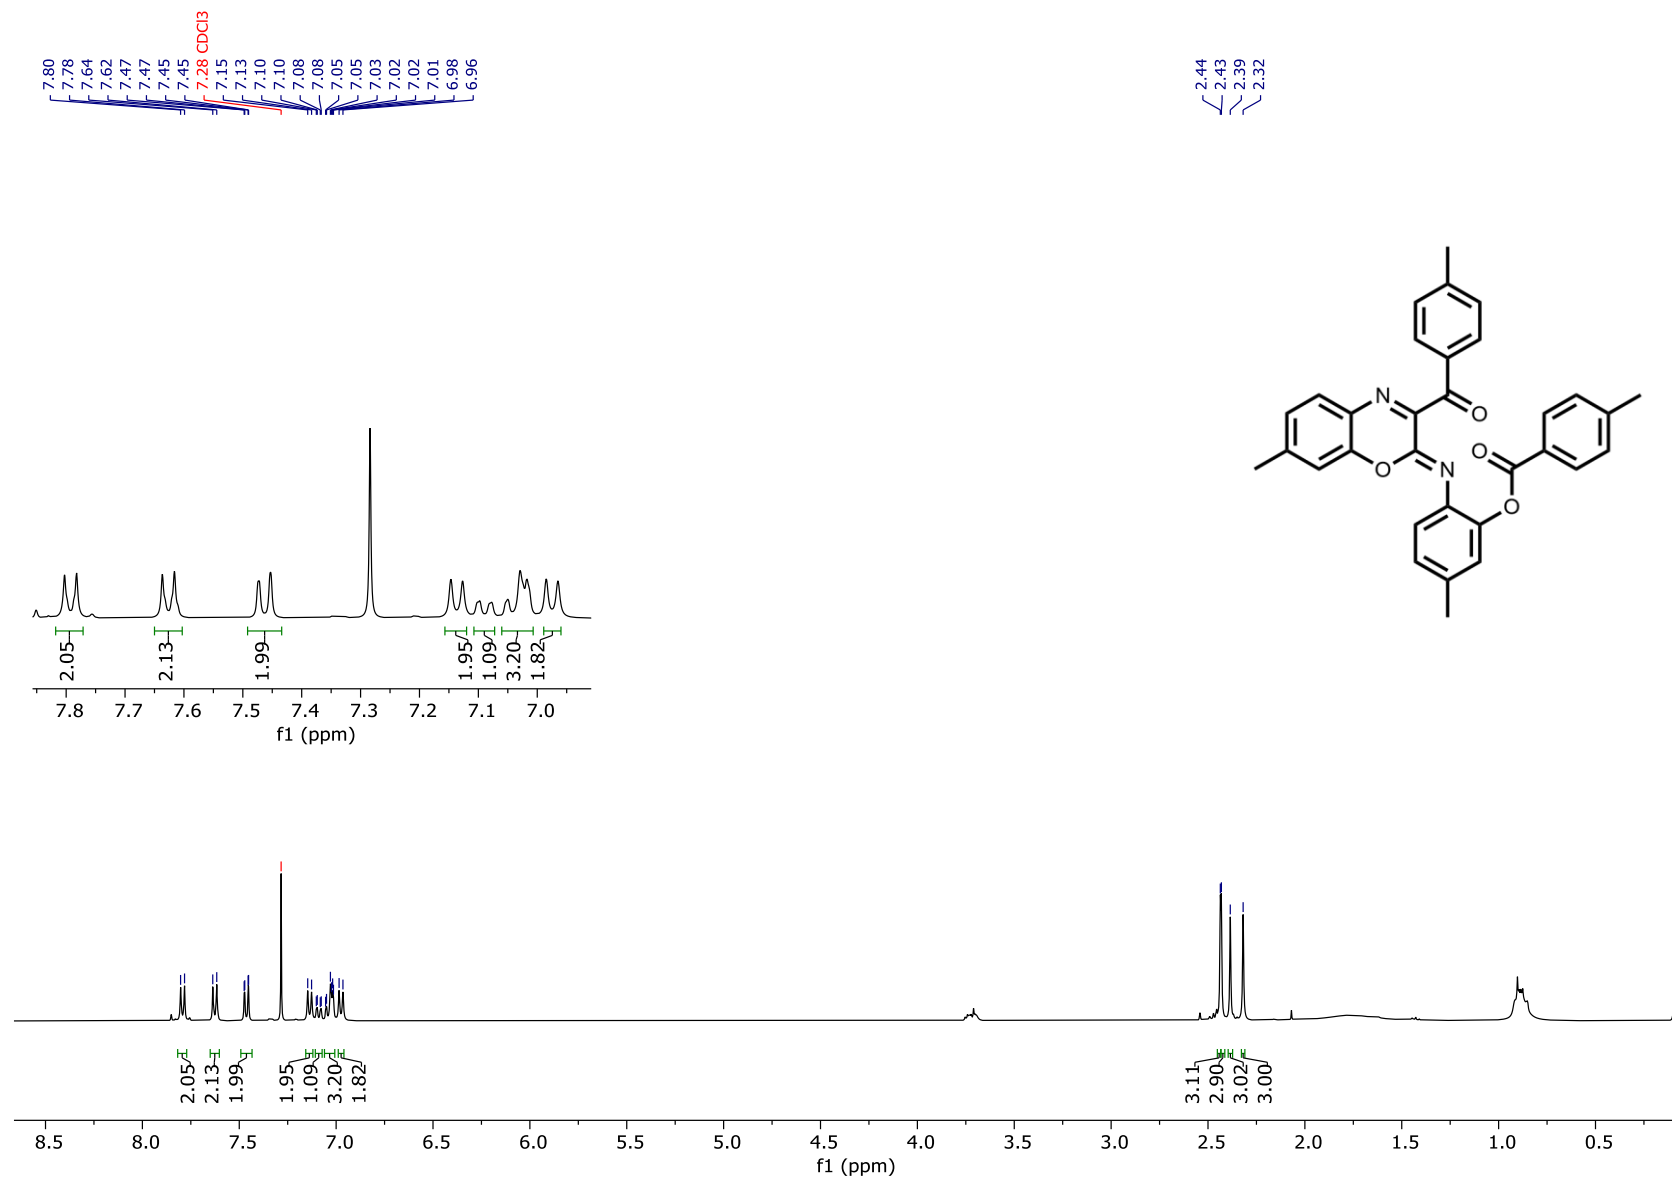

Figure S57. <sup>1</sup>H NMR (400 MHz, CDCl<sub>3</sub>) (Z)-5-methyl-2-((7-methyl-3-(4-methylbenzoyl)-2H-benzo[b][1,4]oxazin-2-ylidene)amino)phenyl 4-methylbenzoate (2c).

# Supporting Information

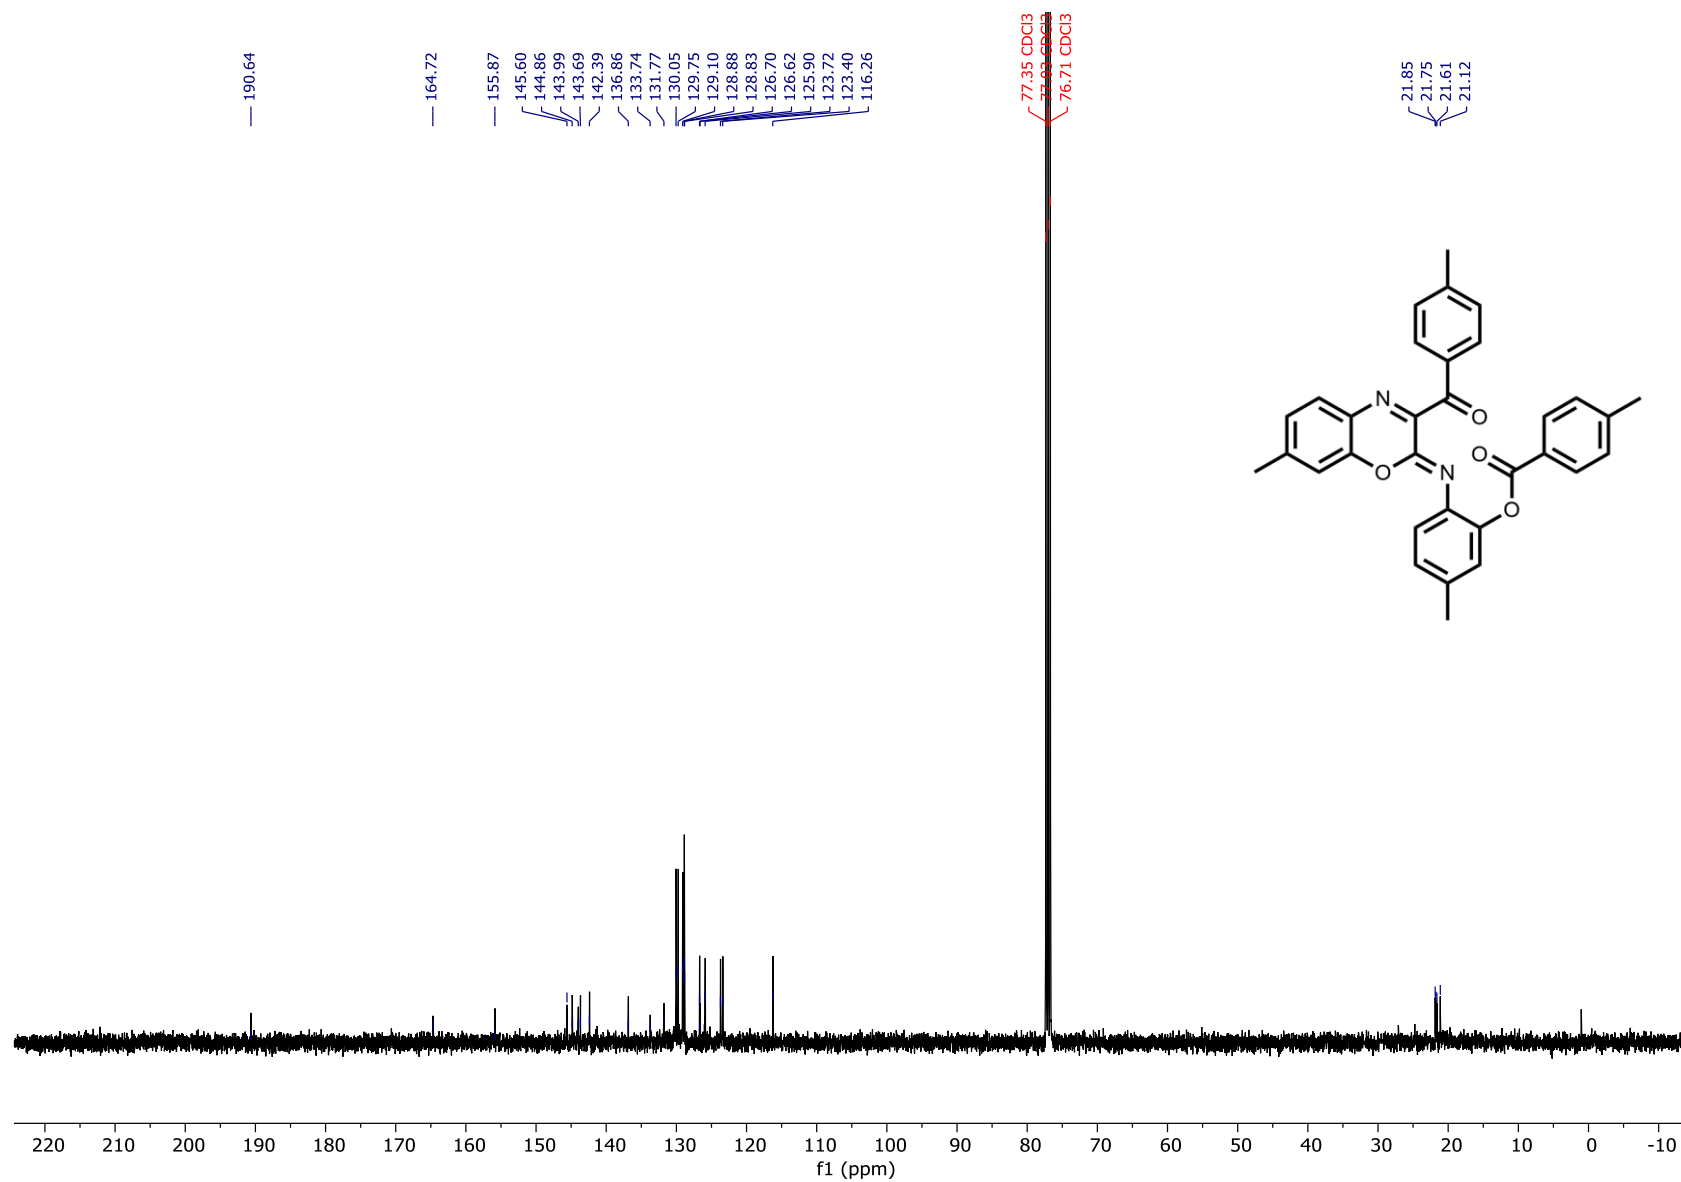

Figure S58. <sup>13</sup>C NMR (101 MHz, CDCl<sub>3</sub>) (Z)-5-methyl-2-((7-methyl-3-(4-methylbenzoyl)-2H-benzo[b][1,4]oxazin-2-ylidene)amino)phenyl 4-methylbenzoate (2c).

## Supporting Information

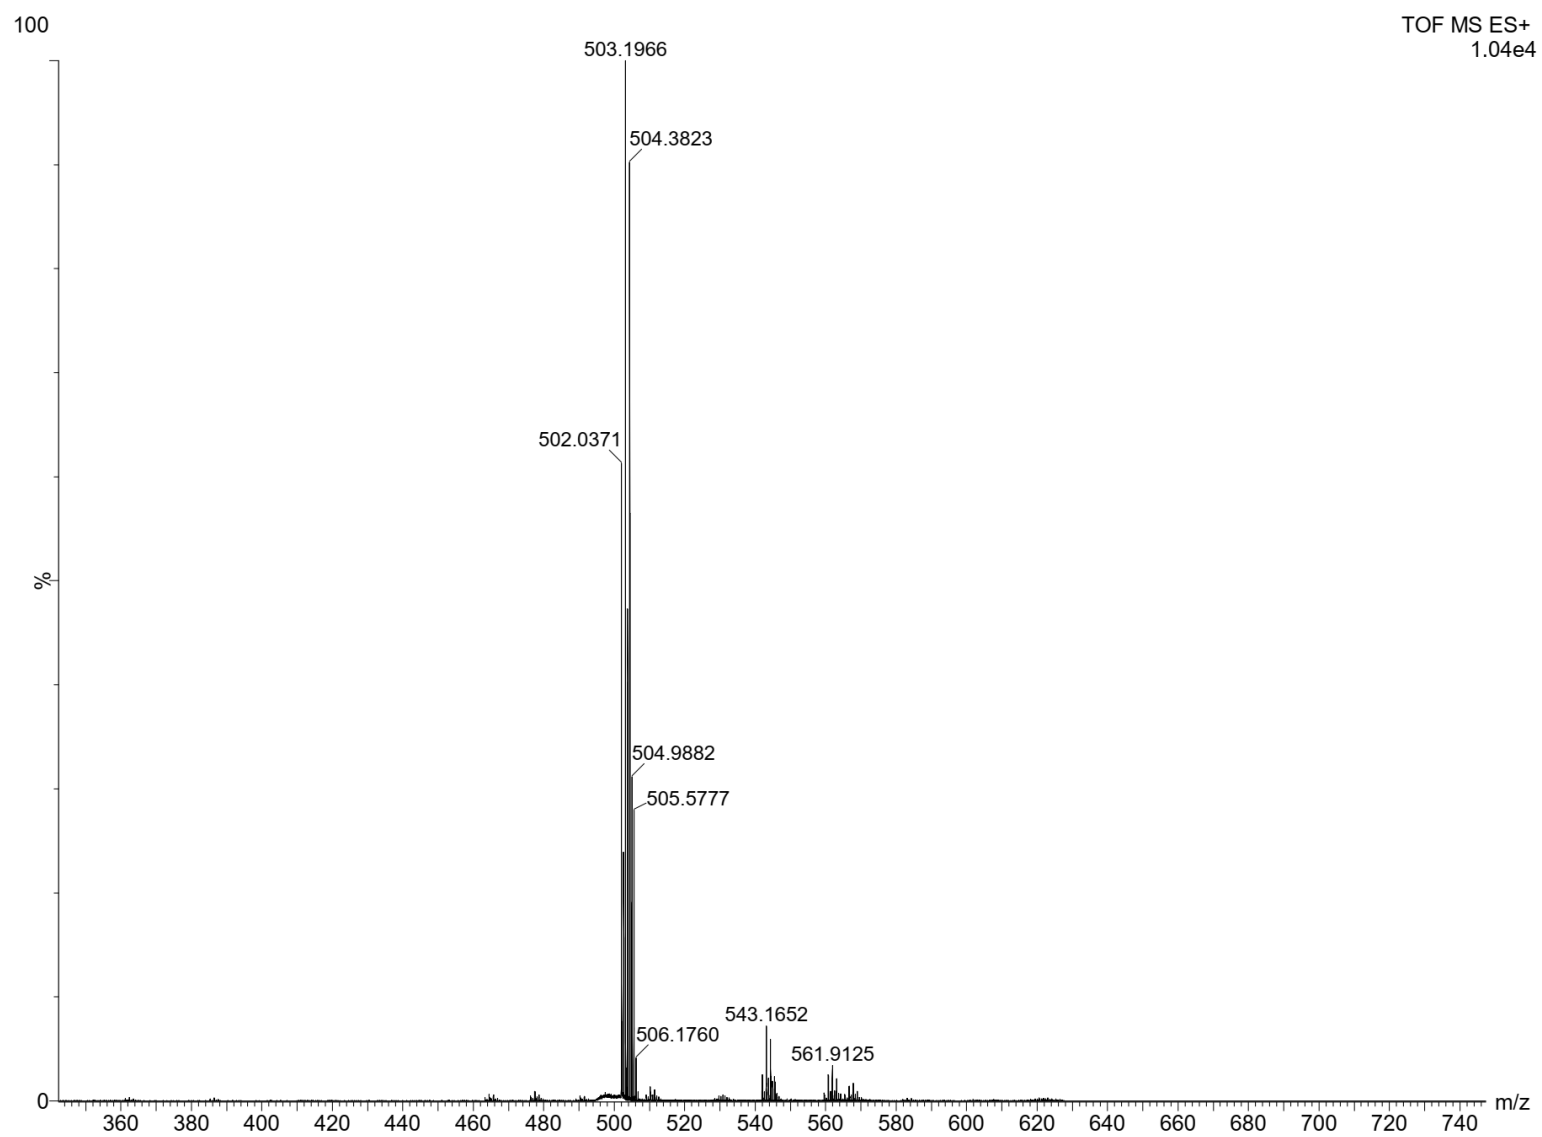

**Figure S59.** HRMS-ESI (Z)-5-methyl-2-((7-methyl-3-(4-methylbenzoyl)-2H-benzo[b][1,4]oxazin-2-ylidene)amino)phenyl 4-methylbenzoate (2c).

# Supporting Information

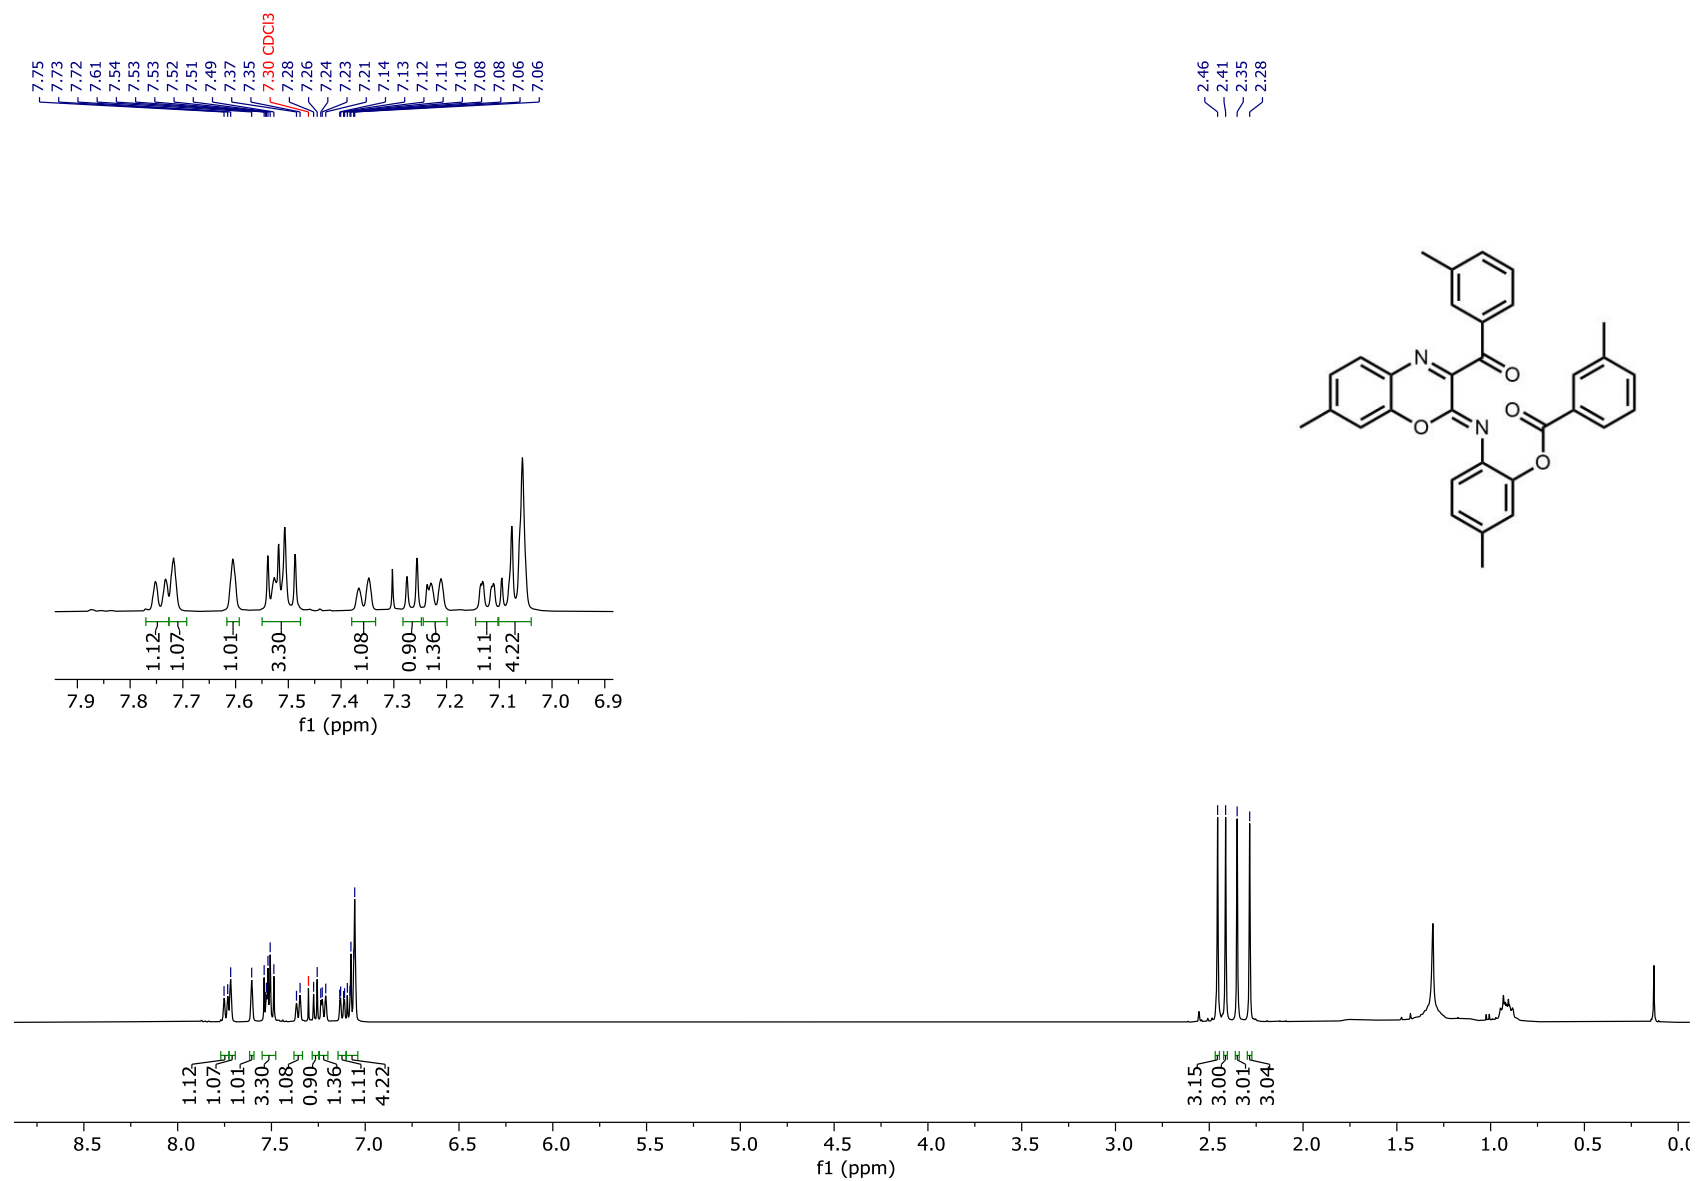

Figure S60. <sup>1</sup>H NMR (400 MHz, CDCl<sub>3</sub>) (Z)-5-methyl-2-((7-methyl-3-(3-methylbenzoyl)-2H-benzo[b][1,4]oxazin-2-ylidene)amino)phenyl 3-methylbenzoate (2d).



# Supporting Information

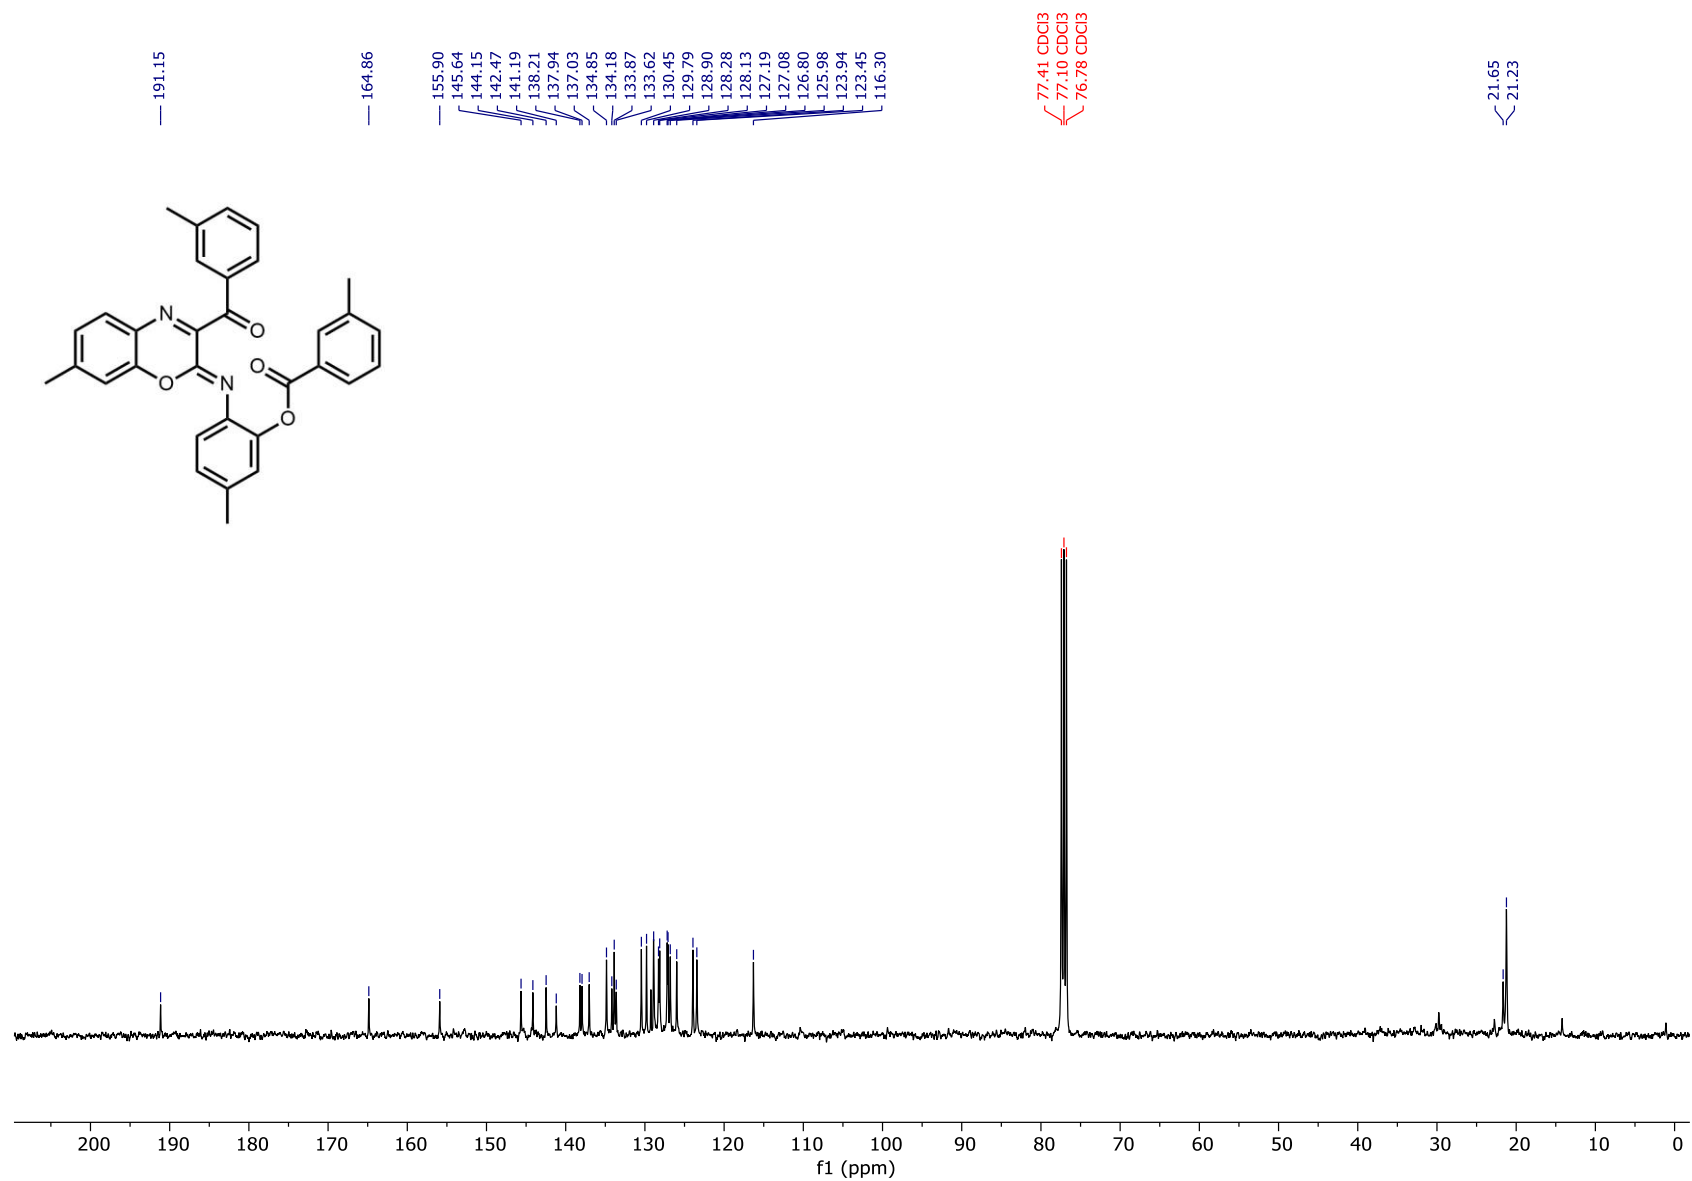

Figure S61. <sup>13</sup>C NMR (101 MHz, CDCl<sub>3</sub>) (Z)-5-methyl-2-((7-methyl-3-(3-methylbenzoyl)-2H-benzo[b][1,4]oxazin-2-ylidene)amino)phenyl 3-methylbenzoate (2d).

## Supporting Information

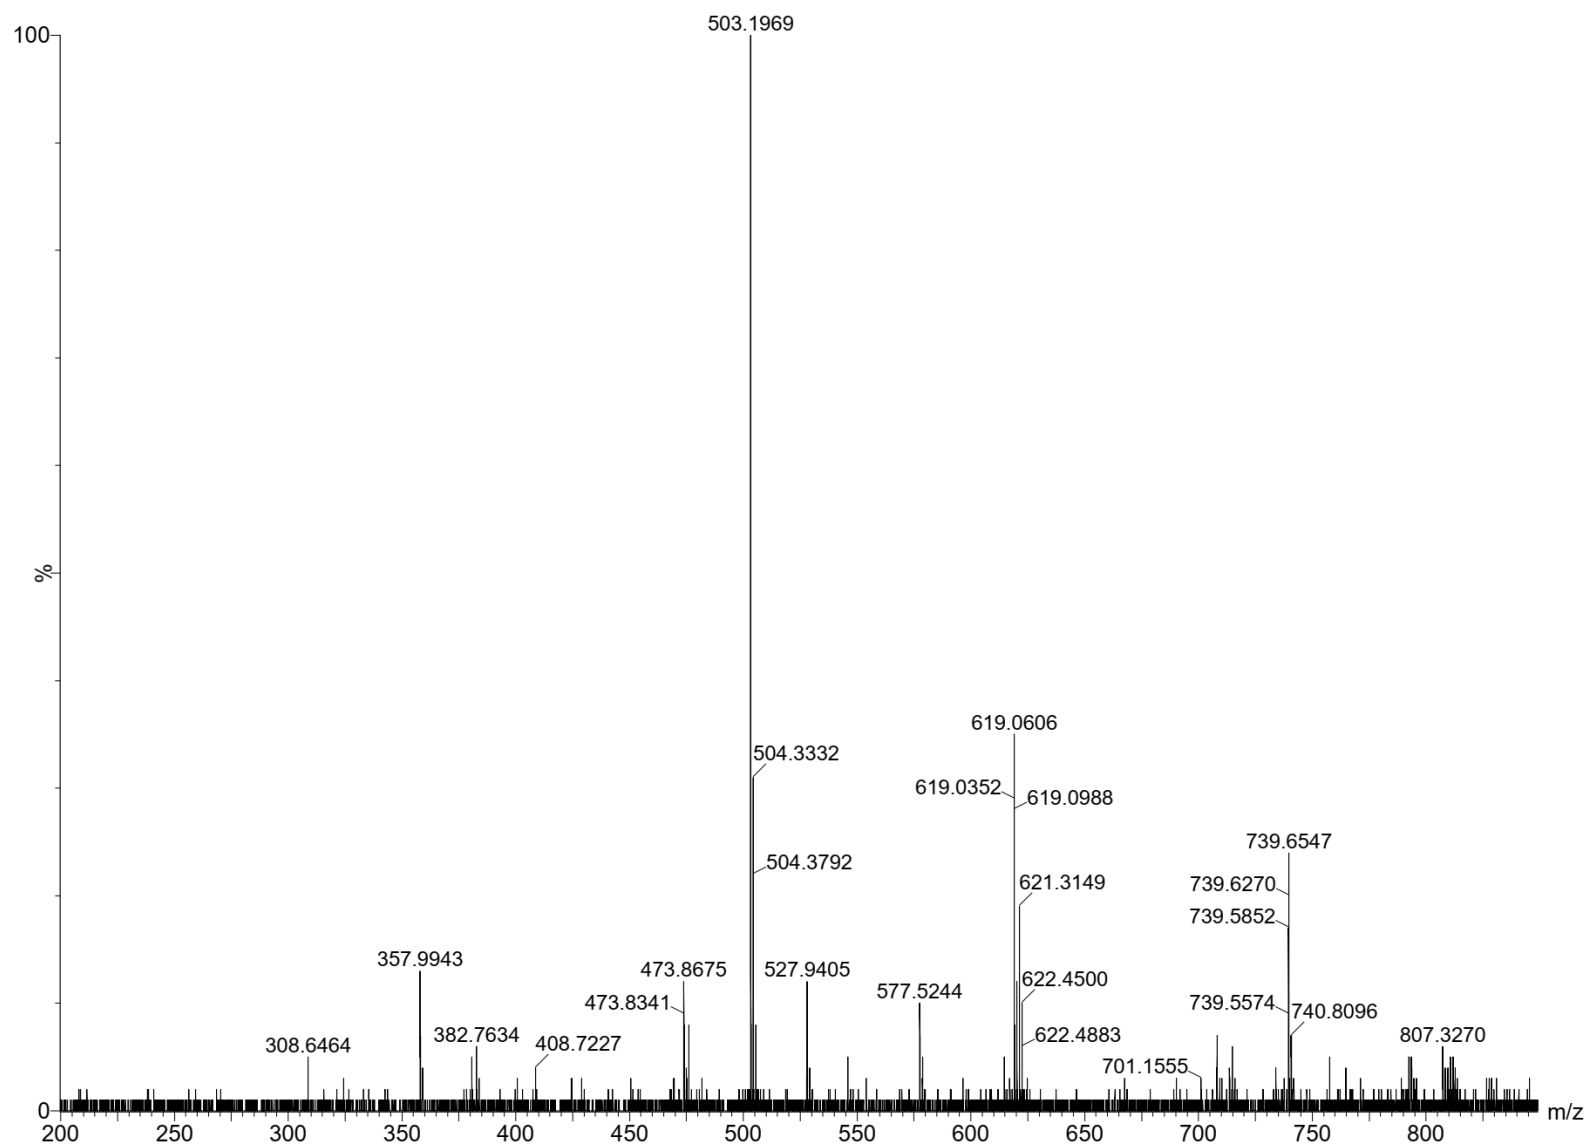

Figure S62. HRMS-ESI (Z)-5-methyl-2-((7-methyl-3-(3-methylbenzoyl)-2H-benzo[b][1,4]oxazin-2-ylidene)amino)phenyl 3-methylbenzoate (2d).

# Supporting Information

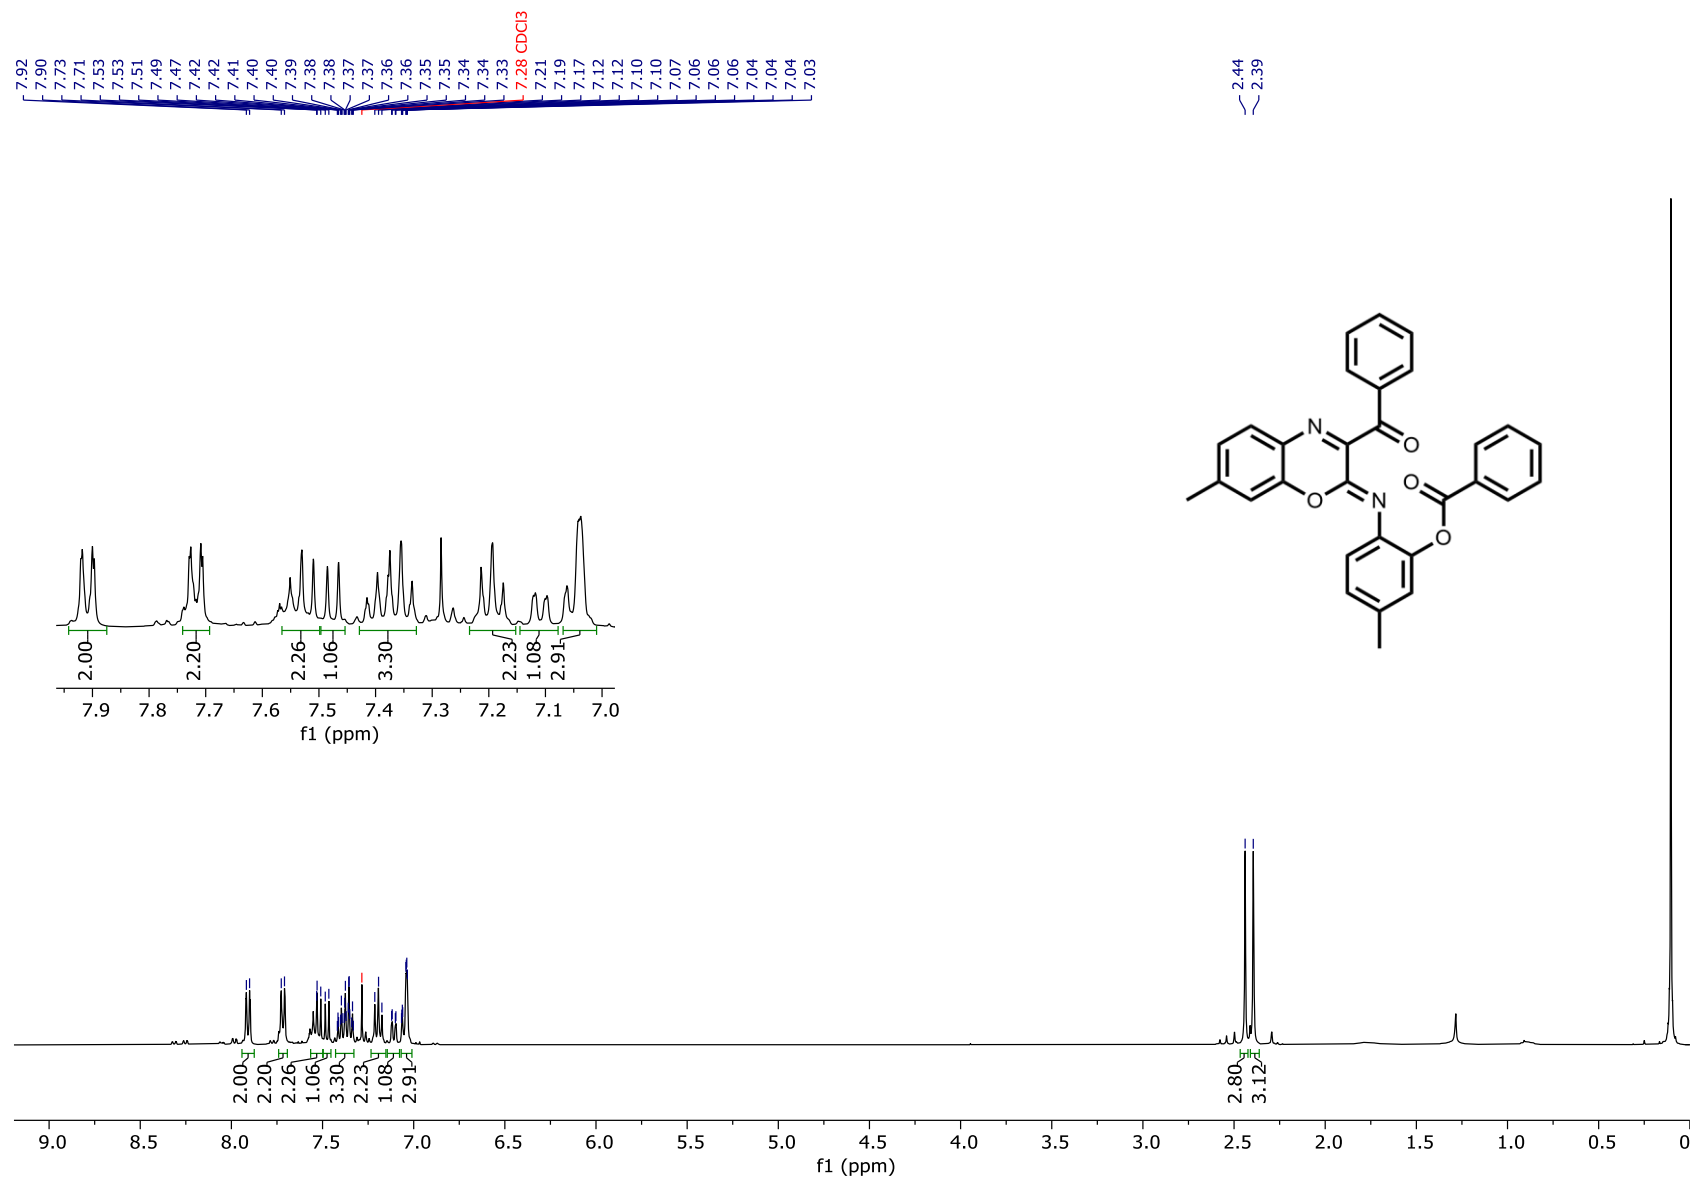

Figure S63. <sup>1</sup>H NMR (400 MHz, CDCl<sub>3</sub>) (Z)-2-((3-benzoyl-7-methyl-2H-benzo[b][1,4]oxazin-2-ylidene)amino)-5-methylphenyl benzoate (2e).

# Supporting Information

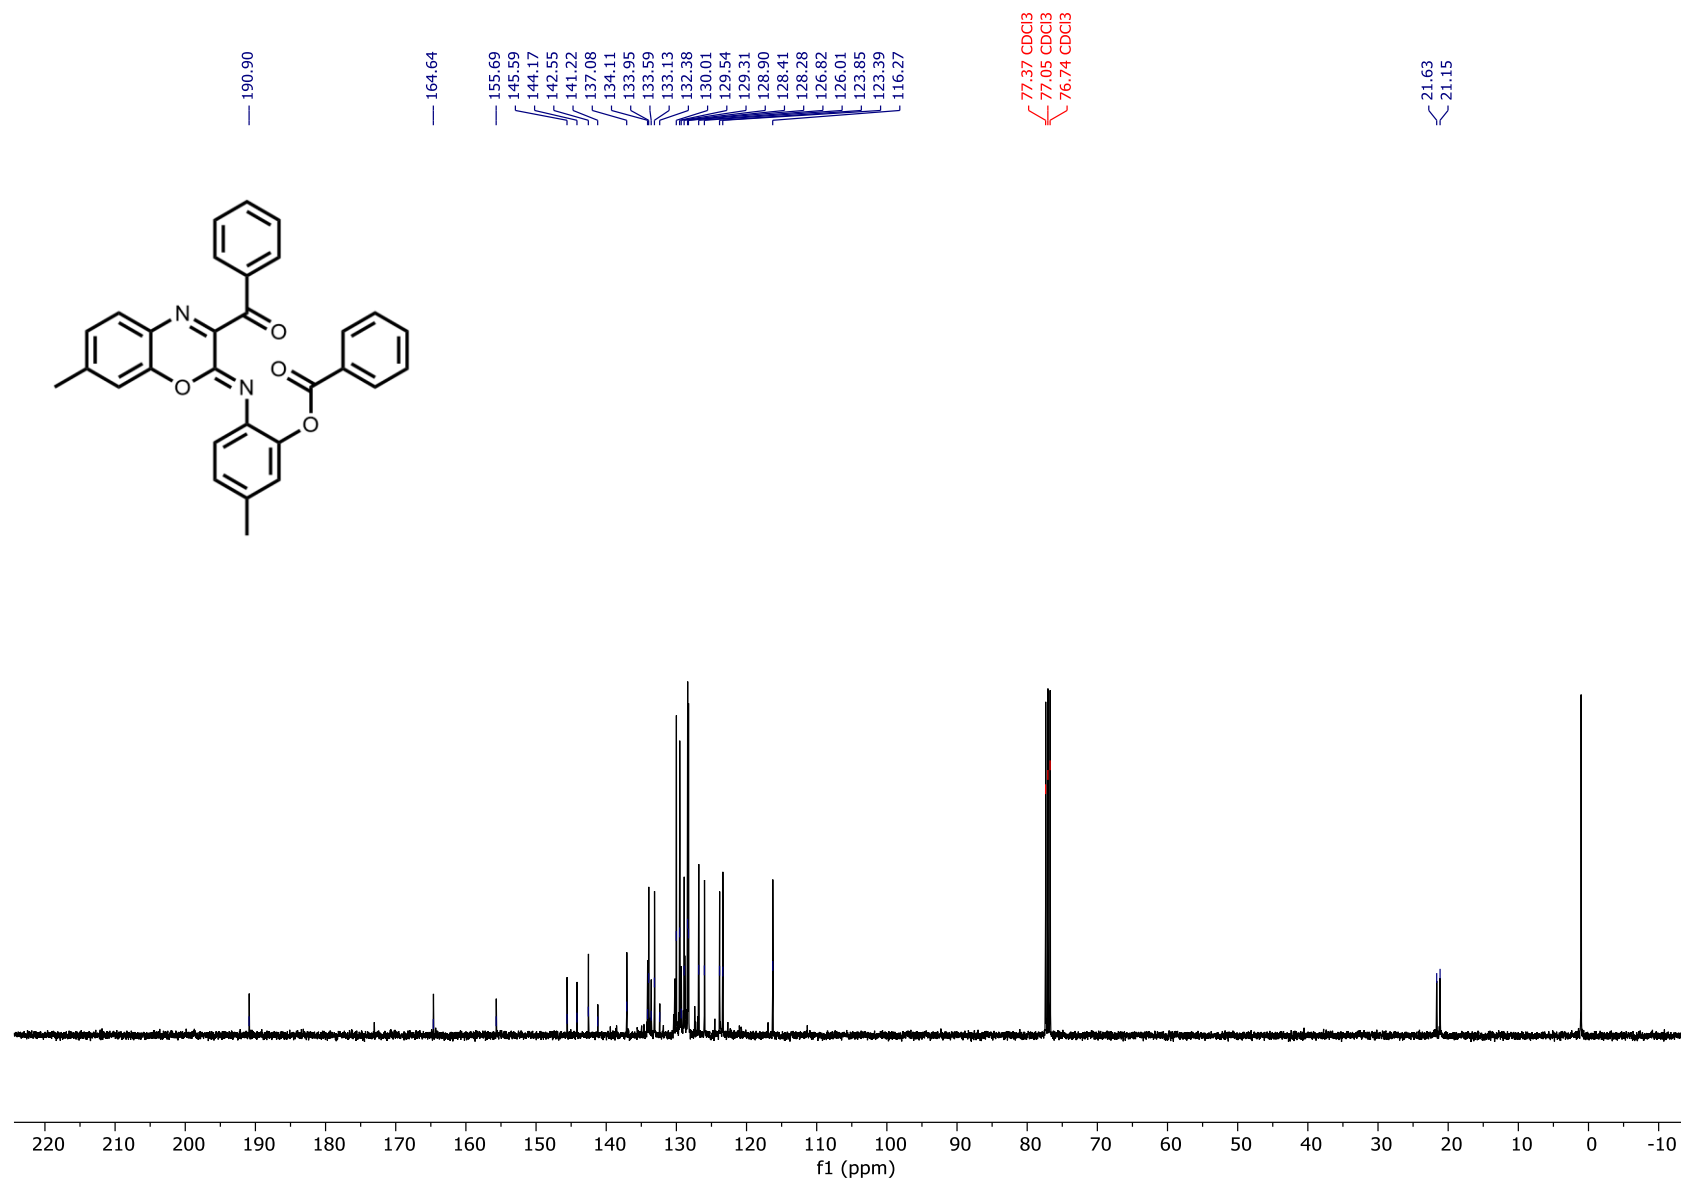

Figure S64. <sup>13</sup>C NMR (101 MHz, CDCl<sub>3</sub>) (Z)-2-((3-benzoyl-7-methyl-2H-benzo[b][1,4]oxazin-2-ylidene)amino)-5-methylphenyl benzoate (2e).

## Supporting Information

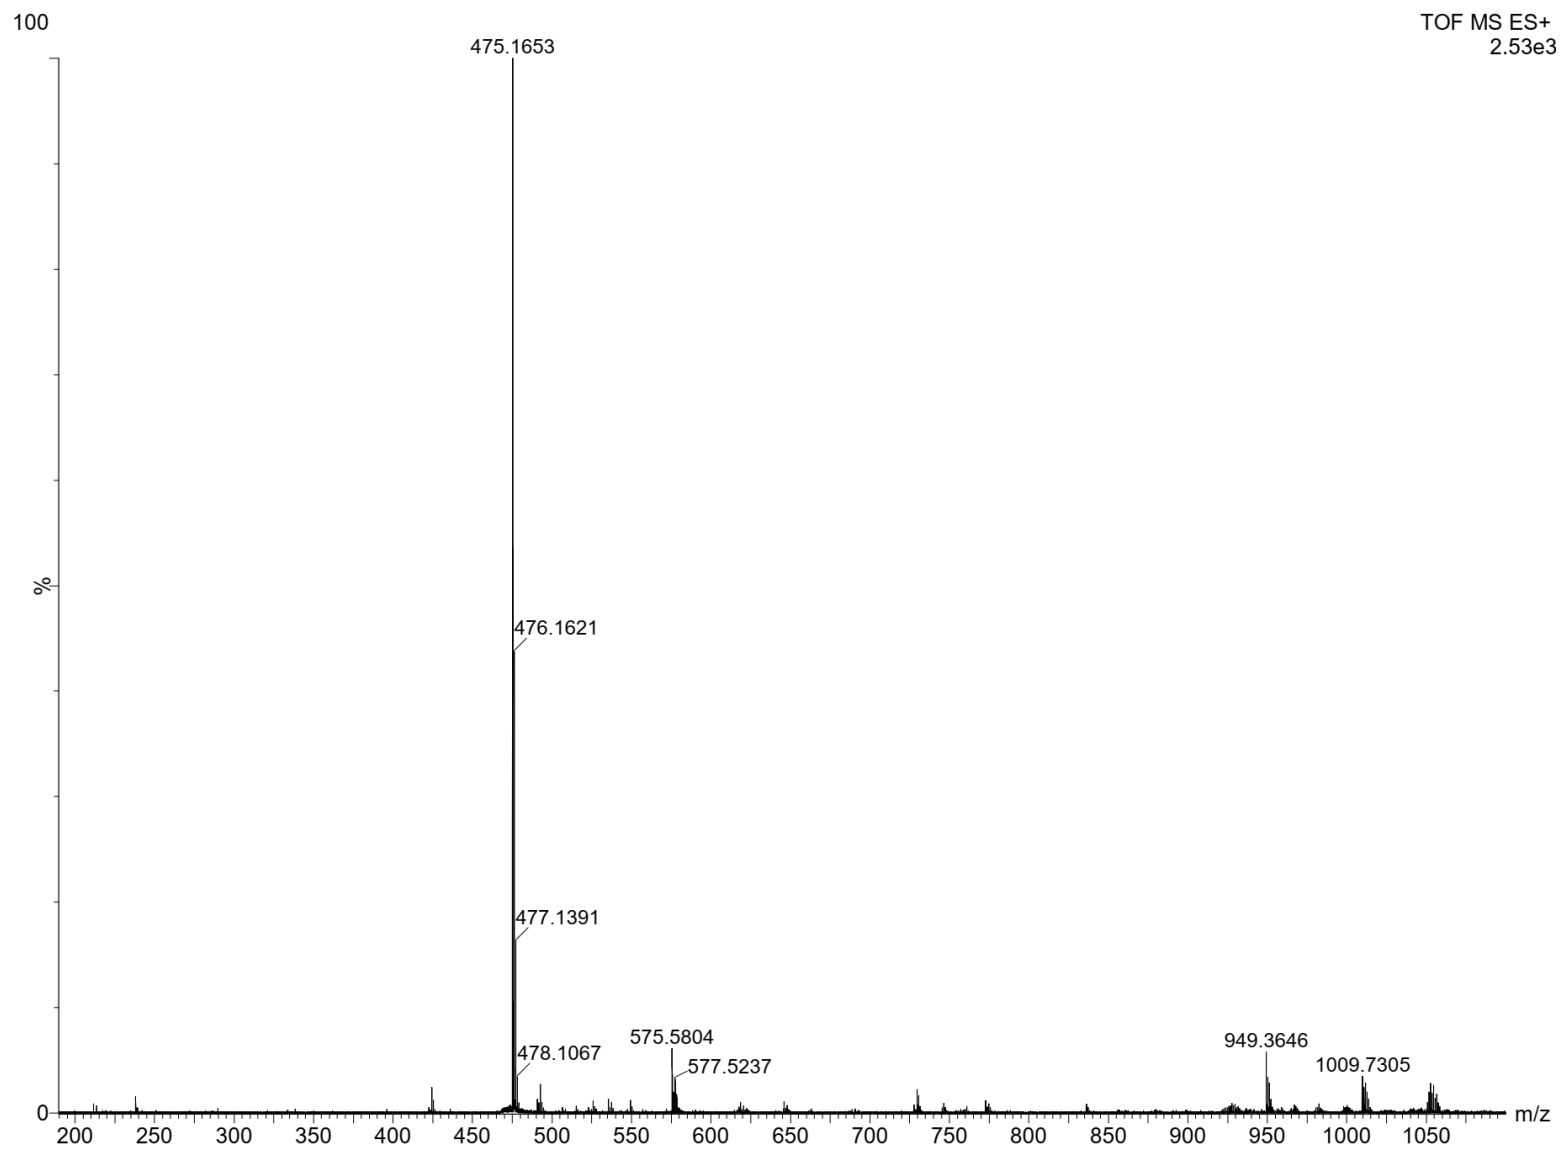

Figure S65. HRMS-ESI (Z)-2-((3-benzoyl-7-methyl-2H-benzo[b][1,4]oxazin-2-ylidene)amino)-5-methylphenyl benzoate (2e).

# Supporting Information

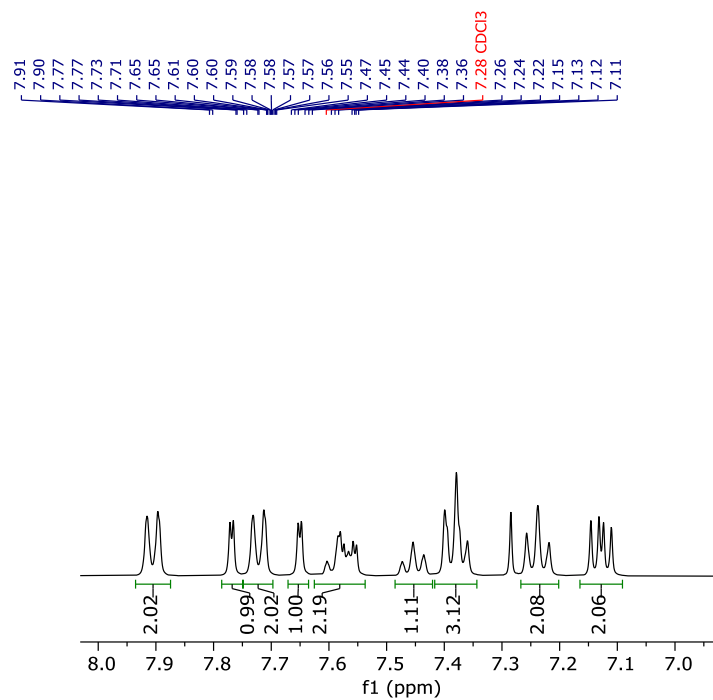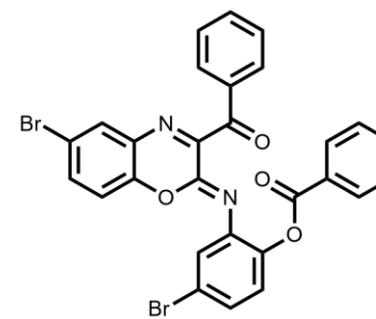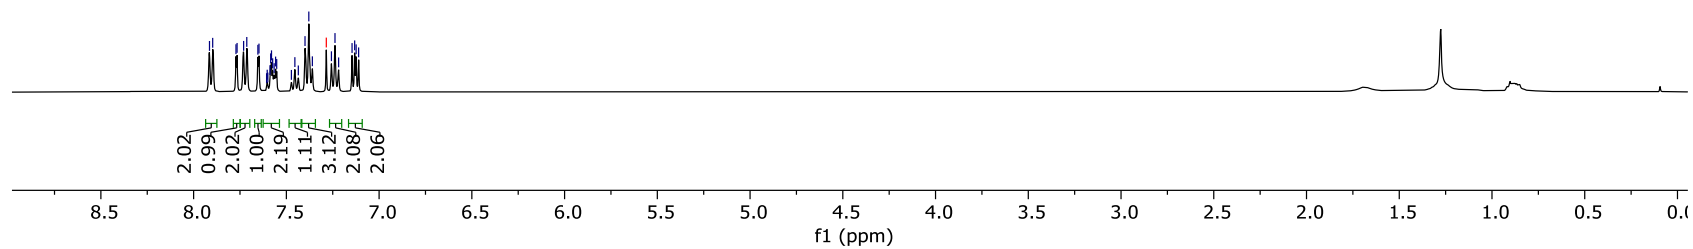

Figure S66. <sup>1</sup>H NMR (400 MHz, CDCl<sub>3</sub>) (Z)-2-((3-benzoyl-6-bromo-2H-benzo[b][1,4]oxazin-2-ylidene)amino)-4-bromophenyl benzoate (2f).

# Supporting Information

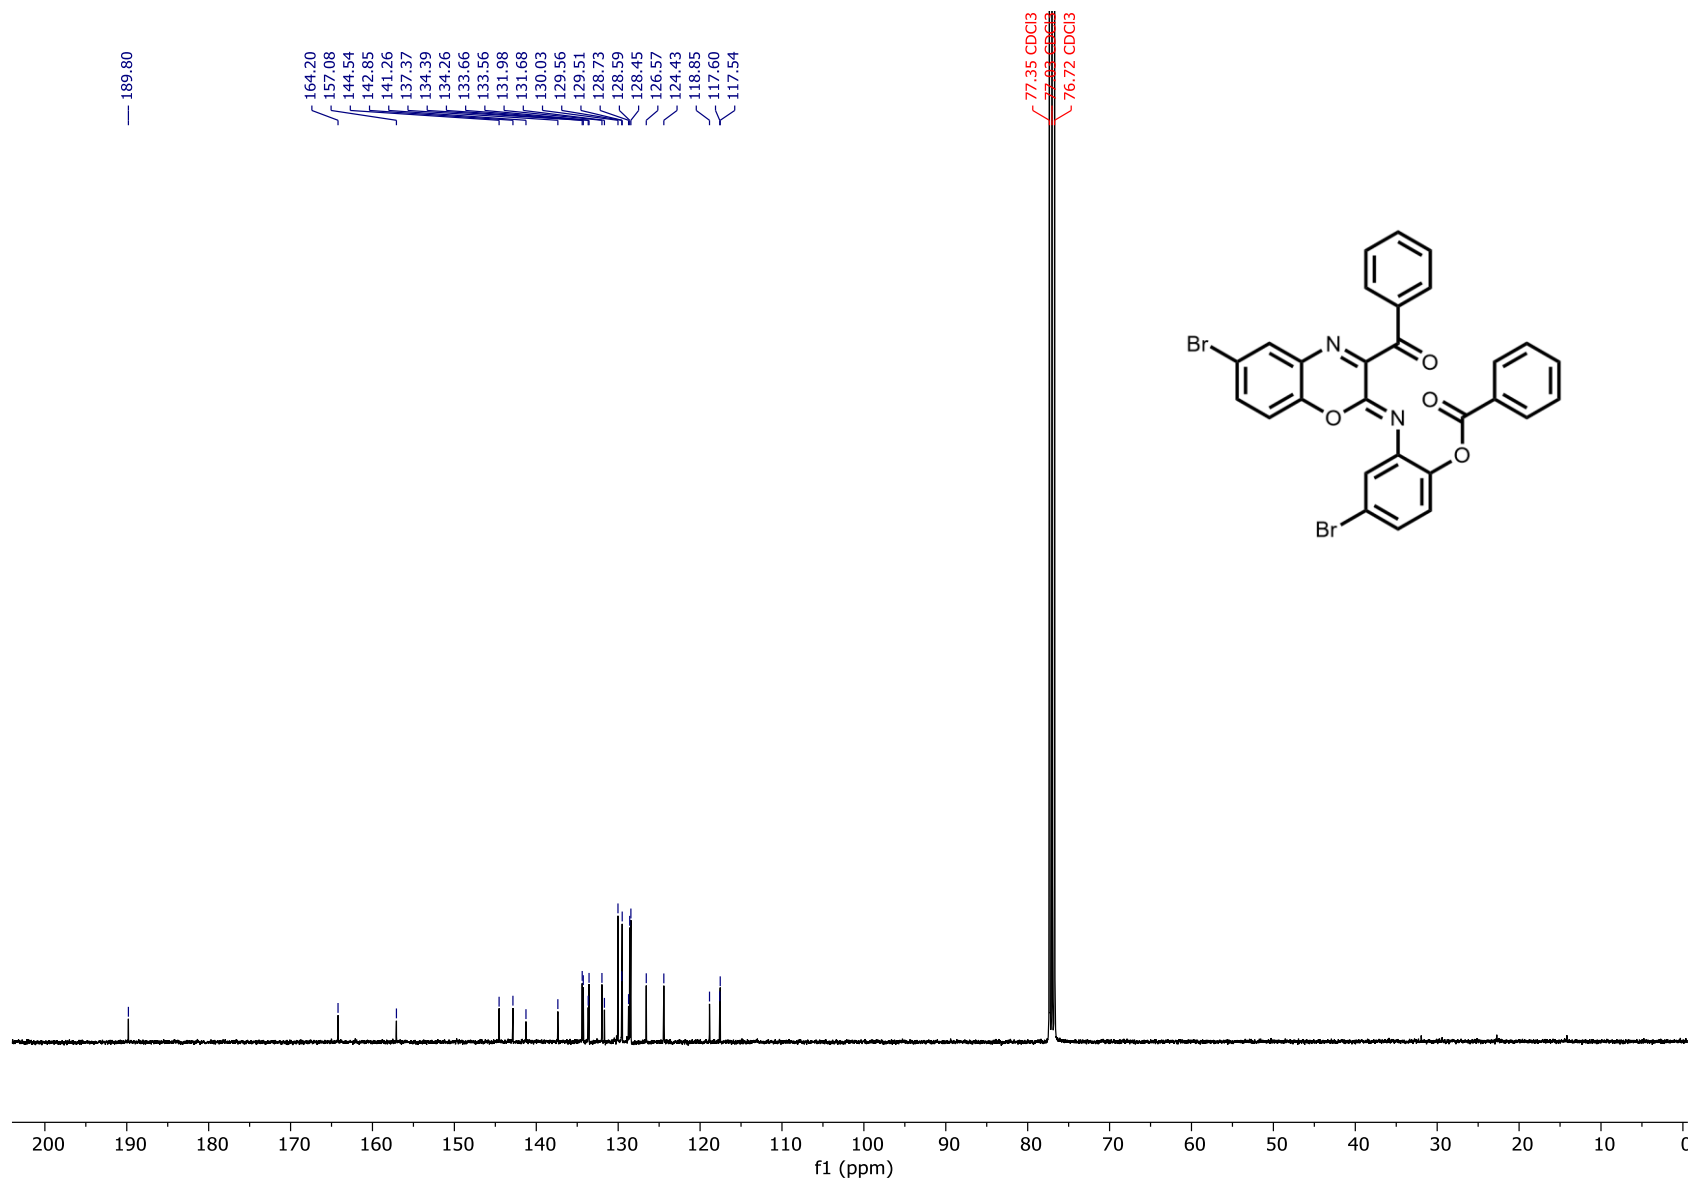

Figure S67.  $^{13}\text{C}$  NMR (101 MHz,  $\text{CDCl}_3$ ) (Z)-2-((3-benzoyl-6-bromo-2H-benzo[b][1,4]oxazin-2-ylidene)amino)-4-bromophenyl benzoate (2f).

# Supporting Information

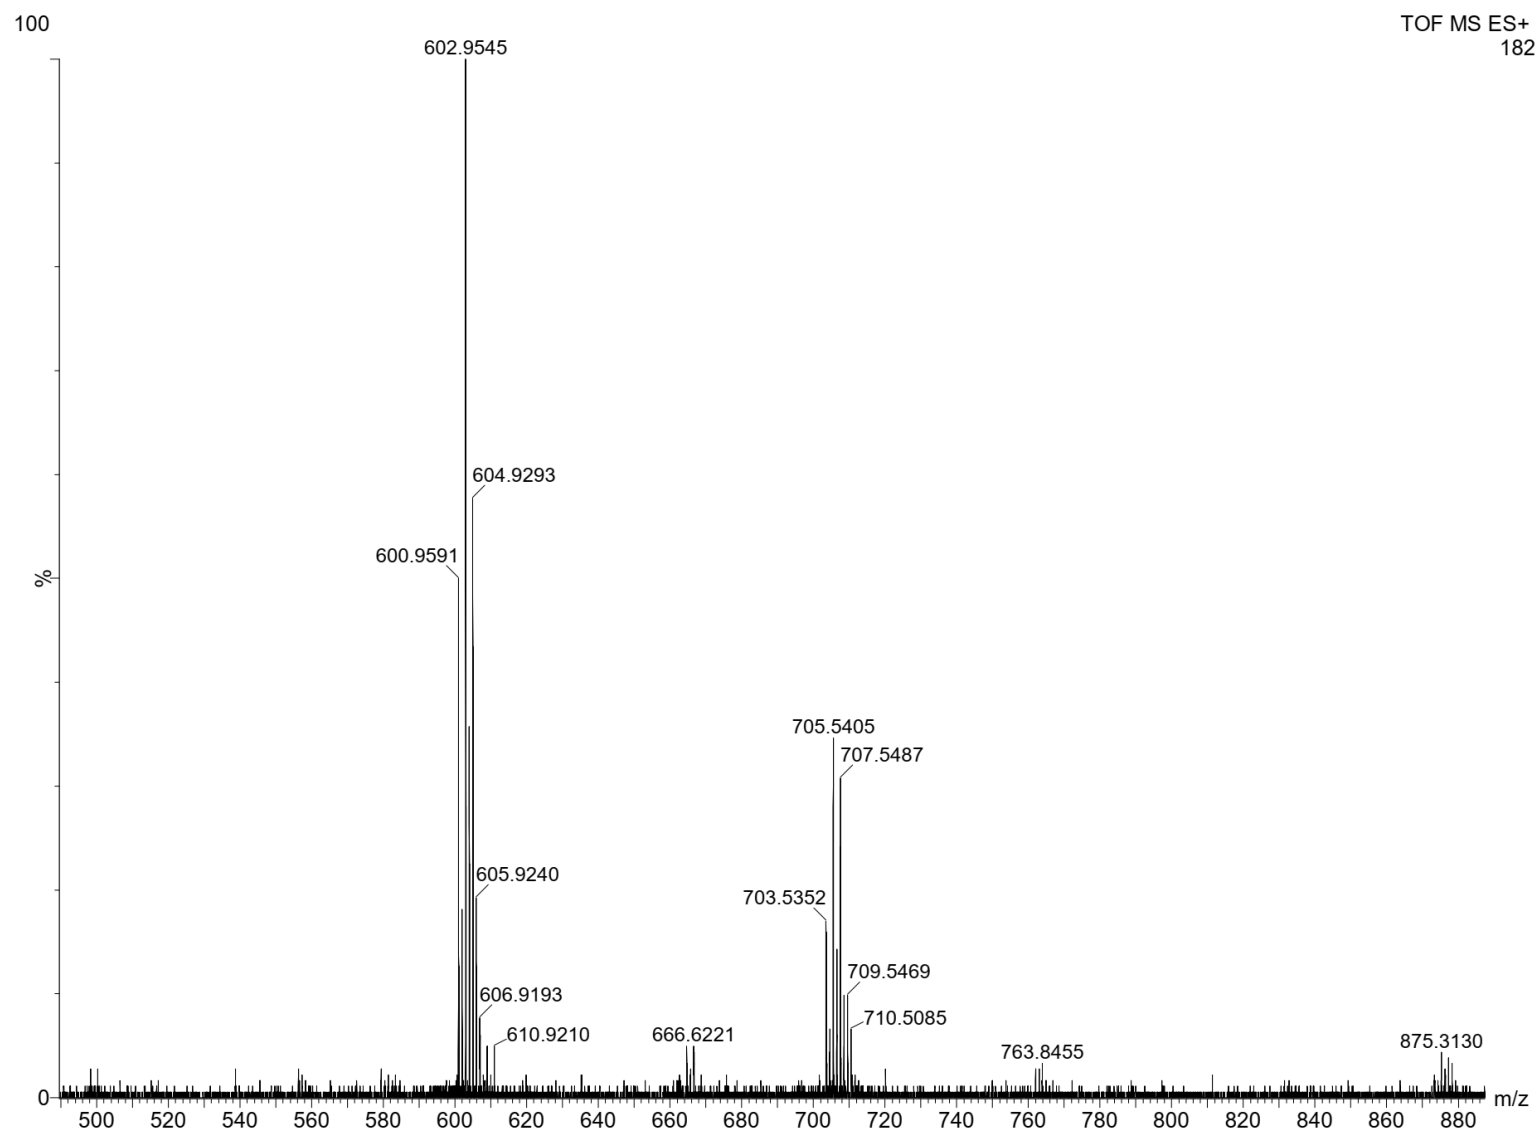

Figure S68. HRMS-ESI (Z)-2-((3-benzoyl-6-bromo-2H-benzo[b][1,4]oxazin-2-ylidene)amino)-4-bromophenyl benzoate (2f).



# Supporting Information

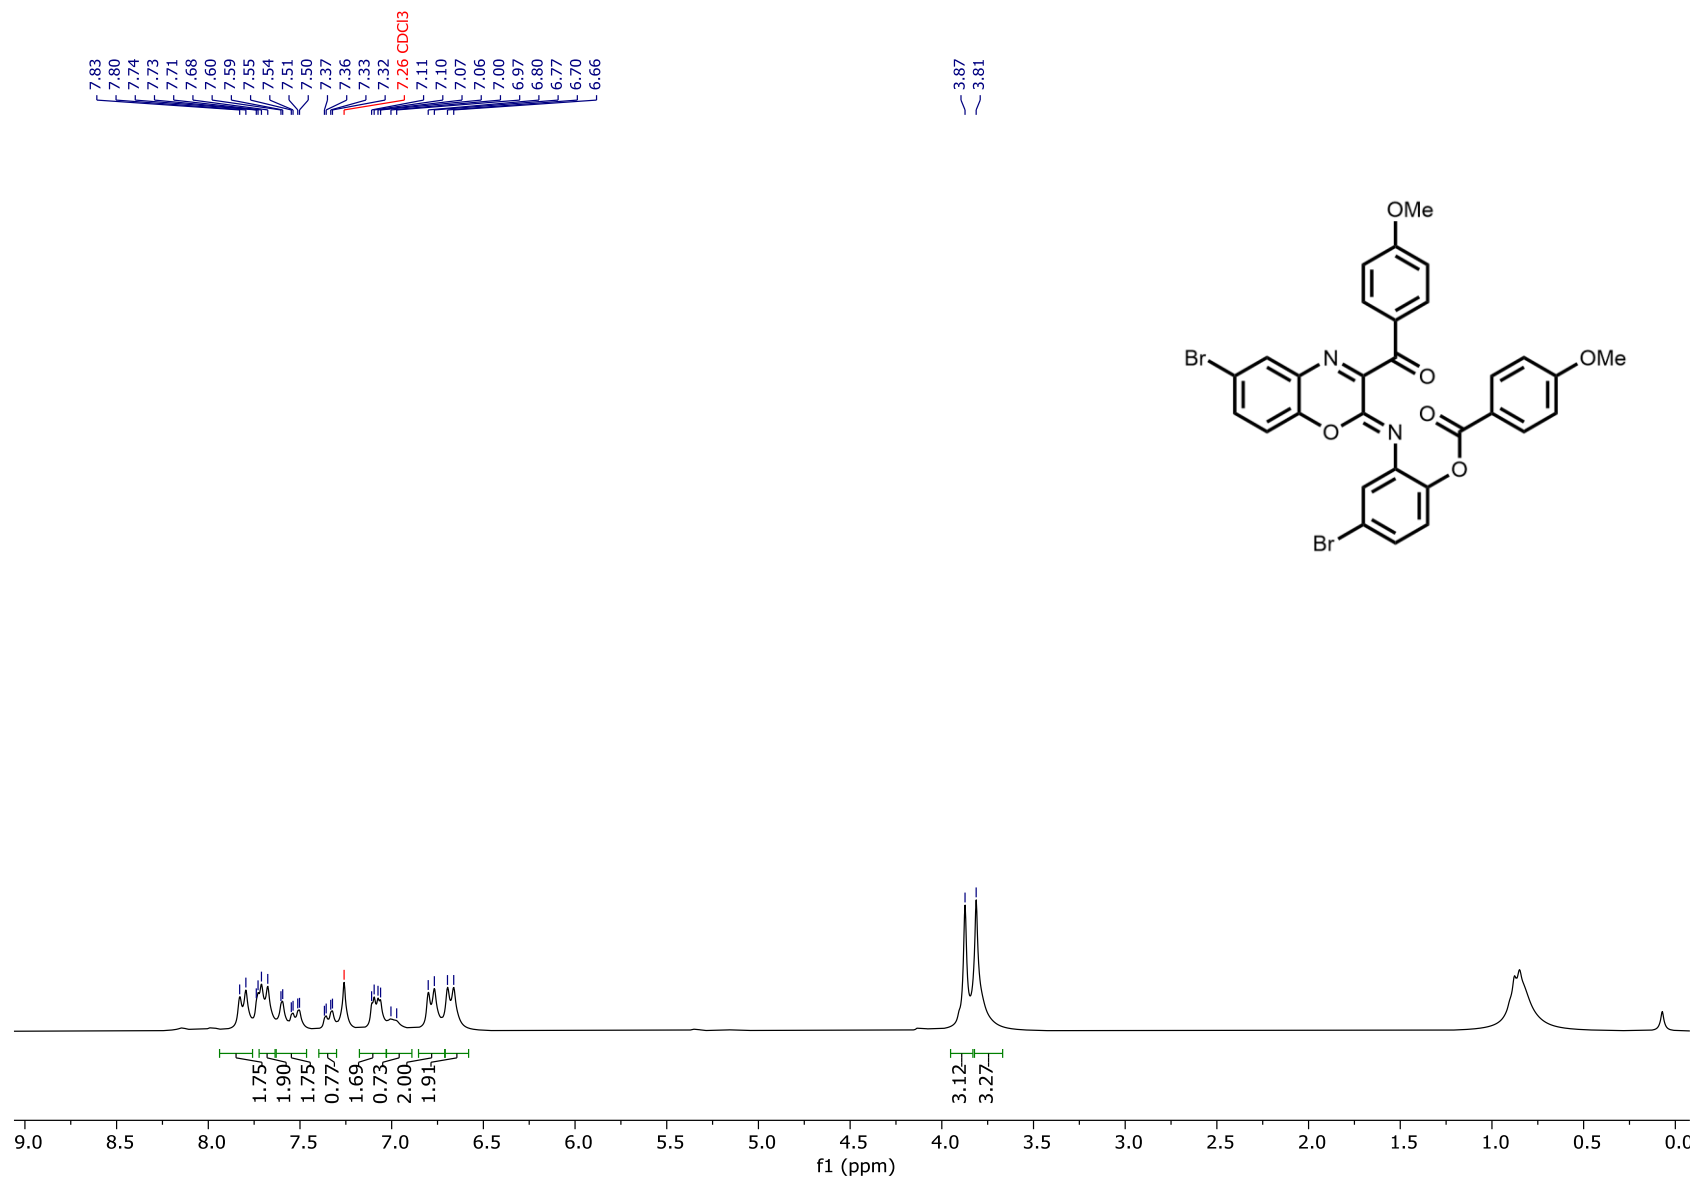

Figure S69. <sup>1</sup>H NMR (250 MHz, CDCl<sub>3</sub>) (Z)-4-bromo-2-((6-bromo-3-(4-methoxybenzoyl)-2H-benzo[b][1,4]oxazin-2-ylidene)amino)phenyl 4-methoxybenzoate (2g).

# Supporting Information

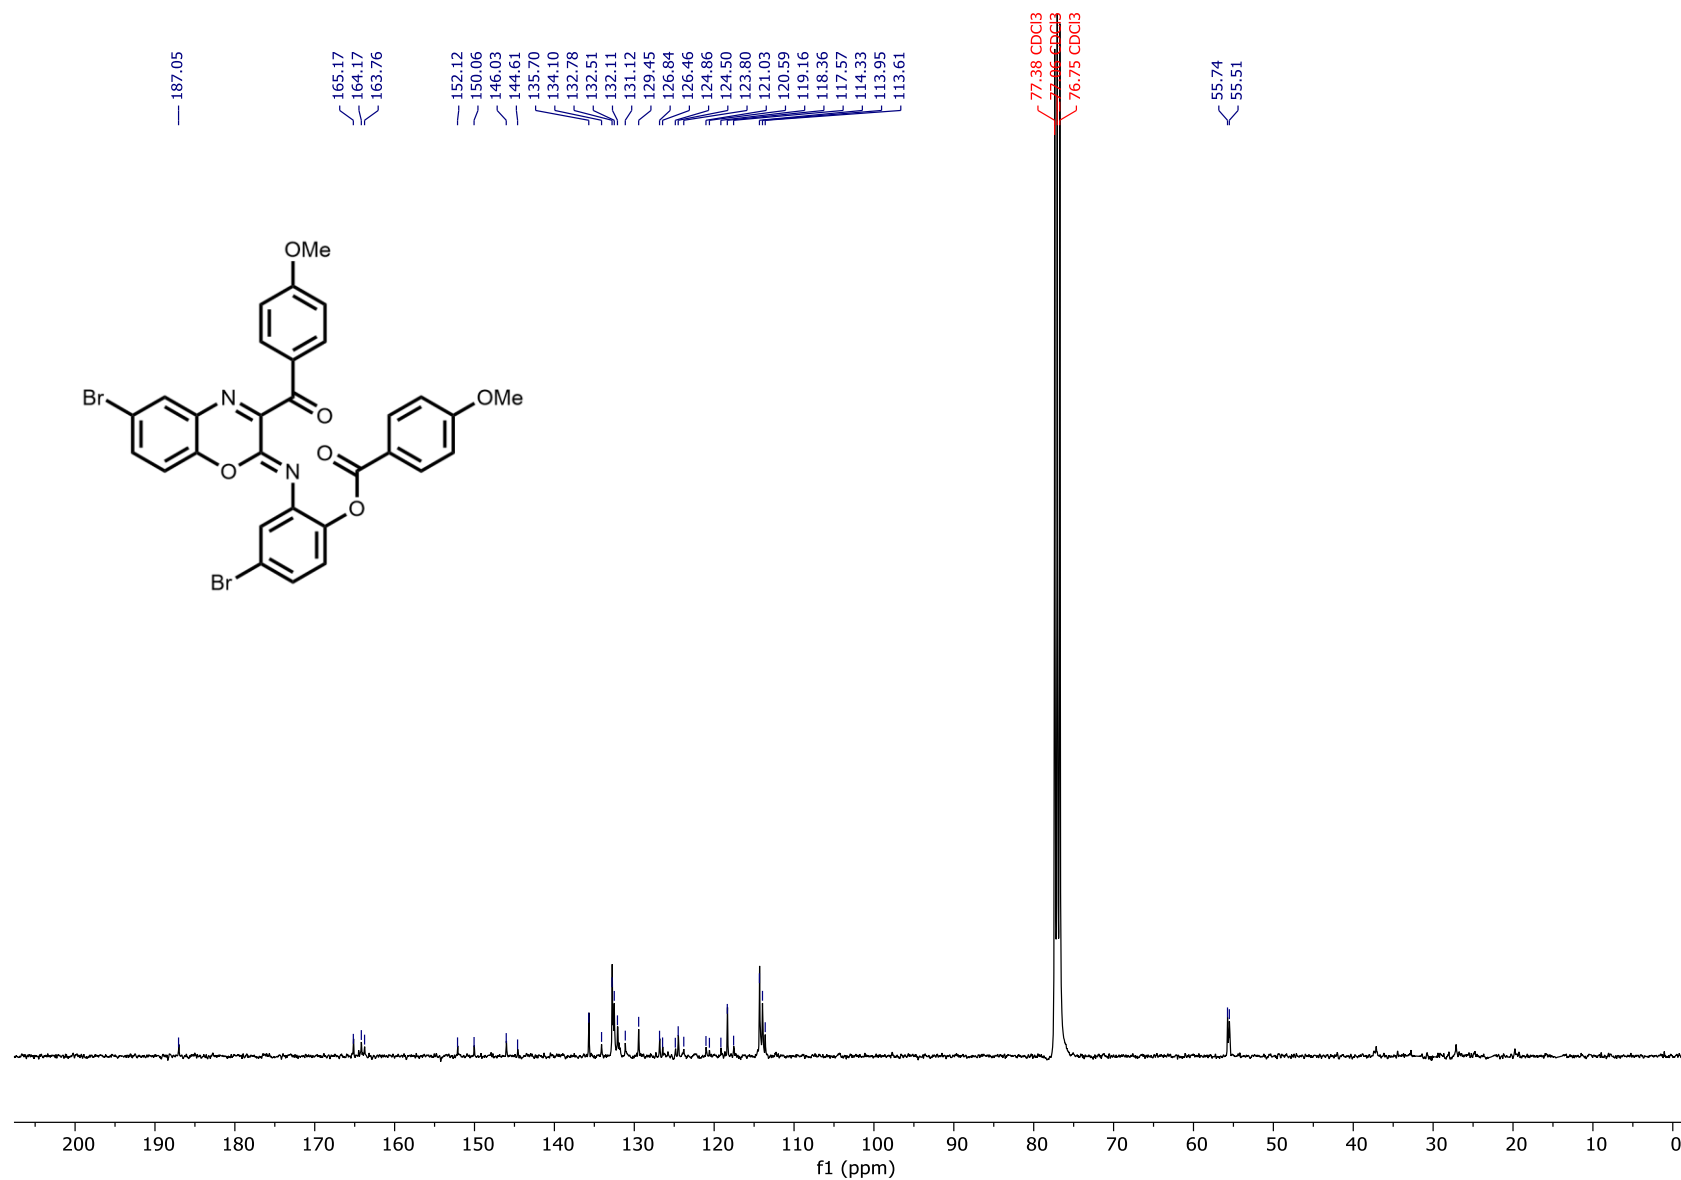

Figure S70. <sup>13</sup>C NMR (101 MHz, CDCl<sub>3</sub>) (Z)-4-bromo-2-((6-bromo-3-(4-methoxybenzoyl)-2H-benzo[b][1,4]oxazin-2-ylidene)amino)phenyl 4-methoxybenzoate (2g).

# Supporting Information

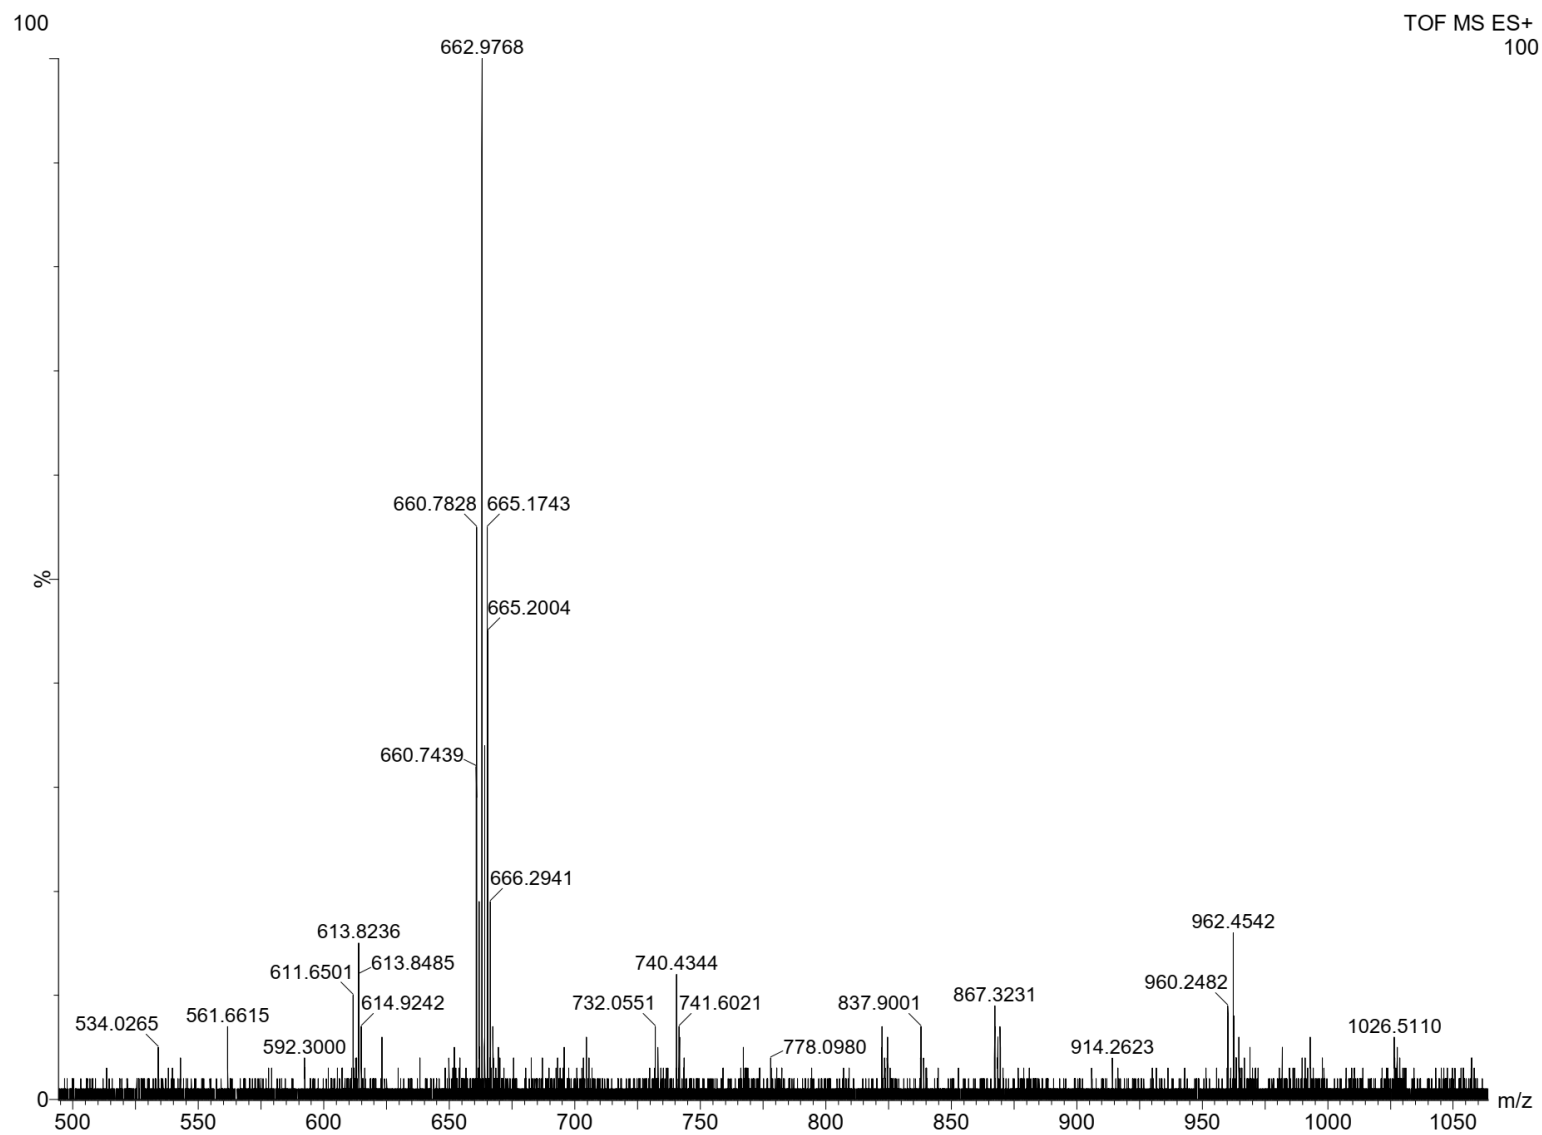

Figure S71. HRMS-ESI (Z)-4-bromo-2-((6-bromo-3-(4-methoxybenzoyl)-2H-benzo[b][1,4]oxazin-2-ylidene)amino)phenyl 4-methoxybenzoate (2g).

# Supporting Information

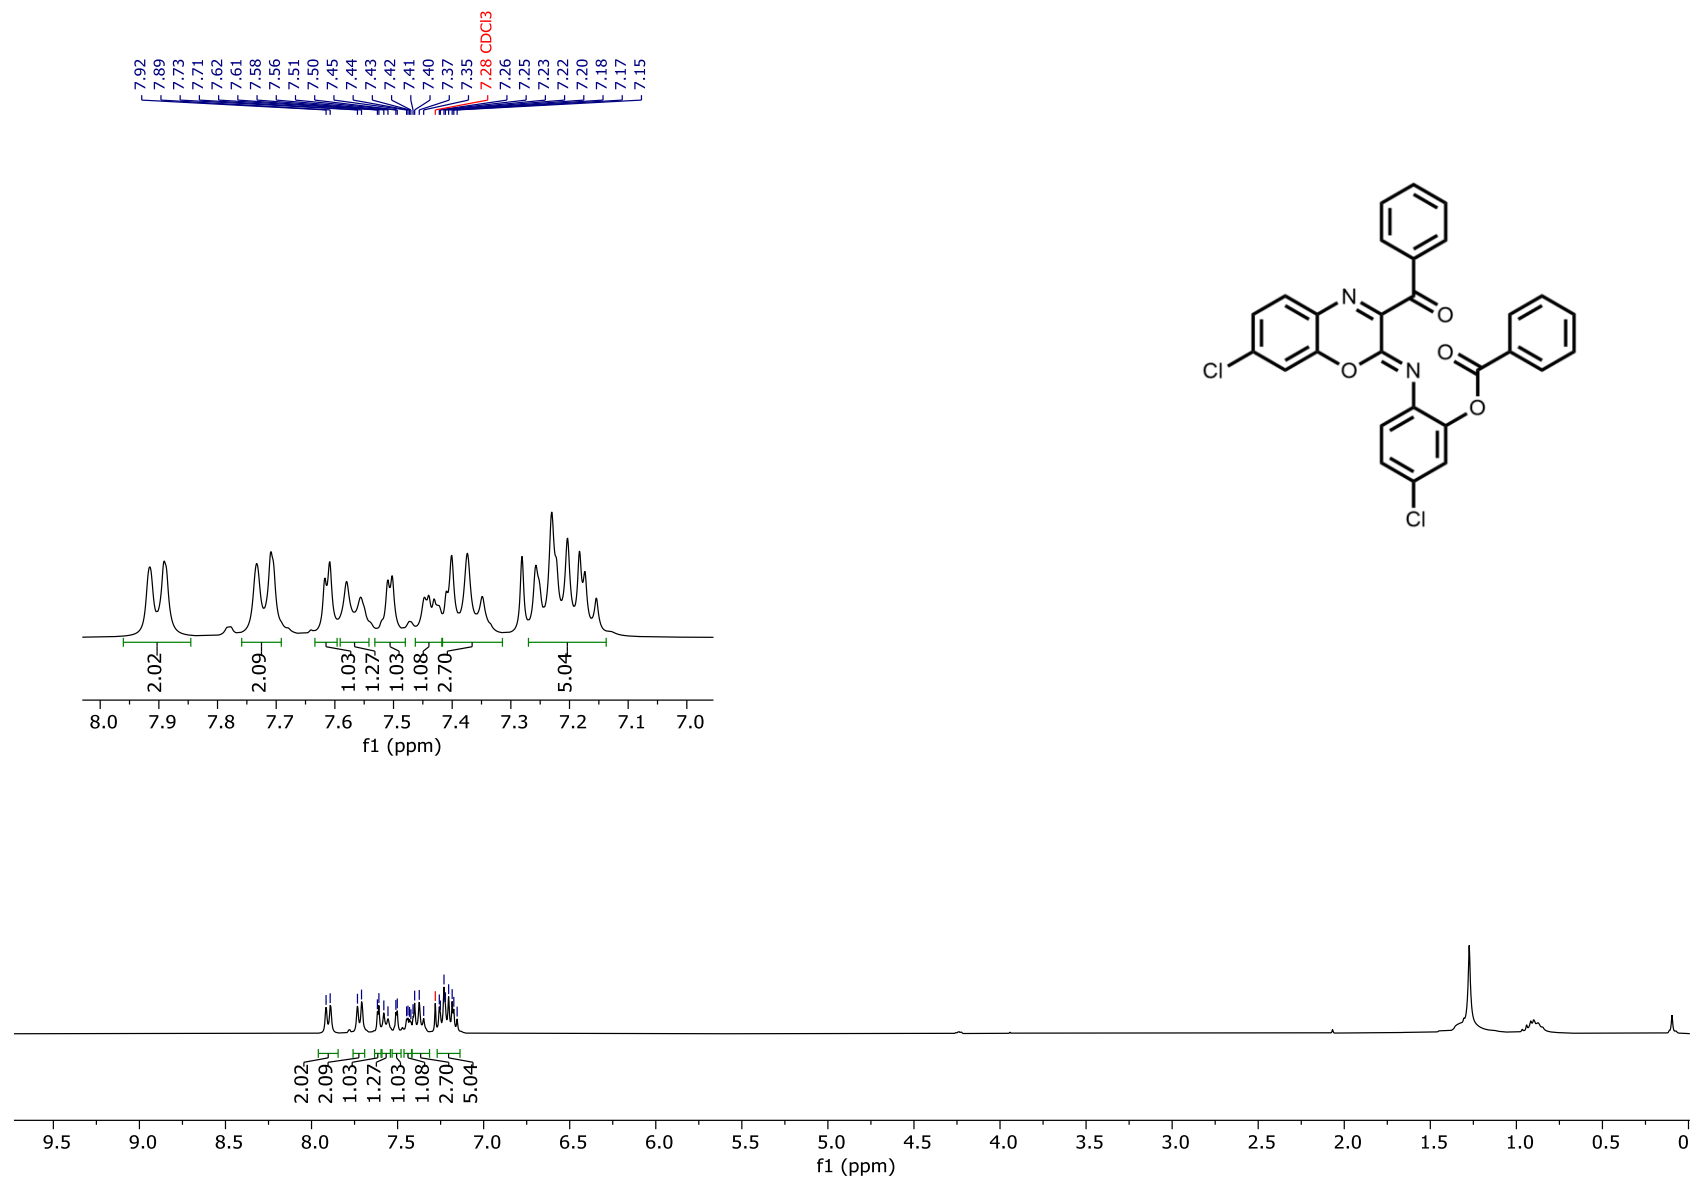

Figure S72. <sup>1</sup>H NMR (300 MHz, CDCl<sub>3</sub>) (Z)-2-((3-benzoyl-7-chloro-2H-benzo[b][1,4]oxazin-2-ylidene)amino)-5-chlorophenyl benzoate (2h).

# Supporting Information

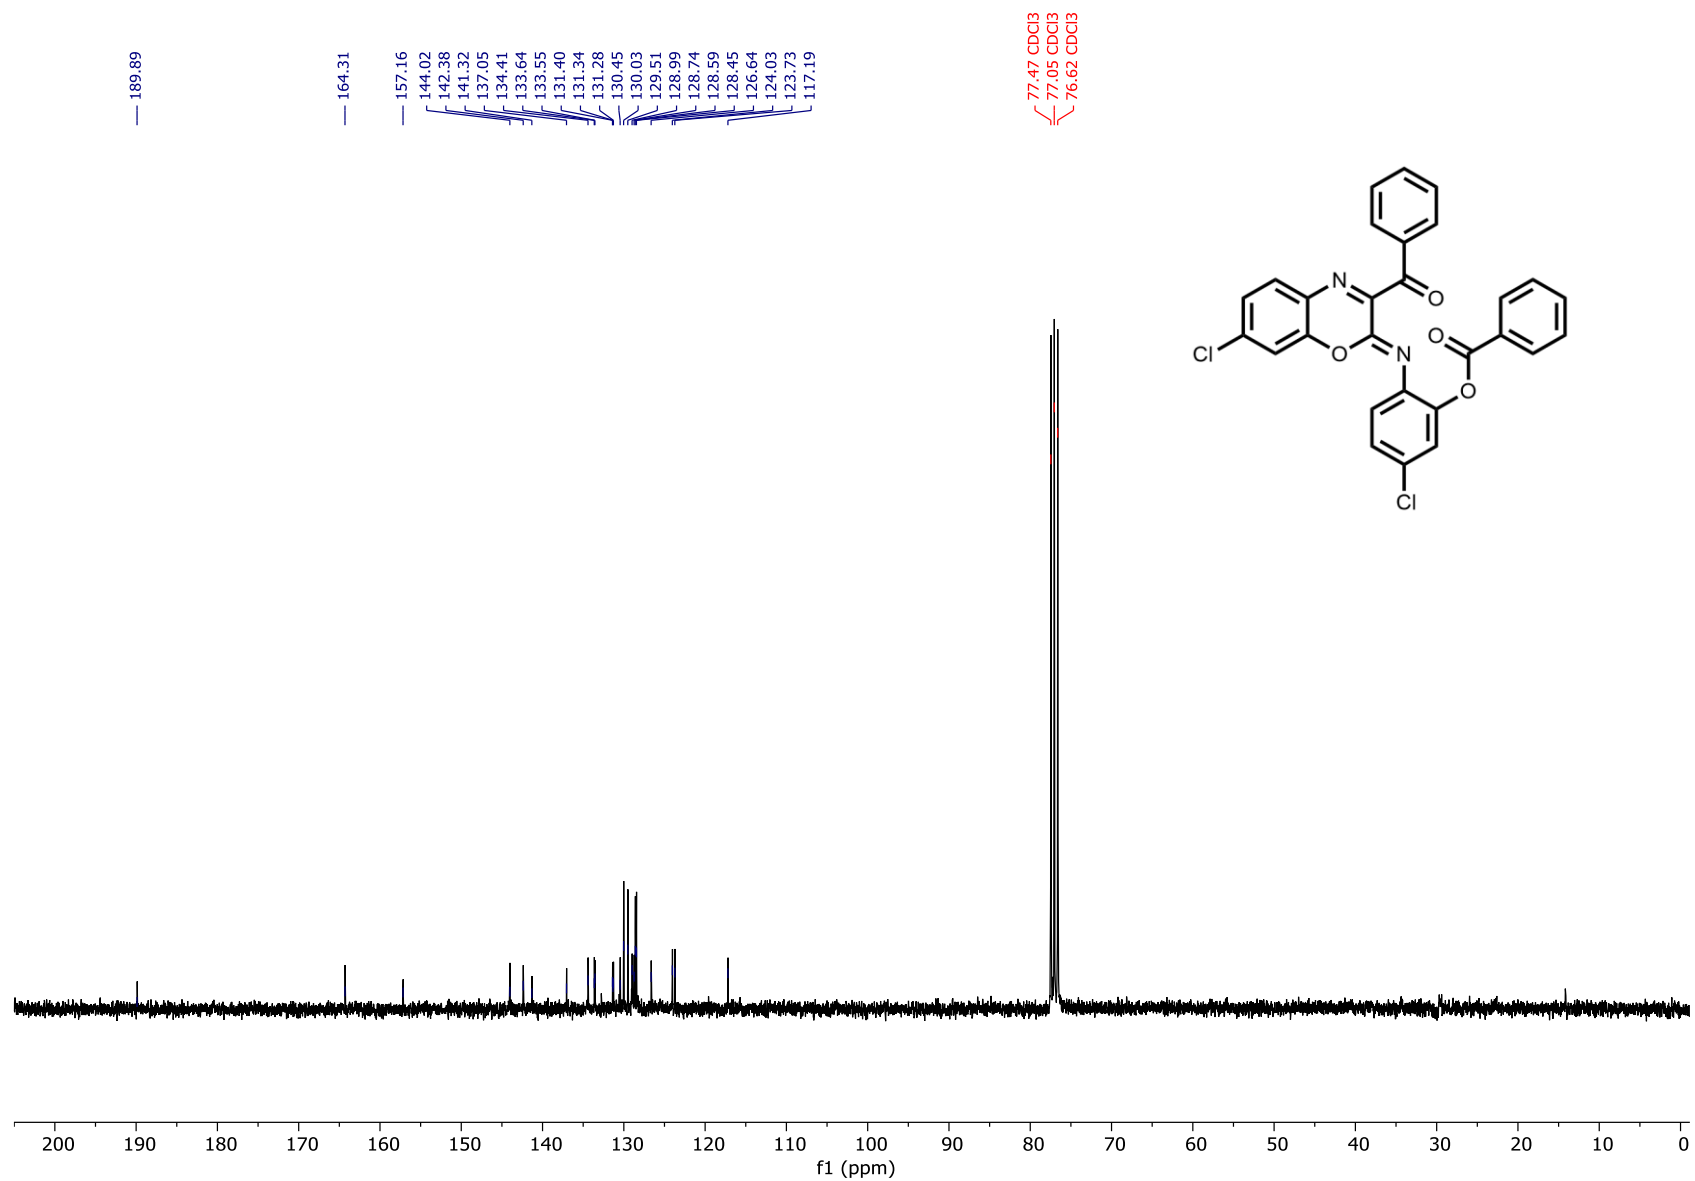

Figure S73.  $^{13}\text{C}$  NMR (75 MHz,  $\text{CDCl}_3$ ) (Z)-2-((3-benzoyl-7-chloro-2H-benzo[b][1,4]oxazin-2-ylidene)amino)-5-chlorophenyl benzoate (2h).

# Supporting Information

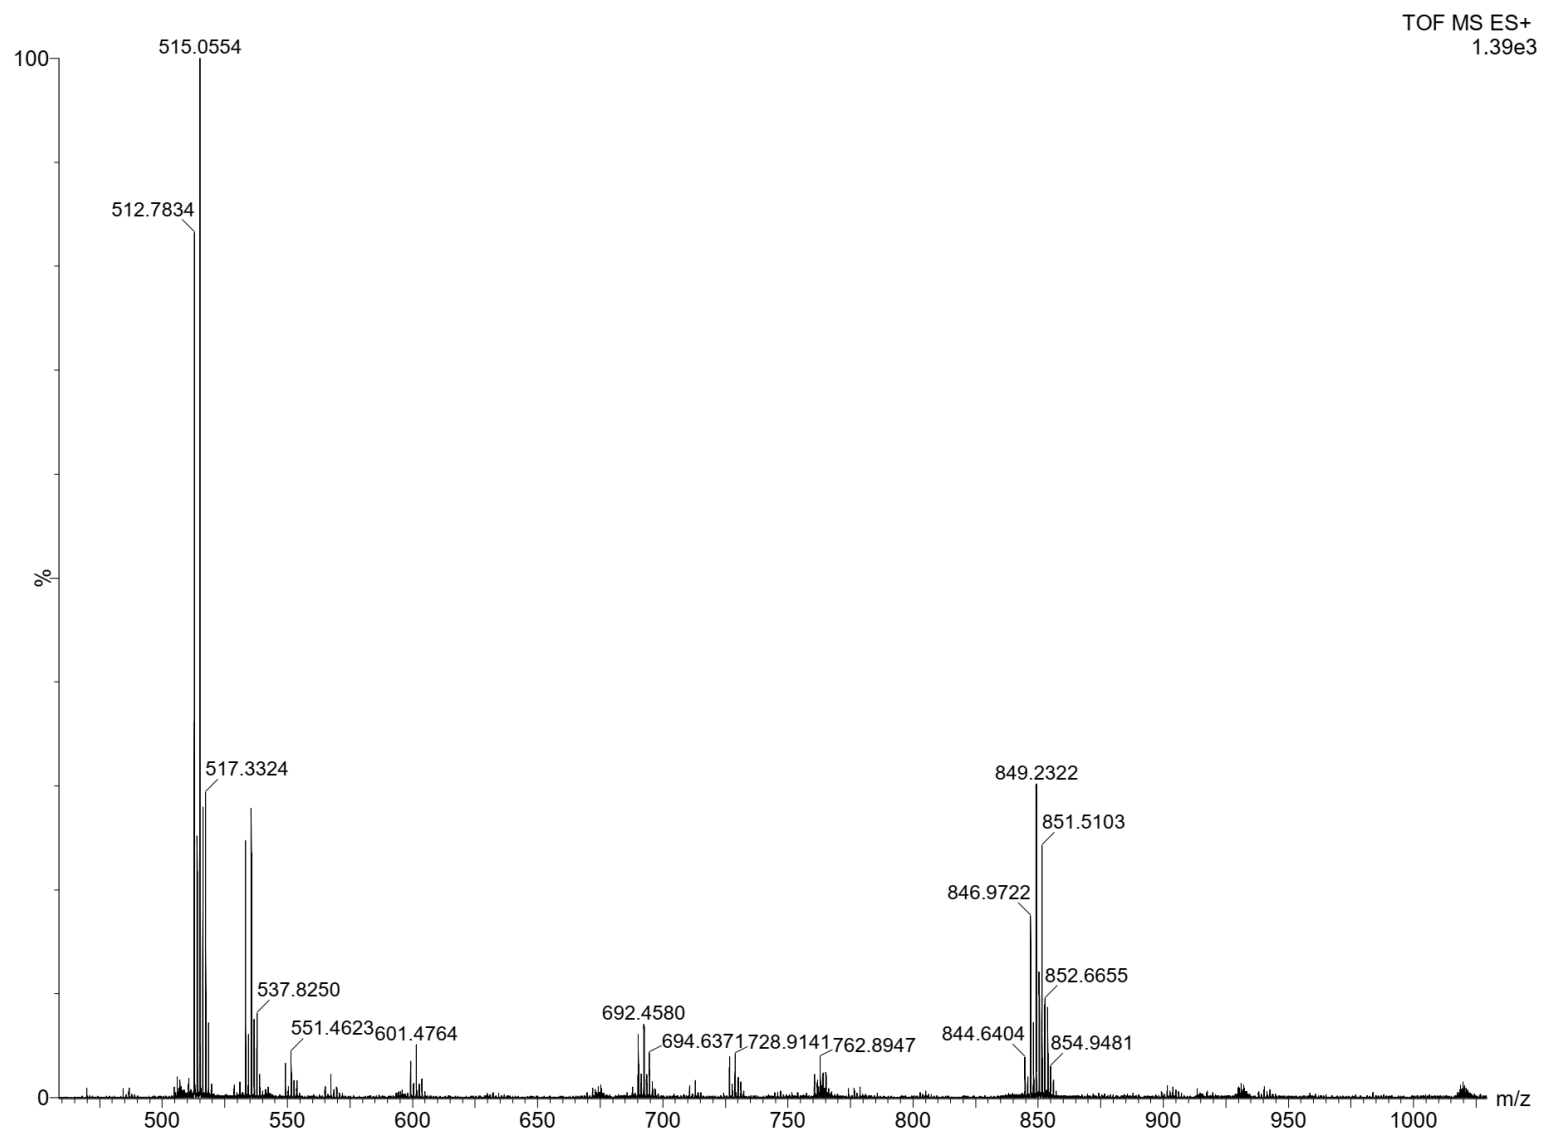

Figure S74. HRMS-ESI (Z)-2-((3-benzoyl-7-chloro-2H-benzo[b][1,4]oxazin-2-ylidene)amino)-5-chlorophenyl benzoate (2h).

# Supporting Information

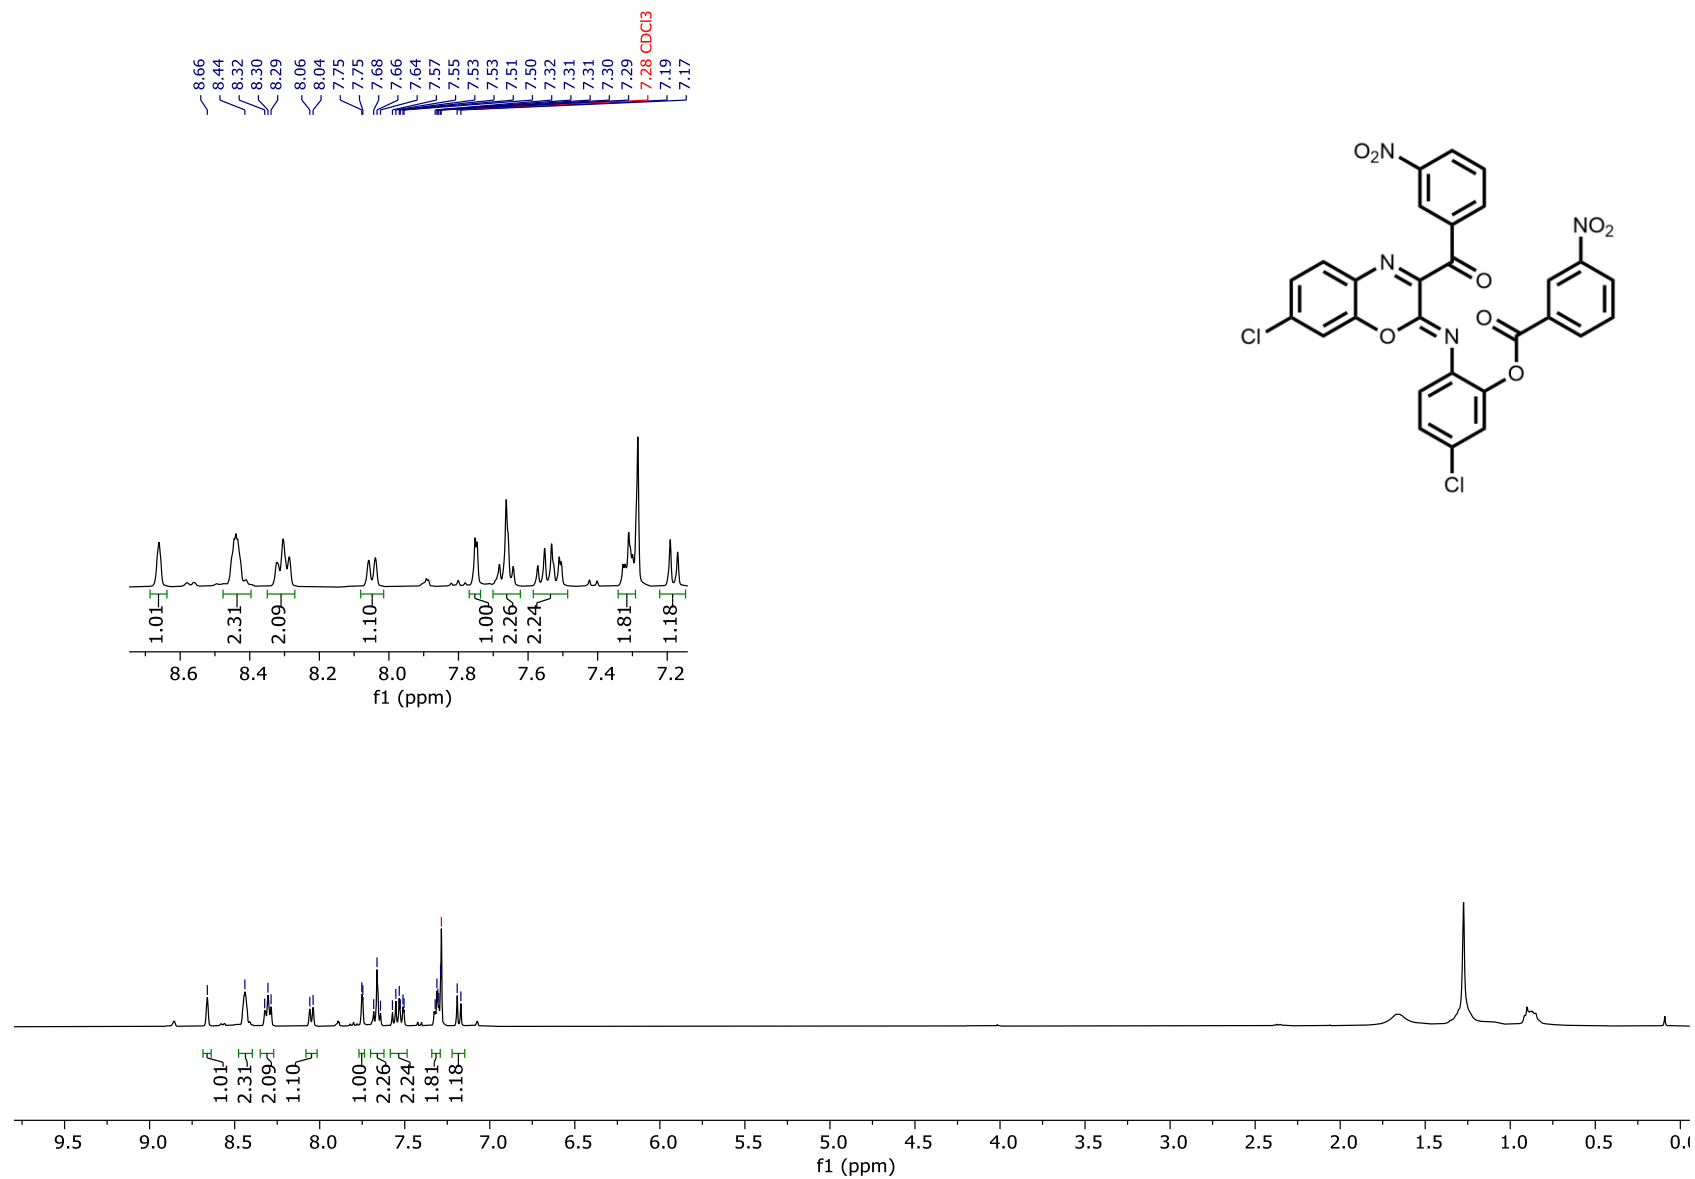

Figure S75. <sup>1</sup>H NMR (400 MHz, CDCl<sub>3</sub>) (Z)-5-chloro-2-((7-chloro-3-(3-nitrobenzoyl)-2H-benzo[b][1,4]oxazin-2-ylidene)amino)phenyl 3-nitrobenzoate (2i).

# Supporting Information

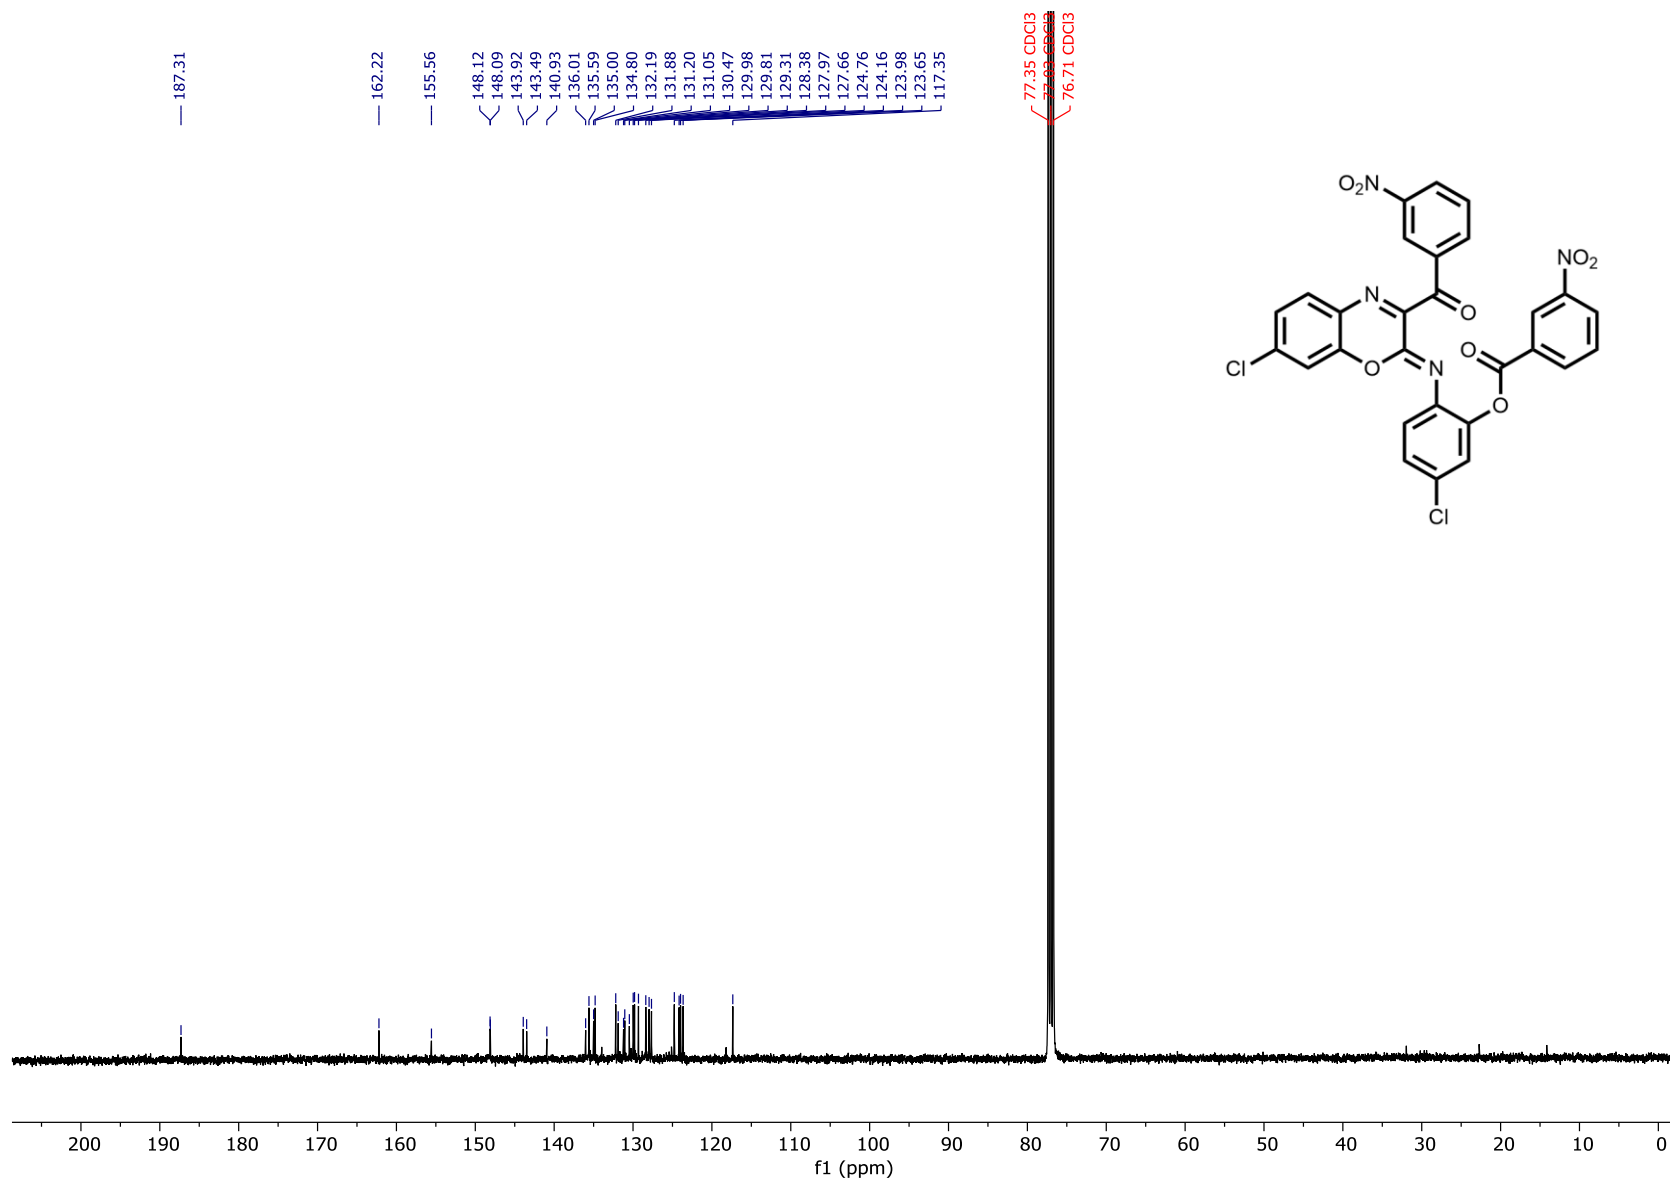

Figure S76. <sup>13</sup>C NMR (101 MHz, CDCl<sub>3</sub>) (Z)-5-chloro-2-((7-chloro-3-(3-nitrobenzoyl)-2H-benzo[b][1,4]oxazin-2-ylidene)amino)phenyl 3-nitrobenzoate (2i).



# Supporting Information

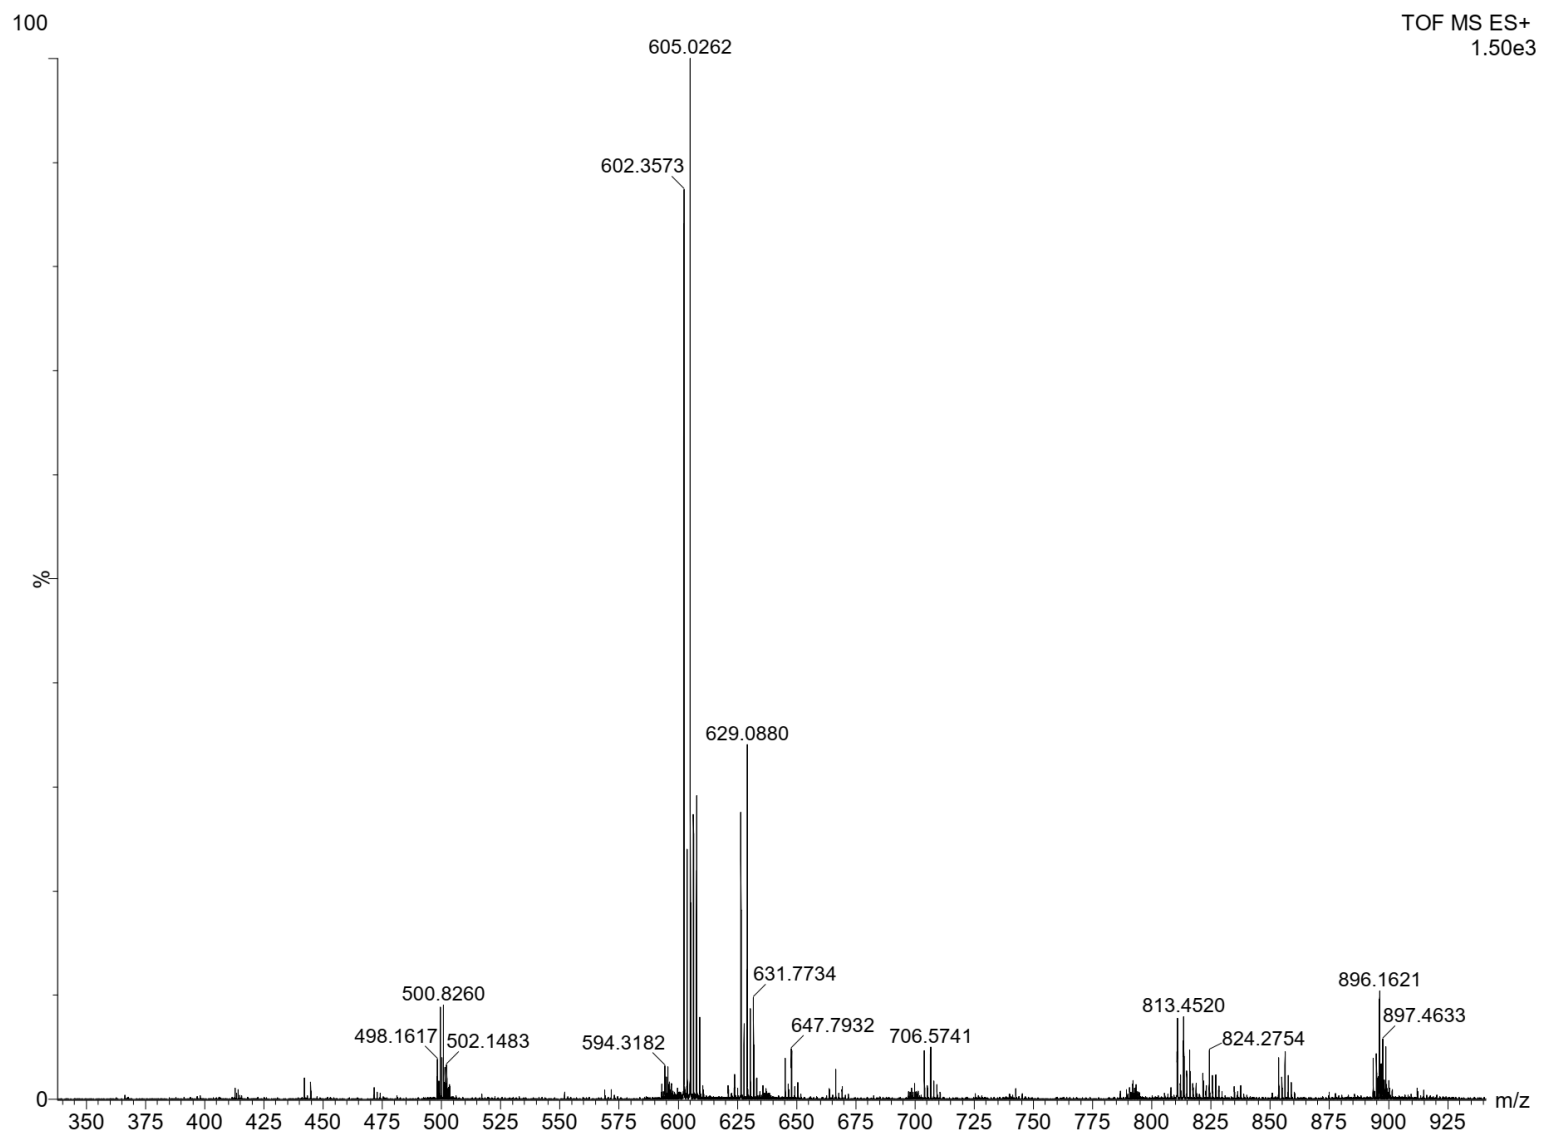

Figure S77. HRMS-ESI (Z)-5-chloro-2-((7-chloro-3-(3-nitrobenzoyl)-2H-benzo[b][1,4]oxazin-2-ylidene)amino)phenyl 3-nitrobenzoate (2i).

# Supporting Information

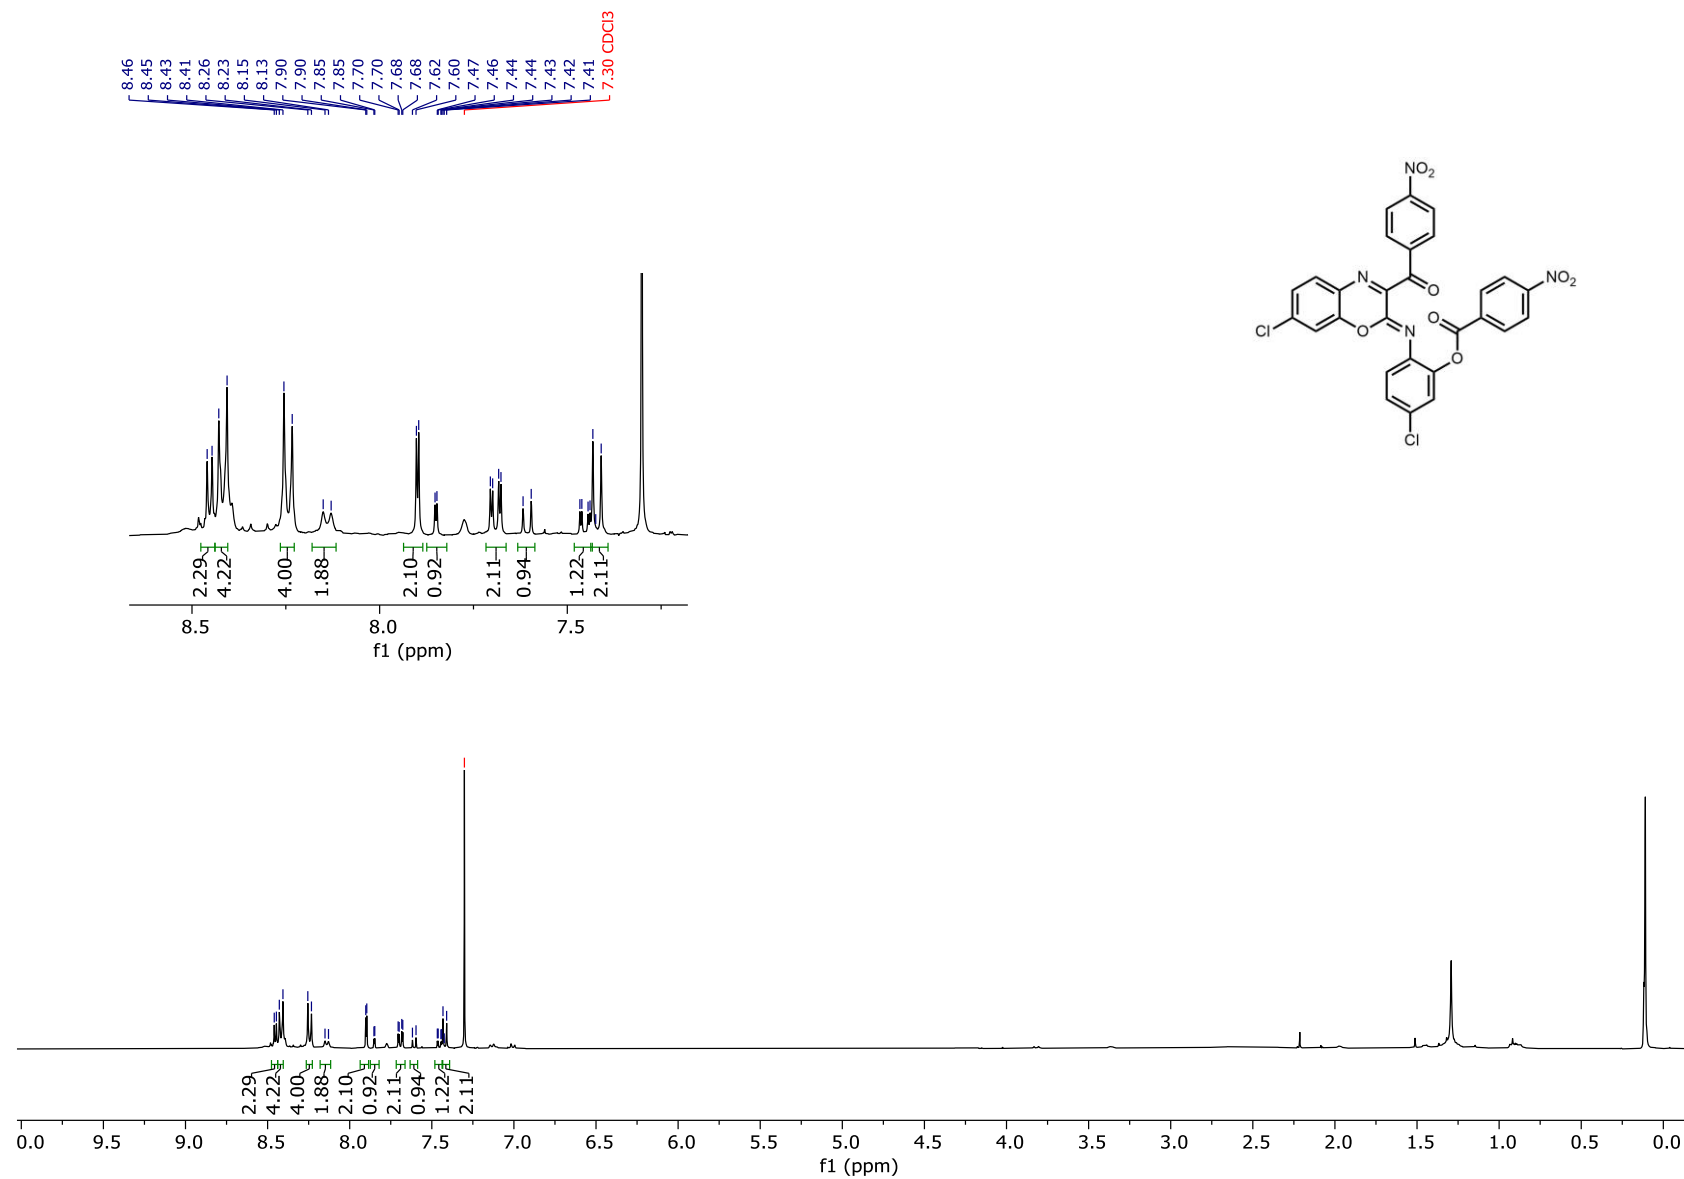

Figure S78. <sup>1</sup>H NMR (400 MHz, CDCl<sub>3</sub>) (Z)-5-chloro-2-((7-chloro-3-(4-nitrobenzoyl)-2H-benzo[b][1,4]oxazin-2-ylidene)amino)phenyl 4-nitrobenzoate (2).

# Supporting Information

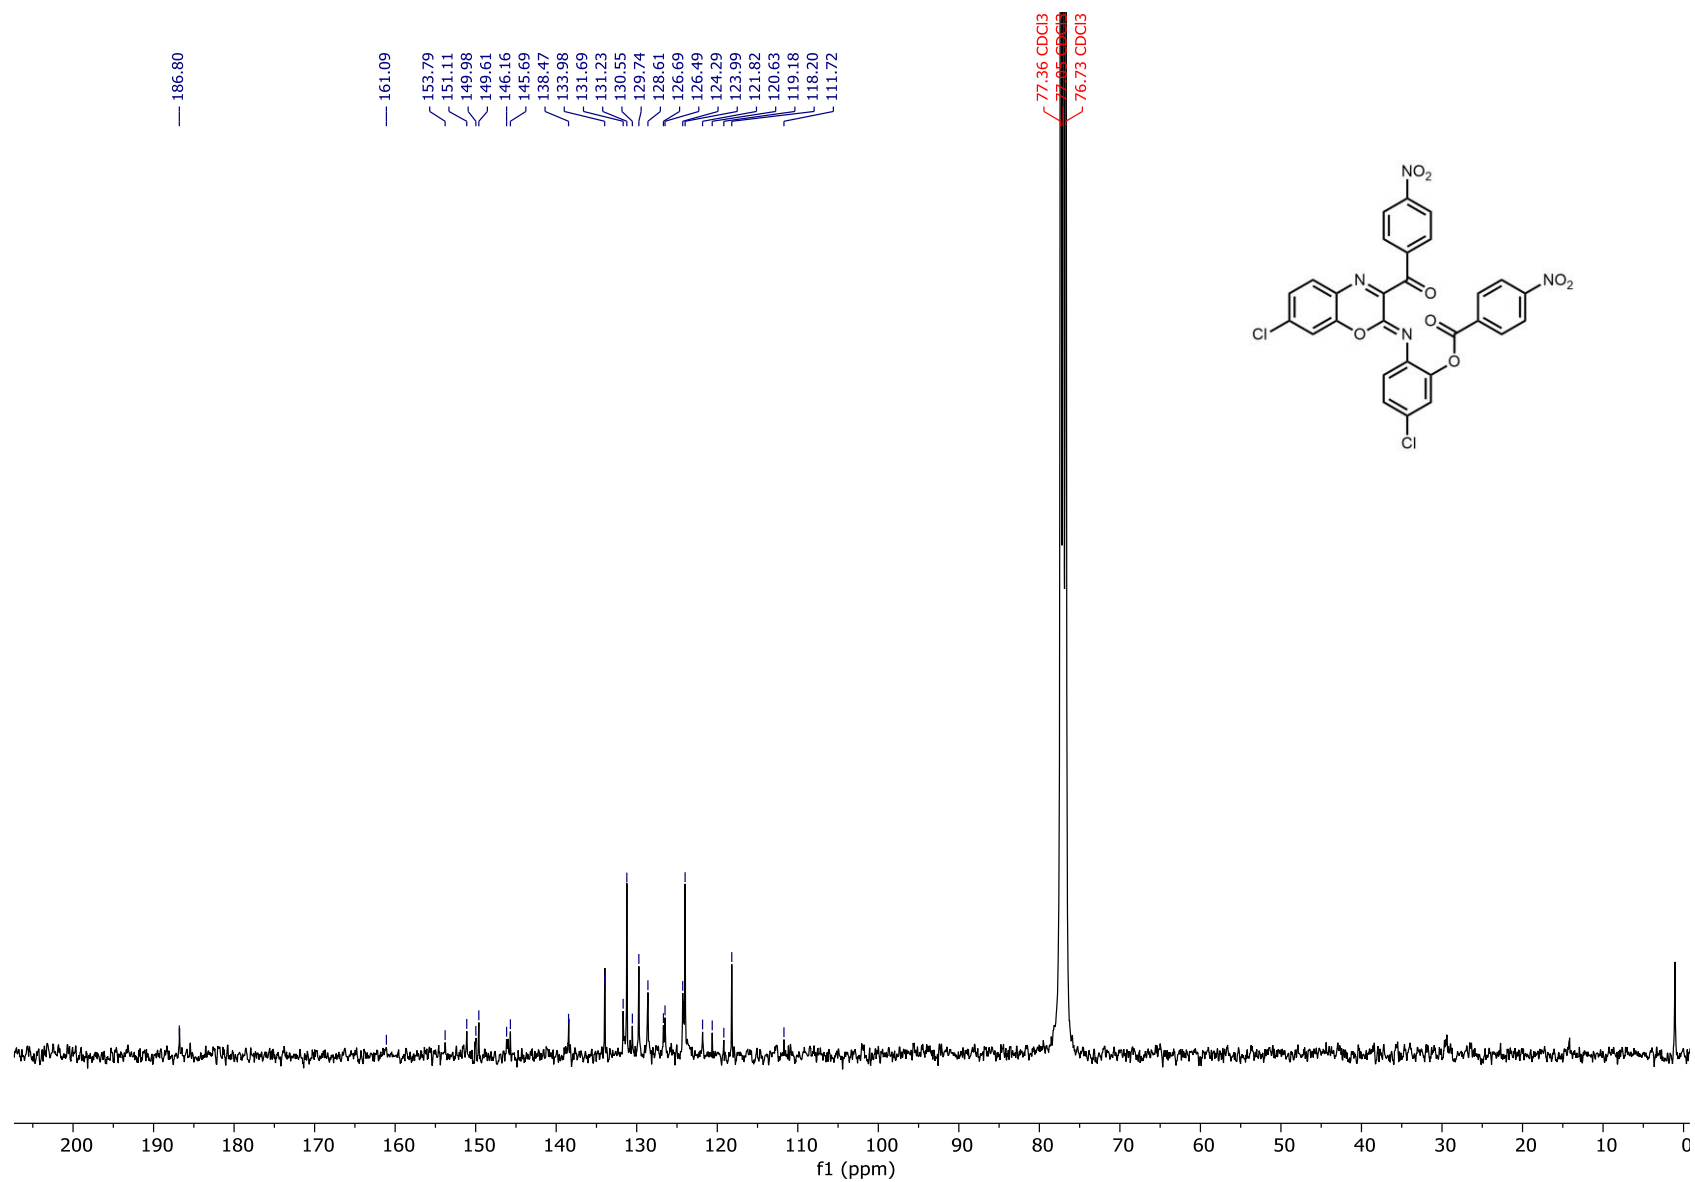

Figure S79.  $^{13}\text{C}$  NMR (101 MHz,  $\text{CDCl}_3$ ) (Z)-5-chloro-2-((7-chloro-3-(4-nitrobenzoyl)-2H-benzo[b][1,4]oxazin-2-ylidene)amino)phenyl 4-nitrobenzoate (2).

## Supporting Information

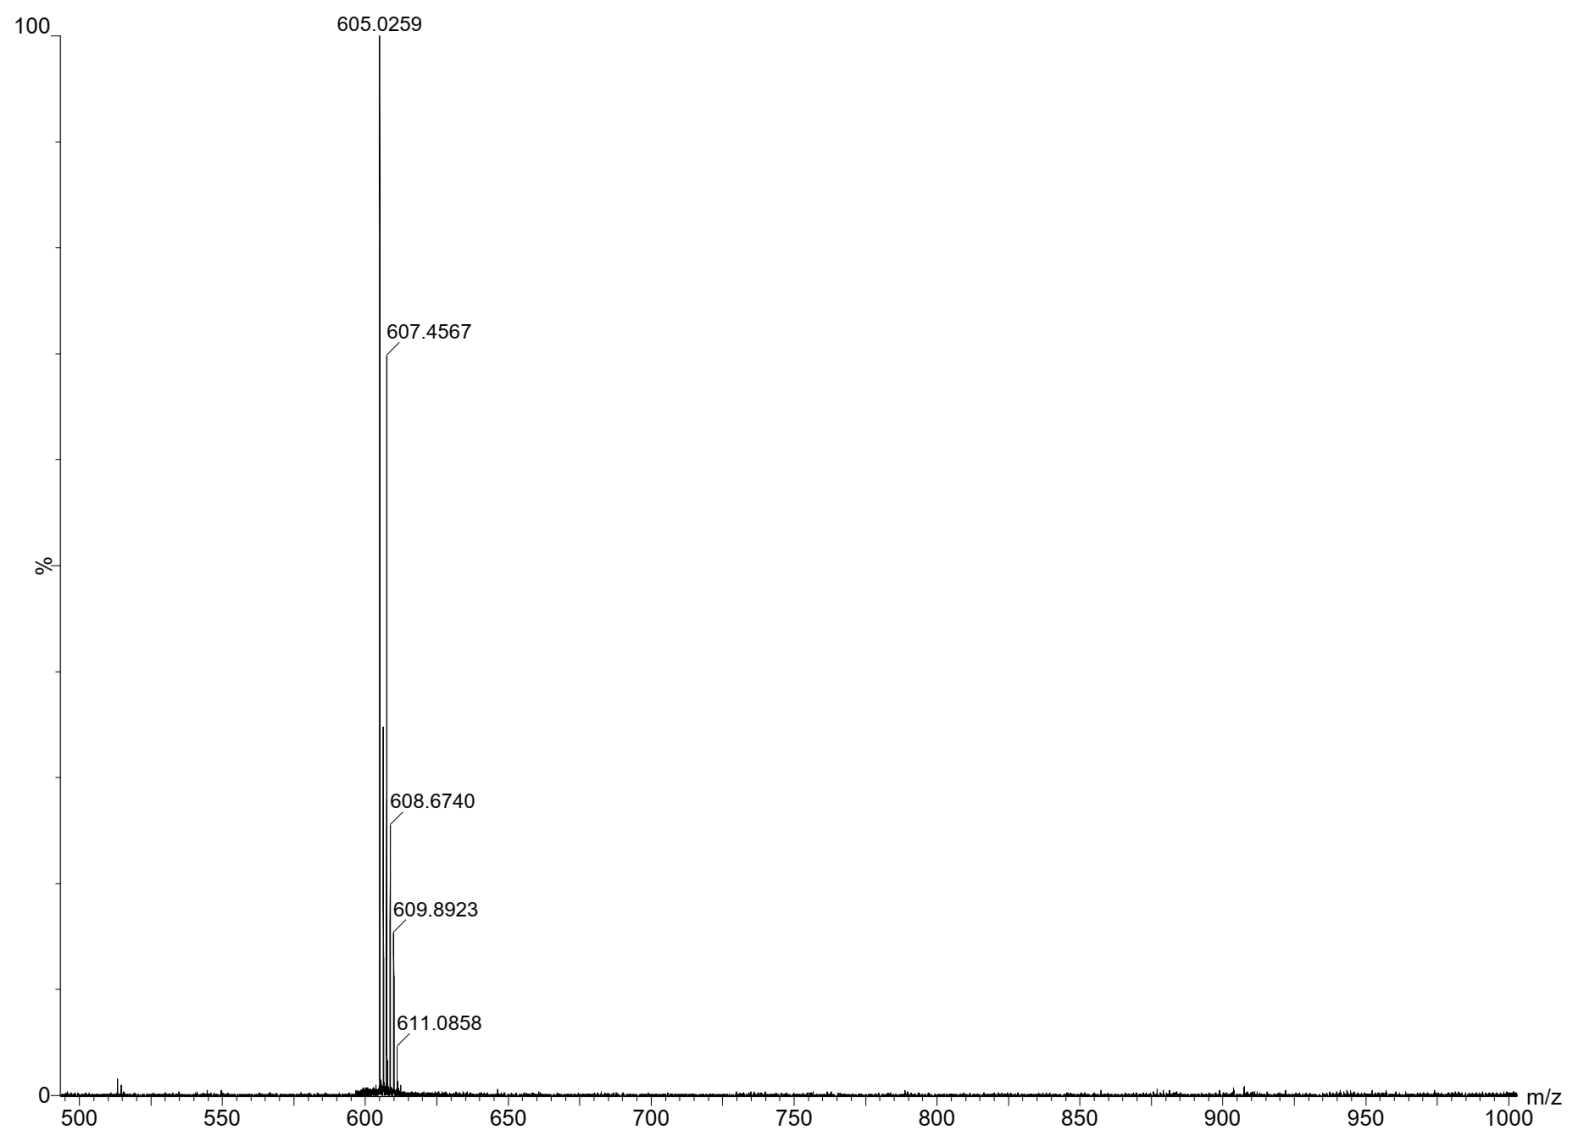

Figure S80. HRMS-ESI (Z)-5-chloro-2-((7-chloro-3-(4-nitrobenzoyl)-2H-benzo[b][1,4]oxazin-2-ylidene)amino)phenyl 4-nitrobenzoate (2j).

# Supporting Information

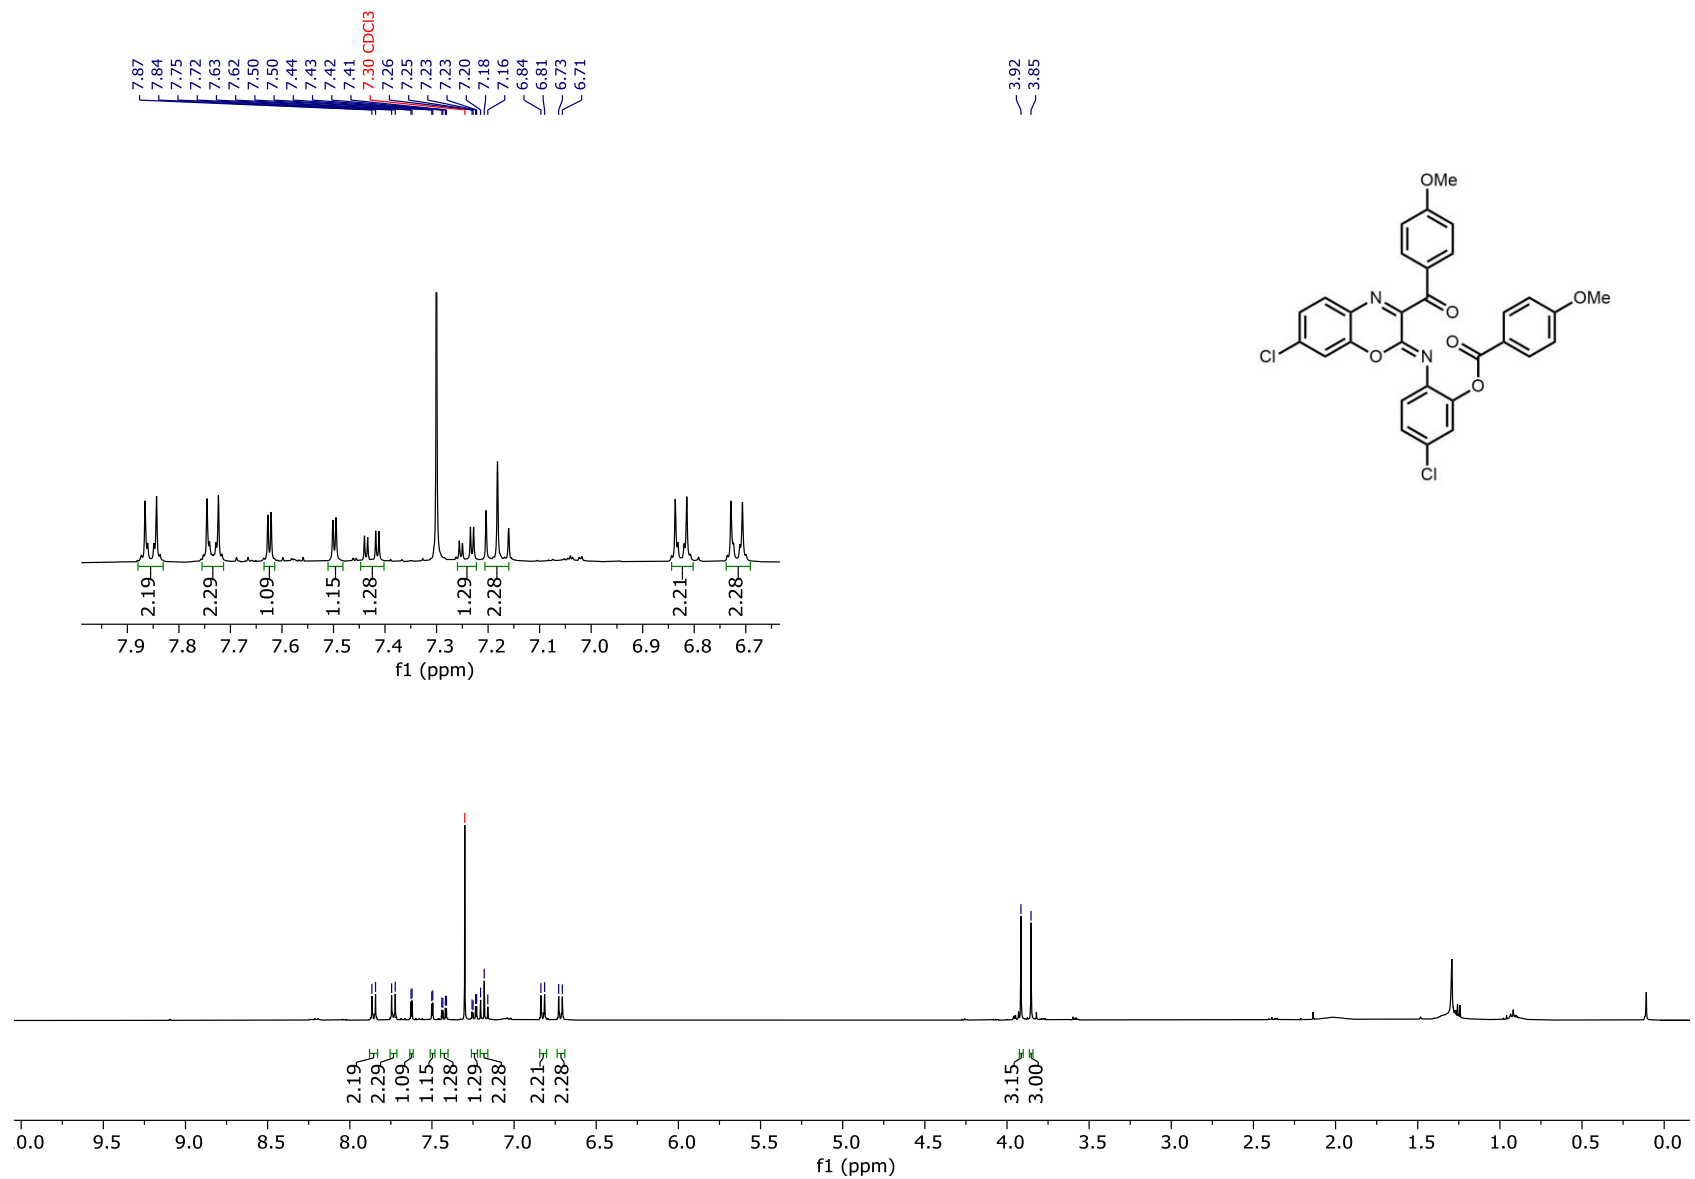

Figure S81. <sup>1</sup>H NMR (400 MHz, CDCl<sub>3</sub>) (Z)-5-chloro-2-((7-chloro-3-(4-methoxybenzoyl)-2H-benzo[b][1,4]oxazin-2-ylidene)amino)phenyl 4-methoxybenzoate (2k).

# Supporting Information

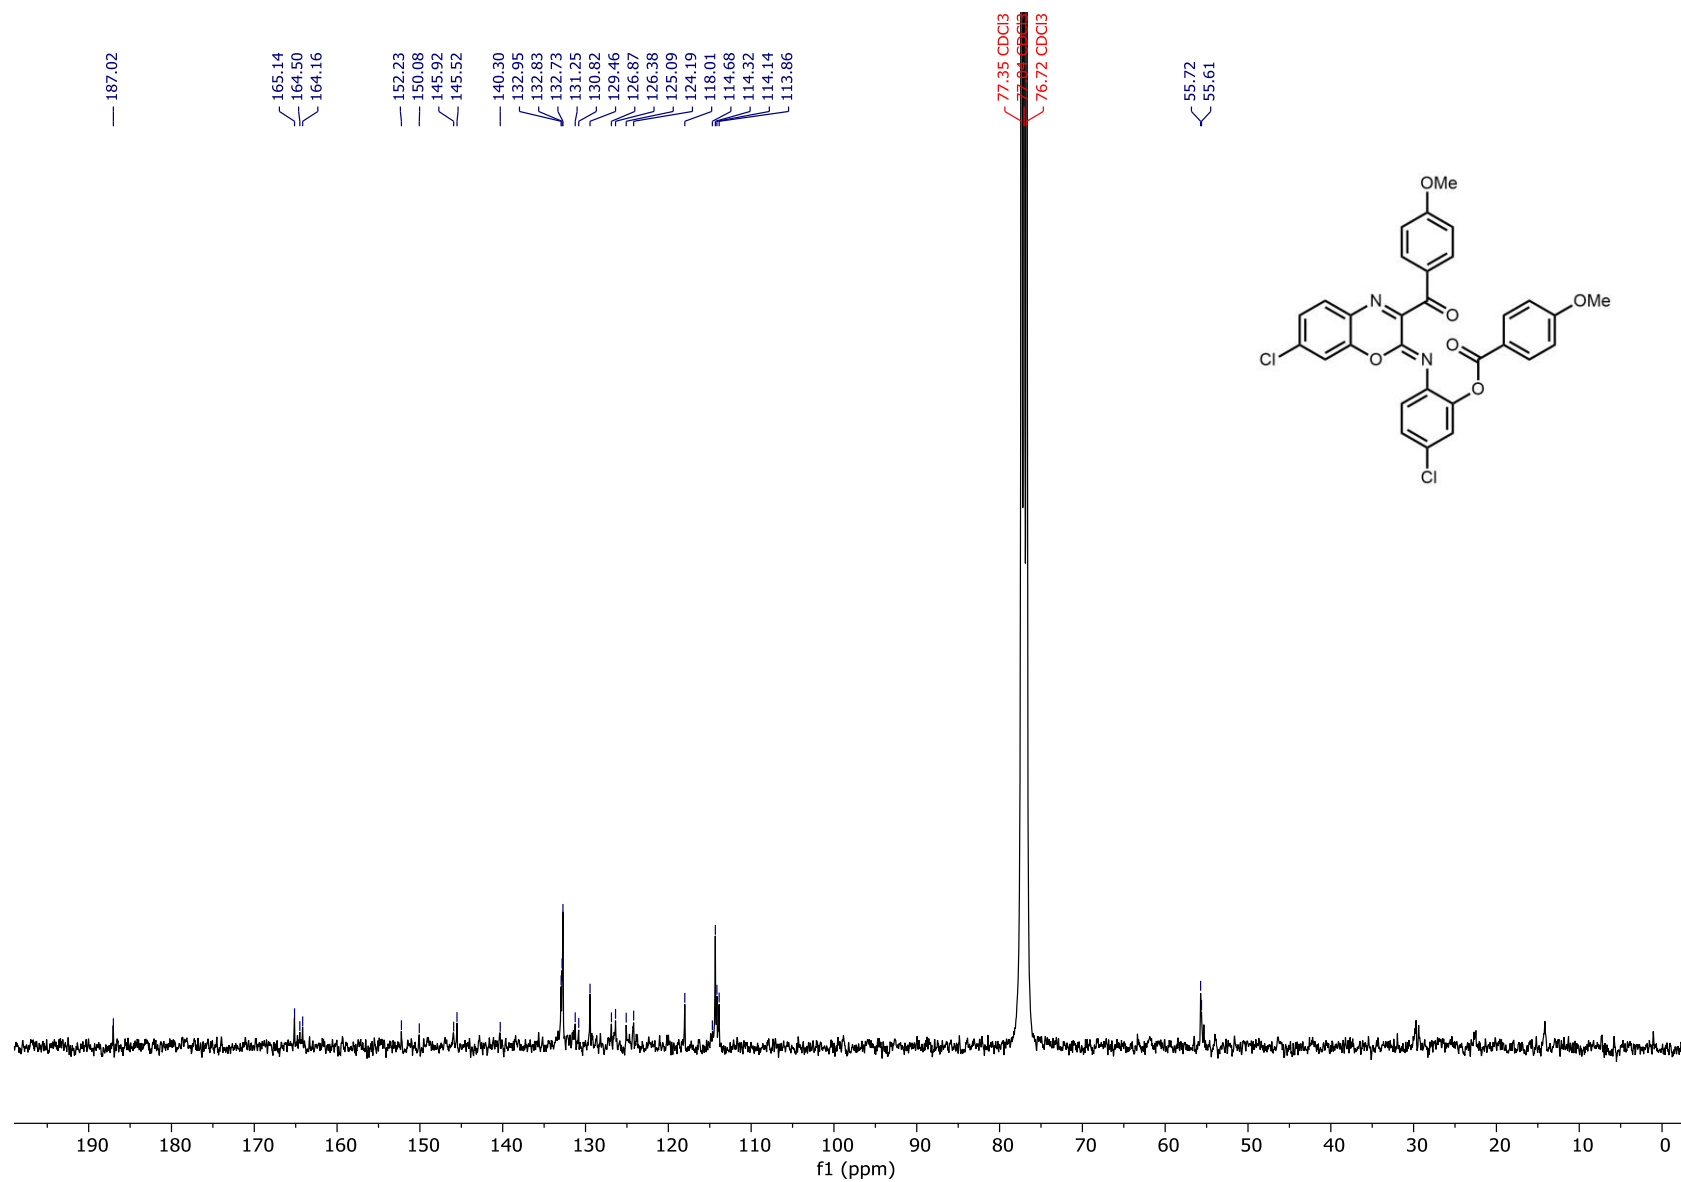

Figure S82. <sup>13</sup>C NMR (101 MHz, CDCl<sub>3</sub>) (Z)-5-chloro-2-((7-chloro-3-(4-nitrobenzoyl)-2H-benzo[b][1,4]oxazin-2-ylidene)amino)phenyl 4-nitrobenzoate (2k).

## Supporting Information

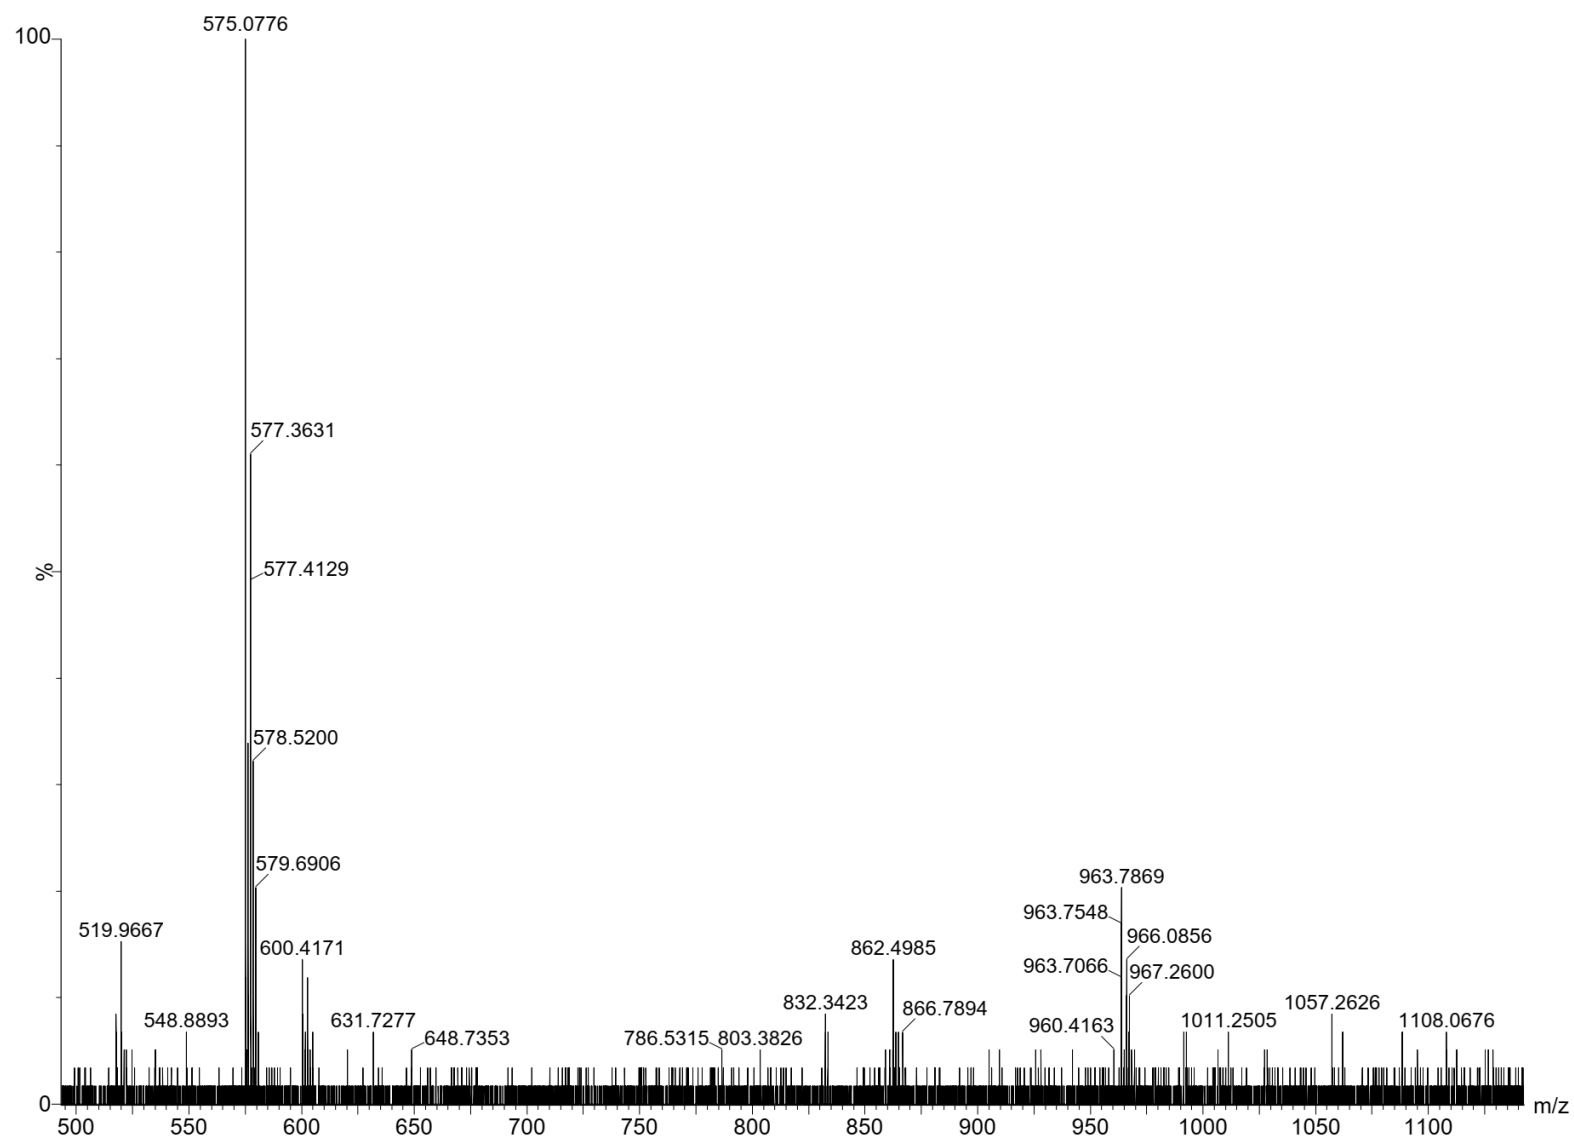

Figure S83. HRMS-ESI (Z)-5-chloro-2-((7-chloro-3-(4-nitrobenzoyl)-2H-benzo[b][1,4]oxazin-2-ylidene)amino)phenyl 4-nitrobenzoate (2k).

# Supporting Information

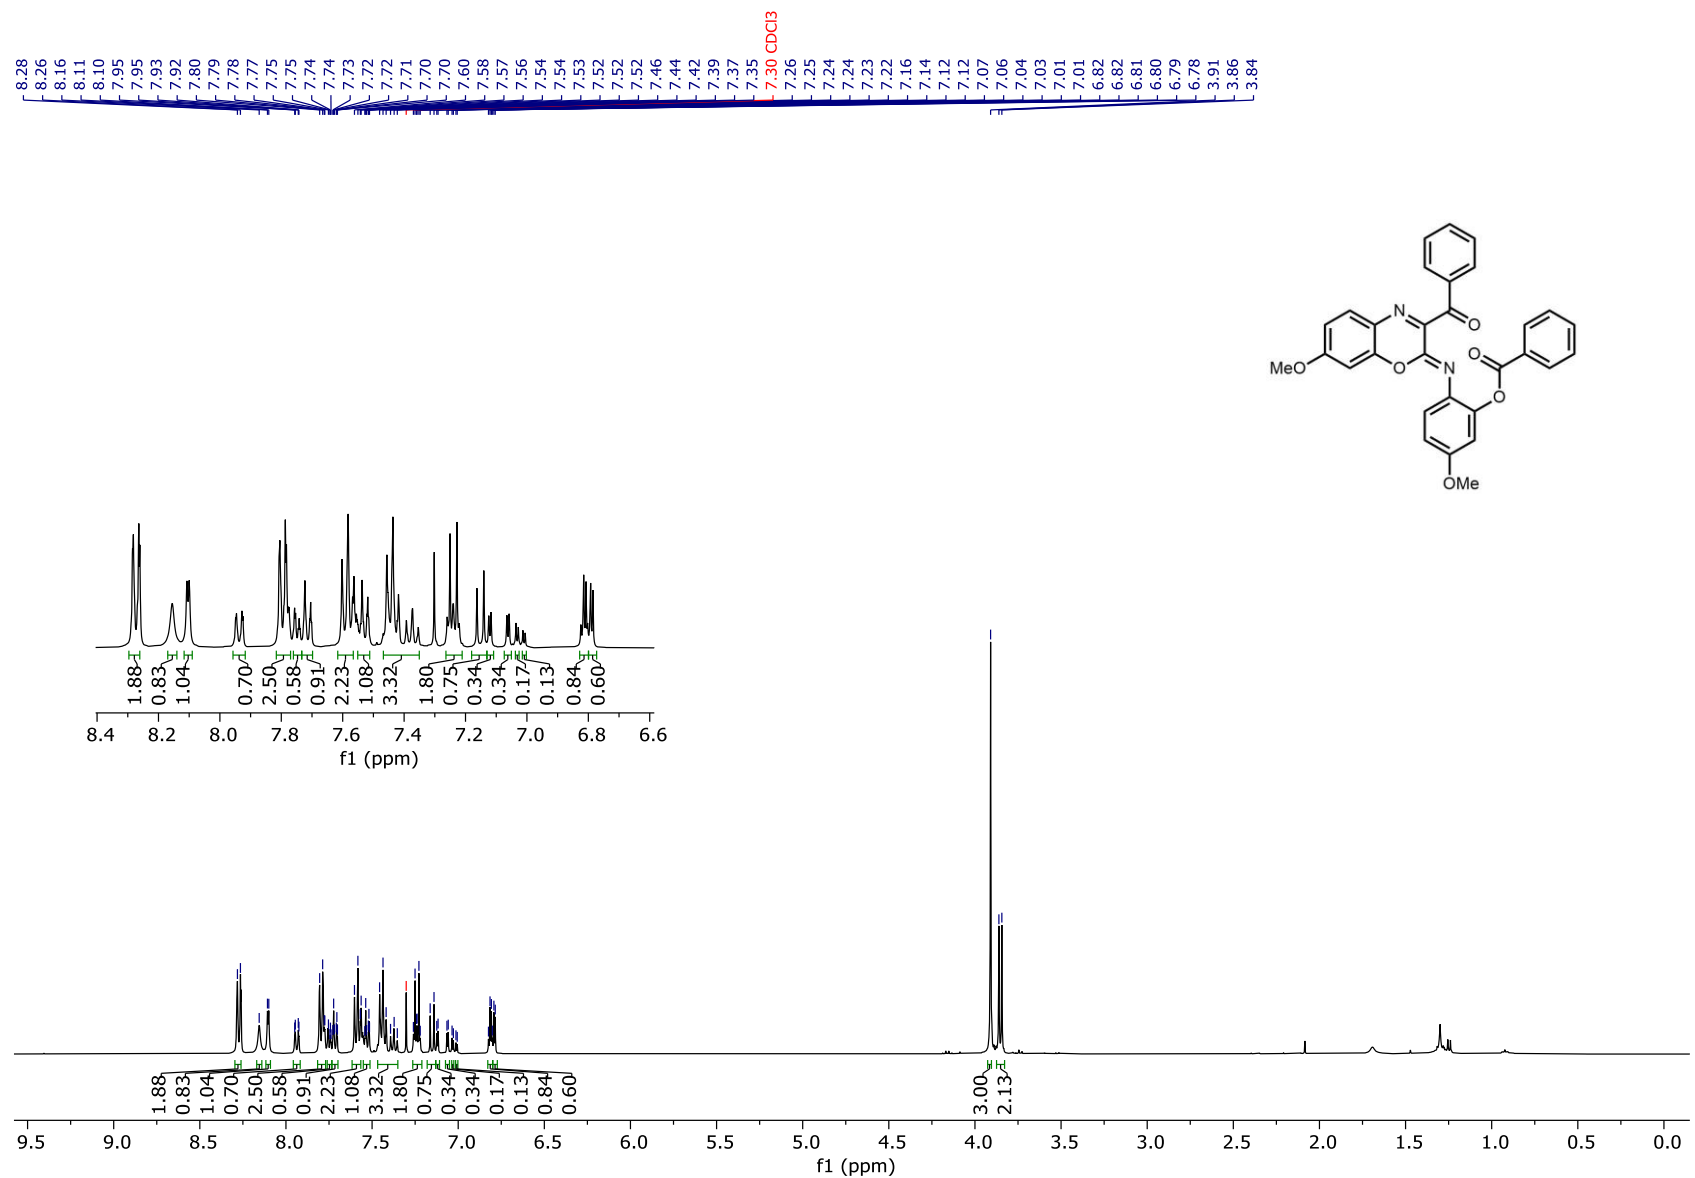

Figure S84. <sup>1</sup>H NMR (400 MHz, CDCl<sub>3</sub>) (Z)-2-((3-benzoyl-7-methoxy-2H-benzo[b][1,4]oxazin-2-ylidene)amino)-5-methoxyphenyl benzoate (2l).



# Supporting Information

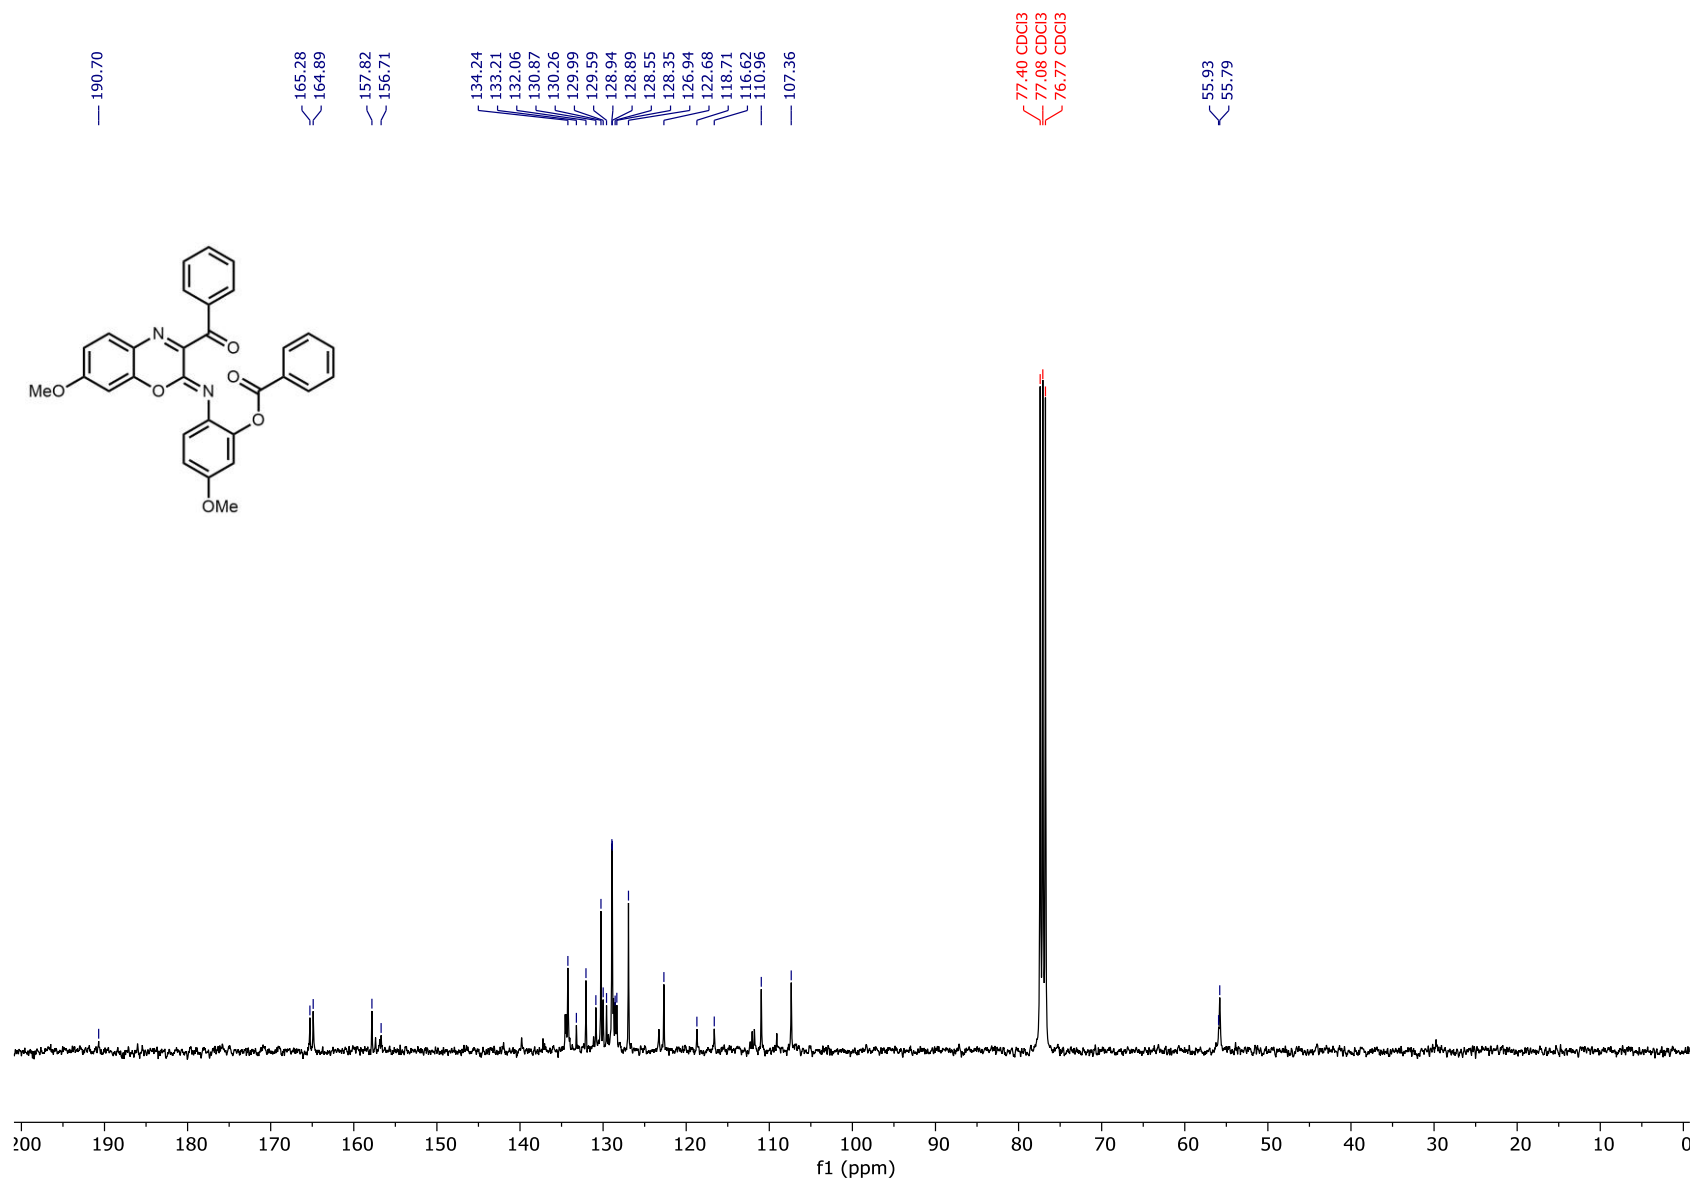

Figure S85. <sup>13</sup>C NMR (101 MHz, CDCl<sub>3</sub>) (Z)-2-((3-benzoyl-7-methoxy-2H-benzo[b][1,4]oxazin-2-ylidene)amino)-5-methoxyphenyl benzoate (2l).

## Supporting Information

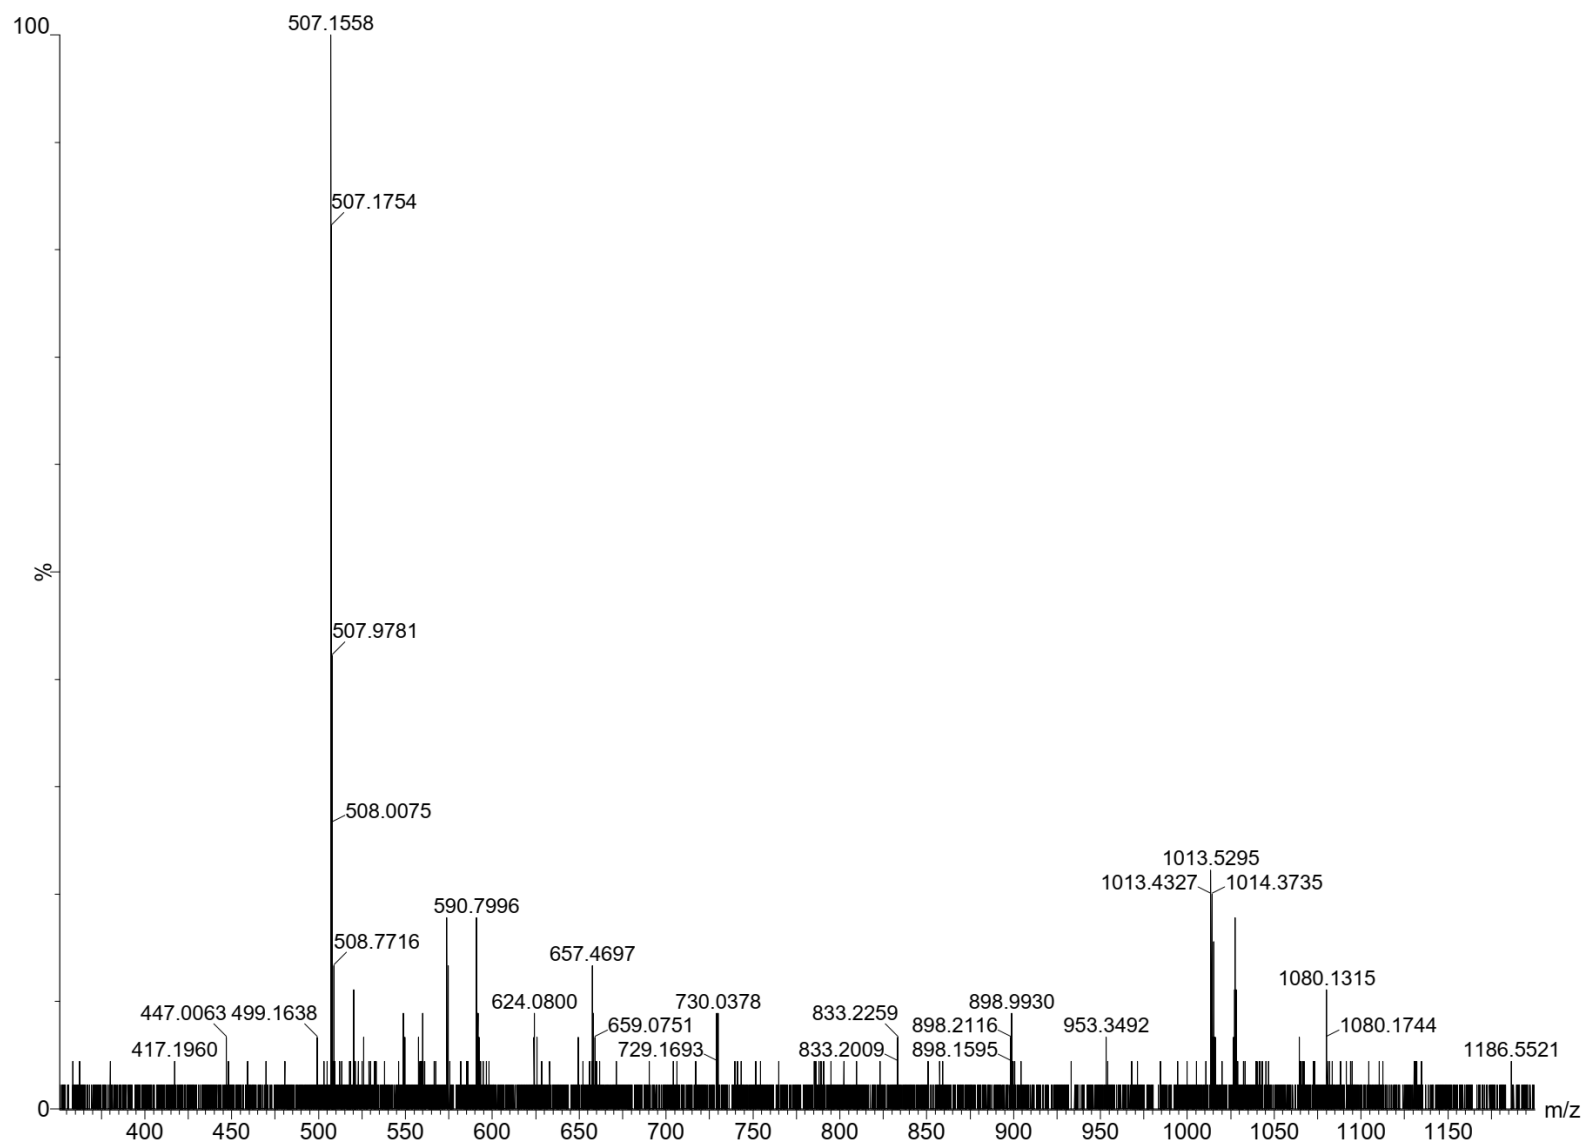

Figure S86. HRMS-ESI (Z)-2-((3-benzoyl-7-methoxy-2H-benzo[b][1,4]oxazin-2-ylidene)amino)-5-methoxyphenyl benzoate (2l).

# Supporting Information

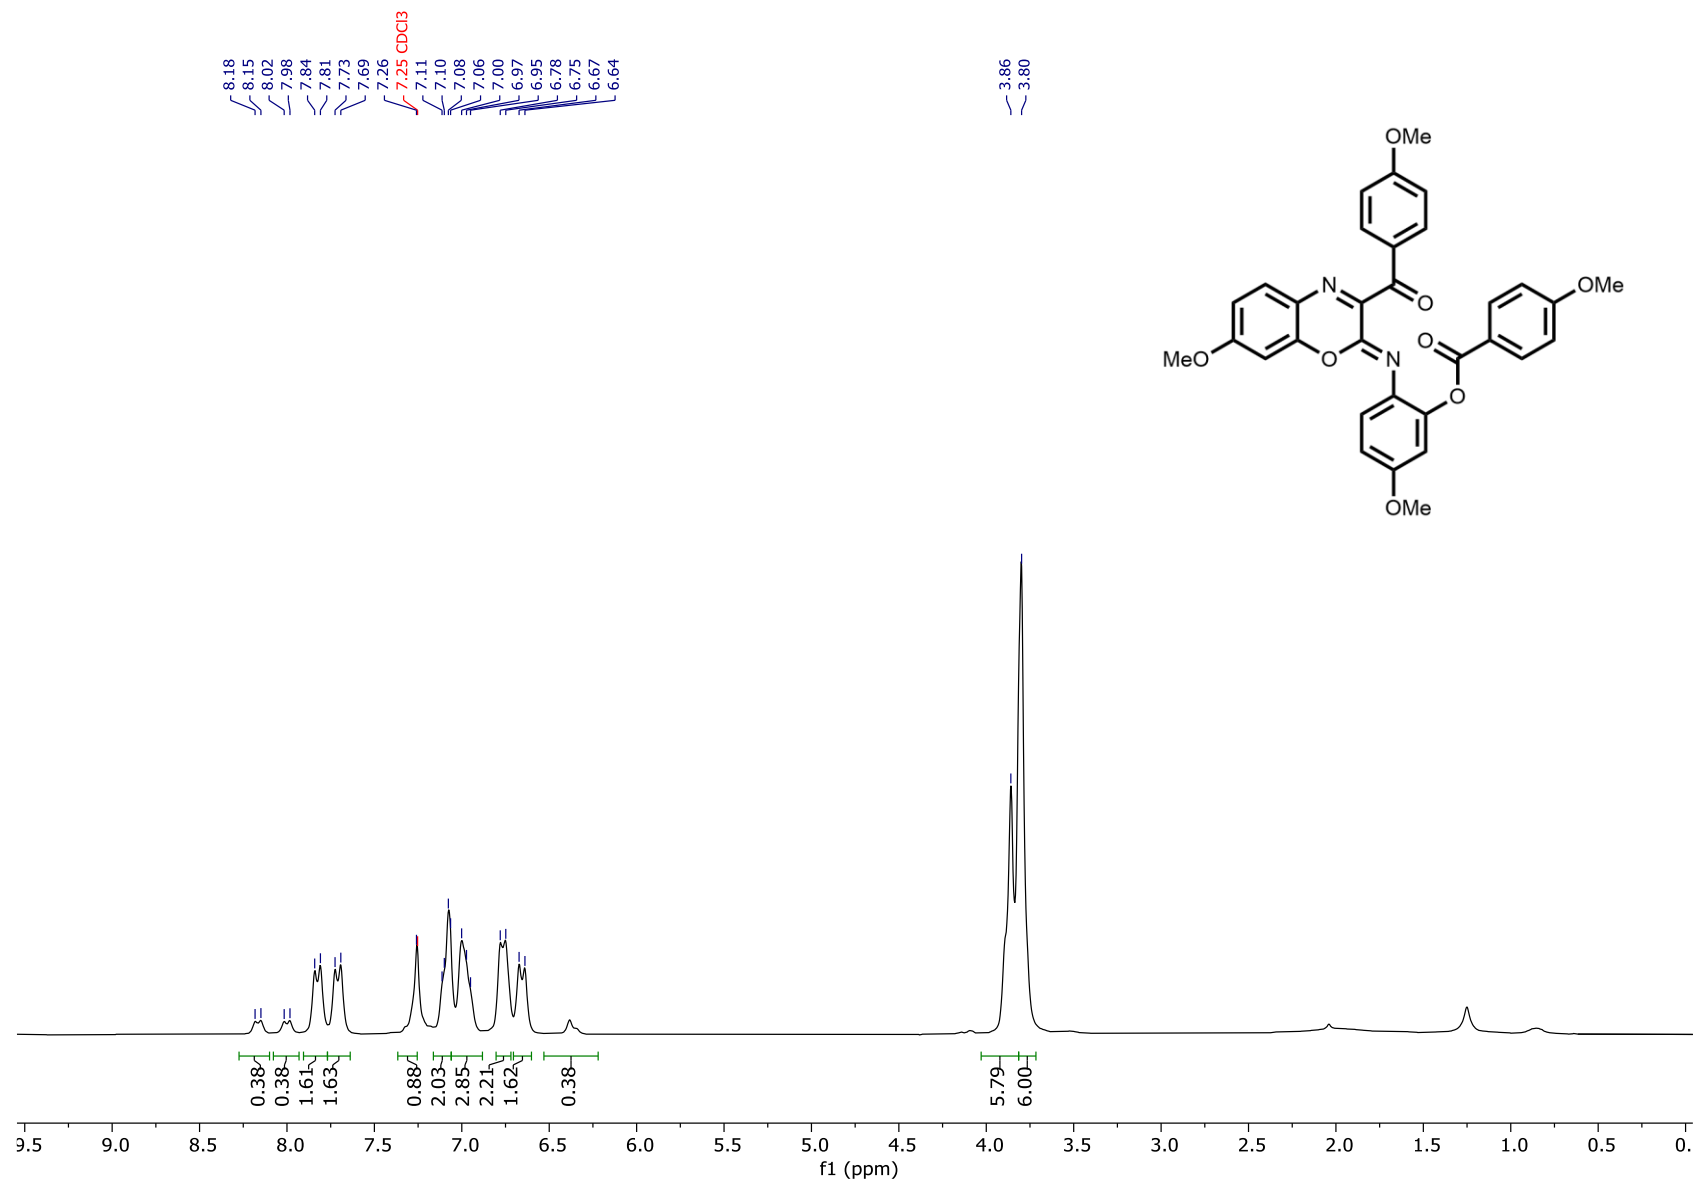

Figure S87. <sup>1</sup>H NMR (250 MHz, CDCl<sub>3</sub>) (Z)-5-methoxy-2-((7-methoxy-3-(4-methoxybenzoyl)-2H-benzo[b][1,4]oxazin-2-ylidene)amino)phenyl 4-methoxybenzoate (2m).

# Supporting Information

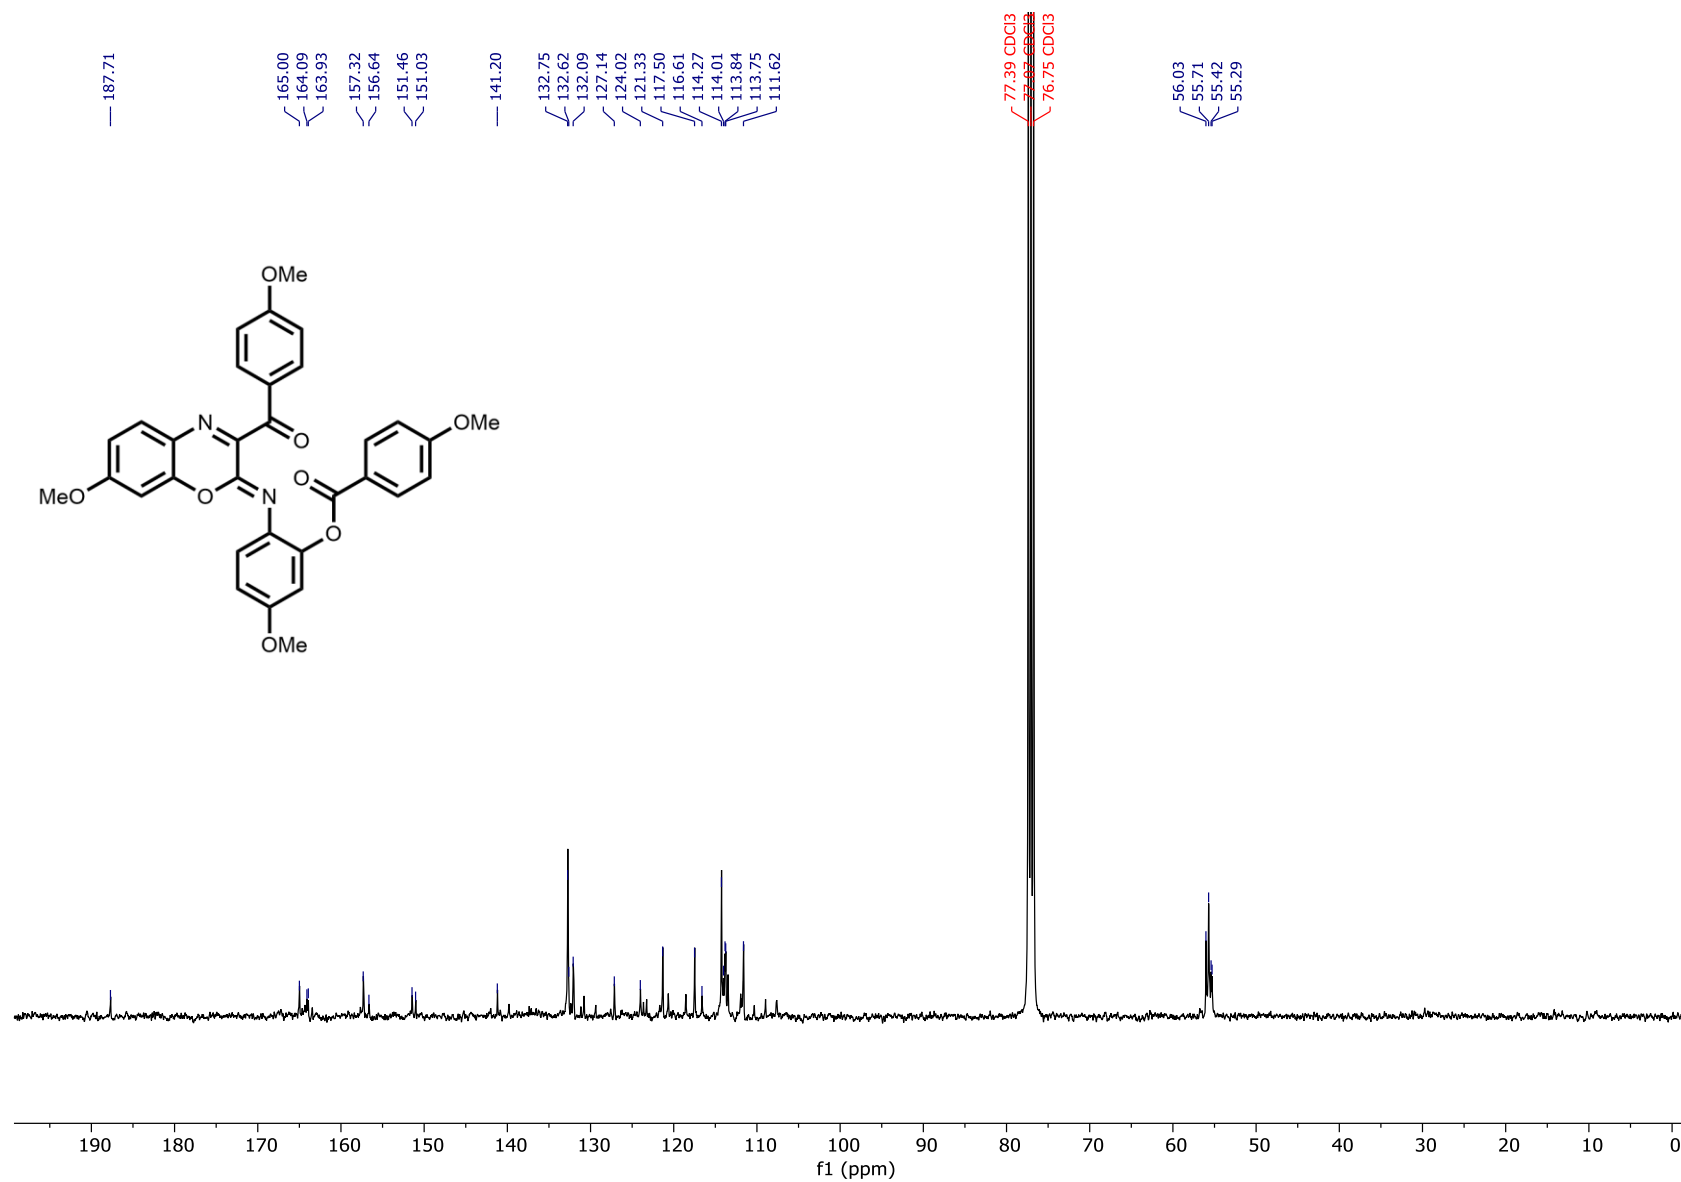

Figure S88. <sup>13</sup>C NMR (101 MHz, CDCl<sub>3</sub>) (Z)-5-methoxy-2-((7-methoxy-3-(4-methoxybenzoyl)-2H-benzo[b][1,4]oxazin-2-ylidene)amino)phenyl 4-methoxybenzoate (2m).

## Supporting Information

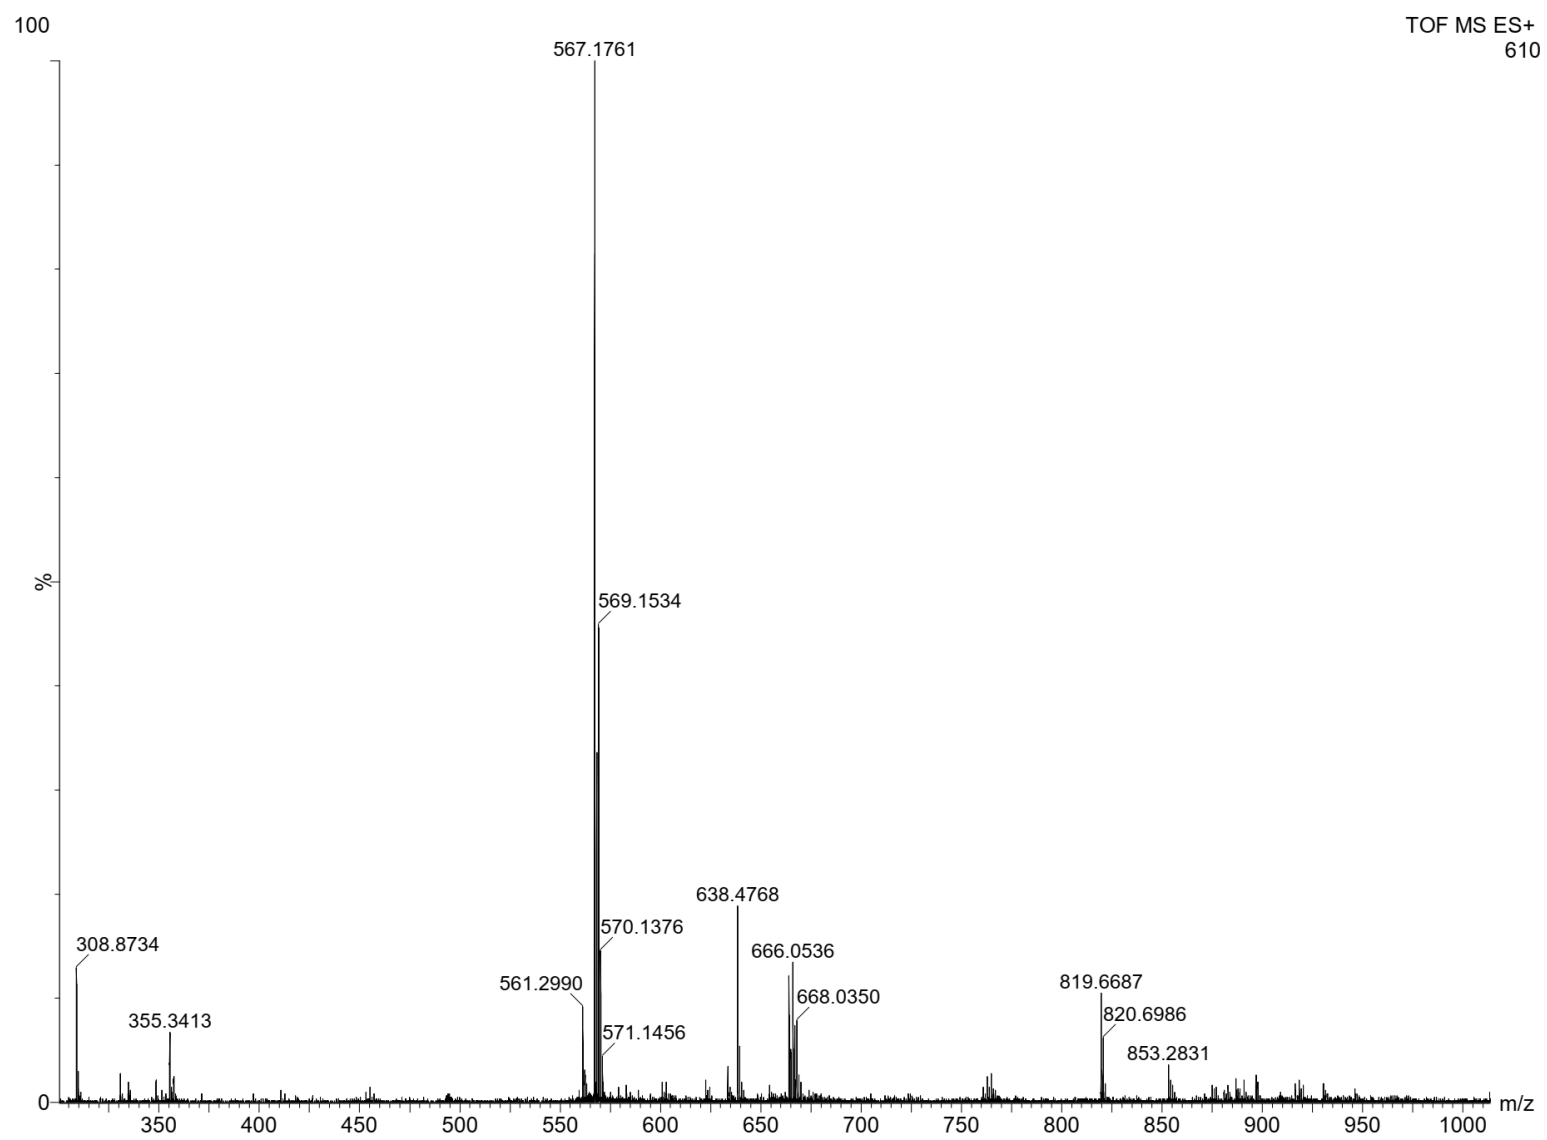

Figure S89. HRMS-ESI (Z)-5-methoxy-2-((7-methoxy-3-(4-methoxybenzoyl)-2H-benzo[b][1,4]oxazin-2-ylidene)amino)phenyl 4-methoxybenzoate (2m).

# Supporting Information

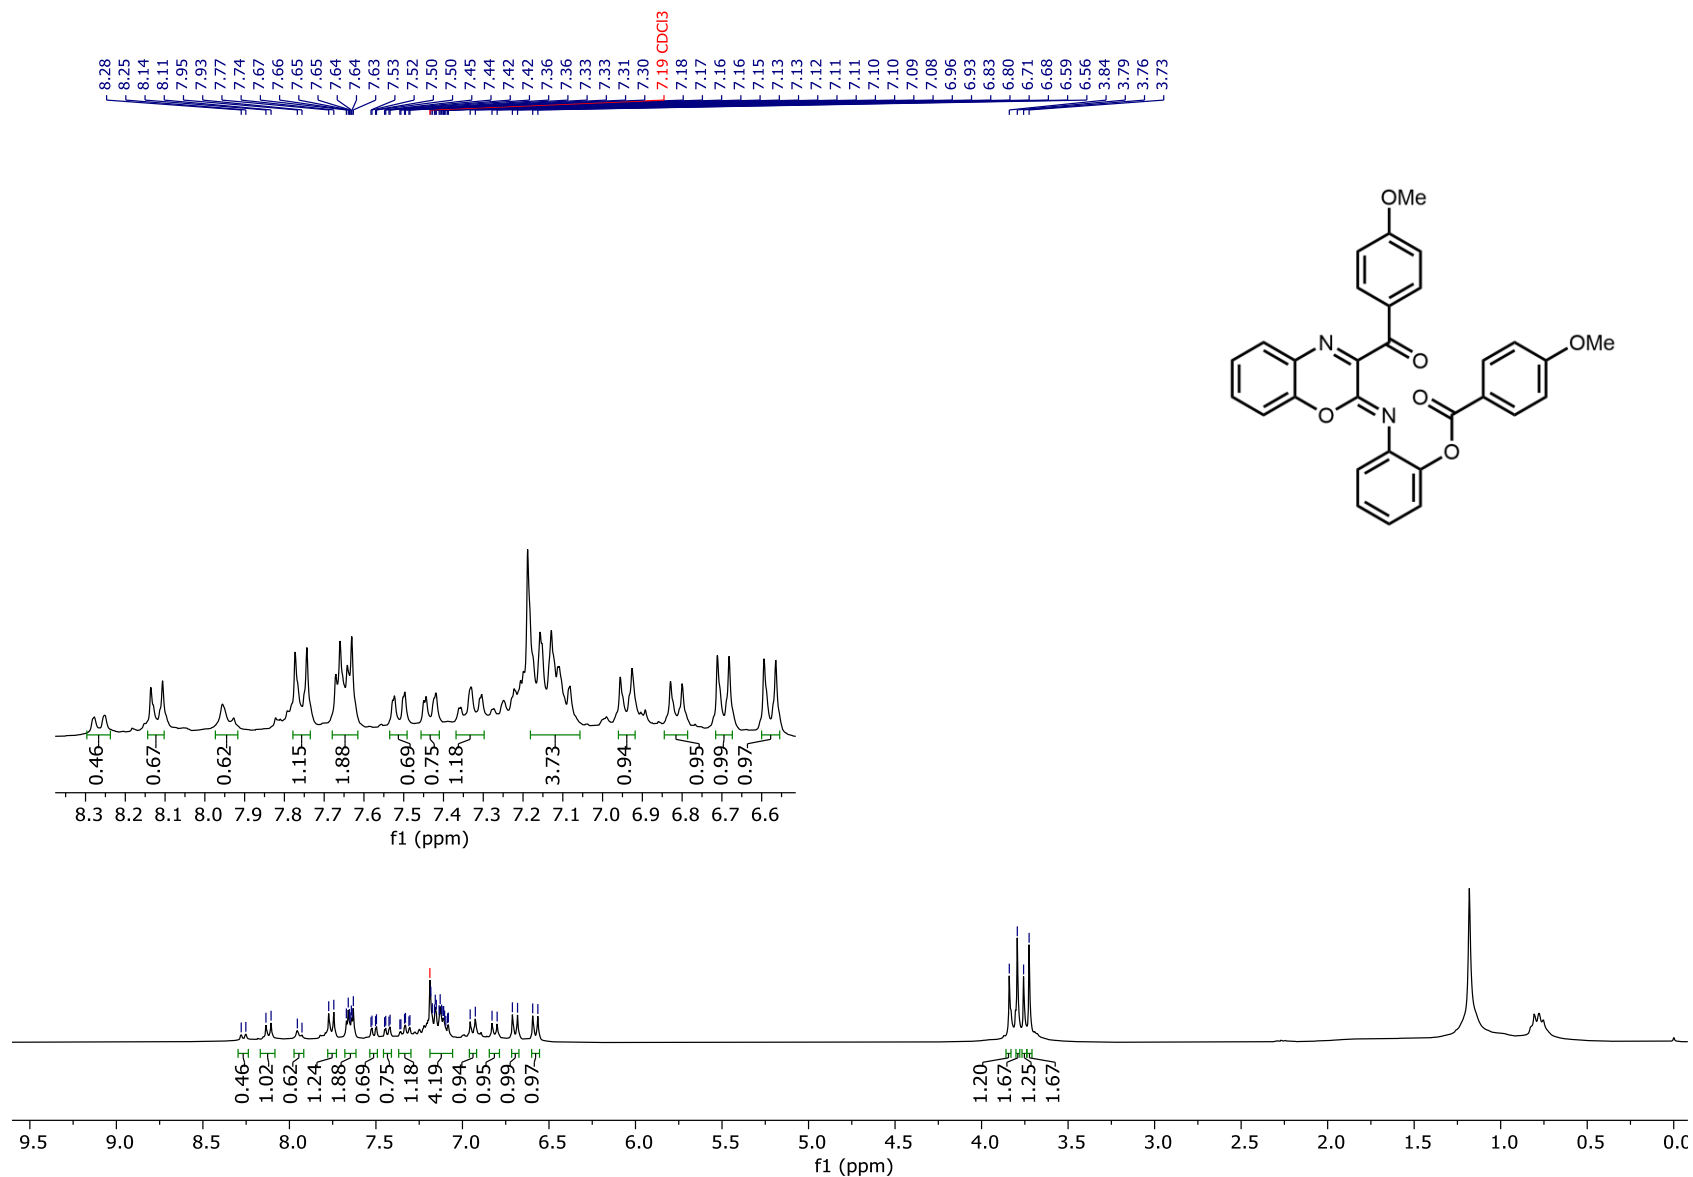

# Supporting Information

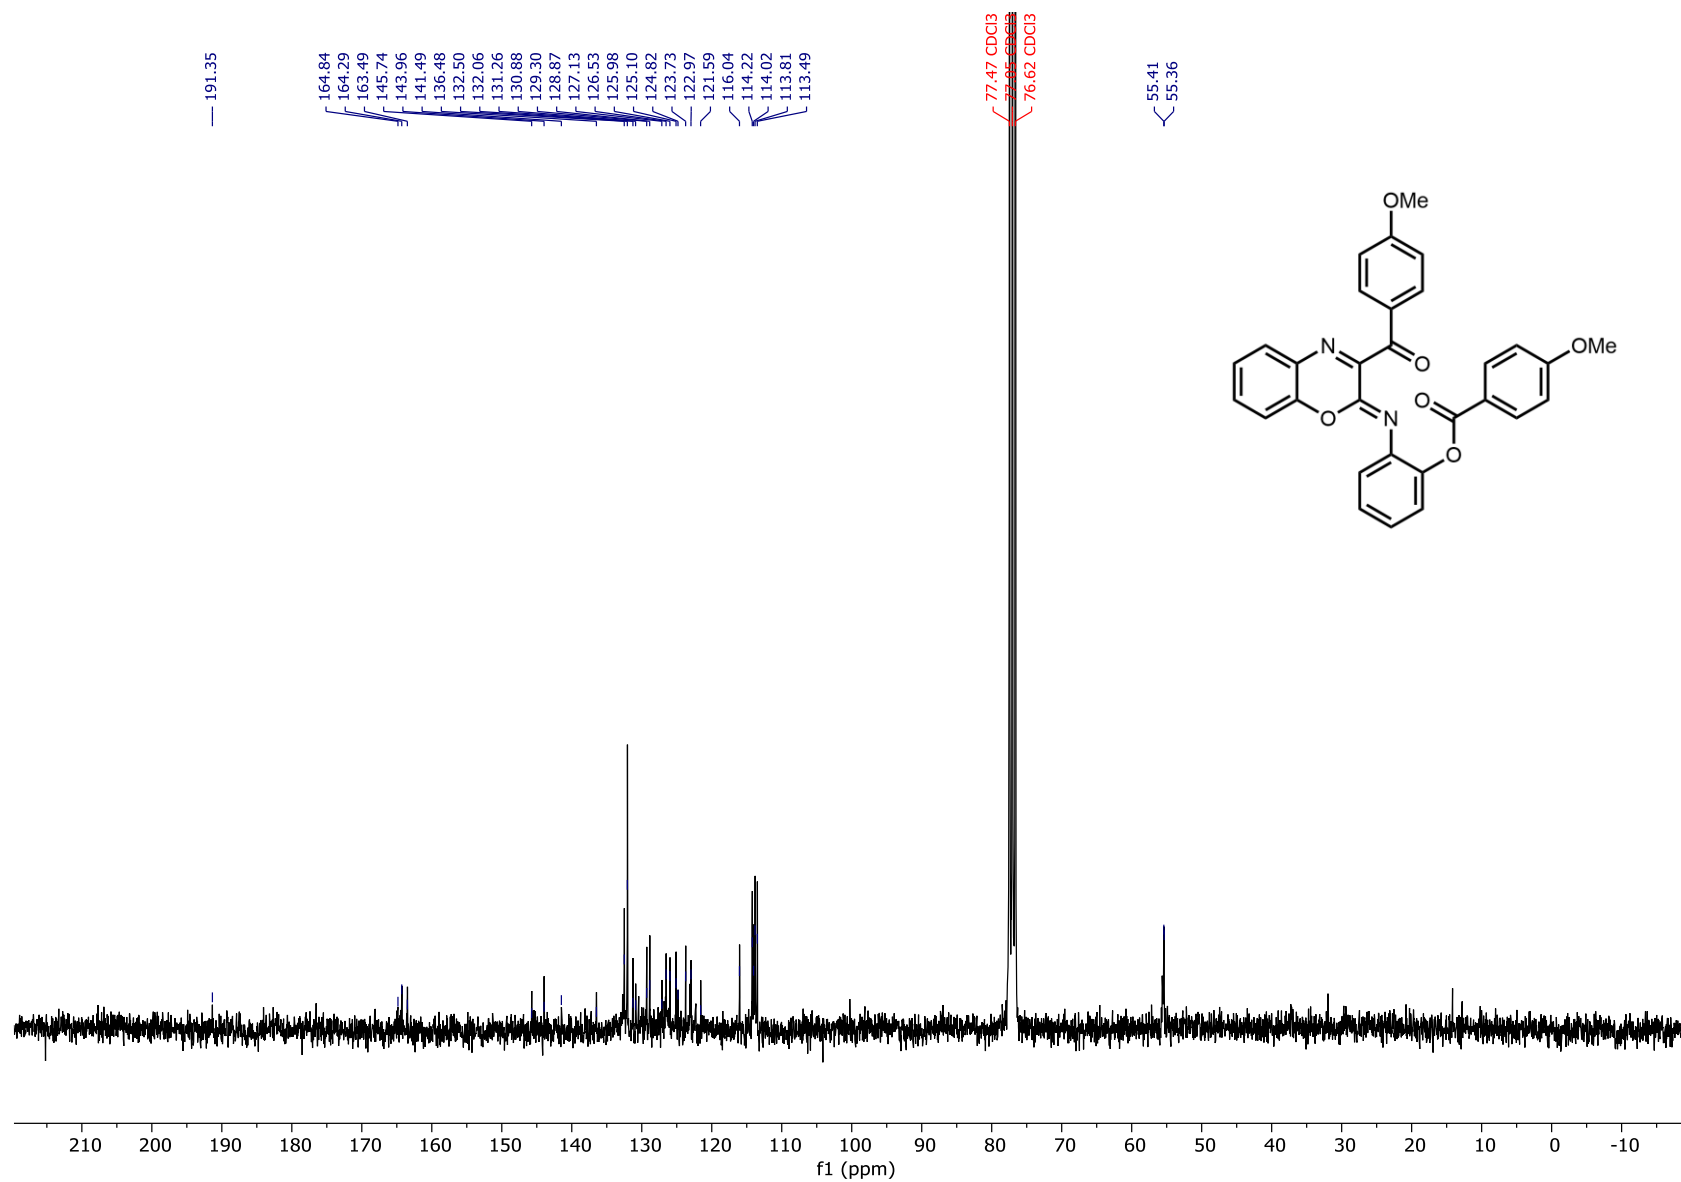

Figure S91. <sup>13</sup>C NMR (76 MHz, CDCl<sub>3</sub>) (Z)-2-((3-(4-methoxybenzoyl)-2H-benzo[b][1,4]oxazin-2-ylidene)amino)phenyl 4-methoxybenzoate (2n).

## Supporting Information

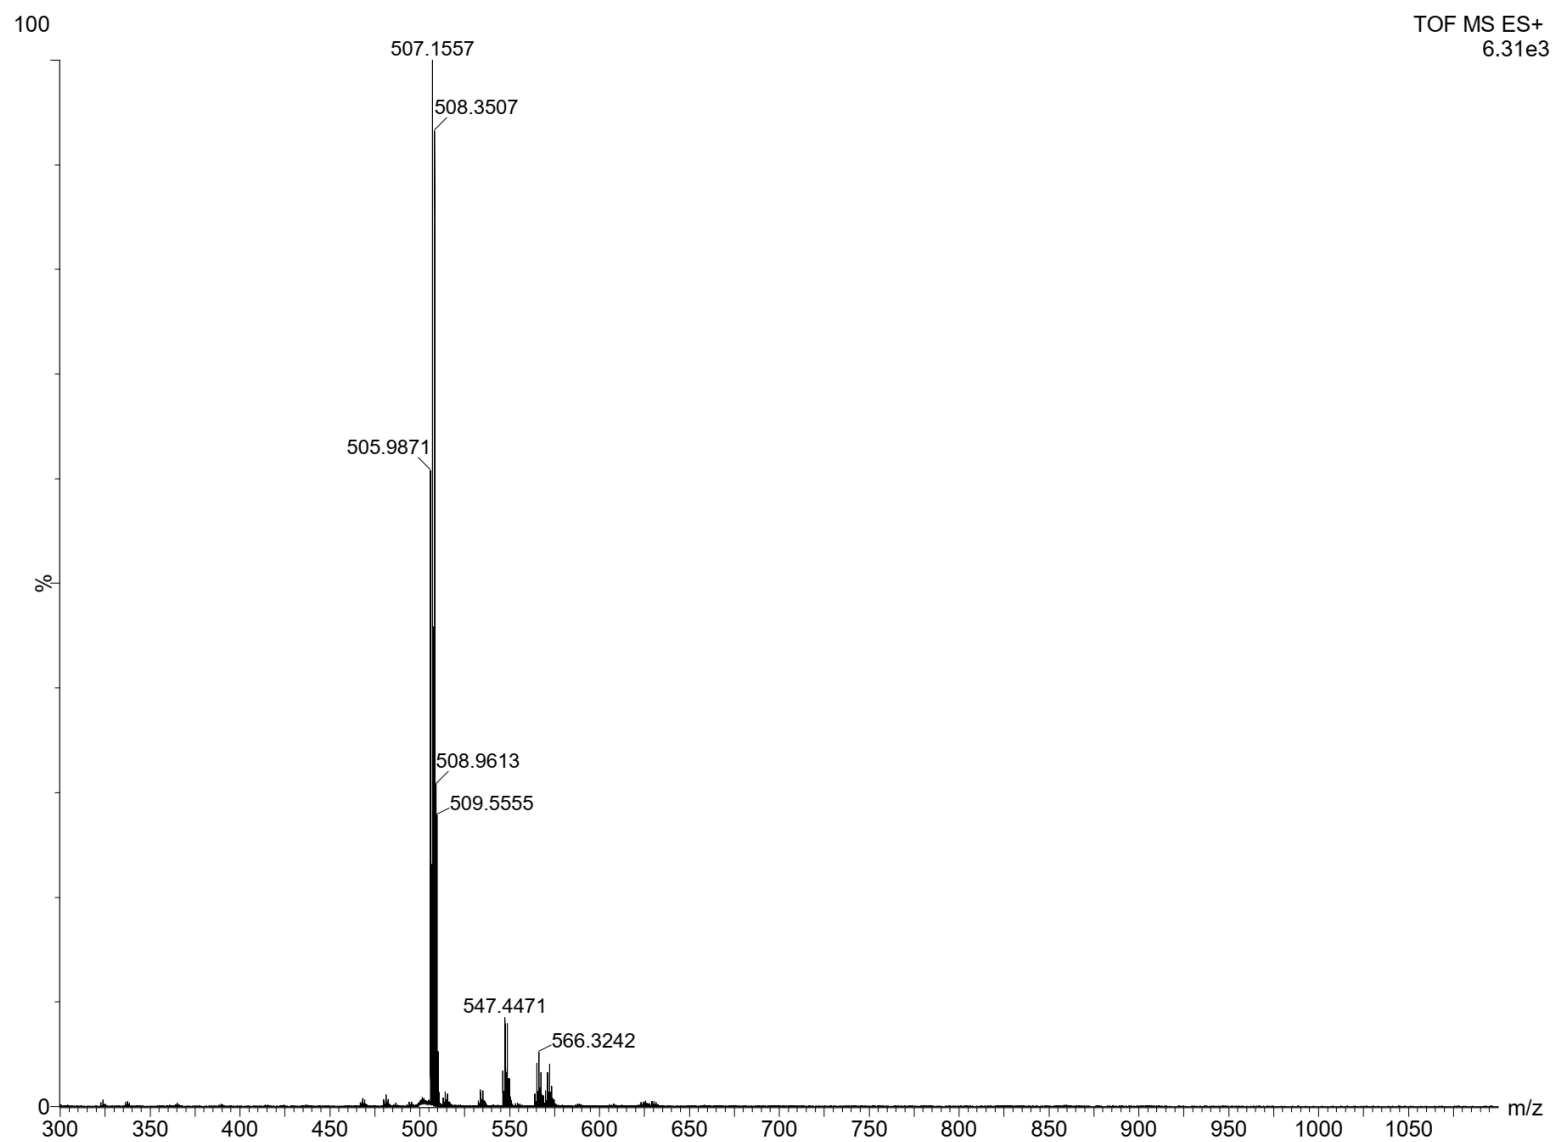

Figure S92. HRMS-ESI (Z)-2-((3-(4-methoxybenzoyl)-2H-benzo[b][1,4]oxazin-2-ylidene)amino)phenyl 4-methoxybenzoate (2n).



# Supporting Information

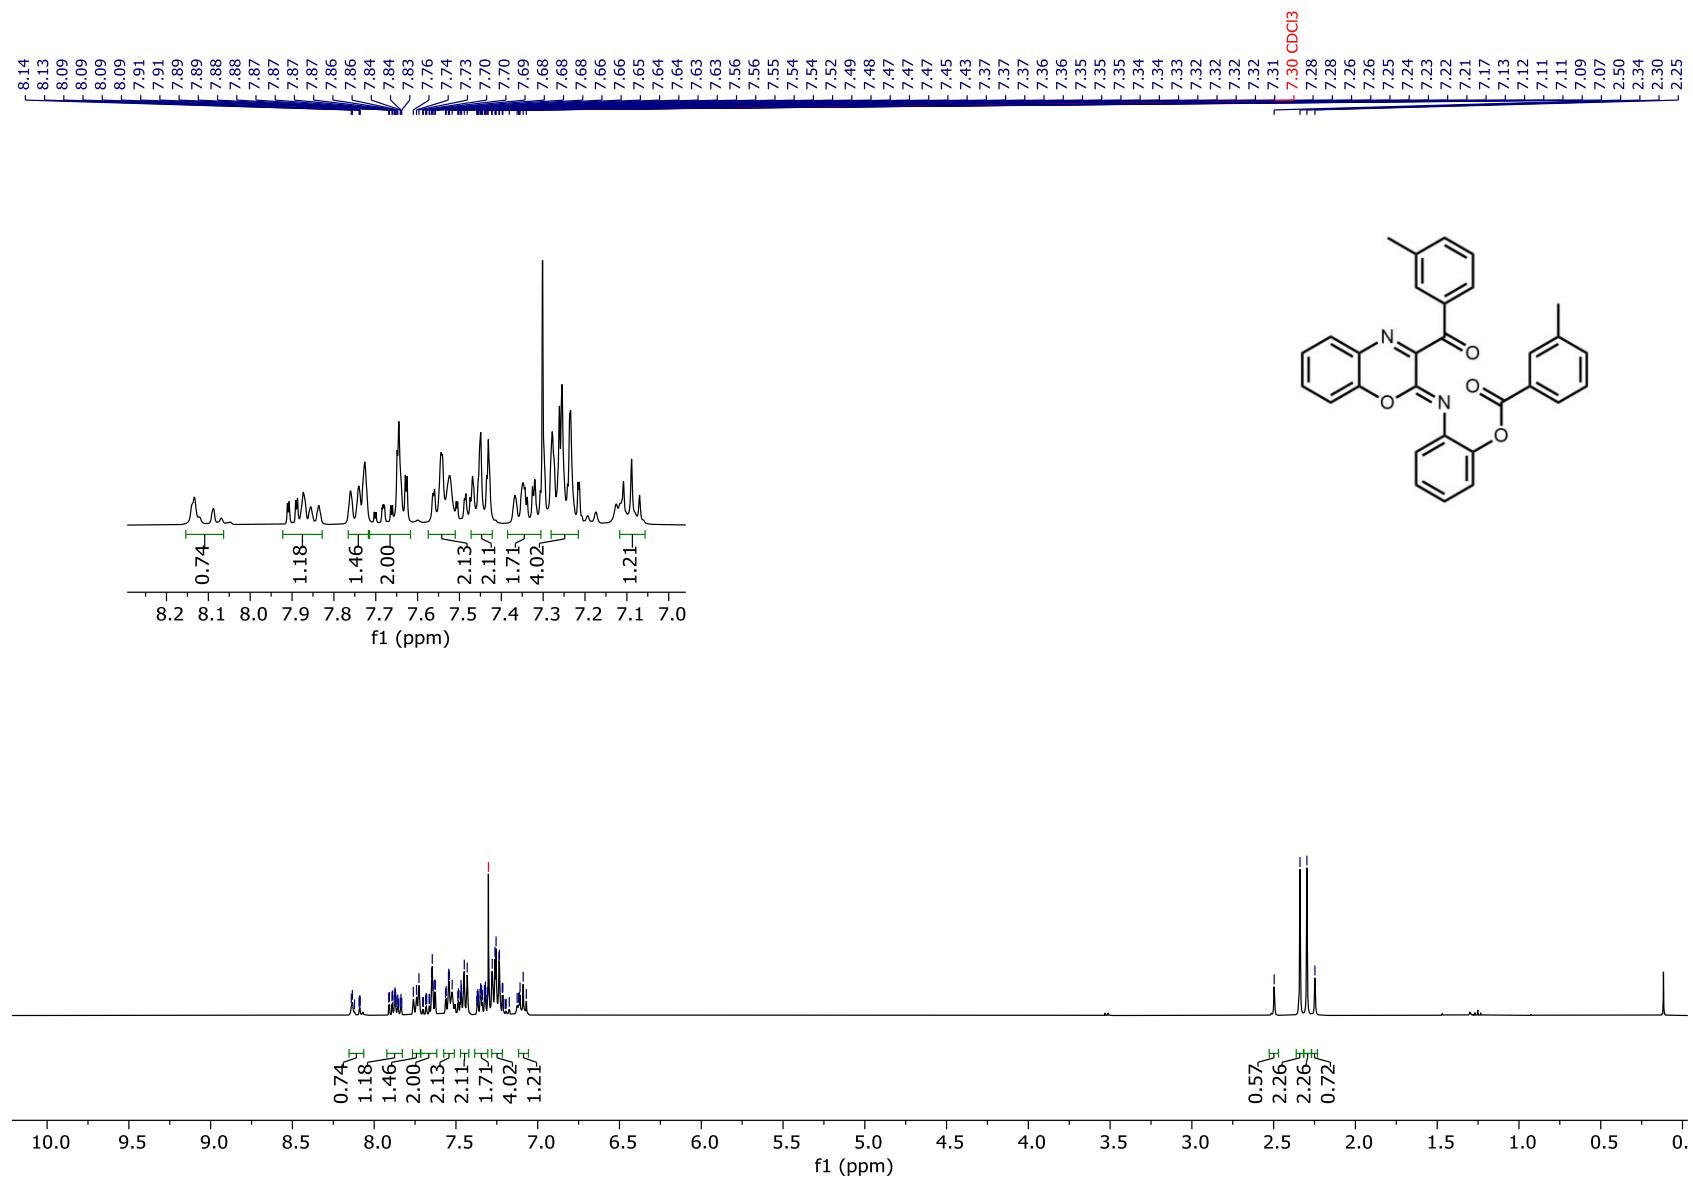

Figure S93. <sup>1</sup>H NMR (400 MHz, CDCl<sub>3</sub>) (Z)-2-((3-(3-methylbenzoyl)-2H-benzo[b][1,4]oxazin-2-ylidene)amino)phenyl 3-methylbenzoate (2o).

# Supporting Information

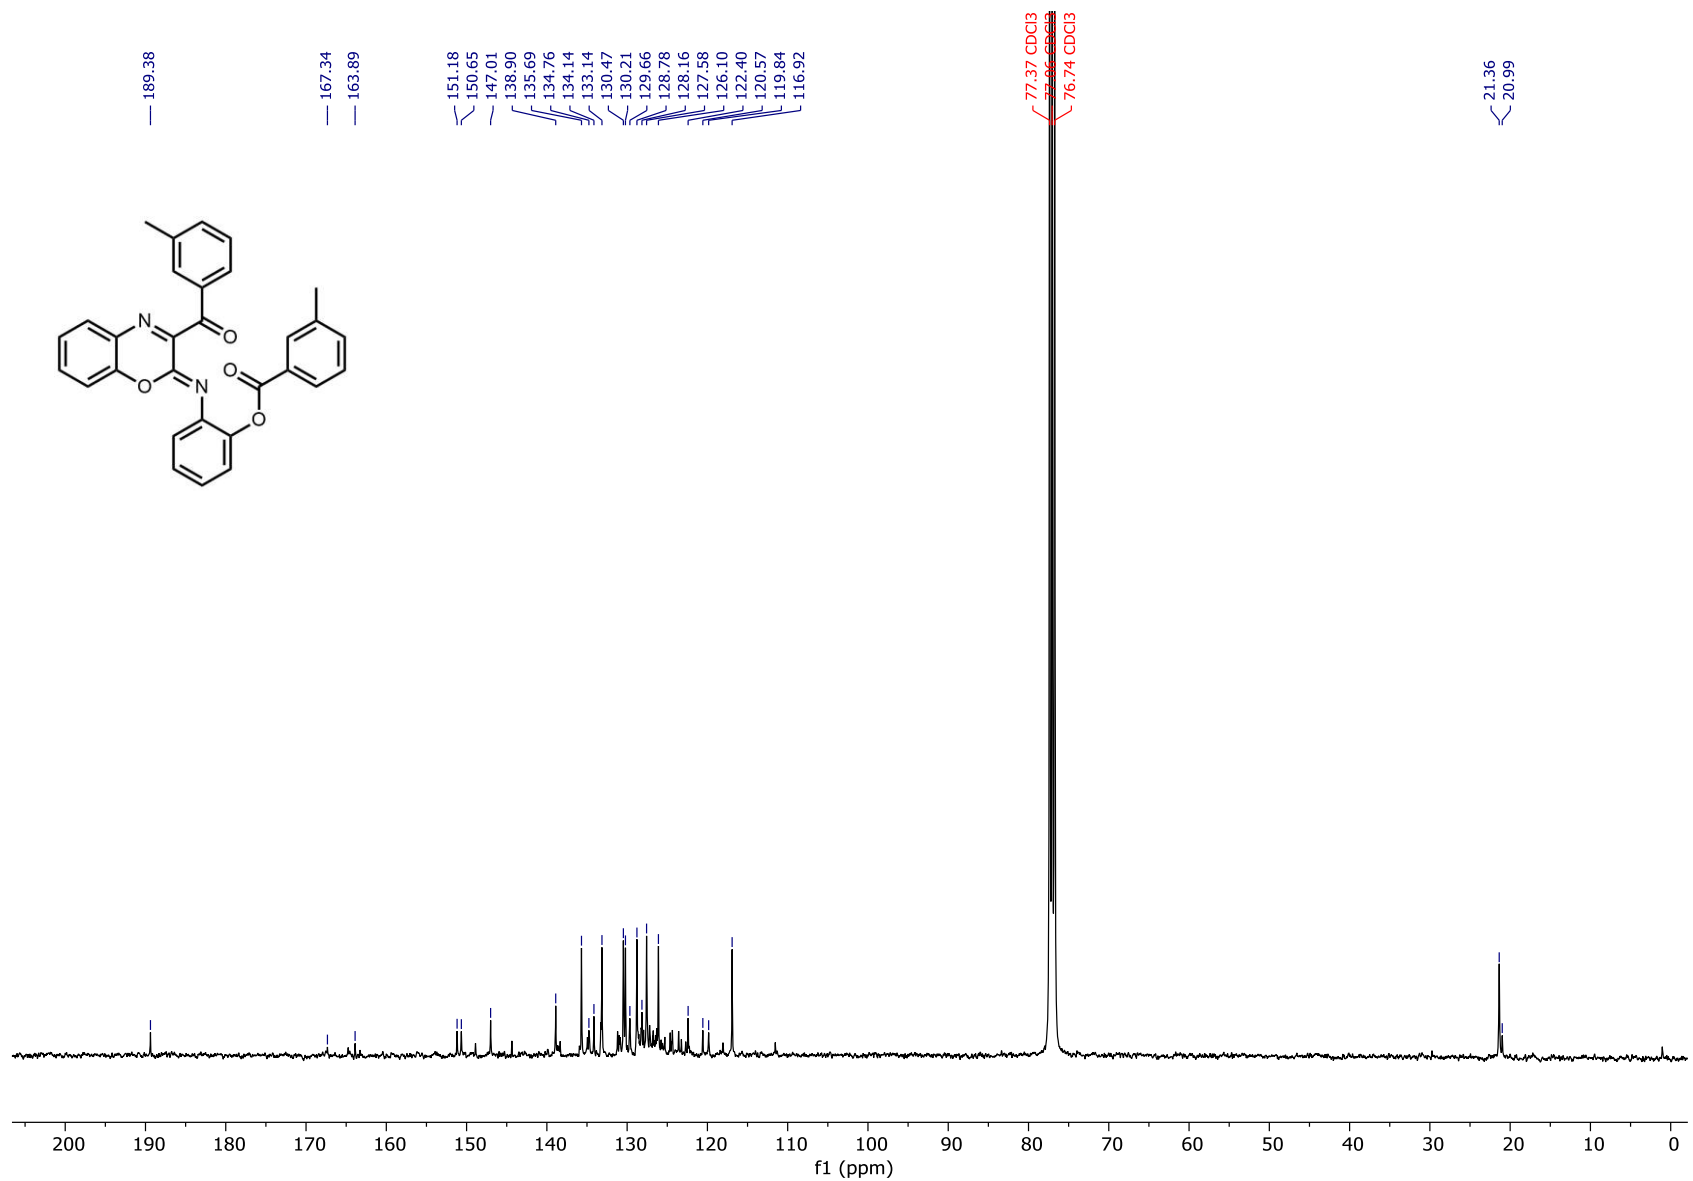

Figure S94. <sup>13</sup>C NMR (101 MHz, CDCl<sub>3</sub>) (Z)-2-((3-(3-methylbenzoyl)-2H-benzo[b][1,4]oxazin-2-ylidene)amino)phenyl 3-methylbenzoate (2o).

## Supporting Information

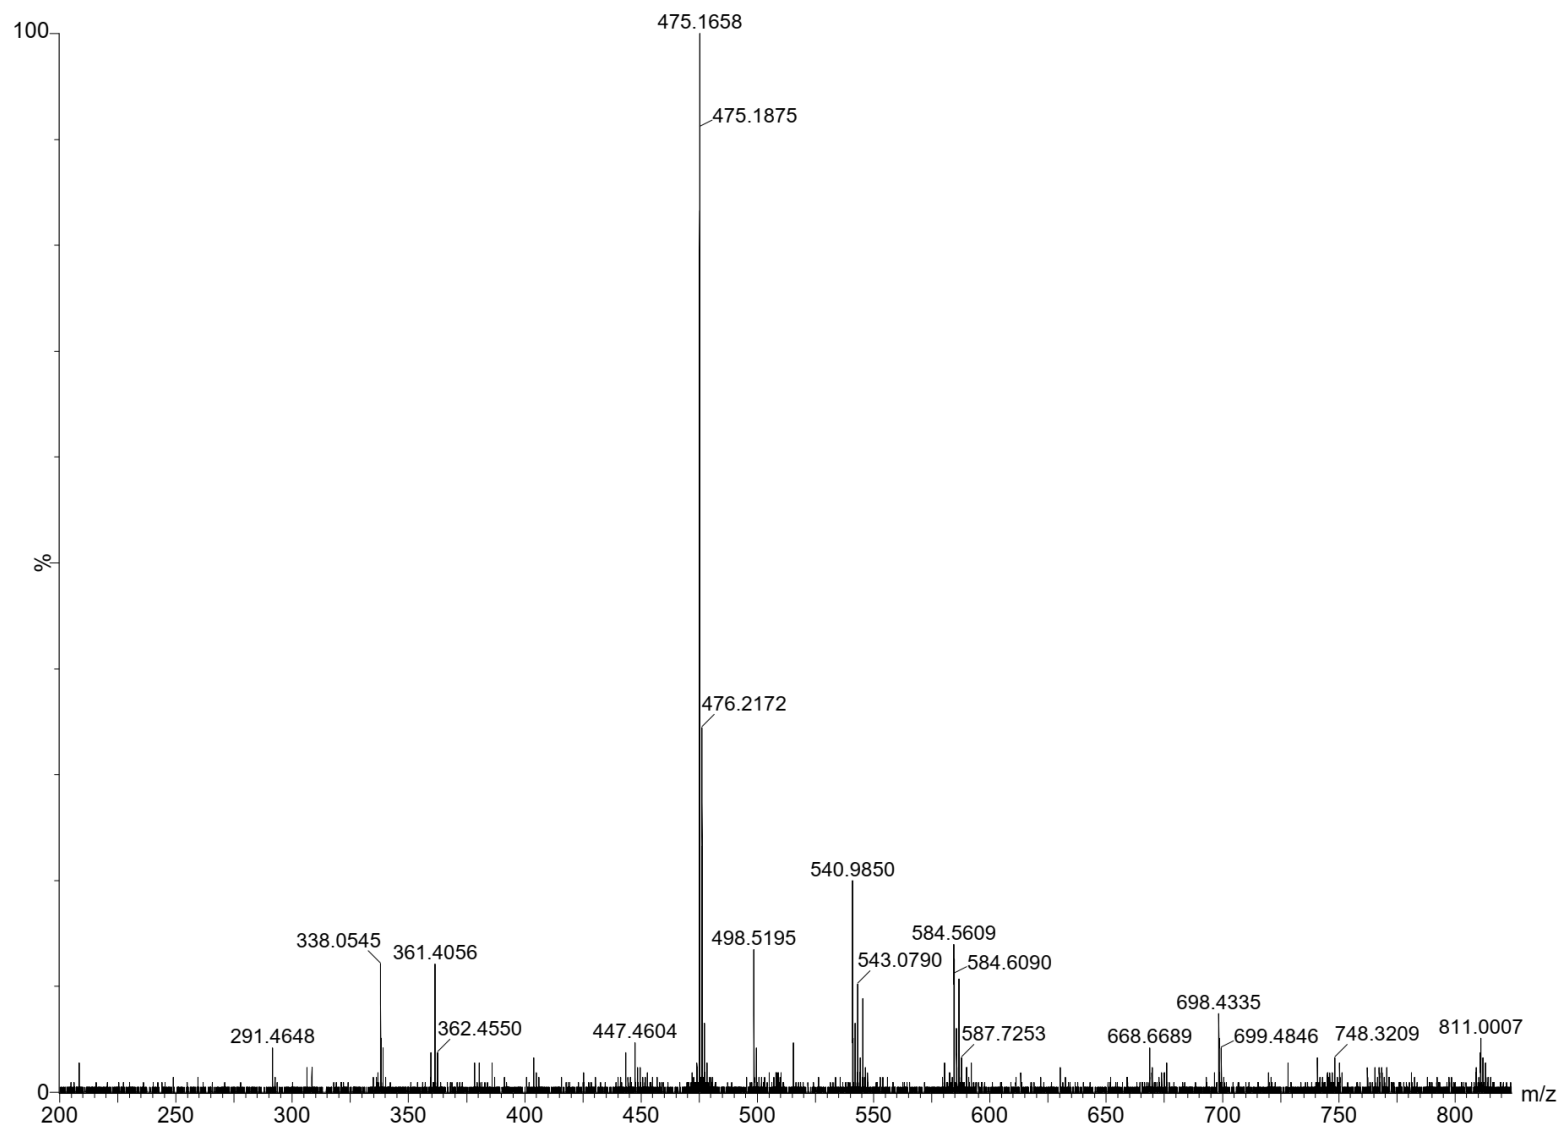

Figure S95. HRMS-ESI (Z)-2-((3-(3-methylbenzoyl)-2H-benzo[b][1,4]oxazin-2-ylidene)amino)phenyl 3-methylbenzoate (20).

# Supporting Information

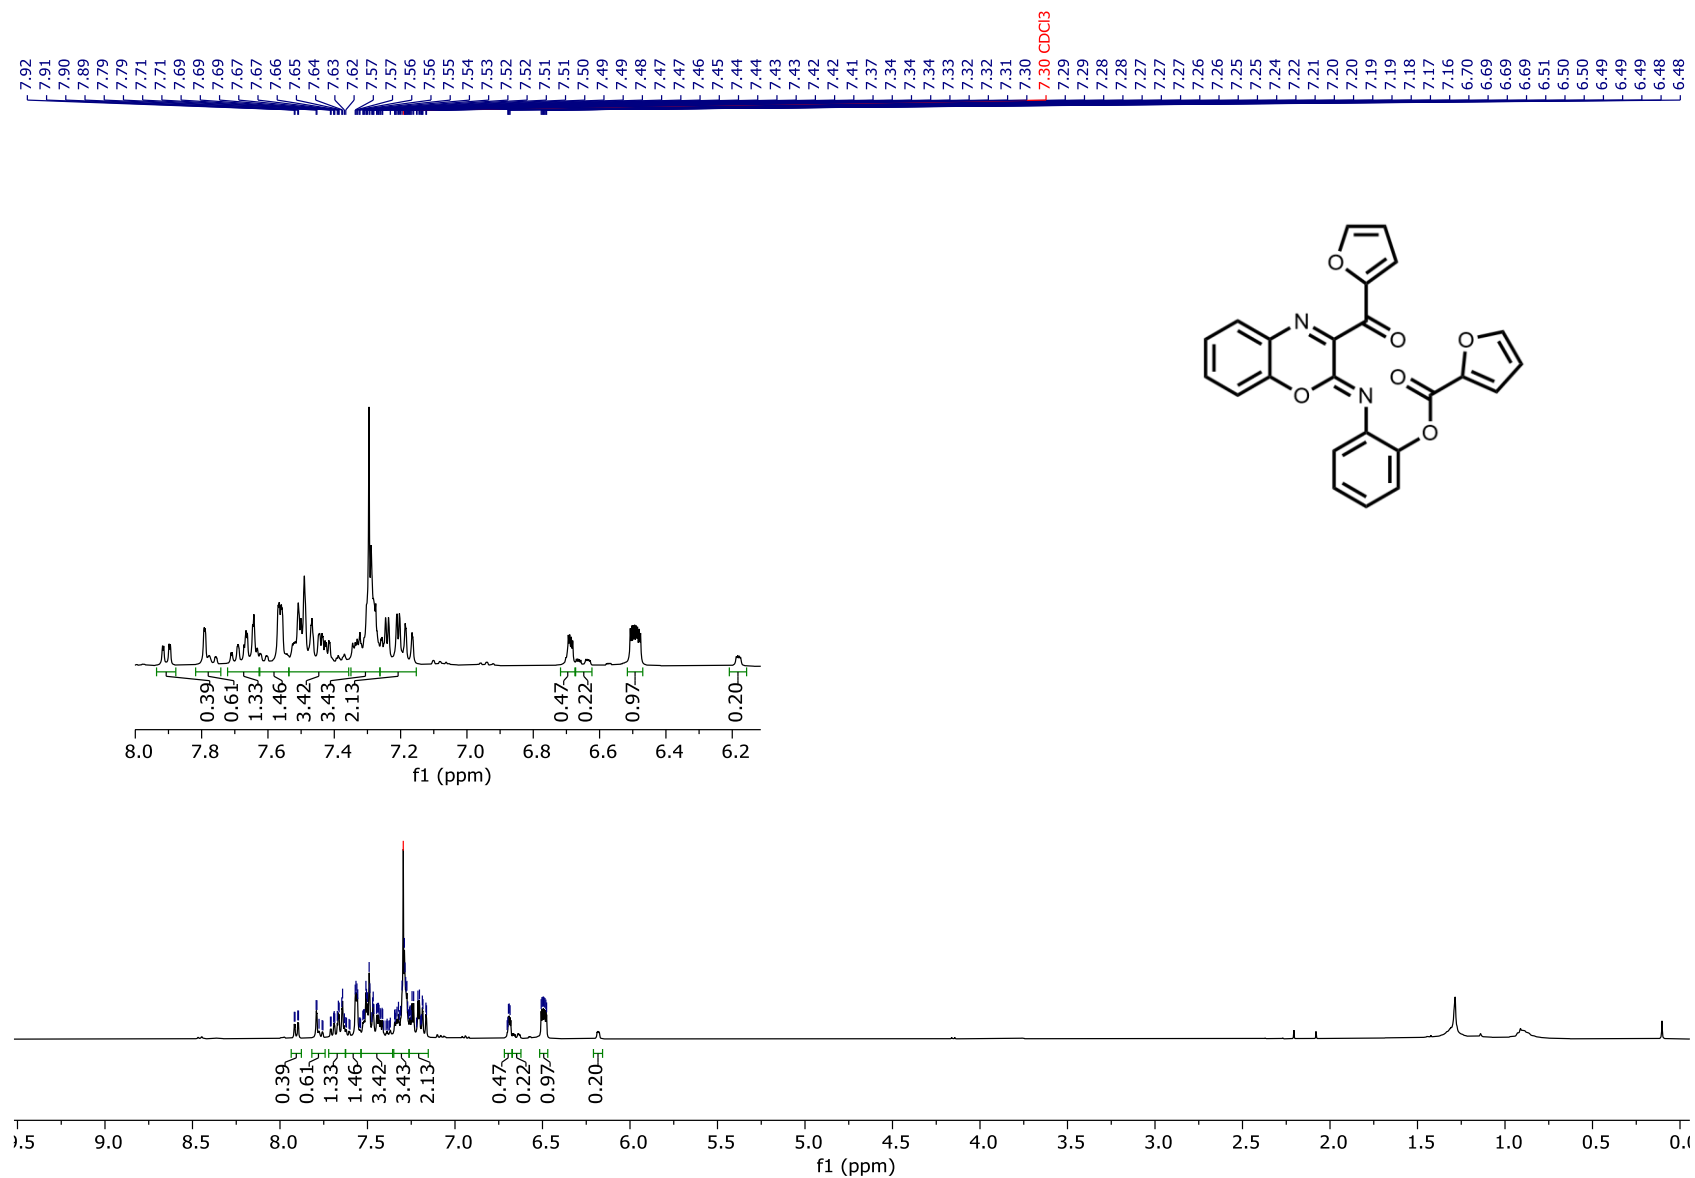

# Supporting Information

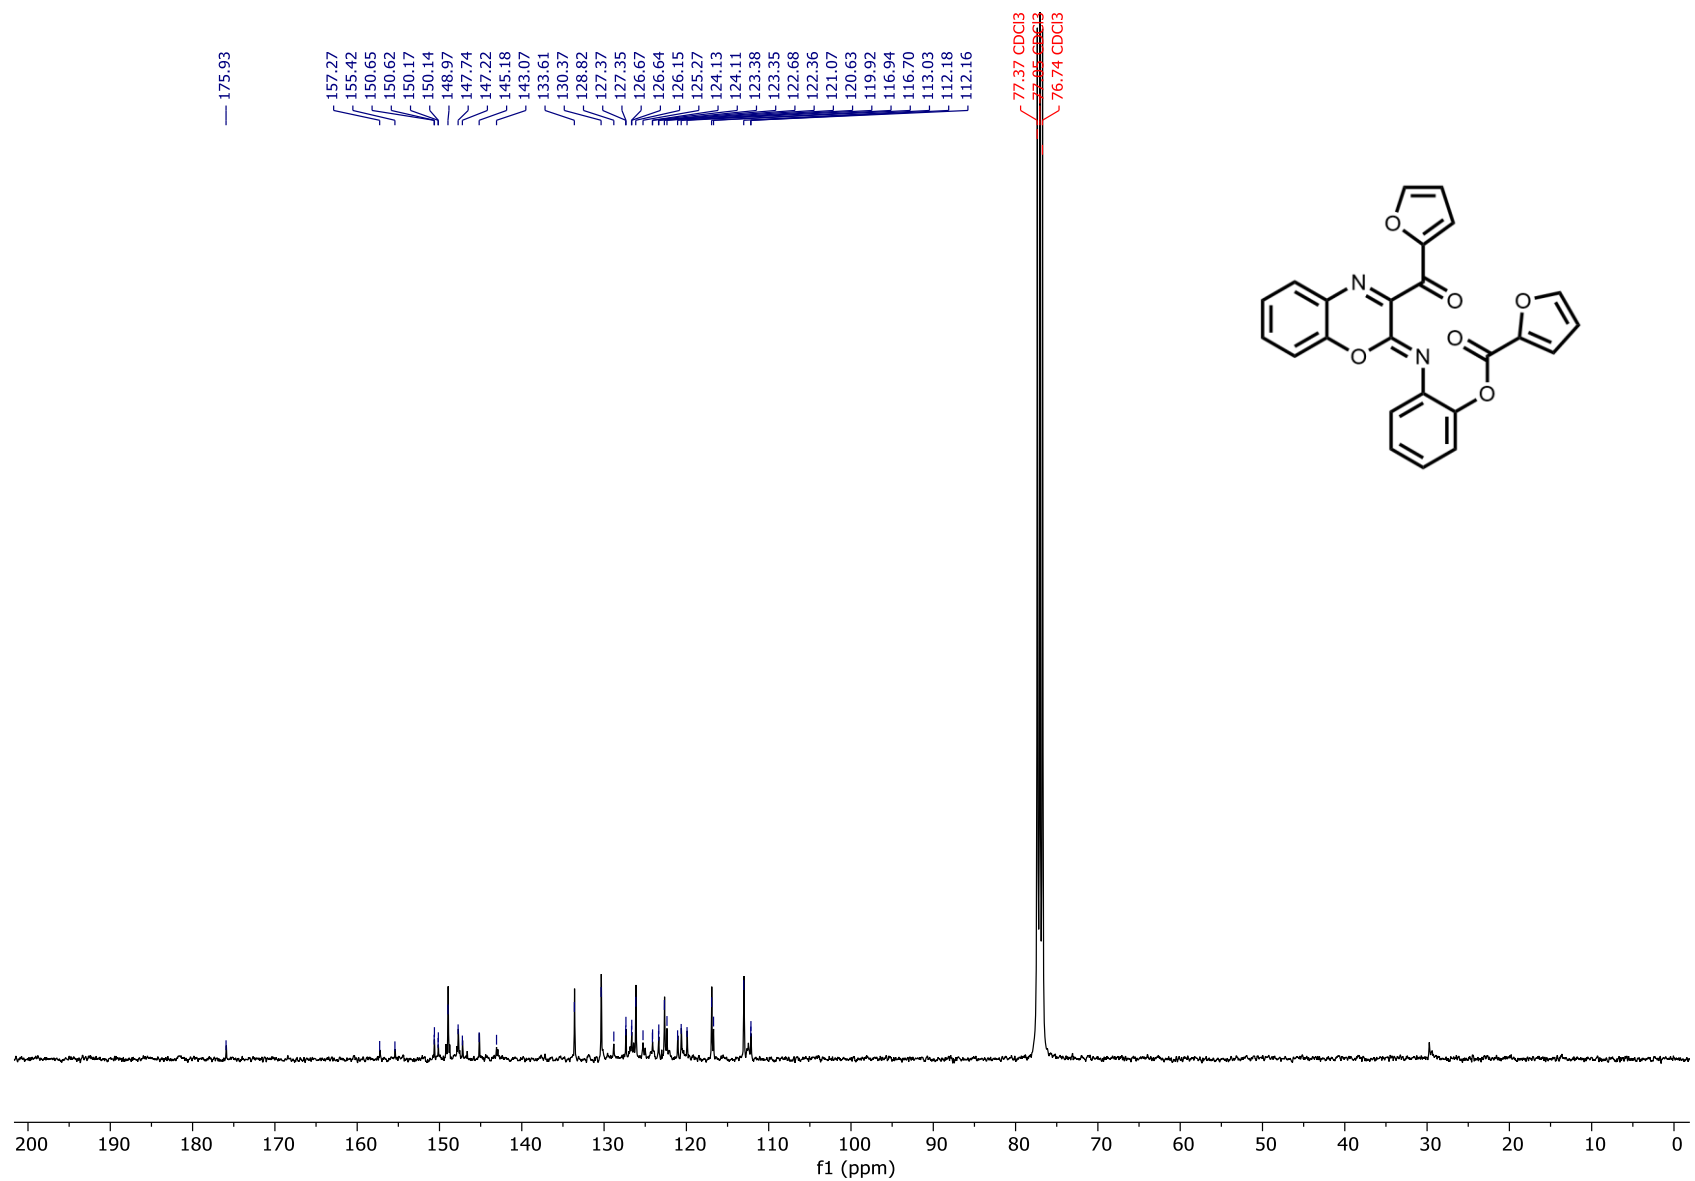

Figure S97. <sup>13</sup>C NMR (101 MHz, CDCl<sub>3</sub>) (Z)-2-((3-(furan-2-carbonyl)-2H-benzo[b][1,4]oxazin-2-ylidene)amino)phenyl furan-2-carboxylate (2p).

# Supporting Information

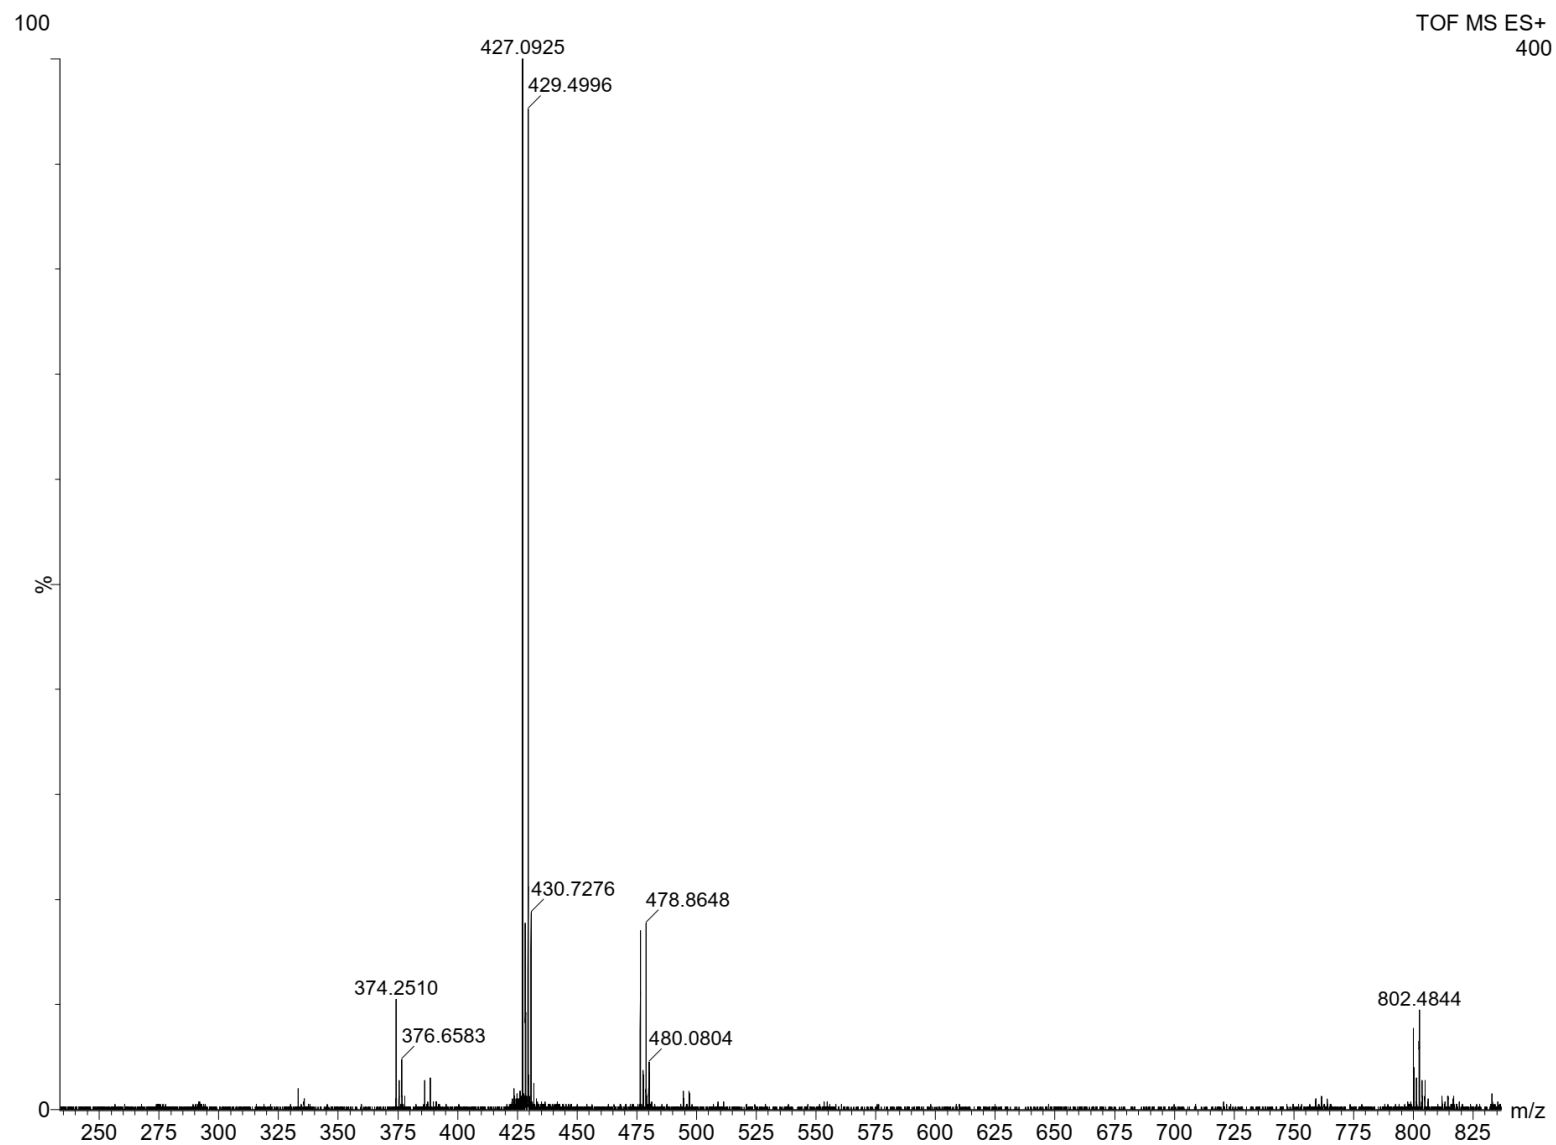

Figure S98. HRMS-ESI (Z)-2-((3-(furan-2-carbonyl)-2H-benzo[b][1,4]oxazin-2-ylidene)amino)phenyl furan-2-carboxylate (2p).

# Supporting Information

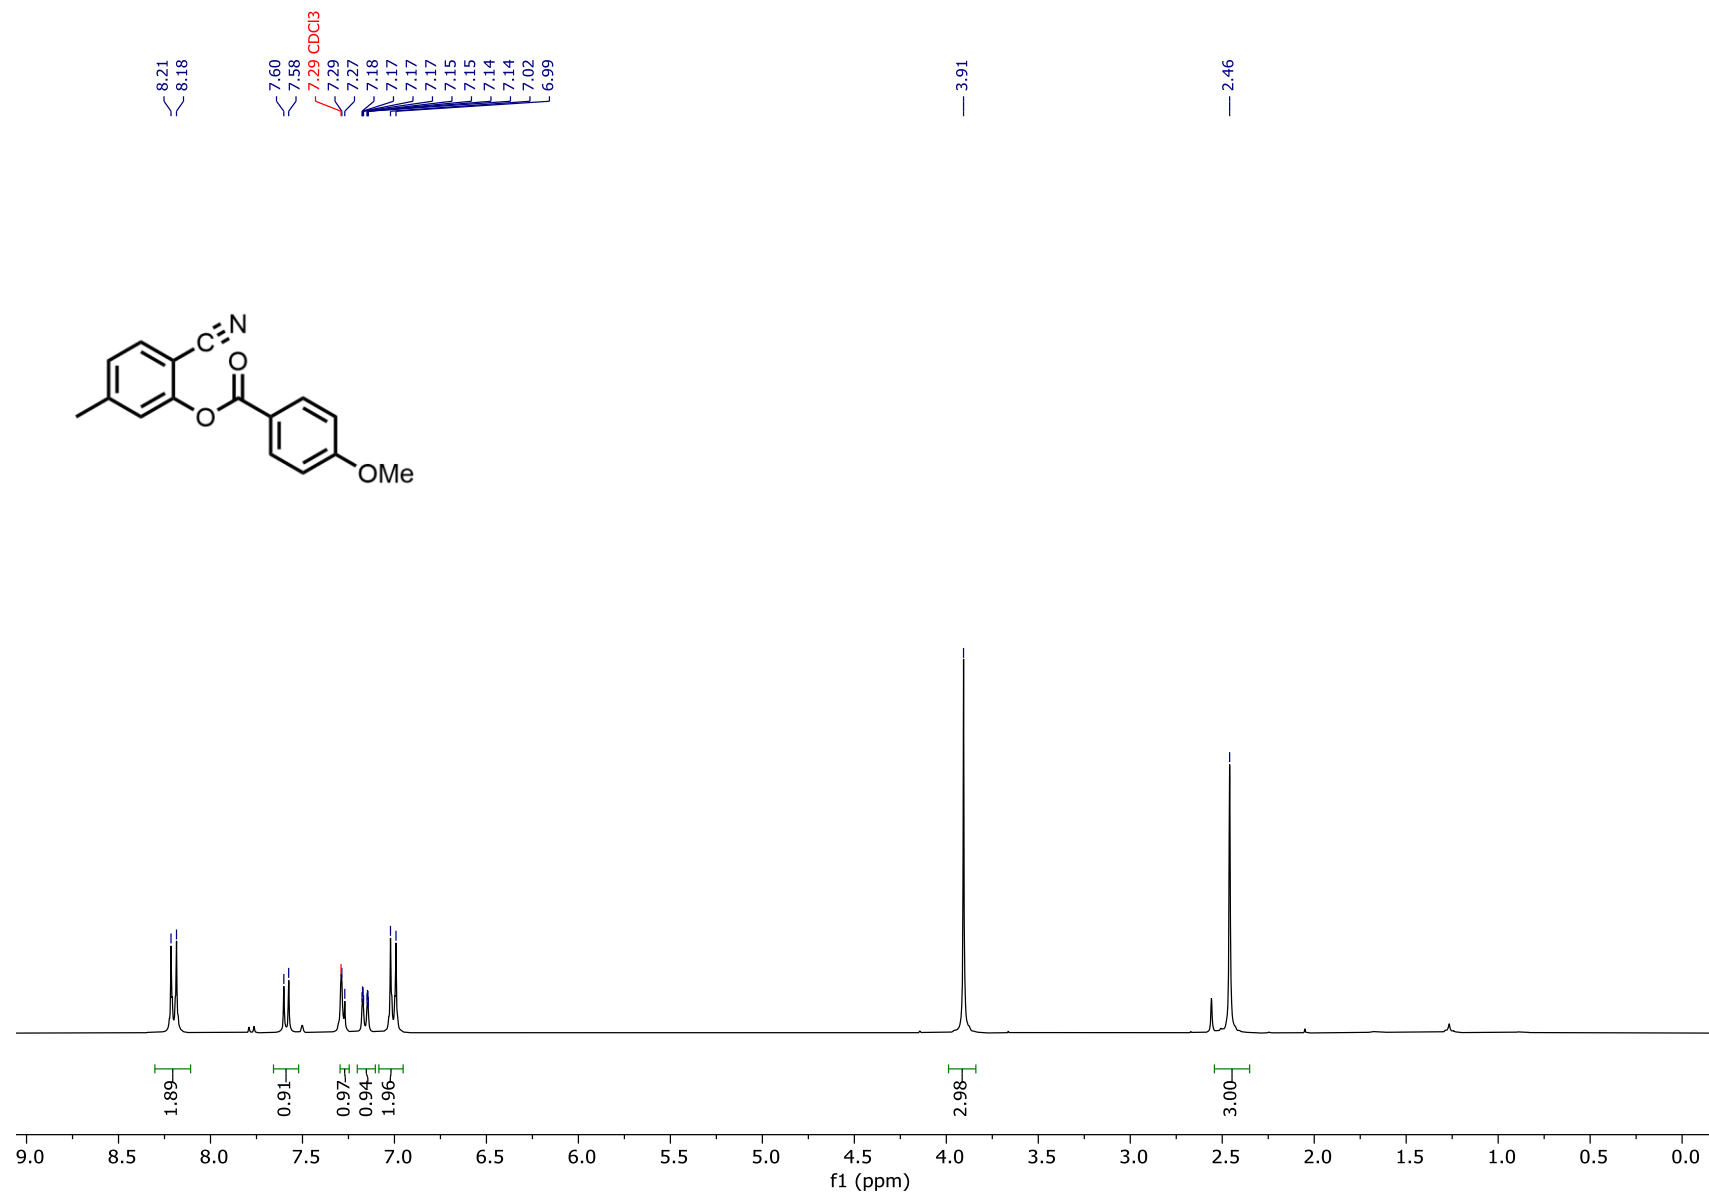

Figure S99. <sup>1</sup>H NMR (300 MHz, CDCl<sub>3</sub>) 2-cyano-5-methylphenyl 4-methoxybenzoate (3b).

# Supporting Information

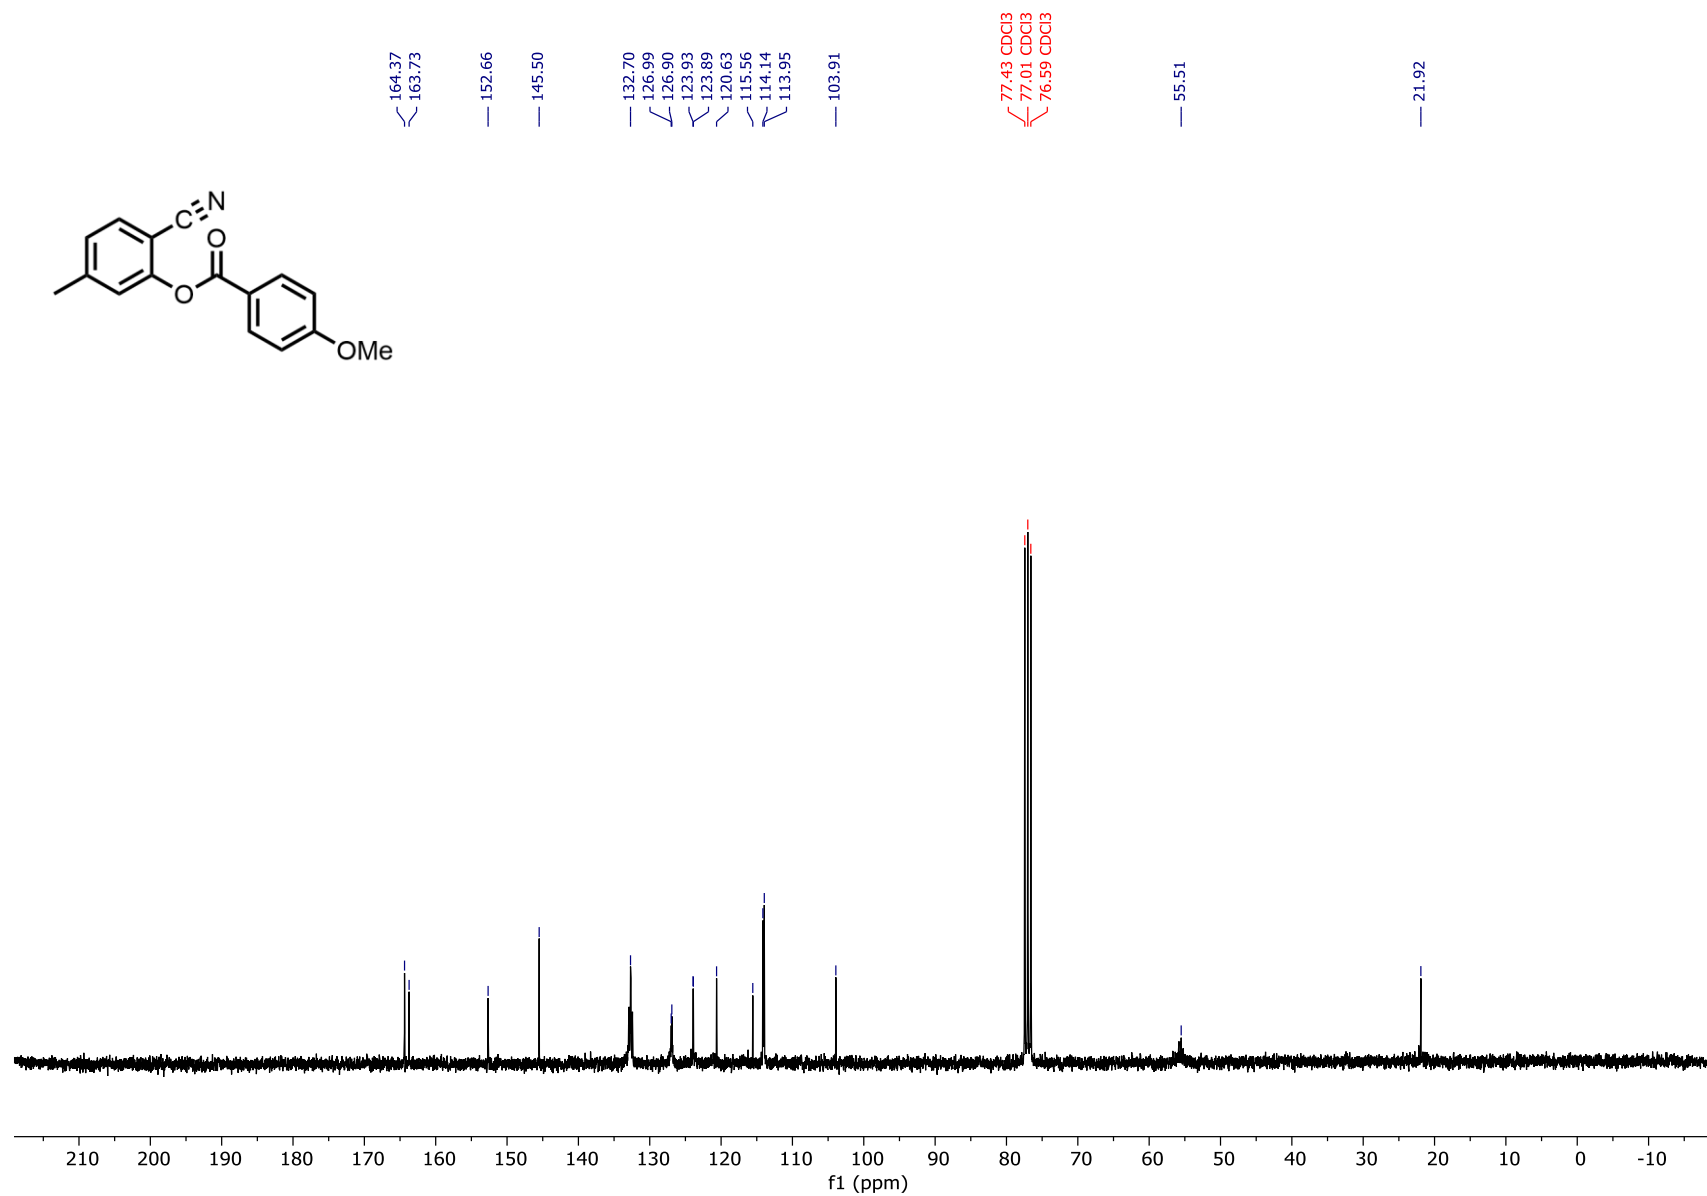

Figure S100. <sup>13</sup>C NMR (75 MHz, CDCl<sub>3</sub>) 2-cyano-5-methylphenyl 4-methoxybenzoate (3b).



# Supporting Information

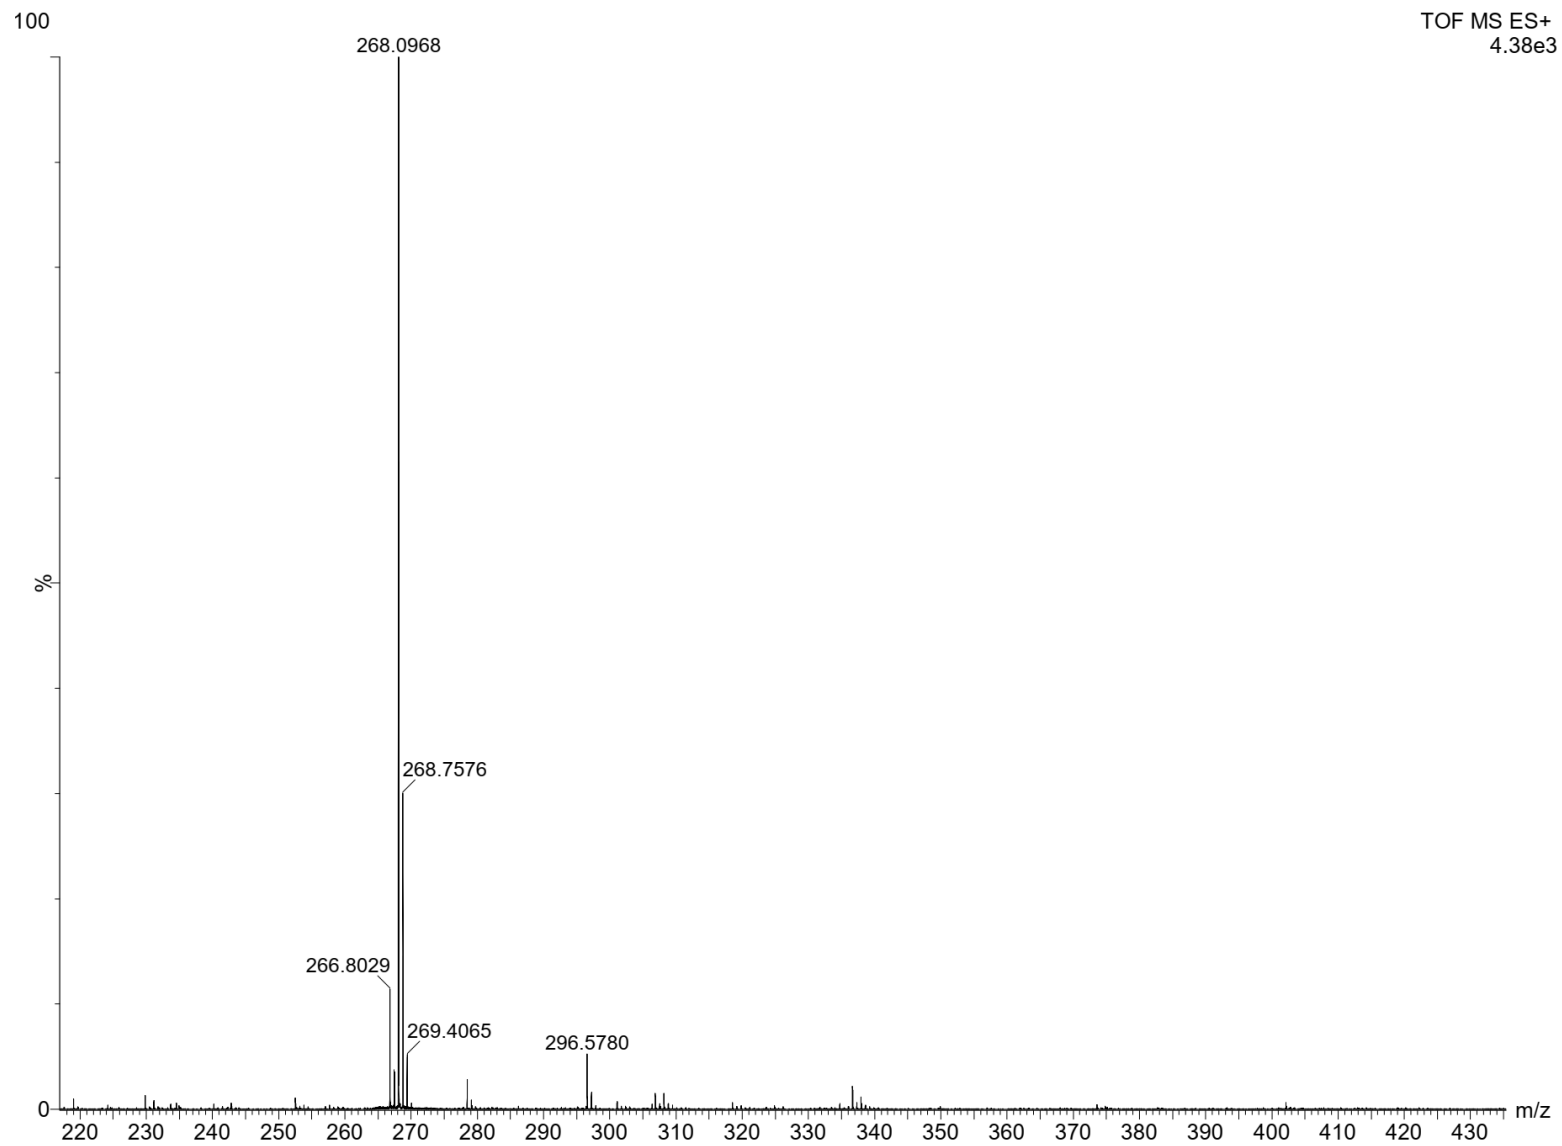

Figure S101. HRMS-ESI 2-cyano-5-methylphenyl 4-methoxybenzoate (3b).

# Supporting Information

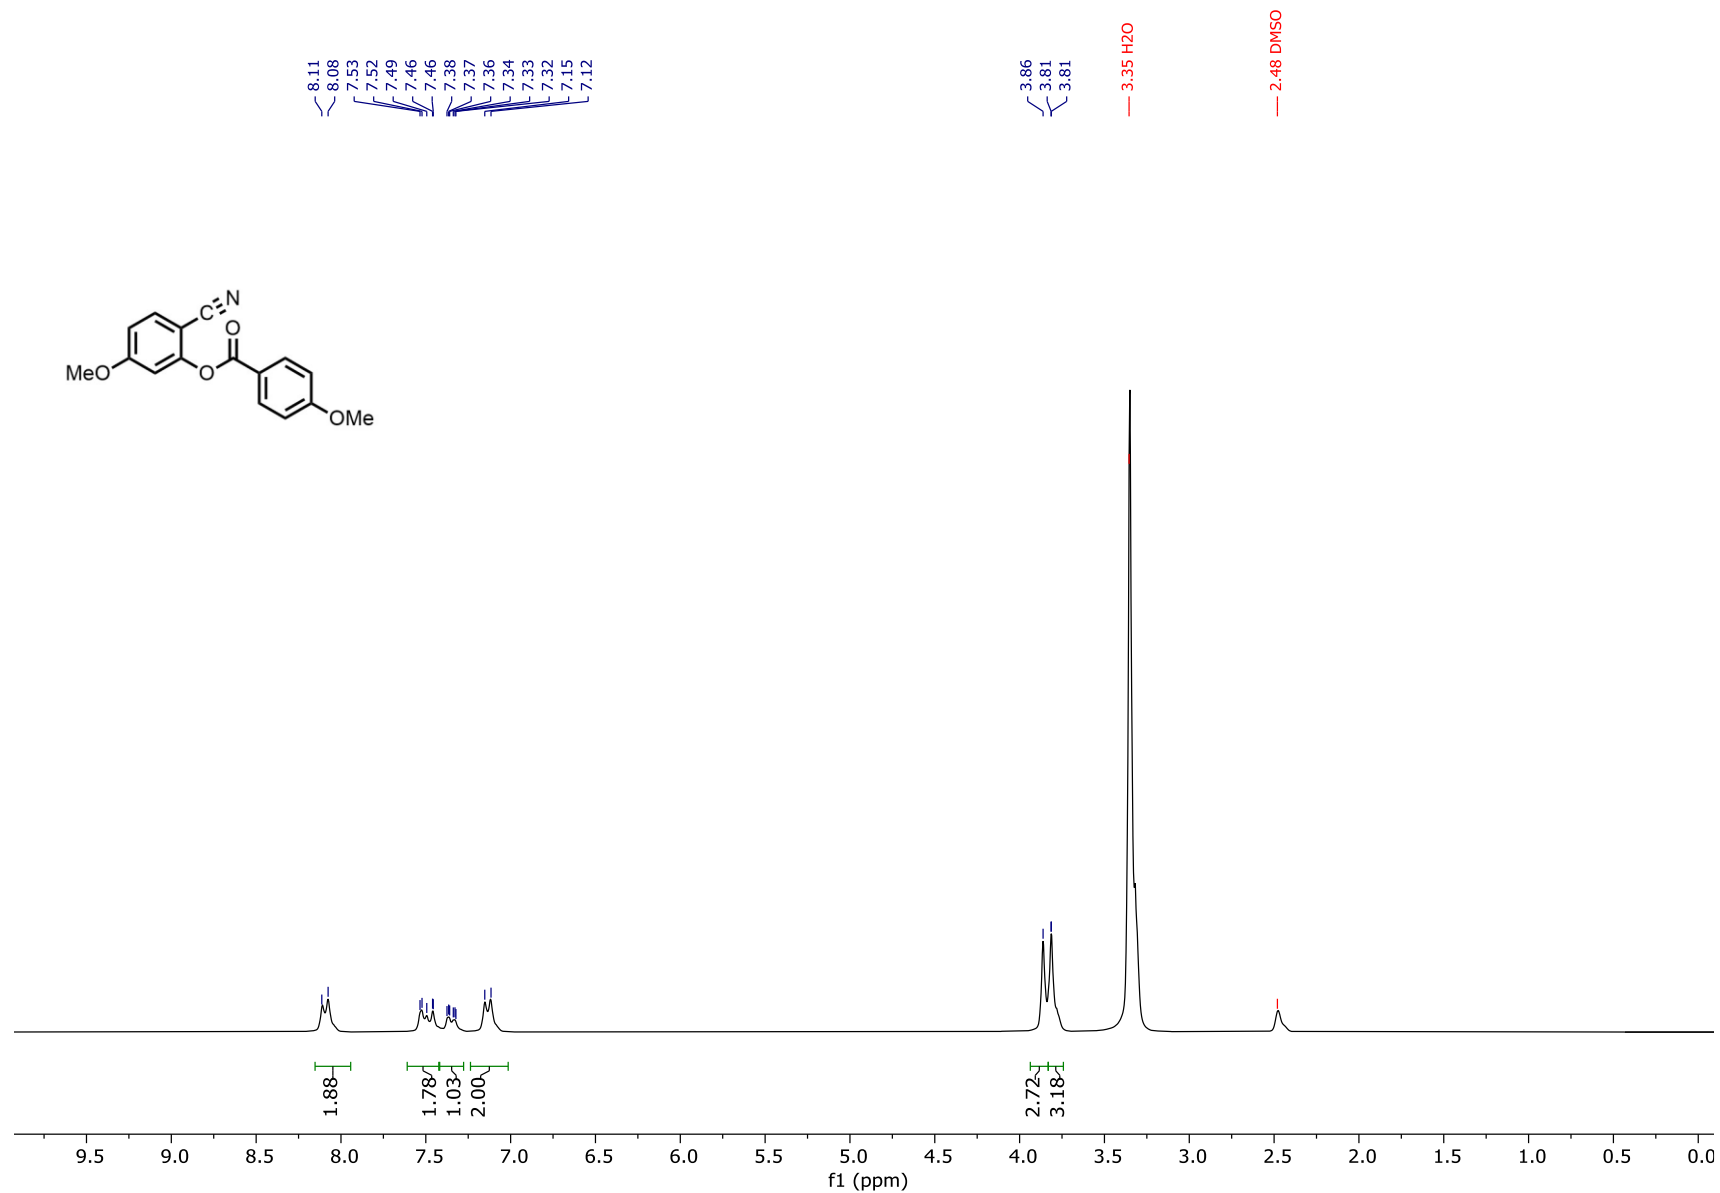

Figure S102. <sup>1</sup>H NMR (250 MHz, DMSO) 2-cyano-5-methoxyphenyl 4-methoxybenzoate (3m).

# Supporting Information

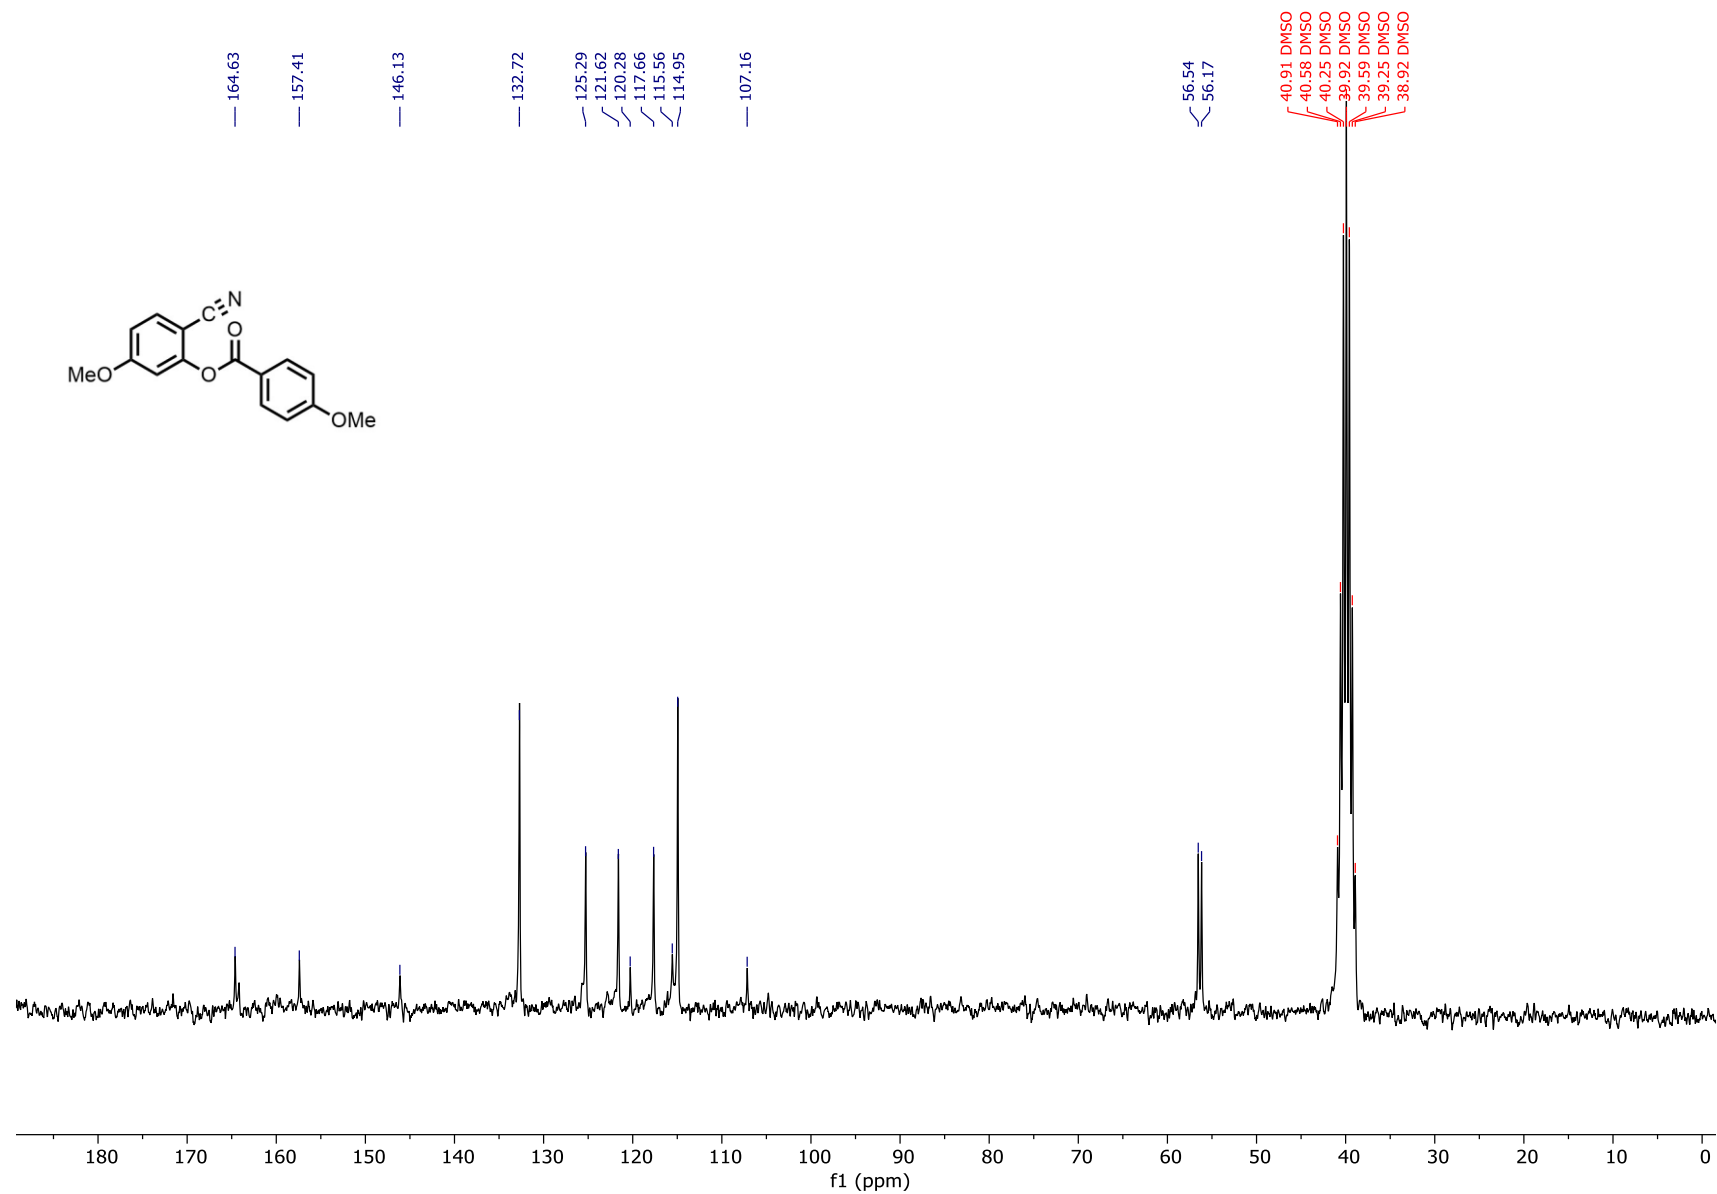

Figure S103.  $^{13}\text{C}$  NMR (63 MHz, DMSO) 2-cyano-5-methoxyphenyl 4-methoxybenzoate (3m).

# Supporting Information

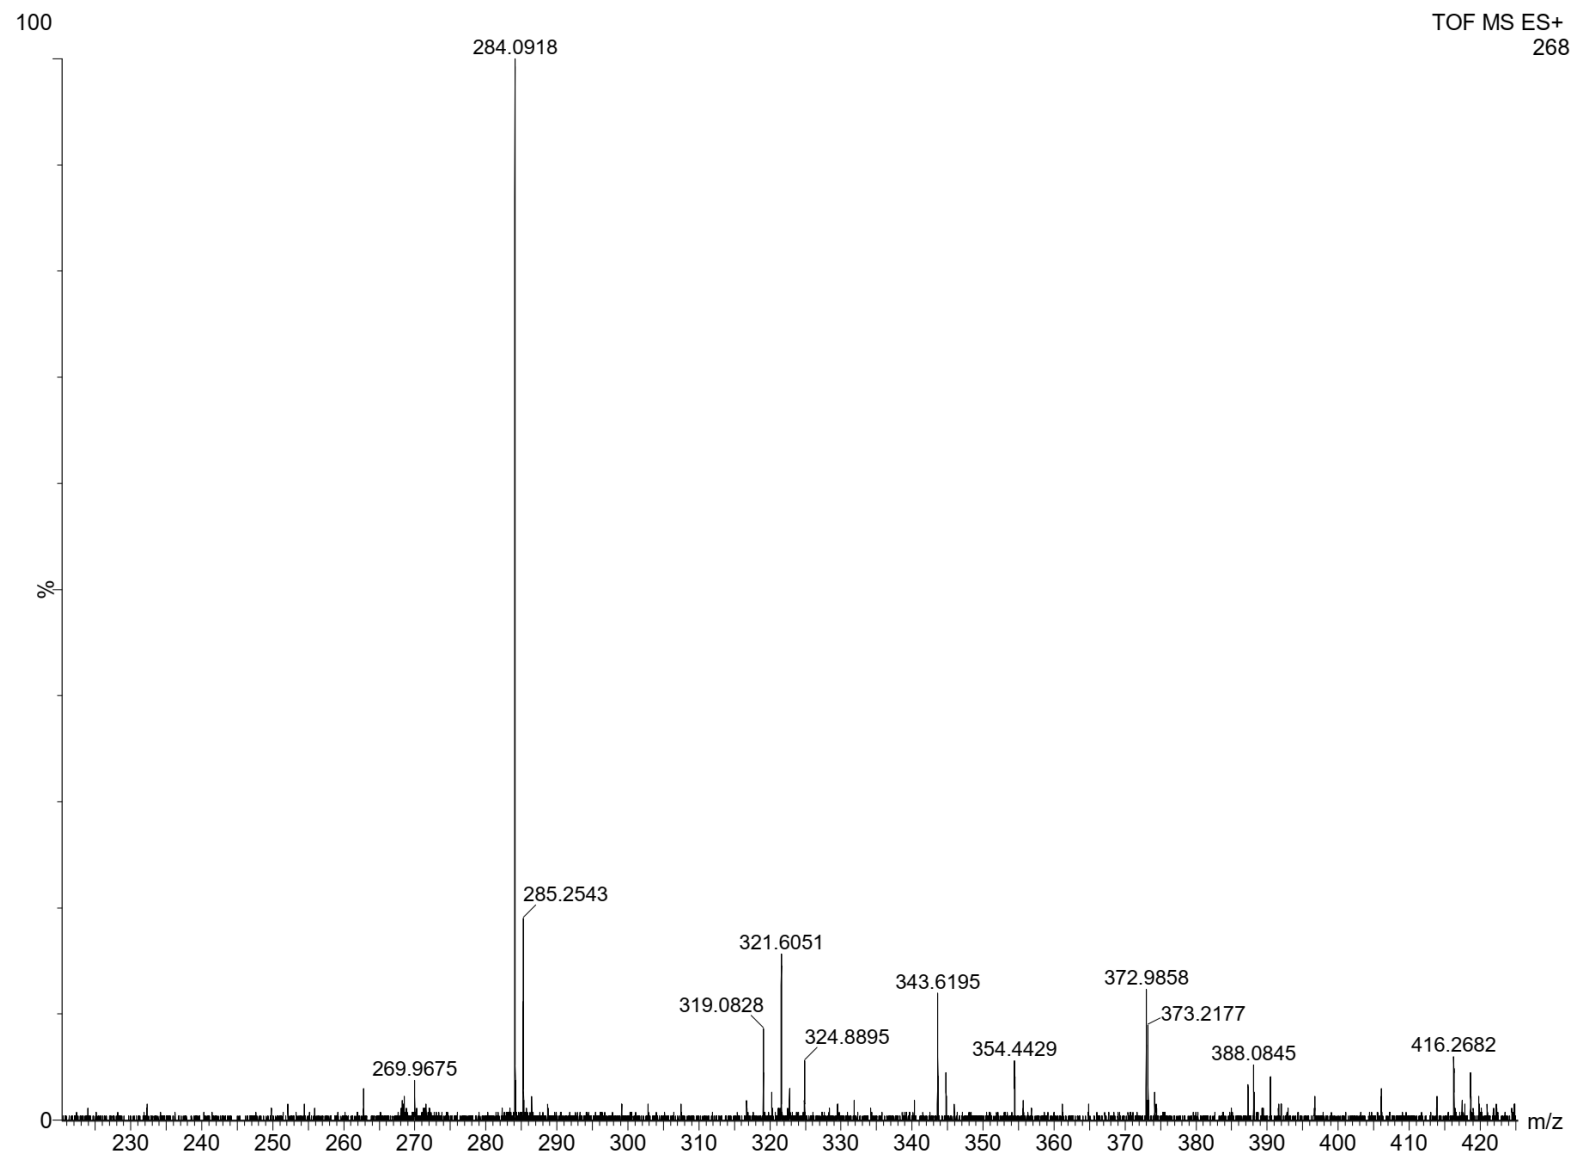

Figure S104. HRMS-ESI 2-cyano-5-methoxyphenyl 4-methoxybenzoate (3m).

# Supporting Information

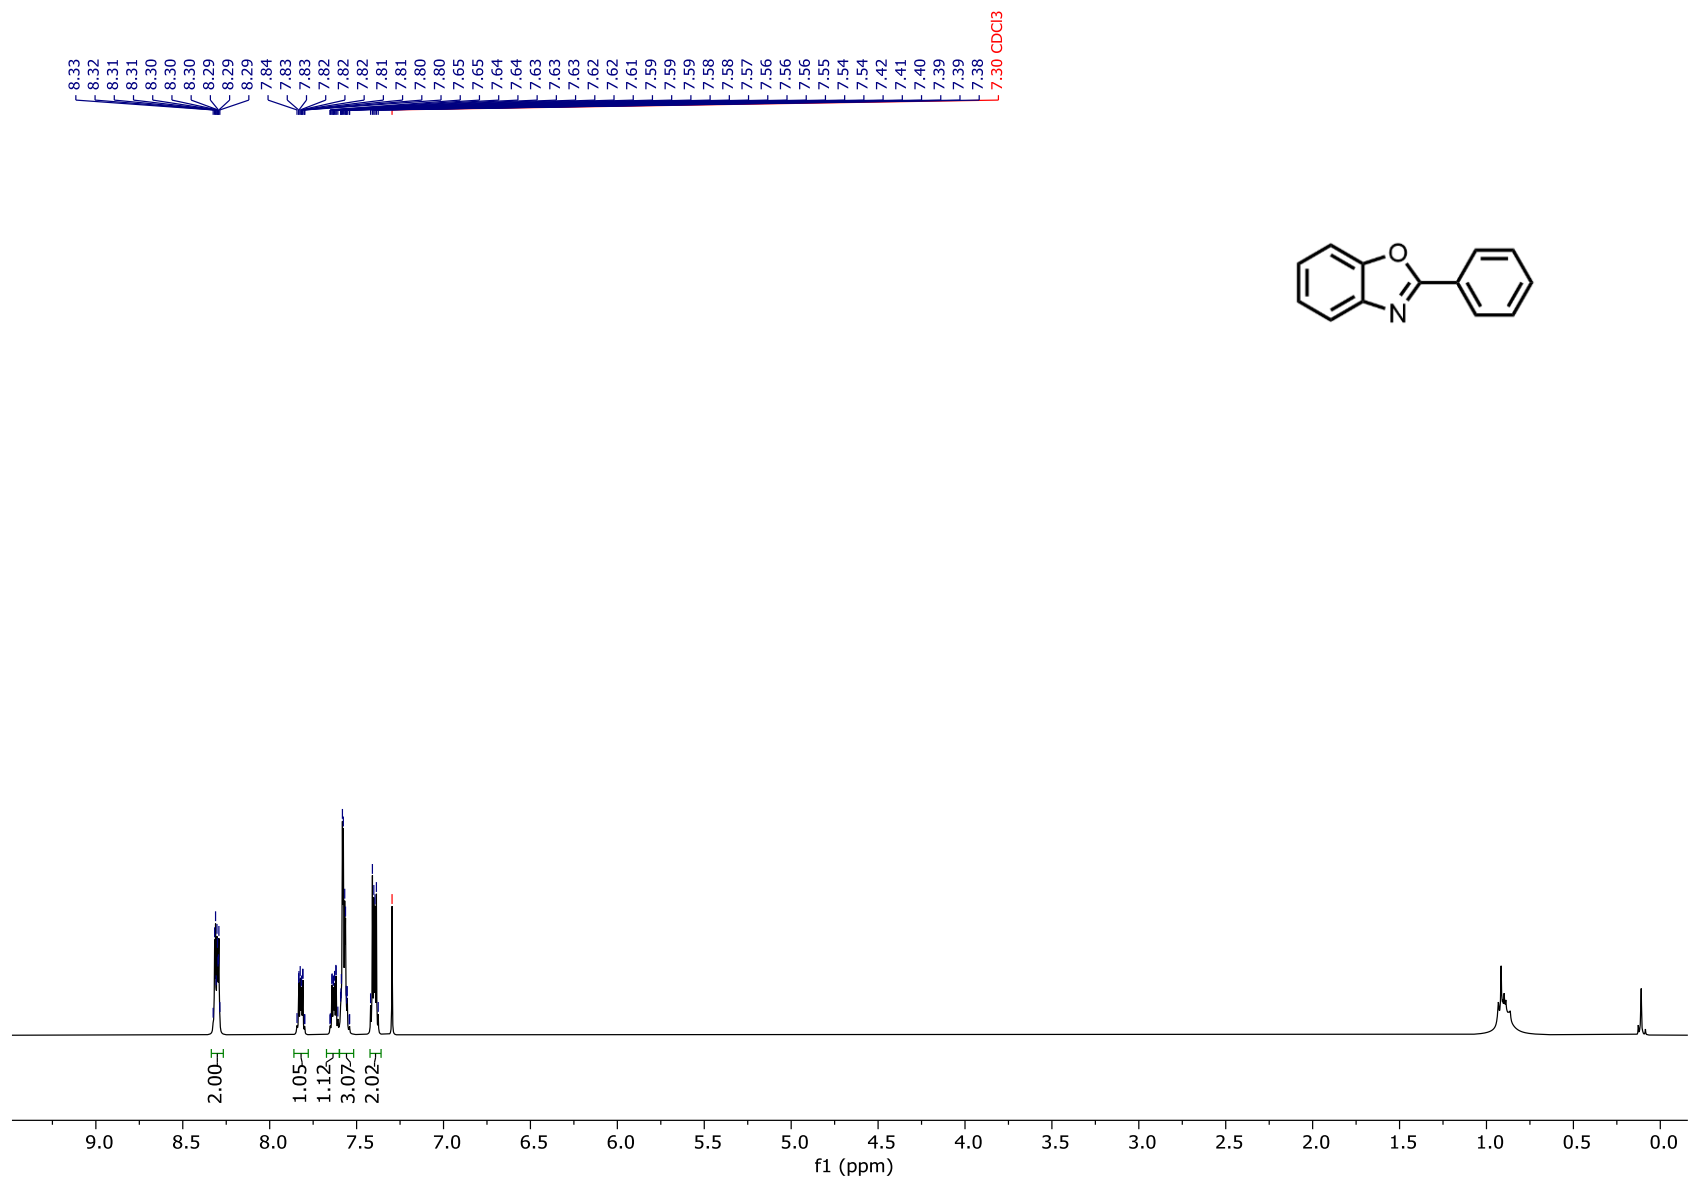

Figure S105. <sup>1</sup>H NMR (400 MHz, CDCl<sub>3</sub>) 2-phenylbenzo[d]oxazole (4a).

# Supporting Information

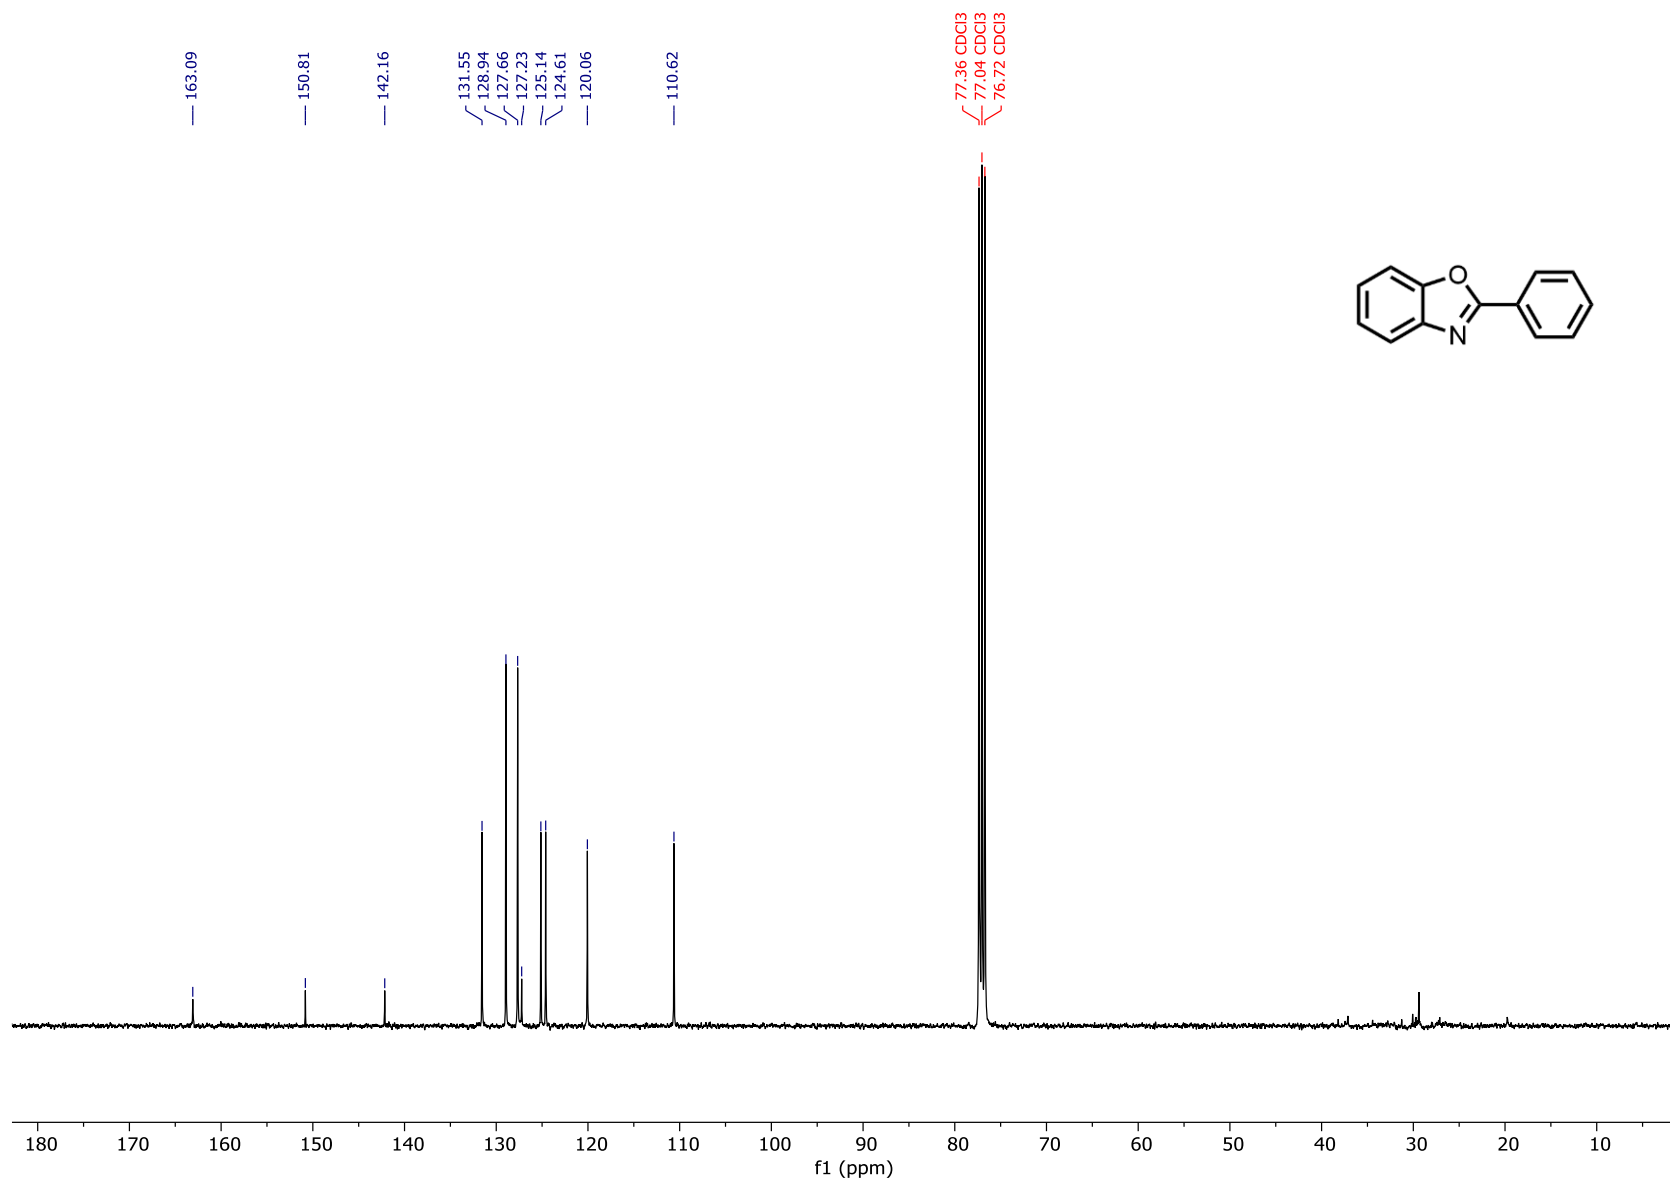

Figure S106.  $^{13}\text{C}$  NMR (101 MHz,  $\text{CDCl}_3$ ) 2-phenylbenzo[d]oxazole (4a).

## Supporting Information

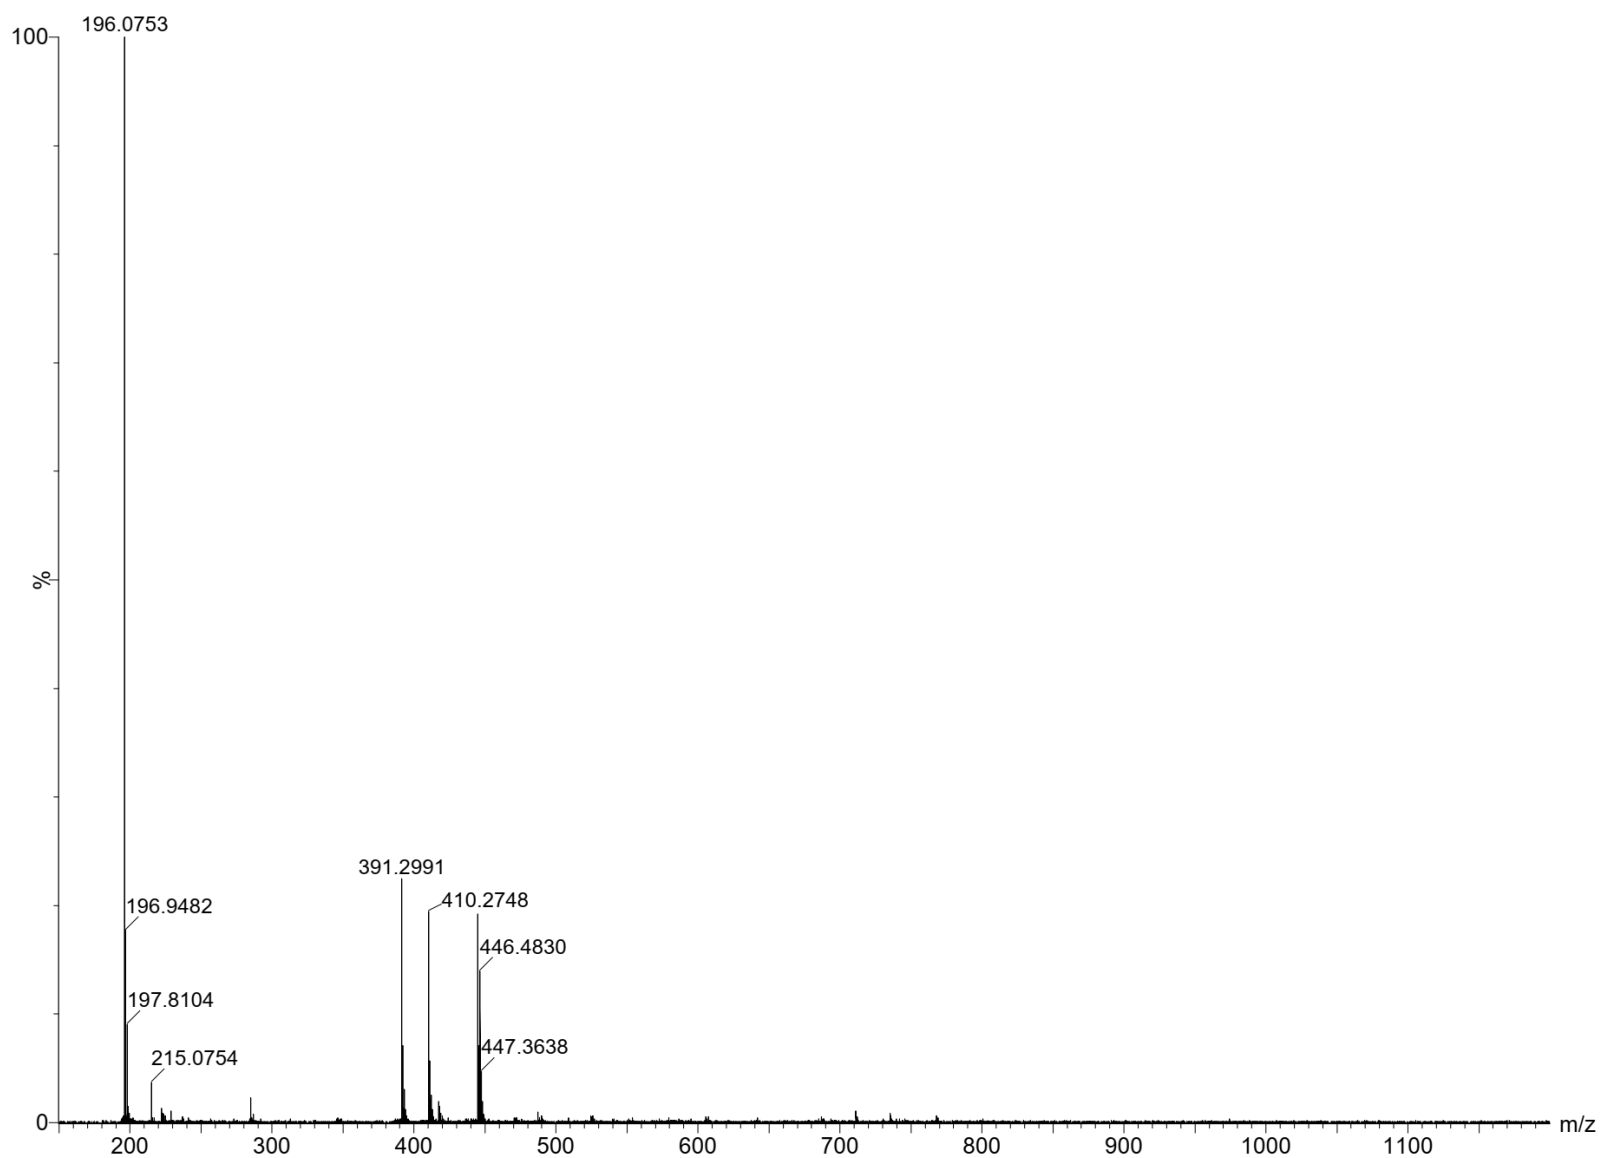

Figure S107. HRMS-ESI 2-phenylbenzo[d]oxazole (4a).

# Supporting Information

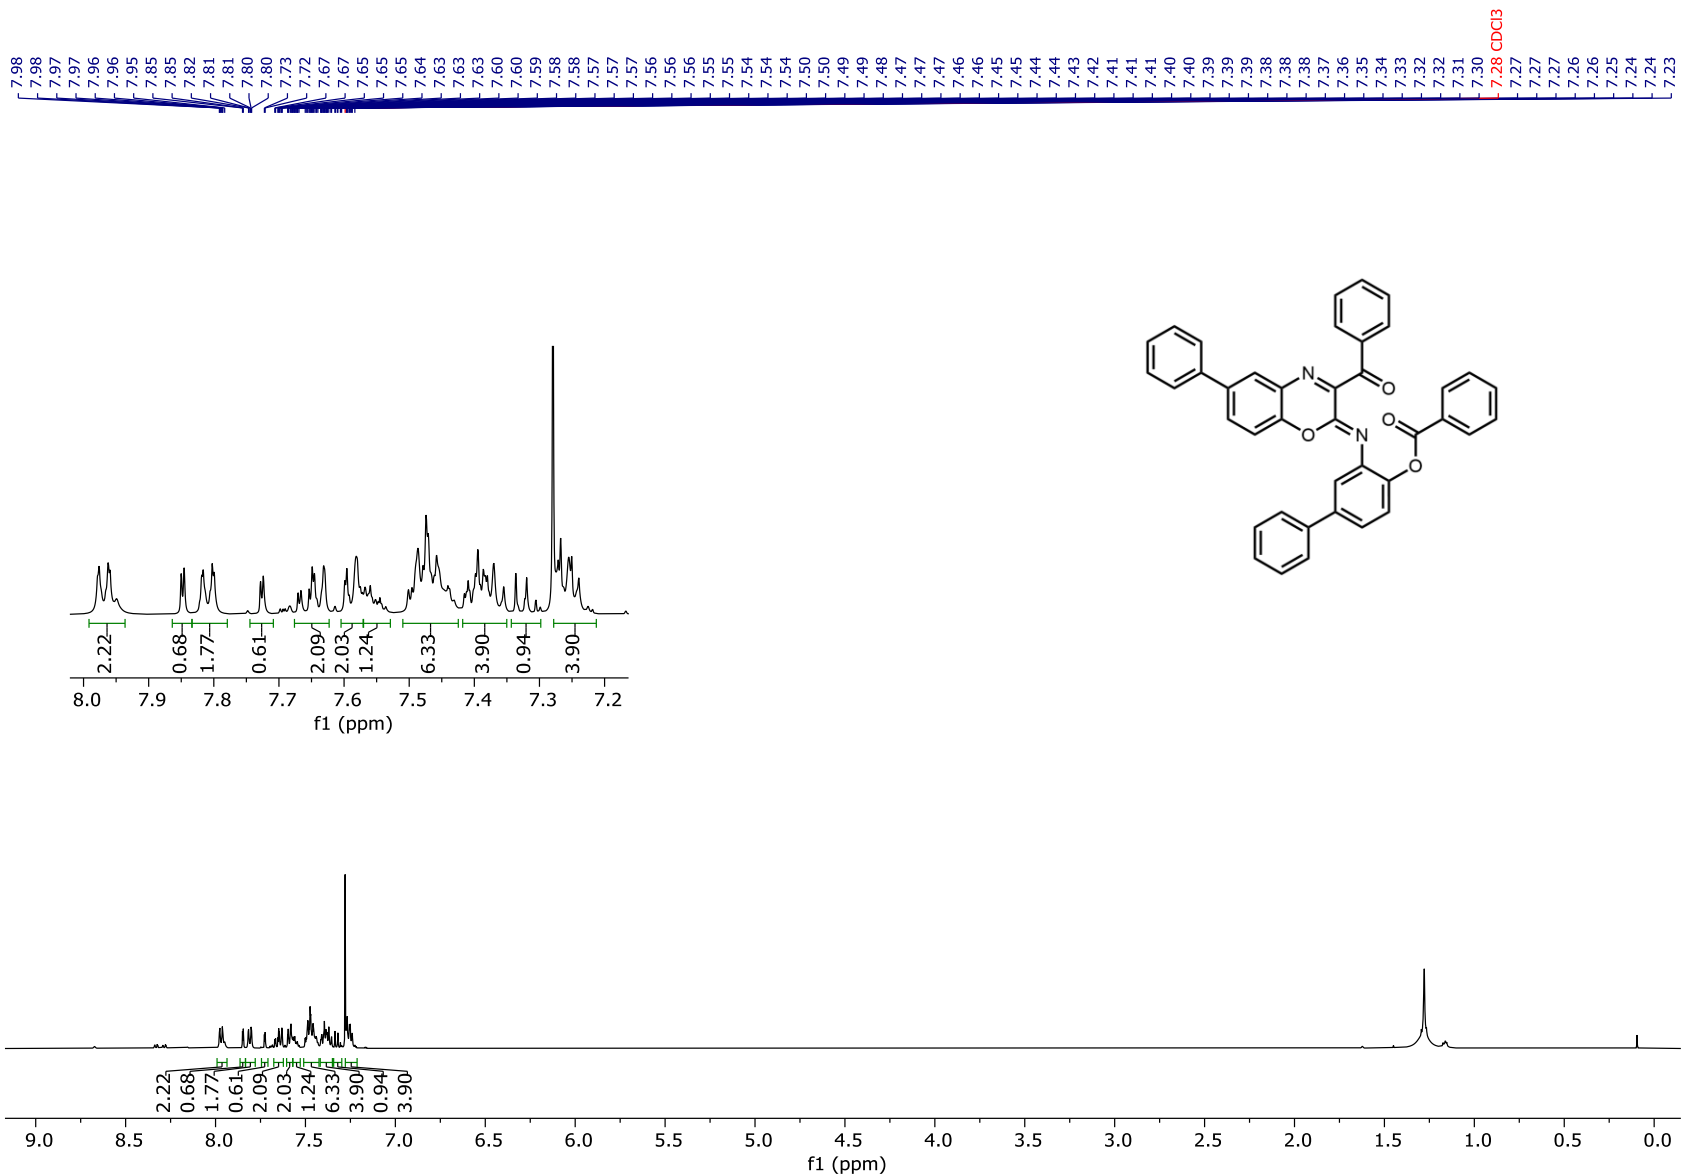

Figure S108. <sup>1</sup>H NMR (500 MHz, CDCl<sub>3</sub>) (Z)-3-((3-benzoyl-6-phenyl-2H-benzo[b][1,4]oxazin-2-ylidene)amino)-[1,1'-biphenyl]-4-yl benzoate (4f).



# Supporting Information

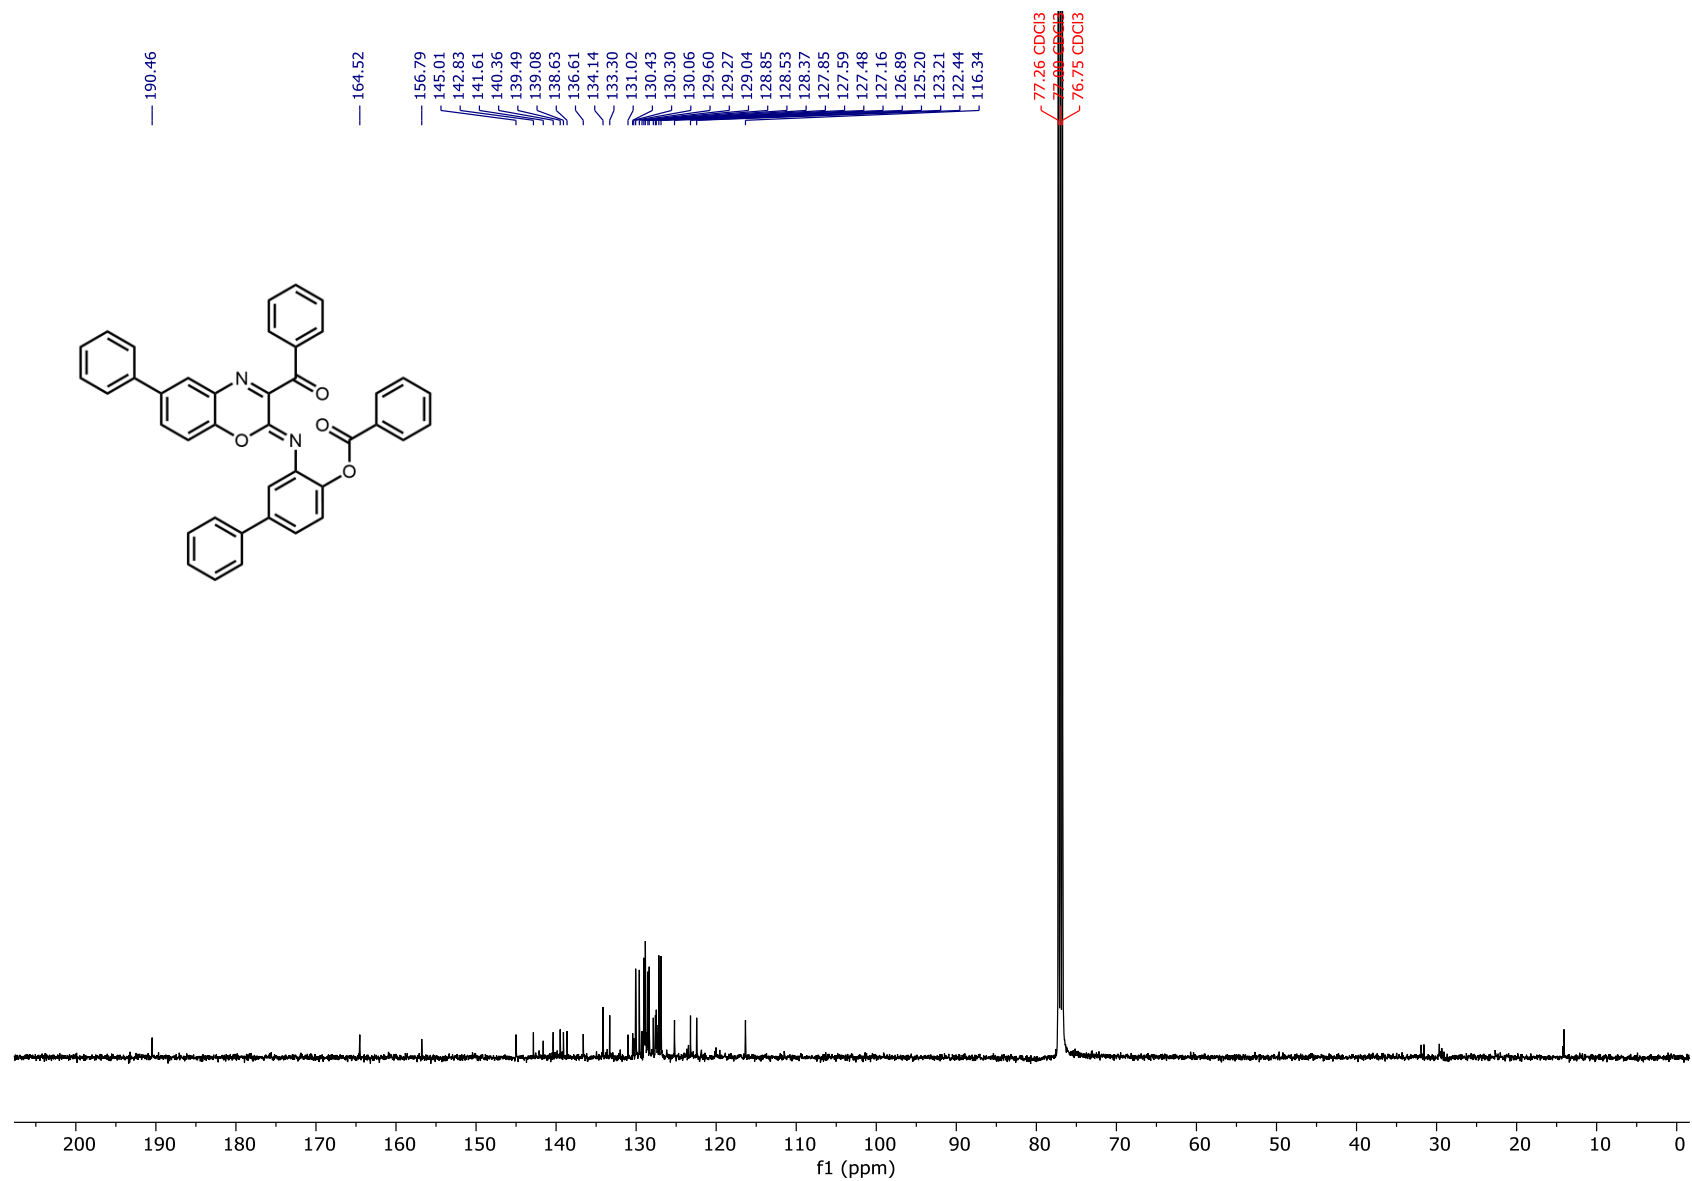

Figure S109. <sup>1</sup>H NMR (126 MHz, CDCl<sub>3</sub>) (Z)-3-((3-benzoyl-6-phenyl-2H-benzo[b][1,4]oxazin-2-ylidene)amino)-[1,1'-biphenyl]-4-yl benzoate (4f).

# Supporting Information

AK-- 30 (0.527) Cm (16:32)

TOF MS ES+  
8.94e4

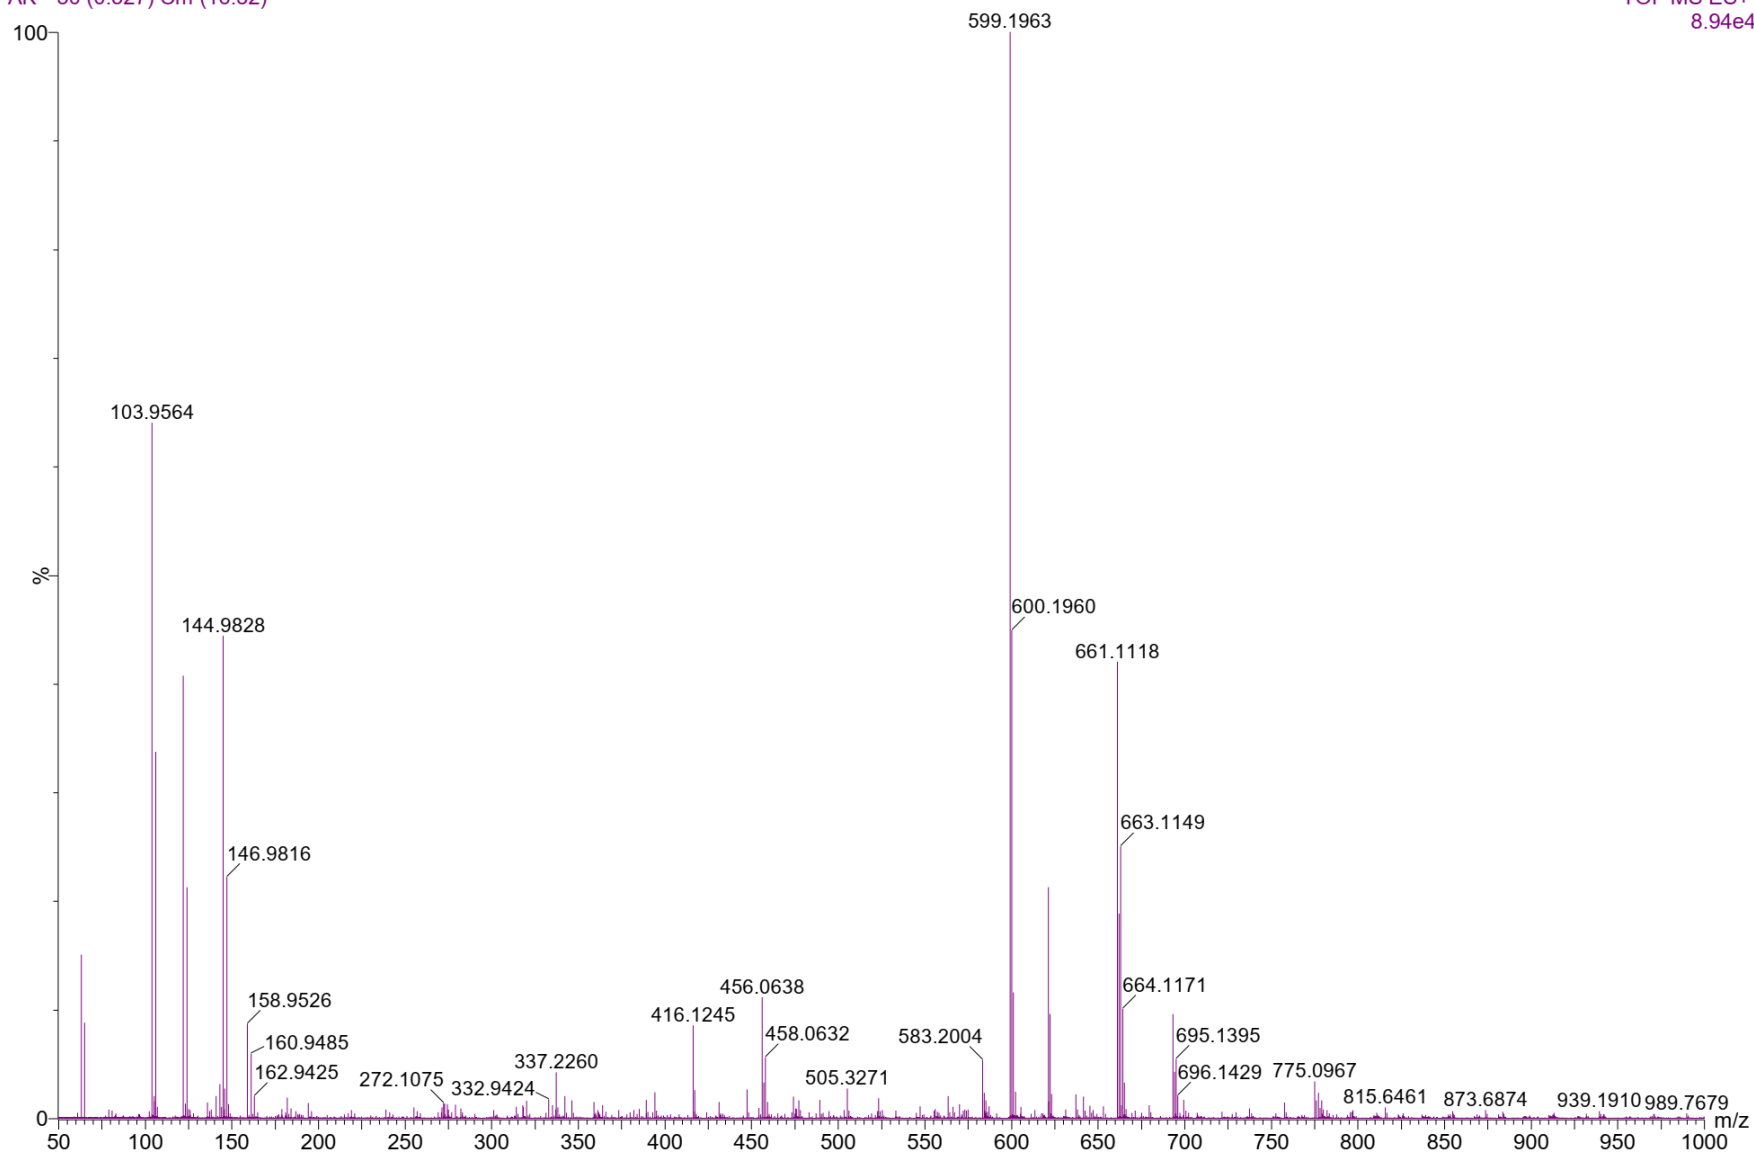

Figure S110. HRMS-ESI (Z)-3-((3-benzoyl-6-phenyl-2H-benzo[b][1,4]oxazin-2-ylidene)amino)-[1,1'-biphenyl]-4-yl benzoate (4f).
